# Supplementary material for: emIAM v1.0: an emulator for integrated assessment models using marginal abatement cost curves
Source: Copernicus journal article supplement (doi:10.5194/gmd-18-1575-2025), 2025-03-11
Supplement: Supplementary file 1 [file gmd-18-1575-2025-supplement.pdf]

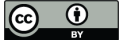

*Supplement of*

## **emIAM v1.0: an emulator for integrated assessment models using marginal abatement cost curves**

**Weiwei Xiong et al.**

*Correspondence to:* Weiwei Xiong ([weiwei.xiong@lsce.ipsl.fr](mailto:weiwei.xiong@lsce.ipsl.fr)) and Katsumasa Tanaka ([katsumasa.tanaka@lsce.ipsl.fr](mailto:katsumasa.tanaka@lsce.ipsl.fr))

The copyright of individual parts of the supplement might differ from the article licence.

## List

|                                                                                                                                                                                  |    |
|----------------------------------------------------------------------------------------------------------------------------------------------------------------------------------|----|
| Table S1. Carbon price pathways of different initial levels with a 5% of growth rate.....                                                                                        | 1  |
| Table S2. Equation forms and parameter ranges for fitting MAC curves .....                                                                                                       | 2  |
| Table S3. Statistics for function choices .....                                                                                                                                  | 3  |
| Table S4. Parameter values in global MAC curves for energy-related CO <sub>2</sub> , CH <sub>4</sub> , and N <sub>2</sub> O emissions derived from nine ENGAGE IAMs .....        | 3  |
| Table S5. Statistical validation of global emission pathways of ECB scenario without INDC reproduced from ACC2-emIAM with original emission pathways from nine ENGAGE IAMs ..... | 4  |
| Table S6. Statistical validation of regional emission pathways of ECB scenario without INDC reproduced from ACC2-emIAM with original emission pathways from five ENGAGE IAMs     | 5  |
| Table S7. Available scenarios for each model in the ENGAGE Scenario Explorer.....                                                                                                | 6  |
| Figure S1. Overview of the methods to derive AIM MAC curves and limits on abatement.....                                                                                         | 7  |
| Figure S2. Overview of the methods to derive MESSAGE MAC curves and limits on abatement.....                                                                                     | 8  |
| Figure S3. MAC curves defined with relative and absolute abatement for three models .....                                                                                        | 9  |
| Figure S4. MAC curves of total anthropogenic CO <sub>2</sub> emissions per five years for POLES.....                                                                             | 10 |
| Figure S5. Global energy-related CO <sub>2</sub> MAC curves from nine ENGAGE IAMs.....                                                                                           | 11 |
| Figure S6. Global non-energy-related CO <sub>2</sub> MAC curves from nine ENGAGE IAMs.....                                                                                       | 11 |
| Figure S7. Global total anthropogenic CH <sub>4</sub> MAC curves from nine ENGAGE IAMs.....                                                                                      | 12 |
| Figure S8. Global energy-related CH <sub>4</sub> MAC curves from nine ENGAGE IAMs.....                                                                                           | 12 |
| Figure S9. Global non-energy-related CH <sub>4</sub> MAC curves from nine ENGAGE IAMs.....                                                                                       | 13 |
| Figure S10. Global total anthropogenic N <sub>2</sub> O MAC curves from nine ENGAGE IAMs.....                                                                                    | 13 |
| Figure S11. Global energy-related N <sub>2</sub> O MAC curves from nine ENGAGE IAMs .....                                                                                        | 14 |
| Figure S12. Global non-energy-related N <sub>2</sub> O MAC curves from nine ENGAGE IAMs .....                                                                                    | 14 |
| Figure S13. Global AIM MAC curves .....                                                                                                                                          | 15 |
| Figure S14. Global COFFEE MAC curves .....                                                                                                                                       | 15 |
| Figure S15. Global GEM MAC curves.....                                                                                                                                           | 16 |
| Figure S16. Global IMAGE MAC curves .....                                                                                                                                        | 16 |
| Figure S17. Global MESSAGE MAC curves.....                                                                                                                                       | 17 |
| Figure S18. Global POLES MAC curves.....                                                                                                                                         | 17 |
| Figure S19. Global REMIND MAC curves.....                                                                                                                                        | 18 |
| Figure S20. Global TIAM MAC curves.....                                                                                                                                          | 18 |
| Figure S21. Global WITCH MAC curves .....                                                                                                                                        | 19 |



|                                                                                                                                                                                       |    |
|---------------------------------------------------------------------------------------------------------------------------------------------------------------------------------------|----|
| Figure S22. Regional AIM total anthropogenic CO <sub>2</sub> MAC curves.....                                                                                                          | 19 |
| Figure S23. Regional AIM total anthropogenic CH <sub>4</sub> MAC curves.....                                                                                                          | 20 |
| Figure S24. Regional AIM total anthropogenic N <sub>2</sub> O MAC curves.....                                                                                                         | 20 |
| Figure S25. Regional COFFEE total anthropogenic CO <sub>2</sub> MAC curves.....                                                                                                       | 21 |
| Figure S26. Regional COFFEE total anthropogenic CH <sub>4</sub> MAC curves.....                                                                                                       | 21 |
| Figure S27. Regional COFFEE total anthropogenic N <sub>2</sub> O MAC curves.....                                                                                                      | 22 |
| Figure S28. Regional GEM total anthropogenic CO <sub>2</sub> MAC curves.....                                                                                                          | 22 |
| Figure S29. Regional GEM total anthropogenic CH <sub>4</sub> MAC curves.....                                                                                                          | 23 |
| Figure S30. Regional GEM total anthropogenic N <sub>2</sub> O MAC curves .....                                                                                                        | 23 |
| Figure S31. Regional IMAGE total anthropogenic CO <sub>2</sub> MAC curves.....                                                                                                        | 24 |
| Figure S32. Regional IMAGE total anthropogenic CH <sub>4</sub> MAC curves.....                                                                                                        | 24 |
| Figure S33. Regional IMAGE total anthropogenic N <sub>2</sub> O MAC curves .....                                                                                                      | 25 |
| Figure S34. Regional MESSAGE total anthropogenic CO <sub>2</sub> MAC curves .....                                                                                                     | 25 |
| Figure S35. Regional MESSAGE total anthropogenic CH <sub>4</sub> MAC curves .....                                                                                                     | 26 |
| Figure S36. Regional MESSAGE total anthropogenic N <sub>2</sub> O MAC curves .....                                                                                                    | 26 |
| Figure S37. Global MAC curves for total anthropogenic CO <sub>2</sub> emissions derived from the set<br>of scenarios with the same carbon budgets available for five ENGAGE IAMs..... | 27 |
| Figure S38. Global GET - Distribution of first derivative of abatement levels.....                                                                                                    | 28 |
| Figure S39. Global GET - Distribution of second derivative of abatement levels.....                                                                                                   | 28 |
| Figure S40. Global AIM - Distribution of first derivative of abatement levels.....                                                                                                    | 29 |
| Figure S41. Global COFFEE - Distribution of first derivative of abatement levels .....                                                                                                | 29 |
| Figure S42. Global GEM - Distribution of first derivative of abatement levels.....                                                                                                    | 30 |
| Figure S43. Global IMAGE - Distribution of first derivative of abatement levels.....                                                                                                  | 30 |
| Figure S44. Global MESSAGE - Distribution of first derivative of abatement levels.....                                                                                                | 31 |
| Figure S45. Global POLES - Distribution of first derivative of abatement levels.....                                                                                                  | 31 |
| Figure S46. Global REMIND - Distribution of first derivative of abatement levels .....                                                                                                | 32 |
| Figure S47. Global TIAM - Distribution of first derivative of abatement levels.....                                                                                                   | 32 |
| Figure S48. Global WITCH - Distribution of first derivative of abatement levels.....                                                                                                  | 33 |
| Figure S49. Global AIM - Distribution of second derivative of abatement levels.....                                                                                                   | 33 |
| Figure S50. Global COFFEE - Distribution of second derivative of abatement levels.....                                                                                                | 34 |
| Figure S51. Global GEM - Distribution of second derivative of abatement levels .....                                                                                                  | 34 |
| Figure S52. Global IMAGE - Distribution of second derivative of abatement levels .....                                                                                                | 35 |
| Figure S53. Global MESSAGE - Distribution of second derivative of abatement levels .....                                                                                              | 35 |
| Figure S54. Global POLES - Distribution of second derivative of abatement levels .....                                                                                                | 36 |

|                                                                                                            |    |
|------------------------------------------------------------------------------------------------------------|----|
| Figure S55. Global REMIND - Distribution of second derivative of abatement levels.....                     | 36 |
| Figure S56. Global TIAM - Distribution of second derivative of abatement levels .....                      | 37 |
| Figure S57. Global WITCH - Distribution of second derivative of abatement levels .....                     | 37 |
| Figure S58. Regional AIM CO <sub>2</sub> - Distribution of first derivative of abatement levels .....      | 38 |
| Figure S59. Regional AIM CO <sub>2</sub> - Distribution of first derivative of abatement levels .....      | 38 |
| Figure S60. Regional AIM CH <sub>4</sub> - Distribution of first derivative of abatement levels.....       | 39 |
| Figure S61. Regional AIM CH <sub>4</sub> - Distribution of second derivative of abatement levels.....      | 39 |
| Figure S62. Regional AIM N <sub>2</sub> O - Distribution of first derivative of abatement levels .....     | 40 |
| Figure S63. Regional AIM N <sub>2</sub> O - Distribution of second derivative of abatement levels.....     | 40 |
| Figure S64. Regional COFFEE CO <sub>2</sub> - Distribution of first derivative of abatement levels.....    | 41 |
| Figure S65. Regional COFFEE CO <sub>2</sub> - Distribution of second derivative of abatement levels        | 41 |
| Figure S66. Regional COFFEE CH <sub>4</sub> - Distribution of first derivative of abatement levels.....    | 42 |
| Figure S67. Regional COFFEE CH <sub>4</sub> - Distribution of second derivative of abatement levels        | 42 |
| Figure S68. Regional COFFEE N <sub>2</sub> O - Distribution of first derivative of abatement levels ....   | 43 |
| Figure S69. Regional COFFEE N <sub>2</sub> O - Distribution of second derivative of abatement levels       | 43 |
| Figure S70. Regional GEM CO <sub>2</sub> - Distribution of first derivative of abatement levels.....       | 44 |
| Figure S71. Regional GEM CO <sub>2</sub> - Distribution of second derivative of abatement levels.....      | 44 |
| Figure S72. Regional GEM CH <sub>4</sub> - Distribution of first derivative of abatement levels.....       | 45 |
| Figure S73. Regional GEM CH <sub>4</sub> - Distribution of second derivative of abatement levels.....      | 45 |
| Figure S74. Regional GEM N <sub>2</sub> O - Distribution of first derivative of abatement levels.....      | 46 |
| Figure S75. Regional GEM N <sub>2</sub> O - Distribution of second derivative of abatement levels ....     | 46 |
| Figure S76. Regional IMAGE CO <sub>2</sub> - Distribution of first derivative of abatement levels.....     | 47 |
| Figure S77. Regional IMAGE CO <sub>2</sub> - Distribution of second derivative of abatement levels..       | 47 |
| Figure S78. Regional IMAGE CH <sub>4</sub> - Distribution of first derivative of abatement levels.....     | 48 |
| Figure S79. Regional IMAGE CH <sub>4</sub> - Distribution of second derivative of abatement levels..       | 48 |
| Figure S80. Regional IMAGE N <sub>2</sub> O - Distribution of first derivative of abatement levels.....    | 49 |
| Figure S81. Regional IMAGE N <sub>2</sub> O - Distribution of second derivative of abatement levels..      | 49 |
| Figure S82. Regional MESSAGE CO <sub>2</sub> - Distribution of first derivative of abatement levels.       | 50 |
| Figure S83. Regional MESSAGE CO <sub>2</sub> - Distribution of second derivative of abatement levels ..... | 50 |
| Figure S84. Regional MESSAGE CH <sub>4</sub> - Distribution of first derivative of abatement levels.       | 51 |
| Figure S85. Regional MESSAGE CH <sub>4</sub> - Distribution of second derivative of abatement levels ..... | 51 |
| Figure S86. Regional MESSAGE N <sub>2</sub> O - Distribution of first derivative of abatement levels       | 52 |

|                                                                                                                                            |    |
|--------------------------------------------------------------------------------------------------------------------------------------------|----|
| Figure S87. Regional MESSAGE N <sub>2</sub> O - Distribution of second derivative of abatement levels .....                                | 52 |
| Figure S88. The earliest year of achieving net zero indicated by our emulator.....                                                         | 53 |
| Figure S89. The relationship between abatement level and carbon price with different discount rates for GET with different portfolios..... | 54 |
| Figure S90. Overview of the validation results for ACC2-emIAM with REMIND as an example .....                                              | 54 |
| Figure S91. Test 1 – GET nine portfolios energy-related CO <sub>2</sub> validation results.....                                            | 55 |
| Figure S92. Test 1 – Global nine IAMs total anthropogenic CO <sub>2</sub> validation results .....                                         | 55 |
| Figure S93. Test 1 – Global nine IAMs total anthropogenic CH <sub>4</sub> validation results .....                                         | 56 |
| Figure S94. Test 1 – Global nine IAMs total anthropogenic N <sub>2</sub> O validation results .....                                        | 56 |
| Figure S95. Test 1 - Regional AIM total anthropogenic CO <sub>2</sub> validation results.....                                              | 57 |
| Figure S96. Test 1 - Regional AIM total anthropogenic CH <sub>4</sub> validation results.....                                              | 57 |
| Figure S97. Test 1 - Regional AIM total anthropogenic N <sub>2</sub> O validation results .....                                            | 58 |
| Figure S98. Test 1 - Regional COFFEE total anthropogenic CO <sub>2</sub> validation results.....                                           | 58 |
| Figure S99. Test 1 - Regional COFFEE total anthropogenic CH <sub>4</sub> validation results.....                                           | 59 |
| Figure S100. Test 1 - Regional COFFEE total anthropogenic N <sub>2</sub> O validation results.....                                         | 59 |
| Figure S101. Test 1 - Regional GEM total anthropogenic CO <sub>2</sub> validation results.....                                             | 60 |
| Figure S102. Test 1 - Regional GEM total anthropogenic CH <sub>4</sub> validation results.....                                             | 60 |
| Figure S103. Test 1 - Regional GEM total anthropogenic N <sub>2</sub> O validation results .....                                           | 61 |
| Figure S104. Test 1 - Regional IMAGE total anthropogenic CO <sub>2</sub> validation result .....                                           | 61 |
| Figure S105. Test 1 - Regional IMAGE total anthropogenic CH <sub>4</sub> validation results.....                                           | 62 |
| Figure S106. Test 1 - Regional IMAGE total anthropogenic N <sub>2</sub> O validation results .....                                         | 62 |
| Figure S107. Test 1 - Regional MESSAGE total anthropogenic CO <sub>2</sub> validation results .....                                        | 63 |
| Figure S108. Test 1 - Regional MESSAGE total anthropogenic CH <sub>4</sub> validation results .....                                        | 63 |
| Figure S109. Test 1 - Regional MESSAGE total anthropogenic N <sub>2</sub> O validation results .....                                       | 64 |
| Figure S110. Test 1 – GET - Reproducibility of energy-related CO <sub>2</sub> .....                                                        | 64 |
| Figure S111. Test 1 - Global nine IAMs - Reproducibility of total anthropogenic CO <sub>2</sub> .....                                      | 65 |
| Figure S112. Test 1 - Global nine IAMs - Reproducibility of total anthropogenic CH <sub>4</sub> .....                                      | 65 |
| Figure S113. Test 1 - Global nine IAMs - Reproducibility of total anthropogenic N <sub>2</sub> O.....                                      | 66 |
| Figure S114. Test 1 - Regional AIM - Reproducibility of total anthropogenic CO <sub>2</sub> .....                                          | 66 |
| Figure S115. Test 1 - Regional AIM - Reproducibility of total anthropogenic CH <sub>4</sub> .....                                          | 67 |
| Figure S116. Test 1 - Regional AIM - Reproducibility of total anthropogenic N <sub>2</sub> O .....                                         | 67 |
| Figure S117. Test 1 - Regional COFFEE - Reproducibility of total anthropogenic CO <sub>2</sub> .....                                       | 68 |

|                                                                                                       |    |
|-------------------------------------------------------------------------------------------------------|----|
| Figure S118. Test 1 - Regional COFFEE - Reproducibility of total anthropogenic CH <sub>4</sub> .....  | 68 |
| Figure S119. Test 1 - Regional COFFEE - Reproducibility of total anthropogenic N <sub>2</sub> O.....  | 69 |
| Figure S120. Test 1 - Regional GEM - Reproducibility of total anthropogenic CO <sub>2</sub> .....     | 69 |
| Figure S121. Test 1 - Regional GEM - Reproducibility of total anthropogenic CH <sub>4</sub> .....     | 70 |
| Figure S122. Test 1 - Regional GEM - Reproducibility of total anthropogenic N <sub>2</sub> O .....    | 70 |
| Figure S123. Test 1 - Regional IMAGE - Reproducibility of total anthropogenic CO <sub>2</sub> .....   | 71 |
| Figure S124. Test 1 - Regional IMAGE - Reproducibility of total anthropogenic CH <sub>4</sub> .....   | 71 |
| Figure S125. Test 1 - Regional IMAGE - Reproducibility of total anthropogenic N <sub>2</sub> O .....  | 72 |
| Figure S126. Test 1 - Regional MESSAGE - Reproducibility of total anthropogenic CO <sub>2</sub> ....  | 72 |
| Figure S127. Test 1 - Regional MESSAGE - Reproducibility of total anthropogenic CH <sub>4</sub> ....  | 73 |
| Figure S128. Test 1 - Regional MESSAGE - Reproducibility of total anthropogenic N <sub>2</sub> O .... | 73 |
| Figure S129. Test 2 – GET nine portfolios energy-related CO <sub>2</sub> validation results .....     | 74 |
| Figure S130. Test 2 – Global nine IAMs total anthropogenic CO <sub>2</sub> validation results .....   | 74 |
| Figure S131. Test 2 – Global nine IAMs total anthropogenic CH <sub>4</sub> validation results .....   | 75 |
| Figure S132. Test 2 – Global nine IAMs total anthropogenic N <sub>2</sub> O validation results .....  | 75 |
| Figure S133. Test 2 - Regional AIM total anthropogenic CO <sub>2</sub> validation results.....        | 76 |
| Figure S134. Test 2 - Regional AIM total anthropogenic CH <sub>4</sub> validation results.....        | 76 |
| Figure S135. Test 2 - Regional AIM total anthropogenic N <sub>2</sub> O validation results .....      | 77 |
| Figure S136. Test 2 - Regional COFFEE total anthropogenic CO <sub>2</sub> validation results.....     | 77 |
| Figure S137. Test 2 - Regional COFFEE total anthropogenic CH <sub>4</sub> validation results.....     | 78 |
| Figure S138. Test 2 - Regional COFFEE total anthropogenic N <sub>2</sub> O validation results.....    | 78 |
| Figure S139. Test 2 - Regional GEM total anthropogenic CO <sub>2</sub> validation results.....        | 79 |
| Figure S140. Test 2 - Regional GEM total anthropogenic CH <sub>4</sub> validation results.....        | 79 |
| Figure S141. Test 2 - Regional GEM total anthropogenic N <sub>2</sub> O validation results .....      | 80 |
| Figure S142. Test 2 - Regional IMAGE total anthropogenic CO <sub>2</sub> validation results.....      | 80 |
| Figure S143. Test 2 - Regional IMAGE total anthropogenic CH <sub>4</sub> validation results.....      | 81 |
| Figure S144. Test 2 - Regional IMAGE total anthropogenic N <sub>2</sub> O validation results .....    | 81 |
| Figure S145. Test 2 - Regional MESSAGE total anthropogenic CO <sub>2</sub> validation results .....   | 82 |
| Figure S146. Test 2 - Regional MESSAGE total anthropogenic CH <sub>4</sub> validation results .....   | 82 |
| Figure S147. Test 2 - Regional MESSAGE total anthropogenic N <sub>2</sub> O validation results .....  | 83 |
| Figure S148. Test 2 - GET - Reproducibility of energy-related CO <sub>2</sub> .....                   | 83 |
| Figure S149. Test 2 - Global nine IAMs - Reproducibility of total anthropogenic CO <sub>2</sub> ..... | 84 |
| Figure S150. Test 2 - Global nine IAMs - Reproducibility of total anthropogenic CH <sub>4</sub> ..... | 84 |
| Figure S151. Test 2 - Global nine IAMs - Reproducibility of total anthropogenic N <sub>2</sub> O..... | 85 |

|                                                                                                       |     |
|-------------------------------------------------------------------------------------------------------|-----|
| Figure S152. Test 2 - Regional AIM - Reproducibility of total anthropogenic CO <sub>2</sub> .....     | 85  |
| Figure S153. Test 2 - Regional AIM - Reproducibility of total anthropogenic CH <sub>4</sub> .....     | 86  |
| Figure S154. Test 2 - Regional AIM - Reproducibility of total anthropogenic N <sub>2</sub> O .....    | 86  |
| Figure S155. Test 2 - Regional COFFEE - Reproducibility of total anthropogenic CO <sub>2</sub> .....  | 87  |
| Figure S156. Test 2 - Regional COFFEE - Reproducibility of total anthropogenic CH <sub>4</sub> .....  | 87  |
| Figure S157. Test 2 - Regional COFFEE - Reproducibility of total anthropogenic N <sub>2</sub> O.....  | 88  |
| Figure S158. Test 2 - Regional GEM - Reproducibility of total anthropogenic CO <sub>2</sub> .....     | 88  |
| Figure S159. Test 2 - Regional GEM - Reproducibility of total anthropogenic CH <sub>4</sub> .....     | 89  |
| Figure S160. Test 2 - Regional GEM - Reproducibility of total anthropogenic N <sub>2</sub> O .....    | 89  |
| Figure S161. Test 2 - Regional IMAGE - Reproducibility of total anthropogenic CO <sub>2</sub> .....   | 90  |
| Figure S162. Test 2 - Regional IMAGE - Reproducibility of total anthropogenic CH <sub>4</sub> .....   | 90  |
| Figure S163. Test 2 - Regional IMAGE - Reproducibility of total anthropogenic N <sub>2</sub> O .....  | 91  |
| Figure S164. Test 2 - Regional MESSAGE - Reproducibility of total anthropogenic CO <sub>2</sub> ....  | 91  |
| Figure S165. Test 2 - Regional MESSAGE - Reproducibility of total anthropogenic CH <sub>4</sub> ....  | 92  |
| Figure S166. Test 2 - Regional MESSAGE - Reproducibility of total anthropogenic N <sub>2</sub> O .... | 92  |
| Figure S167. Test 3 – Global nine IAMs total anthropogenic CO <sub>2</sub> validation results .....   | 93  |
| Figure S168. Test 3 – Global nine IAMs total anthropogenic CH <sub>4</sub> validation result.....     | 93  |
| Figure S169. Test 3 – Global nine IAMs total anthropogenic N <sub>2</sub> O validation results .....  | 94  |
| Figure S170. Test 3 - Regional AIM total anthropogenic CO <sub>2</sub> validation results.....        | 94  |
| Figure S171. Test 3 - Regional AIM total anthropogenic CH <sub>4</sub> validation results.....        | 95  |
| Figure S172. Test 3 - Regional AIM total anthropogenic N <sub>2</sub> O validation results .....      | 95  |
| Figure S173. Test 3 - Regional COFFEE total anthropogenic CO <sub>2</sub> validation results.....     | 96  |
| Figure S174. Test 3 - Regional COFFEE total anthropogenic CH <sub>4</sub> validation results.....     | 96  |
| Figure S175. Test 3 - Regional COFFEE total anthropogenic N <sub>2</sub> O validation results.....    | 97  |
| Figure S176. Test 3 - Regional GEM total anthropogenic CO <sub>2</sub> validation results.....        | 97  |
| Figure S177. Test 3 - Regional GEM total anthropogenic CH <sub>4</sub> validation results.....        | 98  |
| Figure S178. Test 3 - Regional GEM total anthropogenic N <sub>2</sub> O validation results .....      | 98  |
| Figure S179. Test 3 - Regional IMAGE total anthropogenic CO <sub>2</sub> validation results.....      | 99  |
| Figure S180. Test 3 - Regional IMAGE total anthropogenic CH <sub>4</sub> validation results.....      | 99  |
| Figure S181. Test 3 - Regional IMAGE total anthropogenic N <sub>2</sub> O validation results .....    | 100 |
| Figure S182. Test 3 - Regional MESSAGE total anthropogenic CO <sub>2</sub> validation results .....   | 100 |
| Figure S183. Test 3 - Regional MESSAGE total anthropogenic CH <sub>4</sub> validation results .....   | 101 |
| Figure S184. Test 3 - Regional MESSAGE total anthropogenic N <sub>2</sub> O validation results .....  | 101 |
| Figure S185. Test 3 - Global nine IAMs - Reproducibility of total anthropogenic CO <sub>2</sub> ..... | 102 |

|                                                                                                       |     |
|-------------------------------------------------------------------------------------------------------|-----|
| Figure S186. Test 3 - Global nine IAMs - Reproducibility of total anthropogenic CH <sub>4</sub> ..... | 102 |
| Figure S187. Test 3 - Global nine IAMs - Reproducibility of total anthropogenic N <sub>2</sub> O..... | 103 |
| Figure S188. Test 3 - Regional AIM - Reproducibility of total anthropogenic CO <sub>2</sub> .....     | 103 |
| Figure S189. Test 3 - Regional AIM - Reproducibility of total anthropogenic CH <sub>4</sub> .....     | 104 |
| Figure S190. Test 3 - Regional AIM - Reproducibility of total anthropogenic N <sub>2</sub> O .....    | 104 |
| Figure S191. Test 3 - Regional COFFEE - Reproducibility of total anthropogenic CO <sub>2</sub> .....  | 105 |
| Figure S192. Test 3 - Regional COFFEE - Reproducibility of total anthropogenic CH <sub>4</sub> .....  | 105 |
| Figure S193. Test 3 - Regional COFFEE - Reproducibility of total anthropogenic N <sub>2</sub> O.....  | 106 |
| Figure S194. Test 3 - Regional GEM - Reproducibility of total anthropogenic CO <sub>2</sub> .....     | 106 |
| Figure S195. Test 3 - Regional GEM - Reproducibility of total anthropogenic CH <sub>4</sub> .....     | 107 |
| Figure S196. Test 3 - Regional GEM - Reproducibility of total anthropogenic N <sub>2</sub> O .....    | 107 |
| Figure S197. Test 3 - Regional IMAGE - Reproducibility of total anthropogenic CO <sub>2</sub> .....   | 108 |
| Figure S198. Test 3 - Regional IMAGE - Reproducibility of total anthropogenic CH <sub>4</sub> .....   | 108 |
| Figure S199. Test 3 - Regional IMAGE - Reproducibility of total anthropogenic N <sub>2</sub> O .....  | 109 |
| Figure S200. Test 3 - Regional MESSAGE - Reproducibility of total anthropogenic CO <sub>2</sub> ..    | 109 |
| Figure S201. Test 3 - Regional MESSAGE - Reproducibility of total anthropogenic CH <sub>4</sub> ..    | 110 |
| Figure S202. Test 3 - Regional MESSAGE - Reproducibility of total anthropogenic N <sub>2</sub> O..    | 110 |
| Figure S203. Test 4 – GET nine portfolios energy-related CO <sub>2</sub> validation results.....      | 111 |
| Figure S204. Test 4 – Global nine IAMs total anthropogenic CO <sub>2</sub> validation results .....   | 111 |
| Figure S205. Test 4 – Global nine IAMs total anthropogenic CH <sub>4</sub> validation results .....   | 112 |
| Figure S206. Test 4 – Global nine IAMs total anthropogenic N <sub>2</sub> O validation results .....  | 112 |
| Figure S207. Test 4 - Regional AIM total anthropogenic CO <sub>2</sub> validation results.....        | 113 |
| Figure S208. Test 4 - Regional AIM total anthropogenic CH <sub>4</sub> validation results.....        | 113 |
| Figure S209. Test 4 - Regional AIM total anthropogenic N <sub>2</sub> O validation results .....      | 114 |
| Figure S210. Test 4 - Regional COFFEE total anthropogenic CO <sub>2</sub> validation results.....     | 114 |
| Figure S211. Test 4 - Regional COFFEE total anthropogenic CH <sub>4</sub> validation results.....     | 115 |
| Figure S212. Test 4 - Regional COFFEE total anthropogenic N <sub>2</sub> O validation results.....    | 115 |
| Figure S213. Test 4 - Regional GEM total anthropogenic CO <sub>2</sub> validation results.....        | 116 |
| Figure S214. Test 4 - Regional GEM total anthropogenic CH <sub>4</sub> validation results.....        | 116 |
| Figure S215. Test 4 - Regional GEM total anthropogenic N <sub>2</sub> O validation results .....      | 117 |
| Figure S216. Test 4 - Regional IMAGE total anthropogenic CO <sub>2</sub> validation results.....      | 117 |
| Figure S217. Test 4 - Regional IMAGE total anthropogenic CH <sub>4</sub> validation results.....      | 118 |
| Figure S218. Test 4 - Regional IMAGE total anthropogenic N <sub>2</sub> O validation results .....    | 118 |
| Figure S219. Test 4 - Regional MESSAGE total anthropogenic CO <sub>2</sub> validation results .....   | 119 |

|                                                                                                       |     |
|-------------------------------------------------------------------------------------------------------|-----|
| Figure S220. Test 4 - Regional MESSAGE total anthropogenic CH <sub>4</sub> validation results .....   | 119 |
| Figure S221. Test 4 - Regional MESSAGE total anthropogenic N <sub>2</sub> O validation results .....  | 120 |
| Figure S222. Test 4 - GET - Reproducibility of energy-related CO <sub>2</sub> .....                   | 120 |
| Figure S223. Test 4 - Global nine IAMs - Reproducibility of total anthropogenic CO <sub>2</sub> ..... | 121 |
| Figure S224. Test 4 - Global nine IAMs - Reproducibility of total anthropogenic CH <sub>4</sub> ..... | 121 |
| Figure S225. Test 4 - Global nine IAMs - Reproducibility of total anthropogenic N <sub>2</sub> O..... | 122 |
| Figure S226. Test 4 - Regional AIM - Reproducibility of total anthropogenic CO <sub>2</sub> .....     | 122 |
| Figure S227. Test 4 - Regional AIM - Reproducibility of total anthropogenic CH <sub>4</sub> .....     | 123 |
| Figure S228. Test 4 - Regional AIM - Reproducibility of total anthropogenic N <sub>2</sub> O .....    | 123 |
| Figure S229. Test 4 - Regional COFFEE - Reproducibility of total anthropogenic CO <sub>2</sub> .....  | 124 |
| Figure S230. Test 4 - Regional COFFEE - Reproducibility of total anthropogenic CH <sub>4</sub> .....  | 124 |
| Figure S231. Test 4 - Regional COFFEE - Reproducibility of total anthropogenic N <sub>2</sub> O.....  | 125 |
| Figure S232. Test 4 - Regional GEM - Reproducibility of total anthropogenic CO <sub>2</sub> .....     | 125 |
| Figure S233. Test 4 - Regional GEM - Reproducibility of total anthropogenic CH <sub>4</sub> .....     | 126 |
| Figure S234. Test 4 - Regional GEM - Reproducibility of total anthropogenic N <sub>2</sub> O .....    | 126 |
| Figure S235. Test 4 - Regional IMAGE - Reproducibility of total anthropogenic CO <sub>2</sub> .....   | 127 |
| Figure S236. Test 4 - Regional IMAGE - Reproducibility of total anthropogenic CH <sub>4</sub> .....   | 127 |
| Figure S237. Test 4 - Regional IMAGE - Reproducibility of total anthropogenic N <sub>2</sub> O .....  | 128 |
| Figure S238. Test 4 - Regional MESSAGE - Reproducibility of total anthropogenic CO <sub>2</sub> ..    | 128 |
| Figure S239. Test 4 - Regional MESSAGE - Reproducibility of total anthropogenic CH <sub>4</sub> ..    | 129 |
| Figure S240. Test 4 - Regional MESSAGE - Reproducibility of total anthropogenic N <sub>2</sub> O..    | 129 |
| Figure S241. Validation results for ACC2-emIAM with mean and upper MAC curves from<br>REMIND .....    | 130 |

**Table S1. Carbon price pathways of different initial levels with a 5% of growth rate**

| Scenario | 2010 | 2015  | 2020  | 2025  | 2030  | 2035  | 2040  | 2045  | 2050  | 2055   | 2060   | 2065   | 2070   | 2075   | 2080   | 2085   | 2090   | 2095   | 2100    |
|----------|------|-------|-------|-------|-------|-------|-------|-------|-------|--------|--------|--------|--------|--------|--------|--------|--------|--------|---------|
| T0       | 0    | 0     | 0     | 0     | 0     | 0     | 0     | 0     | 0     | 0      | 0      | 0      | 0      | 0      | 0      | 0      | 0      | 0      | 0       |
| T1       | 1    | 1.3   | 1.6   | 2.1   | 2.7   | 3.4   | 4.3   | 5.5   | 7.0   | 9.0    | 11.5   | 14.6   | 18.7   | 23.8   | 30.4   | 38.8   | 49.6   | 63.3   | 80.7    |
| T2       | 2    | 2.6   | 3.3   | 4.2   | 5.3   | 6.8   | 8.6   | 11.0  | 14.1  | 18.0   | 22.9   | 29.3   | 37.4   | 47.7   | 60.9   | 77.7   | 99.1   | 126.5  | 161.5   |
| T3       | 3    | 3.8   | 4.9   | 6.2   | 8.0   | 10.2  | 13.0  | 16.5  | 21.1  | 27.0   | 34.4   | 43.9   | 56.0   | 71.5   | 91.3   | 116.5  | 148.7  | 189.8  | 242.2   |
| T5       | 5    | 6.4   | 8.1   | 10.4  | 13.3  | 16.9  | 21.6  | 27.6  | 35.2  | 44.9   | 57.3   | 73.2   | 93.4   | 119.2  | 152.1  | 194.2  | 247.8  | 316.3  | 403.7   |
| T7       | 7    | 8.9   | 11.4  | 14.6  | 18.6  | 23.7  | 30.3  | 38.6  | 49.3  | 62.9   | 80.3   | 102.4  | 130.8  | 166.9  | 213.0  | 271.8  | 346.9  | 442.8  | 565.1   |
| T10      | 10   | 12.8  | 16.3  | 20.8  | 26.5  | 33.9  | 43.2  | 55.2  | 70.4  | 89.9   | 114.7  | 146.4  | 186.8  | 238.4  | 304.3  | 388.3  | 495.6  | 632.5  | 807.3   |
| T15      | 15   | 19.1  | 24.4  | 31.2  | 39.8  | 50.8  | 64.8  | 82.7  | 105.6 | 134.8  | 172.0  | 219.5  | 280.2  | 357.6  | 456.4  | 582.5  | 743.4  | 948.8  | 1211.0  |
| T20      | 20   | 25.5  | 32.6  | 41.6  | 53.1  | 67.7  | 86.4  | 110.3 | 140.8 | 179.7  | 229.3  | 292.7  | 373.6  | 476.8  | 608.5  | 776.7  | 991.2  | 1265.1 | 1614.6  |
| T25      | 25   | 31.9  | 40.7  | 52.0  | 66.3  | 84.7  | 108.0 | 137.9 | 176.0 | 224.6  | 286.7  | 365.9  | 467.0  | 596.0  | 760.7  | 970.8  | 1239.0 | 1581.4 | 2018.3  |
| T30      | 30   | 38.3  | 48.9  | 62.4  | 79.6  | 101.6 | 129.7 | 165.5 | 211.2 | 269.6  | 344.0  | 439.1  | 560.4  | 715.2  | 912.8  | 1165.0 | 1486.8 | 1897.6 | 2421.9  |
| T40      | 40   | 51.1  | 65.2  | 83.2  | 106.1 | 135.5 | 172.9 | 220.6 | 281.6 | 359.4  | 458.7  | 585.4  | 747.2  | 953.6  | 1217.1 | 1553.3 | 1982.5 | 2530.2 | 3229.2  |
| T50      | 50   | 63.8  | 81.4  | 103.9 | 132.7 | 169.3 | 216.1 | 275.8 | 352.0 | 449.3  | 573.4  | 731.8  | 934.0  | 1192.0 | 1521.3 | 1941.6 | 2478.1 | 3162.7 | 4036.5  |
| T60      | 60   | 76.6  | 97.7  | 124.7 | 159.2 | 203.2 | 259.3 | 331.0 | 422.4 | 539.1  | 688.0  | 878.1  | 1120.8 | 1430.4 | 1825.6 | 2330.0 | 2973.7 | 3795.3 | 4843.8  |
| T70      | 70   | 89.3  | 114.0 | 145.5 | 185.7 | 237.0 | 302.5 | 386.1 | 492.8 | 629.0  | 802.7  | 1024.5 | 1307.5 | 1668.8 | 2129.8 | 2718.3 | 3469.3 | 4427.8 | 5651.1  |
| T80      | 80   | 102.1 | 130.3 | 166.3 | 212.3 | 270.9 | 345.8 | 441.3 | 563.2 | 718.8  | 917.4  | 1170.9 | 1494.3 | 1907.2 | 2434.1 | 3106.6 | 3964.9 | 5060.3 | 6458.4  |
| T90      | 90   | 114.9 | 146.6 | 187.1 | 238.8 | 304.8 | 389.0 | 496.4 | 633.6 | 808.7  | 1032.1 | 1317.2 | 1681.1 | 2145.6 | 2738.4 | 3494.9 | 4460.5 | 5692.9 | 7265.7  |
| T100     | 100  | 127.6 | 162.9 | 207.9 | 265.3 | 338.6 | 432.2 | 551.6 | 704.0 | 898.5  | 1146.7 | 1463.6 | 1867.9 | 2384.0 | 3042.6 | 3883.3 | 4956.1 | 6325.4 | 8073.0  |
| T110     | 110  | 140.4 | 179.2 | 228.7 | 291.9 | 372.5 | 475.4 | 606.8 | 774.4 | 988.4  | 1261.4 | 1609.9 | 2054.7 | 2622.4 | 3346.9 | 4271.6 | 5451.8 | 6958.0 | 8880.3  |
| T120     | 120  | 153.2 | 195.5 | 249.5 | 318.4 | 406.4 | 518.6 | 661.9 | 844.8 | 1078.2 | 1376.1 | 1756.3 | 2241.5 | 2860.8 | 3651.2 | 4659.9 | 5947.4 | 7590.5 | 9687.6  |
| T130     | 130  | 165.9 | 211.8 | 270.3 | 344.9 | 440.2 | 561.9 | 717.1 | 915.2 | 1168.1 | 1490.8 | 1902.6 | 2428.3 | 3099.2 | 3955.4 | 5048.2 | 6443.0 | 8223.1 | 10494.9 |
| T140     | 140  | 178.7 | 228.0 | 291.0 | 371.5 | 474.1 | 605.1 | 772.2 | 985.6 | 1257.9 | 1605.4 | 2049.0 | 2615.1 | 3337.6 | 4259.7 | 5436.6 | 6938.6 | 8855.6 | 11302.3 |



**Table S2. Equation forms and parameter ranges for fitting MAC curves**

|                   | AIM                                                              | GEM          | MESSAGE      | IMAGE        | COFFEE       | TIAM         | REMIND       | WITCH        | POLES        | GET          |
|-------------------|------------------------------------------------------------------|--------------|--------------|--------------|--------------|--------------|--------------|--------------|--------------|--------------|
| <b>Equation 1</b> | $f(x) = a \times x^b + c \times x^d$                             |              |              |              |              |              |              |              |              |              |
| <i>a</i>          | [0,+inf)                                                         | [0,+inf)     | [0,+inf)     | [0,+inf)     | [0,+inf)     | [0,+inf)     | [0,+inf)     | [0,+inf)     | [0,+inf)     | [0,+inf)     |
| <i>b</i>          | [0.01,100]                                                       | [0.01,100]   | [0.01,100]   | [0.01,100]   | [0.01,100]   | [0.01,100]   | [0.01,100]   | [0.01,100]   | [0.01,100]   | [0.01,100]   |
| <i>c</i>          | [0,+inf)                                                         | [0,+inf)     | [0,+inf)     | [0,+inf)     | [0,+inf)     | [0,+inf)     | [0,+inf)     | [0,+inf)     | [0,+inf)     | [0,+inf)     |
| <i>d</i>          | [0.01,100]                                                       | [0.01,100]   | [0.01,100]   | [0.01,100]   | [0.01,100]   | [0.01,100]   | [0.01,100]   | [0.01,100]   | [0.01,100]   | [0.01,100]   |
| <b>Equation 2</b> | $f(x) = a \times x + b \times (\exp^{cx} - 1)$                   |              |              |              |              |              |              |              |              |              |
| <i>a</i>          | -                                                                | -            | -            | -            | -            | -            | -            | -            | -            | -            |
| <i>b</i>          | -                                                                | -            | -            | -            | -            | -            | -            | -            | -            | -            |
| <i>c</i>          | (-inf,50]                                                        | (-inf,50]    | (-inf,50]    | (-inf,50]    | (-inf,50]    | (-inf,50]    | (-inf,50]    | (-inf,50]    | (-inf,50]    | (-inf,50]    |
| <b>Equation 3</b> | $f(x) = a \times x + b \times x^2 + c \times x^3 + d \times x^4$ |              |              |              |              |              |              |              |              |              |
| <i>a</i>          | -                                                                | -            | -            | -            | -            | -            | -            | -            | -            | -            |
| <i>b</i>          | -                                                                | -            | -            | -            | -            | -            | -            | -            | -            | -            |
| <i>c</i>          | -                                                                | -            | -            | -            | -            | -            | -            | -            | -            | -            |
| <i>d</i>          | -                                                                | -            | -            | -            | -            | -            | -            | -            | -            | -            |
| <b>Equation 4</b> | $f(x) = a \times (b^{cx} - 1)$                                   |              |              |              |              |              |              |              |              |              |
| <i>a</i>          | [0,+inf)                                                         | [0,+inf)     | [0,+inf)     | [0,+inf)     | [0,+inf)     | [0,+inf)     | [0,+inf)     | [0,+inf)     | [0,+inf)     | [0,+inf)     |
| <i>b</i>          | [0.001,+inf)                                                     | [0.001,+inf) | [0.001,+inf) | [0.001,+inf) | [0.001,+inf) | [0.001,+inf) | [0.001,+inf) | [0.001,+inf) | [0.001,+inf) | [0.001,+inf) |
| <i>c</i>          | (-inf,100]                                                       | (-inf,100]   | (-inf,100]   | (-inf,100]   | (-inf,100]   | (-inf,100]   | (-inf,100]   | (-inf,100]   | (-inf,100]   | (-inf,100]   |

**Table S3. Statistics for function choices**

The count indicates the number of times the corresponding equation was selected as the best-fitting equation for the IAM price-quantity data.

| Function     | Count      | Percentage (%) |
|--------------|------------|----------------|
| Equation 1   | 126        | 51.22          |
| Equation 2   | 15         | 6.10           |
| Equation 3   | 45         | 18.29          |
| Equation 4   | 60         | 24.39          |
| <b>Total</b> | <b>246</b> | <b>100</b>     |

**Table S4. Parameter values in global MAC curves for energy-related CO<sub>2</sub>, CH<sub>4</sub>, and N<sub>2</sub>O emissions derived from nine ENGAGE IAMs**

No data are available for energy-related CH<sub>4</sub> and N<sub>2</sub>O emissions from GEM and TIAM and energy-related N<sub>2</sub>O emissions from COFFEE.

| Model   | Gas              | a        | b    | c                       | d     | MaxABL | Max1st | Max2nd |
|---------|------------------|----------|------|-------------------------|-------|--------|--------|--------|
| AIM     | CO <sub>2</sub>  | 192.98   | 1.25 | 16.51                   | 18.28 | 112.7  | 6.4    | 1.0    |
| AIM     | CH <sub>4</sub>  | 94.24    | 0.91 | 822.81                  | 18.27 | 94.3   | 6.2    | 1.7    |
| AIM     | N <sub>2</sub> O | 171.87   | 1.41 | 1,249.37                | 12.65 | 87.2   | 5.7    | 1.1    |
| COFFEE  | CO <sub>2</sub>  | 40.32    | 1.15 | 40.48                   | 5.63  | 147.0  | 6.3    | 1.6    |
| COFFEE  | CH <sub>4</sub>  | 14.38    | 0.35 | 455.91                  | 5.77  | 88.9   | 5.0    | 3.6    |
| COFFEE  | N <sub>2</sub> O | —        | —    | —                       | —     | —      | —      | —      |
| GEM     | CO <sub>2</sub>  | 272.42   | 1.57 | 119.95                  | 6.82  | 108.0  | 6.0    | 1.4    |
| GEM     | CH <sub>4</sub>  | —        | —    | —                       | —     | —      | —      | —      |
| GEM     | N <sub>2</sub> O | —        | —    | —                       | —     | —      | —      | —      |
| IMAGE   | CO <sub>2</sub>  | 309.98   | 1.23 | 83.50                   | 24.63 | 107.6  | 6.0    | 1.1    |
| IMAGE   | CH <sub>4</sub>  | 283.45   | 1.18 | 879.73                  | 11.96 | 91.8   | 4.8    | 1.0    |
| IMAGE   | N <sub>2</sub> O | 126.54   | 0.27 | 2.290 × 10 <sup>4</sup> | 14.02 | 78.1   | 5.3    | 1.3    |
| MESSAGE | CO <sub>2</sub>  | 471.55   | 3.02 | 179.97                  | 30.24 | 112.0  | 5.0    | 0.8    |
| MESSAGE | CH <sub>4</sub>  | 2,332.36 | 7.75 | 1.039 × 10 <sup>5</sup> | 49.10 | 93.7   | 5.5    | 1.4    |
| MESSAGE | N <sub>2</sub> O | 155.77   | 0.43 | 3.818 × 10 <sup>4</sup> | 5.95  | 62.0   | 3.8    | 0.9    |
| POLES   | CO <sub>2</sub>  | 2,092.84 | 3.01 | 1,785.75                | 16.24 | 110.2  | 4.6    | 1.1    |
| POLES   | CH <sub>4</sub>  | 4,016.39 | 7.61 | 4,016.39                | 7.61  | 97.5   | 6.0    | 1.2    |
| POLES   | N <sub>2</sub> O | 630.22   | 1.71 | 1.469 × 10 <sup>4</sup> | 7.56  | 87.4   | 5.5    | 1.0    |
| REMIND  | CO <sub>2</sub>  | 316.94   | 1.82 | 591.39                  | 21.77 | 104.3  | 6.6    | 0.9    |
| REMIND  | CH <sub>4</sub>  | 143.80   | 1.02 | 2,139.05                | 14.81 | 97.7   | 5.4    | 1.6    |
| REMIND  | N <sub>2</sub> O | 44.00    | 0.17 | 5,558.24                | 2.93  | 47.8   | 2.9    | 1.0    |
| TIAM    | CO <sub>2</sub>  | 394.27   | 1.39 | 183.59                  | 11.93 | 116.2  | 4.6    | 0.8    |
| TIAM    | CH <sub>4</sub>  | —        | —    | —                       | —     | —      | —      | —      |
| TIAM    | N <sub>2</sub> O | —        | —    | —                       | —     | —      | —      | —      |
| WITCH   | CO <sub>2</sub>  | 421.02   | 1.40 | 971.12                  | 7.56  | 101.4  | 3.9    | 1.3    |
| WITCH   | CH <sub>4</sub>  | 153.56   | 3.52 | 1,528.23                | 36.27 | 99.6   | 5.9    | 3.6    |
| WITCH   | N <sub>2</sub> O | 97.19    | 0.73 | 4.379 × 10 <sup>5</sup> | 8.98  | 50.8   | 3.5    | 1.4    |

**Table S5. Statistical validation of global emission pathways of ECB scenario without INDC reproduced from ACC2-emIAM with original emission pathways from nine ENGAGE IAMs**

The table shows two indicators: i) ordinary Pearson's correlation coefficient  $r_P$  and ii) Lin's concordance coefficient  $r_C$ . The higher the value of the indicator is, the darker the color of the cell is.

|       |               | AIM              | COFFEE | GEM   | IMAGE | MESSAGE | POLES | REMIN | TIAM  | WITCH |       |
|-------|---------------|------------------|--------|-------|-------|---------|-------|-------|-------|-------|-------|
| $r_P$ | <b>Test 1</b> | CO <sub>2</sub>  | 0.986  | 0.990 | 0.985 | 0.978   | 0.986 | 0.989 | 0.969 | 0.994 | 0.975 |
|       |               | CH <sub>4</sub>  | 0.980  | 0.976 | 0.987 | 0.987   | 0.979 | 0.976 | 0.989 | 0.943 | 0.981 |
|       |               | N <sub>2</sub> O | 0.969  | 0.979 | 0.973 | 0.949   | 0.989 | 0.960 | 0.974 | 0.601 | 0.979 |
|       | <b>Test 2</b> | CO <sub>2</sub>  | 0.984  | 0.994 | 0.985 | 0.977   | 0.990 | 0.991 | 0.954 | 0.997 | 0.970 |
|       |               | CH <sub>4</sub>  | 0.820  | 0.942 | 0.930 | 0.919   | 0.977 | 0.977 | 0.945 | 0.962 | 0.967 |
|       |               | N <sub>2</sub> O | 0.961  | 0.982 | 0.979 | 0.943   | 0.988 | 0.969 | 0.970 | 0.652 | 0.984 |
|       | <b>Test 3</b> | CO <sub>2</sub>  | 0.982  | 0.992 | 0.985 | 0.976   | 0.980 | 0.990 | 0.970 | 0.767 | 0.971 |
|       |               | CH <sub>4</sub>  | 0.759  | 0.912 | 0.903 | 0.929   | 0.975 | 0.948 | 0.893 | 0.510 | 0.934 |
|       |               | N <sub>2</sub> O | 0.961  | 0.959 | 0.980 | 0.855   | 0.981 | 0.966 | 0.960 | 0.498 | 0.972 |
|       | <b>Test 4</b> | CO <sub>2</sub>  | 0.990  | 0.992 | 0.987 | 0.993   | 0.988 | 0.991 | 0.982 | 0.995 | 0.981 |
|       |               | CH <sub>4</sub>  | 0.915  | 0.914 | 0.969 | 0.983   | 0.980 | 0.956 | 0.960 | 0.962 | 0.967 |
|       |               | N <sub>2</sub> O | 0.972  | 0.959 | 0.974 | 0.931   | 0.981 | 0.962 | 0.976 | 0.705 | 0.975 |
| $r_C$ | <b>Test 1</b> | CO <sub>2</sub>  | 0.980  | 0.981 | 0.984 | 0.976   | 0.986 | 0.989 | 0.968 | 0.994 | 0.963 |
|       |               | CH <sub>4</sub>  | 0.978  | 0.974 | 0.987 | 0.983   | 0.978 | 0.975 | 0.989 | 0.940 | 0.980 |
|       |               | N <sub>2</sub> O | 0.967  | 0.974 | 0.973 | 0.946   | 0.988 | 0.958 | 0.974 | 0.535 | 0.976 |
|       | <b>Test 2</b> | CO <sub>2</sub>  | 0.978  | 0.989 | 0.984 | 0.976   | 0.990 | 0.991 | 0.953 | 0.997 | 0.961 |
|       |               | CH <sub>4</sub>  | 0.757  | 0.930 | 0.894 | 0.879   | 0.974 | 0.972 | 0.925 | 0.961 | 0.957 |
|       |               | N <sub>2</sub> O | 0.959  | 0.978 | 0.979 | 0.939   | 0.988 | 0.968 | 0.969 | 0.607 | 0.982 |
|       | <b>Test 3</b> | CO <sub>2</sub>  | 0.975  | 0.987 | 0.984 | 0.975   | 0.980 | 0.989 | 0.970 | 0.760 | 0.959 |
|       |               | CH <sub>4</sub>  | 0.660  | 0.910 | 0.875 | 0.905   | 0.974 | 0.947 | 0.855 | 0.430 | 0.916 |
|       |               | N <sub>2</sub> O | 0.957  | 0.956 | 0.977 | 0.828   | 0.981 | 0.948 | 0.953 | 0.453 | 0.962 |
|       | <b>Test 4</b> | CO <sub>2</sub>  | 0.988  | 0.986 | 0.987 | 0.992   | 0.986 | 0.990 | 0.982 | 0.994 | 0.978 |
|       |               | CH <sub>4</sub>  | 0.901  | 0.912 | 0.964 | 0.966   | 0.975 | 0.949 | 0.949 | 0.958 | 0.964 |
|       |               | N <sub>2</sub> O | 0.967  | 0.956 | 0.966 | 0.920   | 0.978 | 0.943 | 0.973 | 0.598 | 0.968 |



**Table S7. Available scenarios for each model in the ENGAGE Scenario Explorer**

0 means that the model does not provide the corresponding scenario, while 1 means that the model provides the corresponding scenario.

| Scenarios          | AIM/CGE V2.2 | COFFEE 1.1 | GEM-E3 V2021 | IMAGE 3.0 | MESSAGEx-GLOBIOM 1.1 | POLES-JRC ENGAGE | REMIND-MagPIE 2.1-4.2 | TIAM-ECN 1.1 | WITCH 5.0 | Count |
|--------------------|--------------|------------|--------------|-----------|----------------------|------------------|-----------------------|--------------|-----------|-------|
| EN_INDCi2030_300f  | 0            | 0          | 0            | 0         | 0                    | 1                | 1                     | 0            | 0         | 2     |
| EN_INDCi2030_400   | 0            | 0          | 0            | 0         | 0                    | 0                | 0                     | 0            | 0         | 0     |
| EN_INDCi2030_400f  | 0            | 1          | 0            | 0         | 0                    | 1                | 1                     | 0            | 0         | 3     |
| EN_INDCi2030_500   | 0            | 1          | 0            | 0         | 0                    | 0                | 0                     | 0            | 0         | 1     |
| EN_INDCi2030_500f  | 0            | 1          | 0            | 0         | 0                    | 1                | 1                     | 0            | 1         | 4     |
| EN_INDCi2030_600   | 0            | 1          | 0            | 0         | 0                    | 0                | 0                     | 0            | 0         | 1     |
| EN_INDCi2030_600f  | 0            | 1          | 1            | 0         | 0                    | 1                | 1                     | 0            | 1         | 5     |
| EN_INDCi2030_700   | 0            | 1          | 0            | 0         | 0                    | 0                | 1                     | 0            | 0         | 2     |
| EN_INDCi2030_700f  | 0            | 1          | 0            | 0         | 1                    | 1                | 1                     | 0            | 1         | 5     |
| EN_INDCi2030_800   | 0            | 1          | 1            | 0         | 0                    | 0                | 0                     | 0            | 1         | 4     |
| EN_INDCi2030_800f  | 1            | 1          | 1            | 1         | 1                    | 1                | 1                     | 0            | 1         | 8     |
| EN_INDCi2030_900   | 0            | 1          | 0            | 0         | 0                    | 1                | 1                     | 1            | 1         | 5     |
| EN_INDCi2030_900f  | 1            | 1          | 0            | 0         | 1                    | 1                | 1                     | 1            | 1         | 7     |
| EN_INDCi2030_1000  | 0            | 1          | 1            | 1         | 1                    | 1                | 1                     | 1            | 1         | 8     |
| EN_INDCi2030_1000f | 1            | 1          | 1            | 1         | 1                    | 1                | 1                     | 1            | 1         | 9     |
| EN_INDCi2030_1200  | 1            | 1          | 0            | 1         | 1                    | 1                | 1                     | 1            | 1         | 8     |
| EN_INDCi2030_1200f | 1            | 1          | 0            | 1         | 1                    | 1                | 1                     | 1            | 1         | 8     |
| EN_INDCi2030_1400  | 1            | 1          | 1            | 1         | 1                    | 1                | 1                     | 1            | 1         | 9     |
| EN_INDCi2030_1400f | 1            | 1          | 1            | 1         | 1                    | 1                | 1                     | 1            | 1         | 9     |
| EN_INDCi2030_1600  | 1            | 1          | 0            | 0         | 1                    | 1                | 1                     | 1            | 1         | 7     |
| EN_INDCi2030_1600f | 1            | 1          | 0            | 0         | 1                    | 1                | 1                     | 1            | 1         | 7     |
| EN_INDCi2030_1800  | 1            | 1          | 1            | 0         | 1                    | 1                | 1                     | 0            | 1         | 7     |
| EN_INDCi2030_1800f | 1            | 1          | 1            | 0         | 1                    | 1                | 1                     | 0            | 1         | 7     |
| EN_INDCi2030_2000  | 0            | 1          | 0            | 0         | 1                    | 1                | 1                     | 1            | 1         | 6     |
| EN_INDCi2030_2000f | 0            | 1          | 0            | 0         | 1                    | 1                | 1                     | 1            | 1         | 6     |
| EN_INDCi2030_2500  | 0            | 1          | 0            | 0         | 1                    | 1                | 1                     | 1            | 1         | 6     |
| EN_INDCi2030_2500f | 0            | 1          | 0            | 0         | 1                    | 1                | 1                     | 1            | 1         | 6     |
| EN_INDCi2030_3000  | 0            | 0          | 0            | 1         | 1                    | 1                | 1                     | 1            | 1         | 6     |
| EN_INDCi2030_3000f | 0            | 0          | 0            | 1         | 1                    | 1                | 1                     | 1            | 1         | 6     |
| EN_NPi2020_200f    | 0            | 0          | 0            | 0         | 1                    | 0                | 0                     | 0            | 0         | 2     |
| EN_NPi2020_300     | 0            | 0          | 0            | 0         | 0                    | 0                | 0                     | 0            | 0         | 0     |
| EN_NPi2020_300f    | 1            | 0          | 0            | 0         | 1                    | 1                | 1                     | 0            | 0         | 4     |
| EN_NPi2020_400     | 0            | 1          | 0            | 0         | 0                    | 0                | 1                     | 0            | 0         | 2     |
| EN_NPi2020_400f    | 1            | 1          | 1            | 0         | 1                    | 1                | 1                     | 0            | 1         | 7     |
| EN_NPi2020_450     | 0            | 0          | 0            | 0         | 1                    | 0                | 0                     | 0            | 1         | 2     |
| EN_NPi2020_450f    | 0            | 0          | 0            | 0         | 1                    | 0                | 0                     | 0            | 1         | 2     |
| EN_NPi2020_500     | 0            | 1          | 1            | 0         | 1                    | 1                | 1                     | 0            | 1         | 6     |
| EN_NPi2020_500f    | 1            | 1          | 1            | 0         | 1                    | 1                | 1                     | 0            | 1         | 7     |
| EN_NPi2020_600     | 1            | 1          | 1            | 0         | 1                    | 1                | 1                     | 0            | 1         | 7     |
| EN_NPi2020_600f    | 1            | 1          | 1            | 1         | 1                    | 1                | 1                     | 0            | 1         | 8     |
| EN_NPi2020_700     | 1            | 1          | 0            | 0         | 1                    | 1                | 1                     | 0            | 1         | 6     |
| EN_NPi2020_700f    | 1            | 1          | 0            | 0         | 1                    | 1                | 1                     | 0            | 1         | 6     |
| EN_NPi2020_800     | 1            | 1          | 1            | 1         | 1                    | 1                | 1                     | 1            | 1         | 9     |
| EN_NPi2020_800f    | 1            | 1          | 1            | 1         | 1                    | 1                | 1                     | 1            | 1         | 9     |
| EN_NPi2020_900     | 1            | 1          | 0            | 0         | 1                    | 1                | 1                     | 1            | 1         | 7     |
| EN_NPi2020_900f    | 1            | 1          | 0            | 0         | 1                    | 1                | 1                     | 1            | 1         | 7     |
| EN_NPi2020_1000    | 1            | 1          | 1            | 1         | 1                    | 1                | 1                     | 1            | 1         | 9     |
| EN_NPi2020_1000f   | 1            | 1          | 1            | 1         | 1                    | 1                | 1                     | 1            | 1         | 9     |
| EN_NPi2020_1200    | 1            | 1          | 0            | 1         | 1                    | 1                | 1                     | 1            | 1         | 8     |
| EN_NPi2020_1200f   | 1            | 1          | 0            | 1         | 1                    | 1                | 1                     | 1            | 1         | 8     |
| EN_NPi2020_1400    | 1            | 1          | 1            | 1         | 1                    | 1                | 1                     | 1            | 1         | 9     |
| EN_NPi2020_1400f   | 1            | 1          | 1            | 1         | 1                    | 1                | 1                     | 1            | 1         | 9     |
| EN_NPi2020_1600    | 1            | 1          | 0            | 0         | 1                    | 1                | 1                     | 1            | 1         | 7     |
| EN_NPi2020_1600f   | 1            | 1          | 0            | 0         | 1                    | 1                | 1                     | 1            | 1         | 7     |
| EN_NPi2020_1800    | 1            | 1          | 1            | 0         | 1                    | 1                | 1                     | 0            | 1         | 7     |
| EN_NPi2020_1800f   | 1            | 1          | 1            | 0         | 1                    | 1                | 1                     | 0            | 1         | 7     |
| EN_NPi2020_2000    | 0            | 1          | 0            | 0         | 1                    | 1                | 1                     | 1            | 1         | 6     |
| EN_NPi2020_2000f   | 0            | 1          | 0            | 0         | 1                    | 1                | 1                     | 1            | 1         | 6     |
| EN_NPi2020_2500    | 0            | 1          | 0            | 0         | 1                    | 1                | 1                     | 1            | 1         | 6     |
| EN_NPi2020_2500f   | 0            | 1          | 0            | 0         | 1                    | 1                | 1                     | 1            | 1         | 6     |
| EN_NPi2020_3000    | 0            | 0          | 0            | 1         | 1                    | 1                | 1                     | 1            | 1         | 6     |
| EN_NPi2020_3000f   | 0            | 0          | 0            | 1         | 1                    | 1                | 1                     | 1            | 1         | 6     |
| EN_NPi2100         | 1            | 1          | 1            | 1         | 1                    | 1                | 1                     | 1            | 1         | 9     |
| <b>Count</b>       | <b>33</b>    | <b>52</b>  | <b>23</b>    | <b>21</b> | <b>51</b>            | <b>53</b>        | <b>57</b>             | <b>35</b>    | <b>53</b> |       |

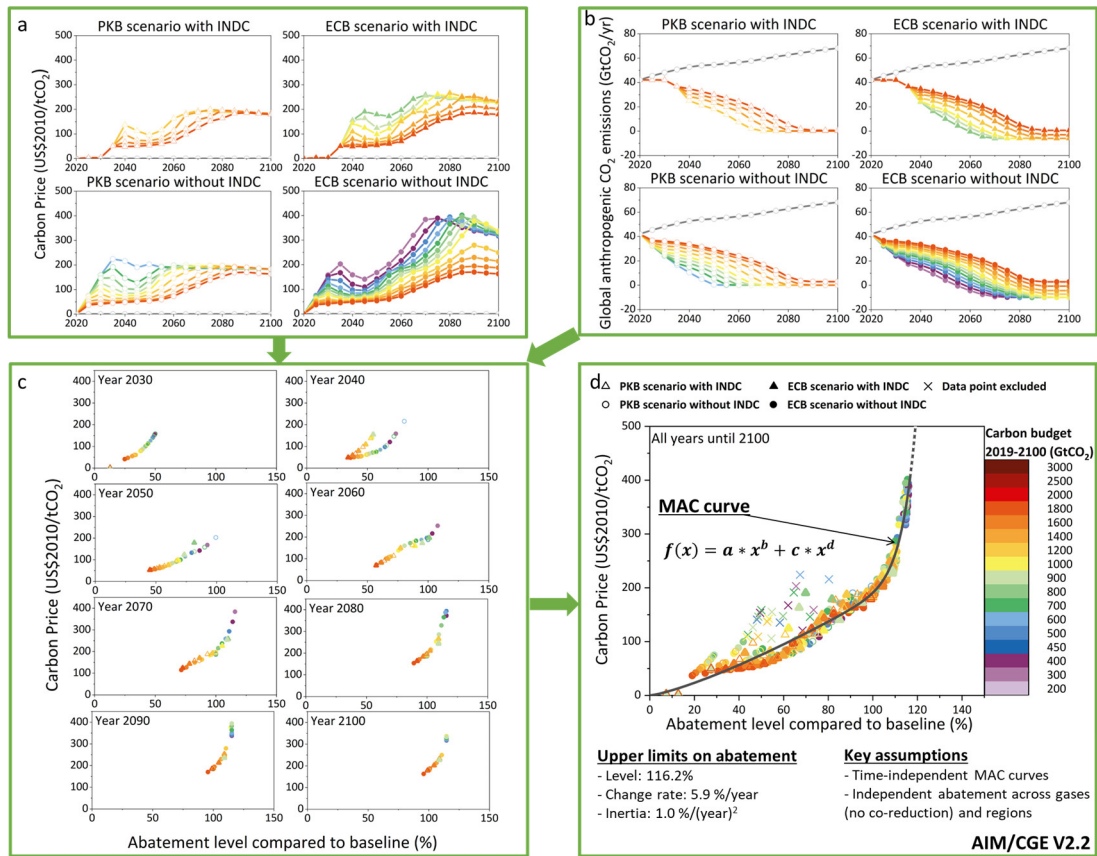

**Figure S1. Overview of the methods to derive AIM MAC curves and limits on abatement**  
 The description of the figure can be found in the caption of Figure 1.



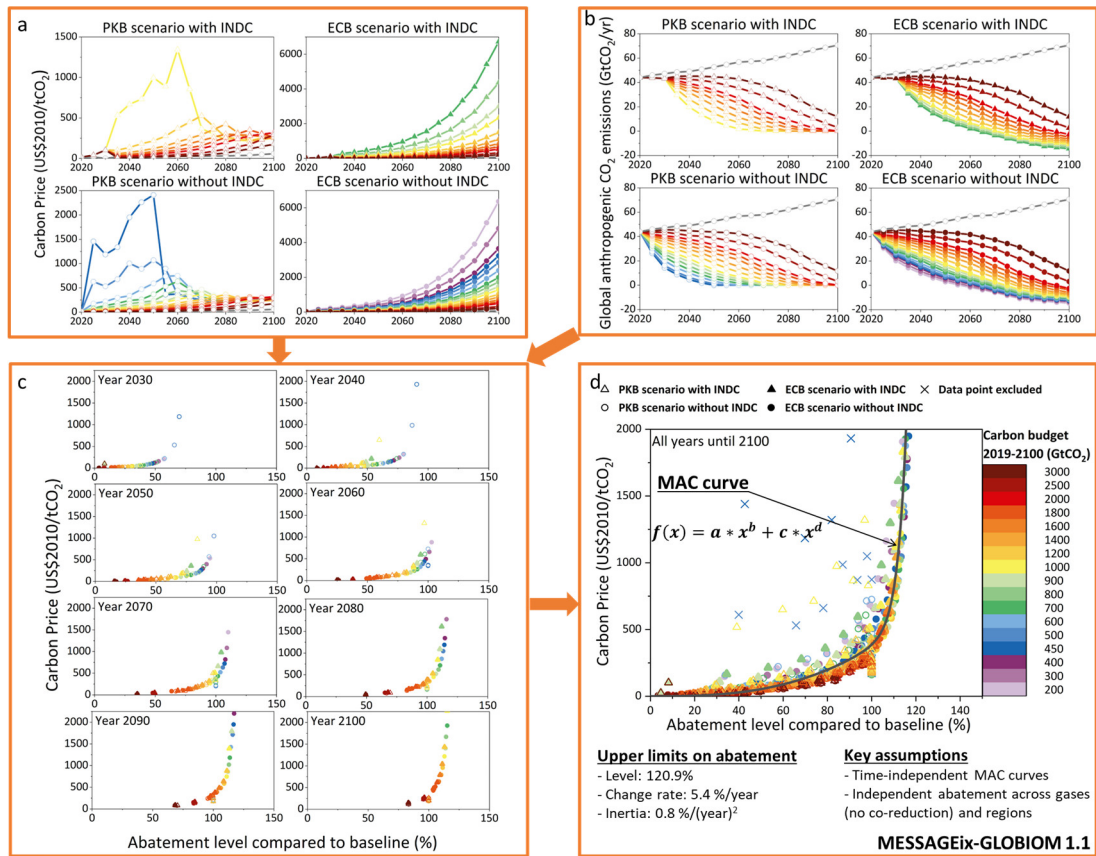

**Figure S2. Overview of the methods to derive MESSAGE MAC curves and limits on abatement**

The description of the figure can be found in the caption of Figure 1.

## MAC curves defined with relative and absolute abatement

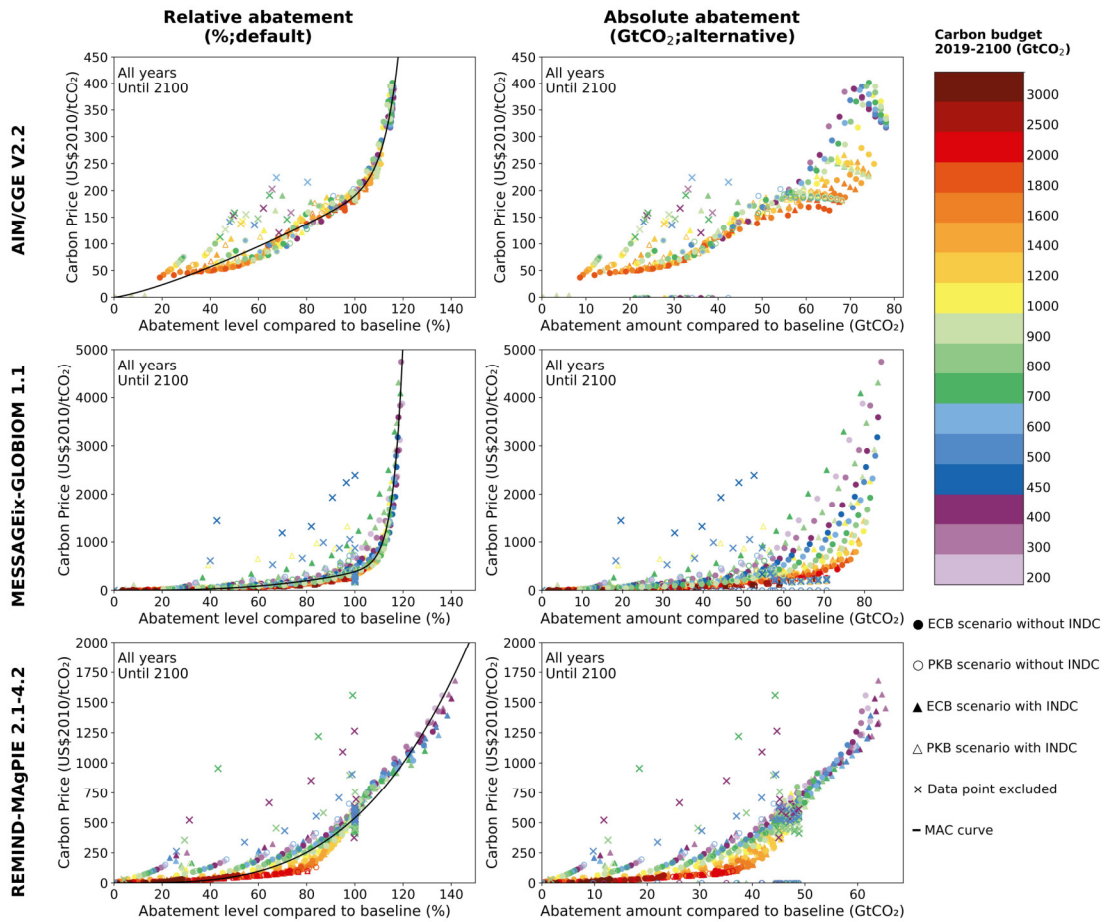

**Figure S3. MAC curves defined with relative and absolute abatement for three models**  
 The left three panels show the relationship between carbon price and relative abatement level, while the right three panels show the relationship between carbon price and absolute abatement level. Black lines in the left three panels are MAC curves in percentage used in our study.



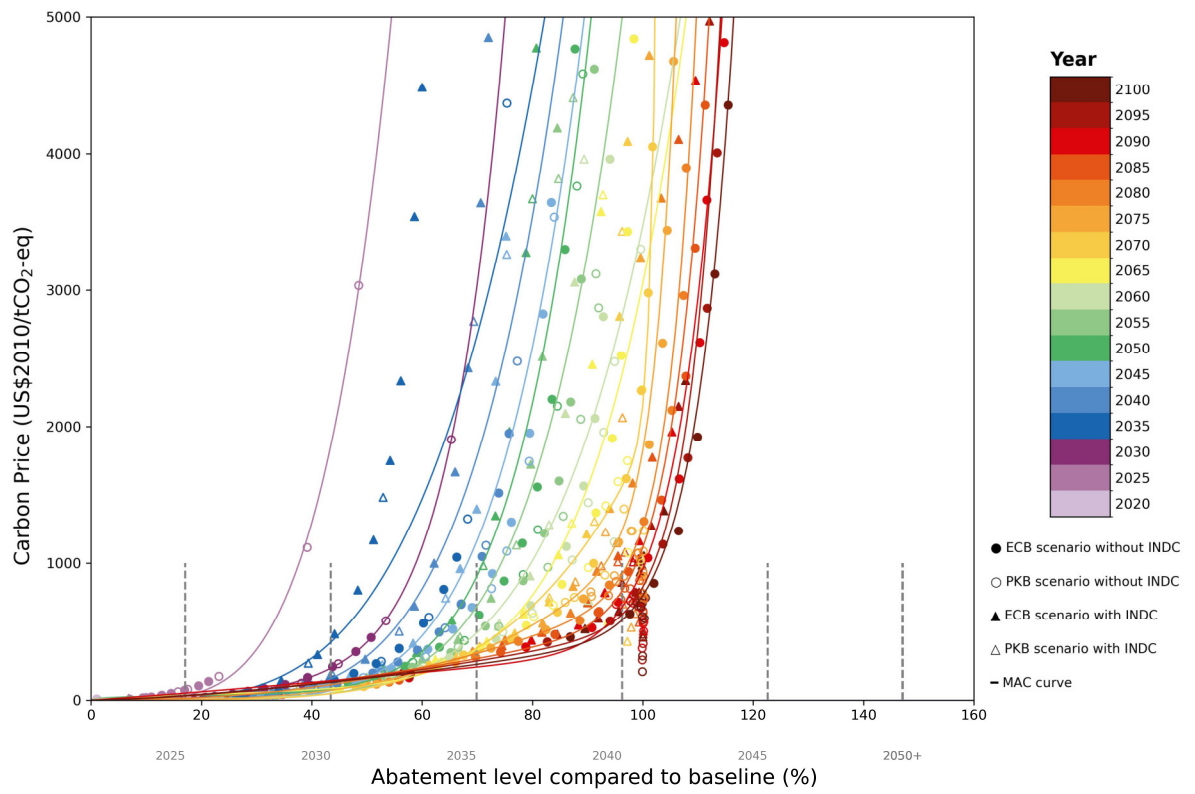

**Figure S4. MAC curves of total anthropogenic CO<sub>2</sub> emissions per five years for POLES**  
 The dots are original data from the POLES model, and the lines are MAC curves derived from these data for different years.

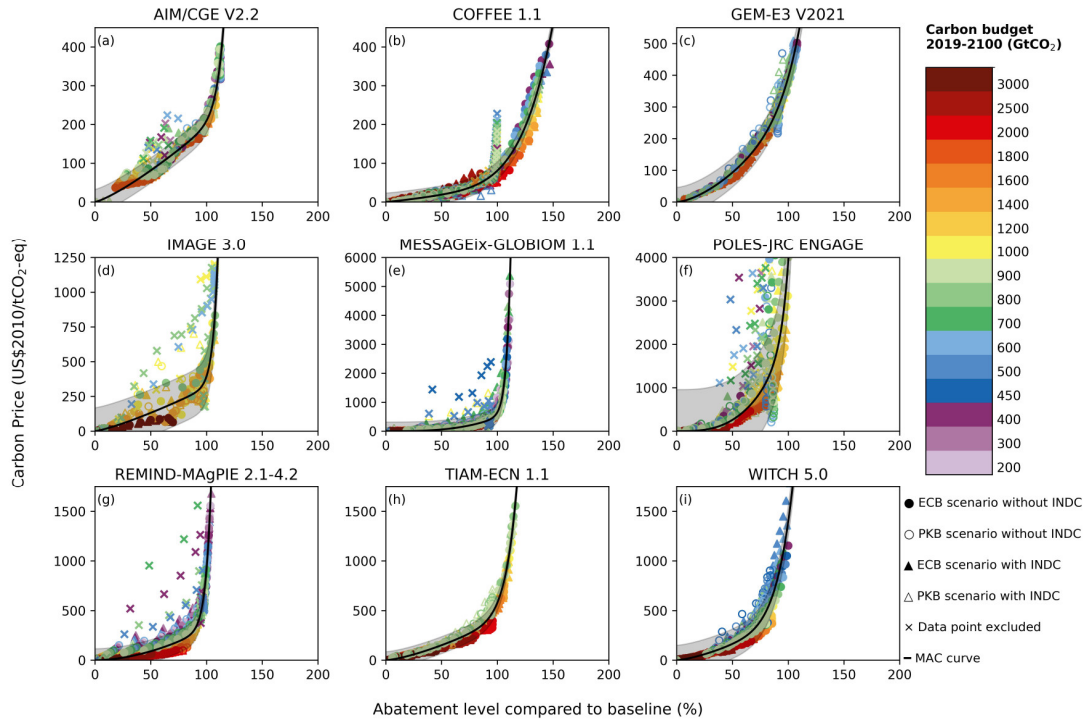

**Figure S5. Global energy-related CO<sub>2</sub> MAC curves from nine ENGAGE IAMs**  
 The description of the figure can be found in the caption of Figure 2. The same below.

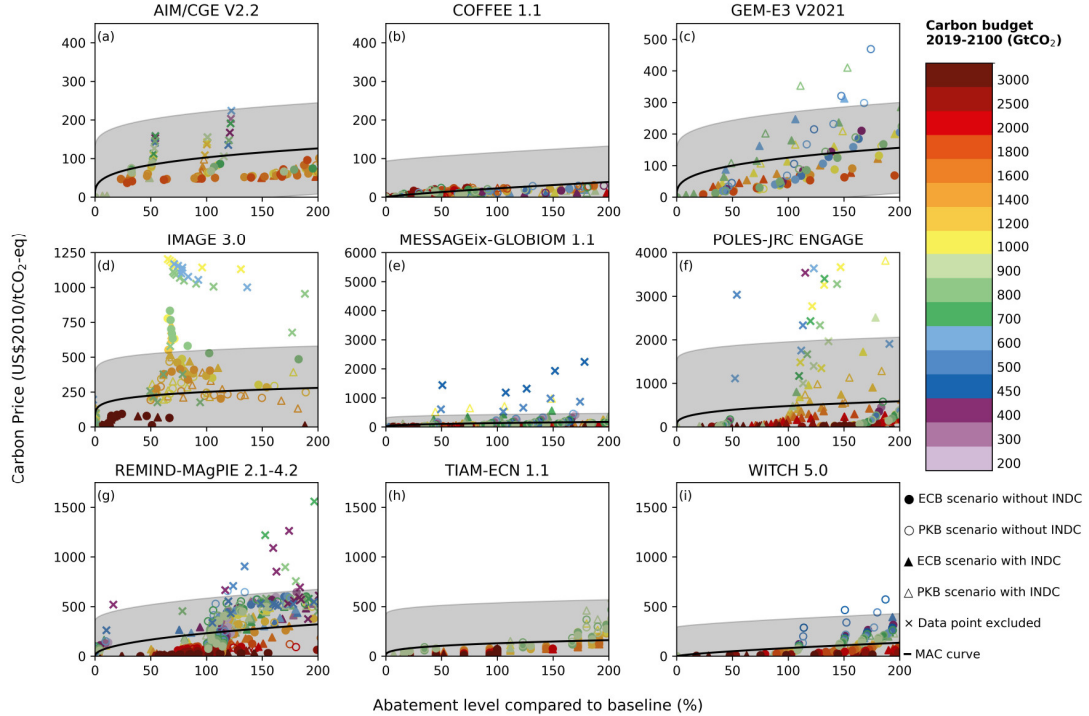

**Figure S6. Global non-energy-related CO<sub>2</sub> MAC curves from nine ENGAGE IAMs**

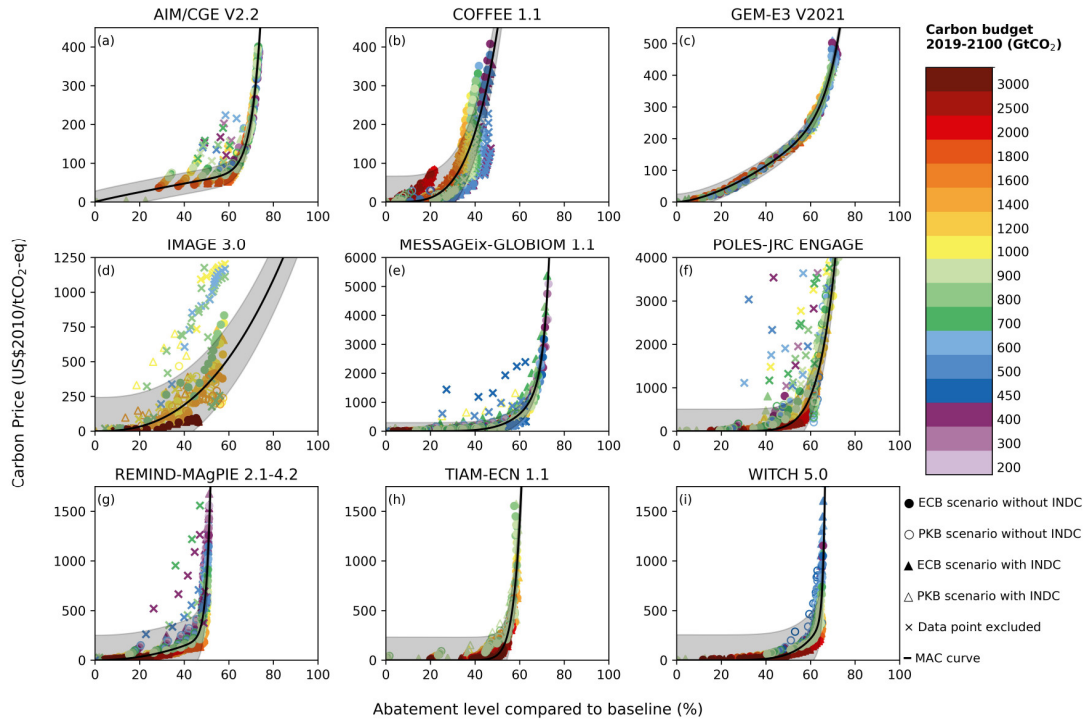

**Figure S7. Global total anthropogenic CH<sub>4</sub> MAC curves from nine ENGAGE IAMs**

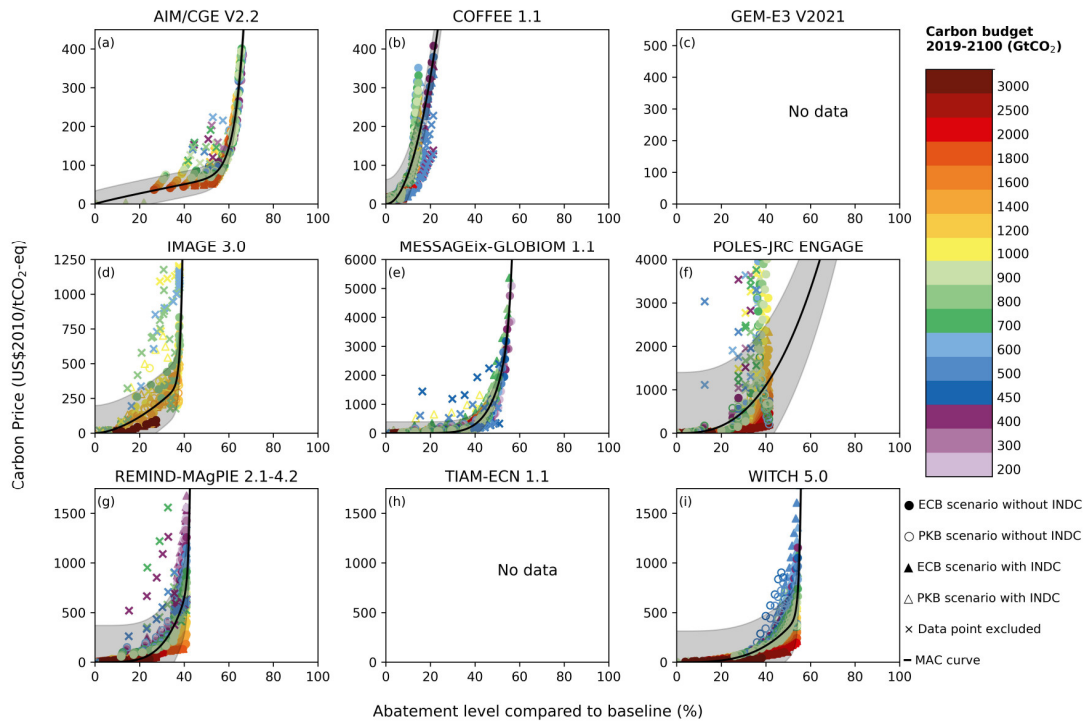

**Figure S8. Global energy-related CH<sub>4</sub> MAC curves from nine ENGAGE IAMs**

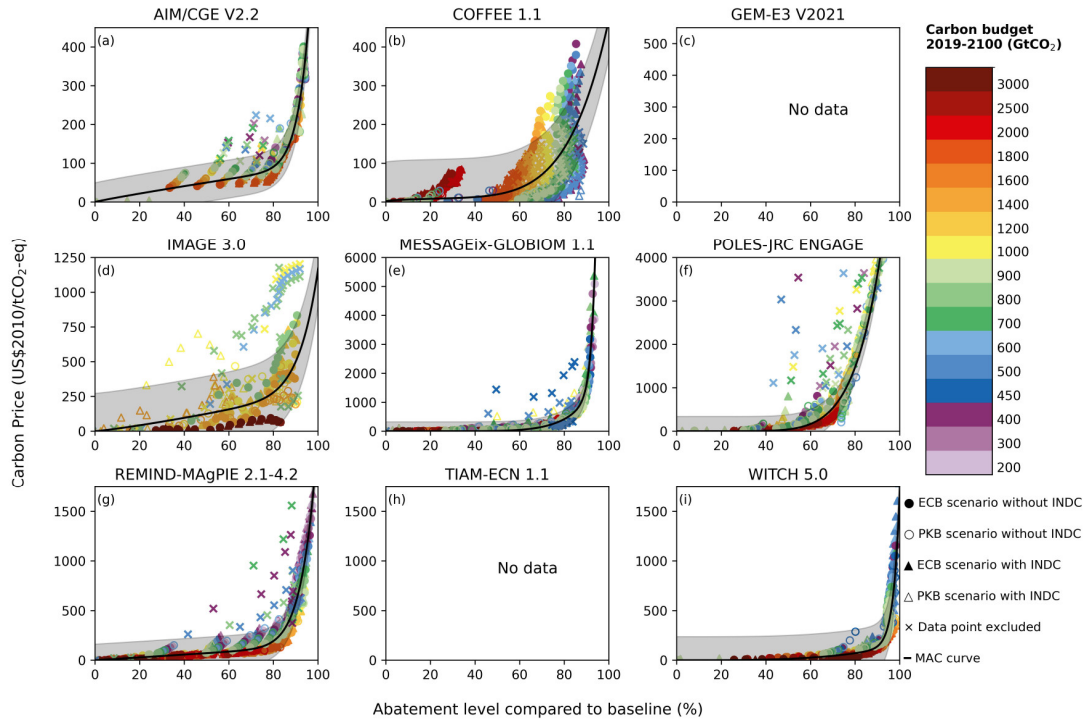

**Figure S9. Global non-energy-related CH<sub>4</sub> MAC curves from nine ENGAGE IAMs**

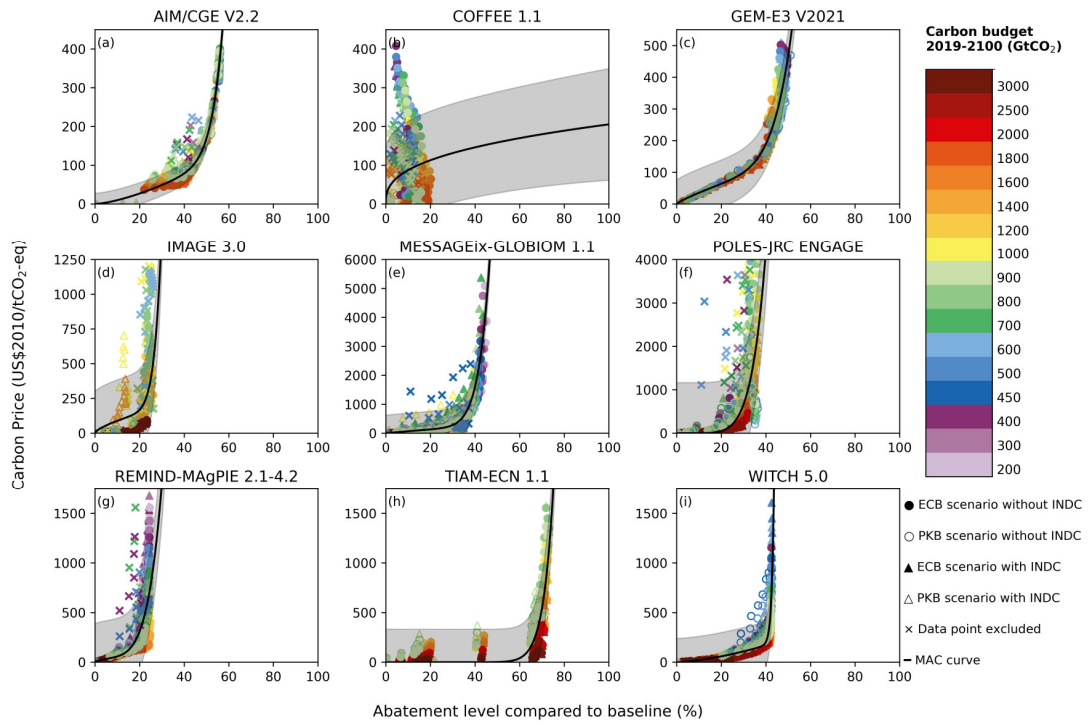

**Figure S10. Global total anthropogenic N<sub>2</sub>O MAC curves from nine ENGAGE IAMs**

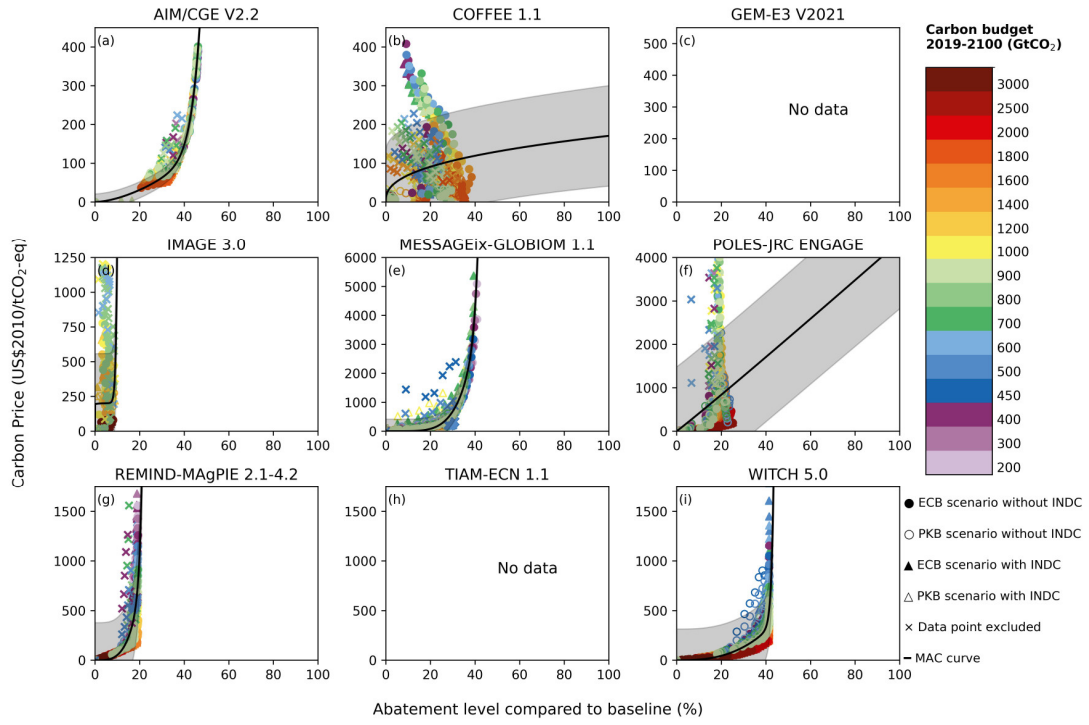

Figure S11. Global energy-related N<sub>2</sub>O MAC curves from nine ENGAGE IAMs

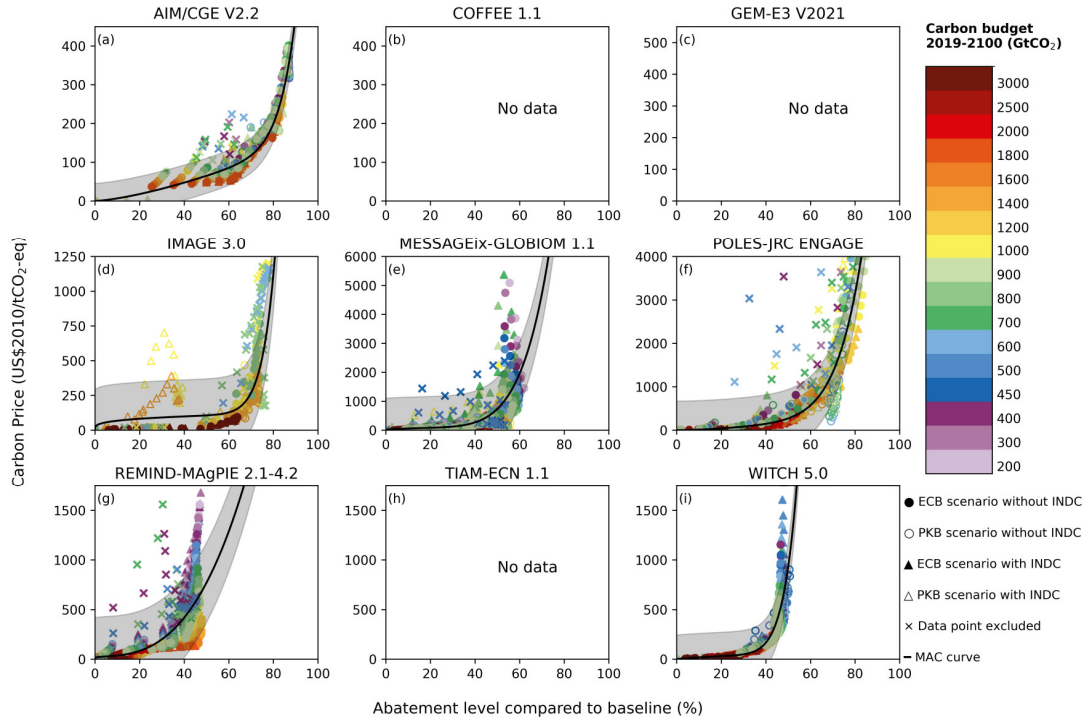

Figure S12. Global non-energy-related N<sub>2</sub>O MAC curves from nine ENGAGE IAMs

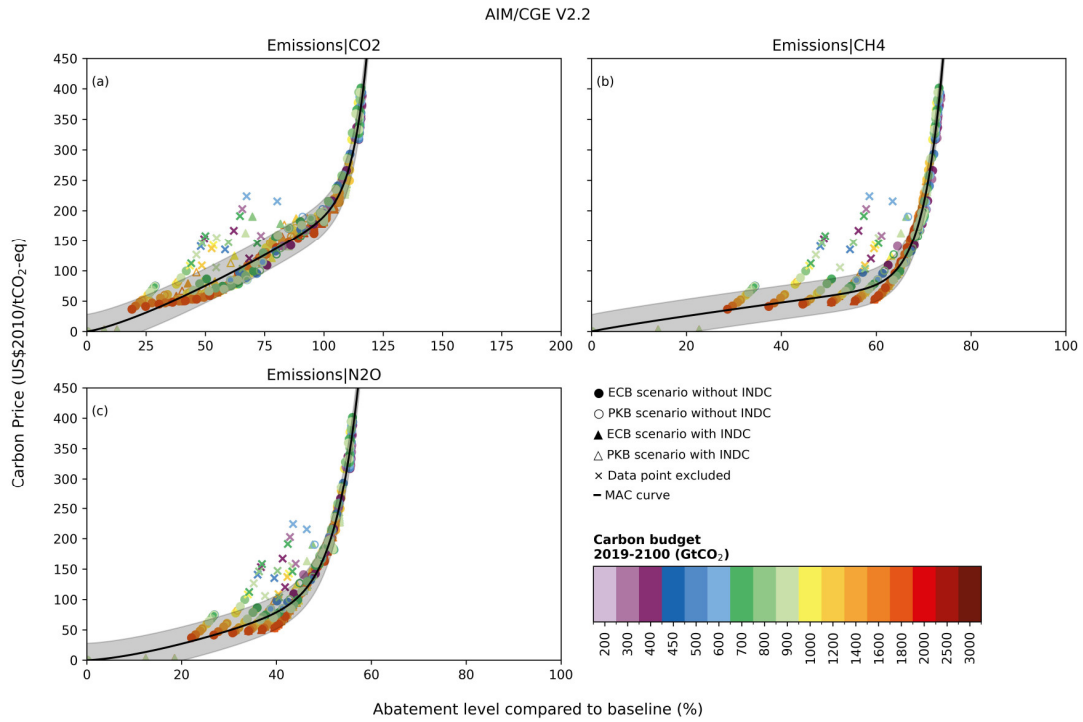

**Figure S13. Global AIM MAC curves**

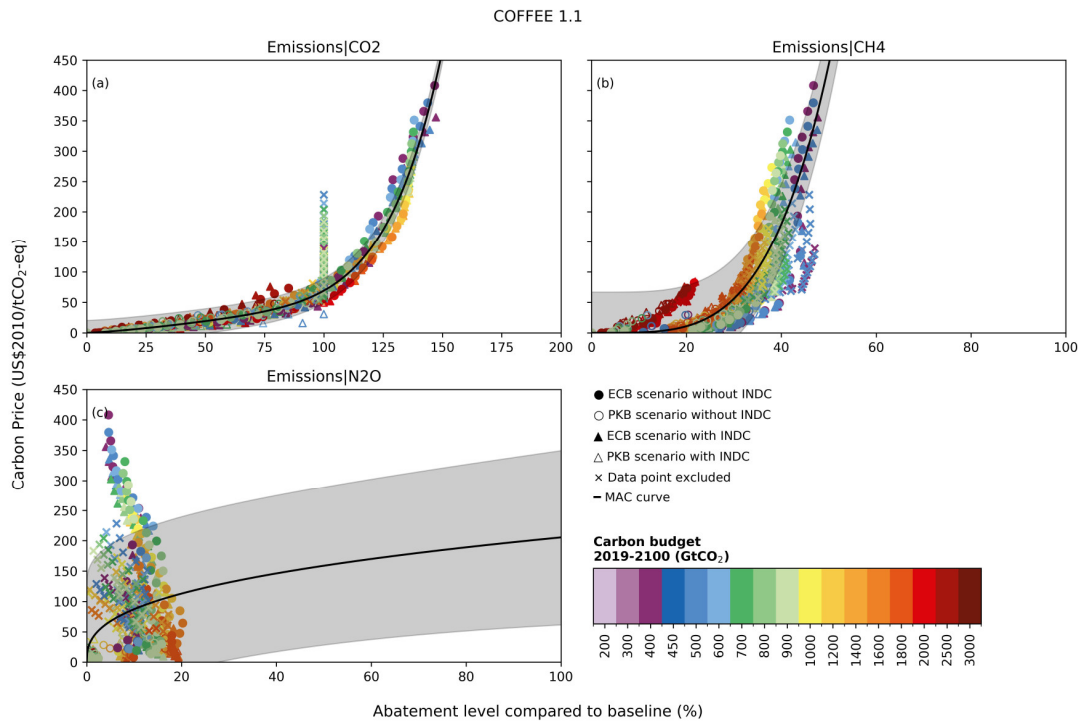

**Figure S14. Global COFFEE MAC curves**



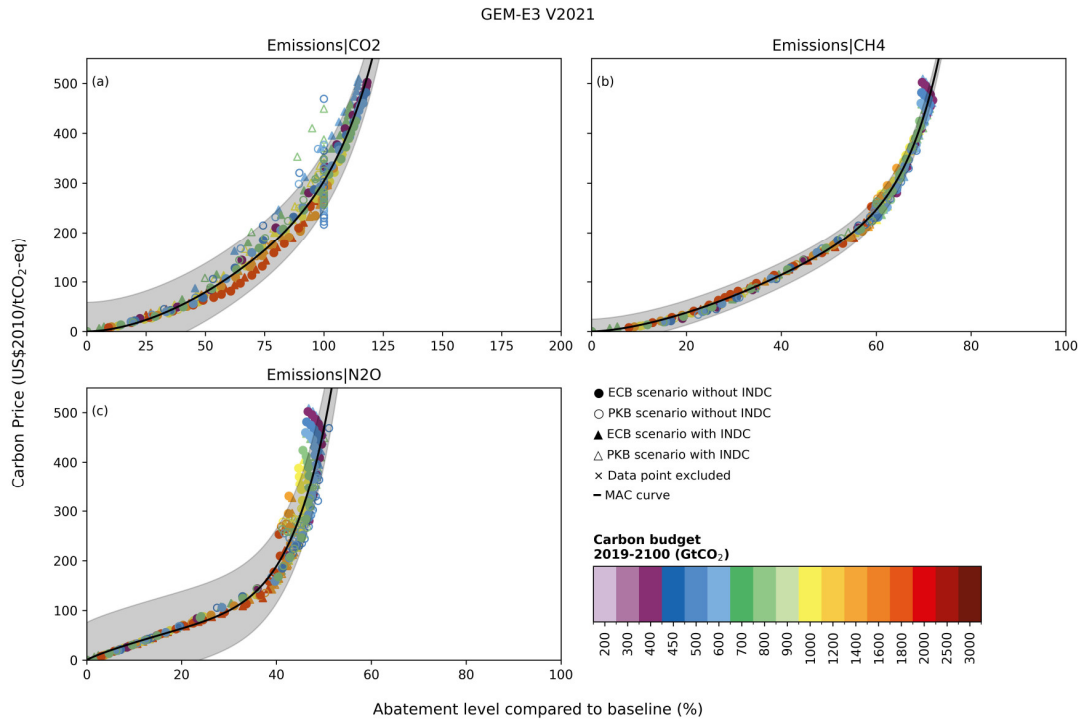

**Figure S15. Global GEM MAC curves**

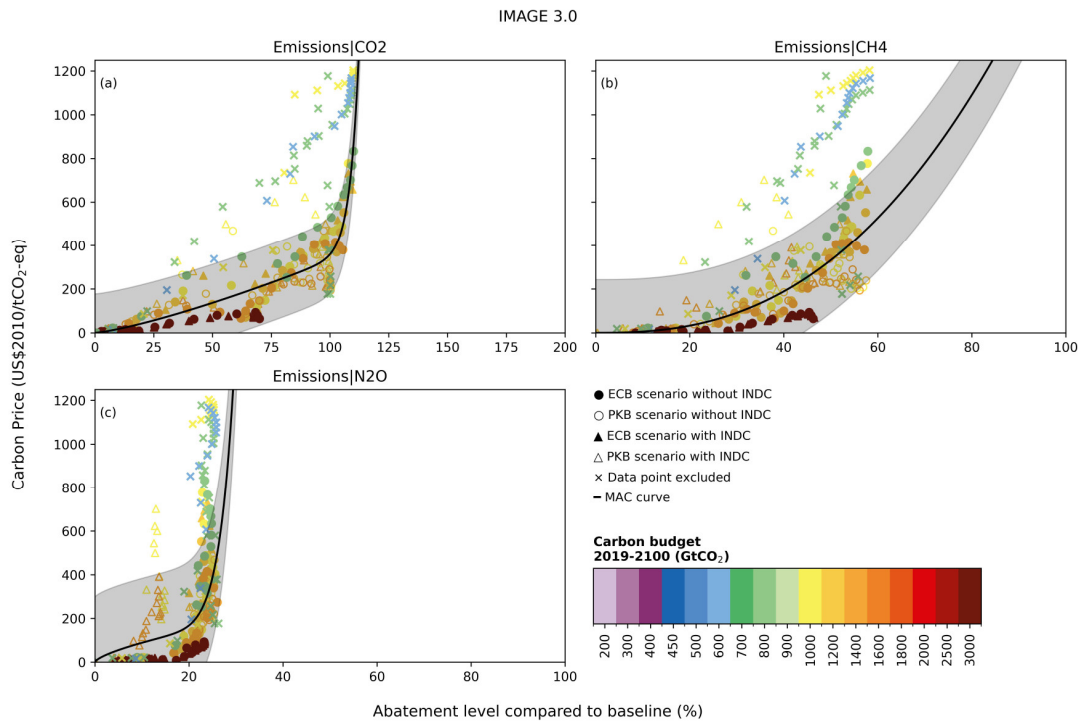

**Figure S16. Global IMAGE MAC curves**

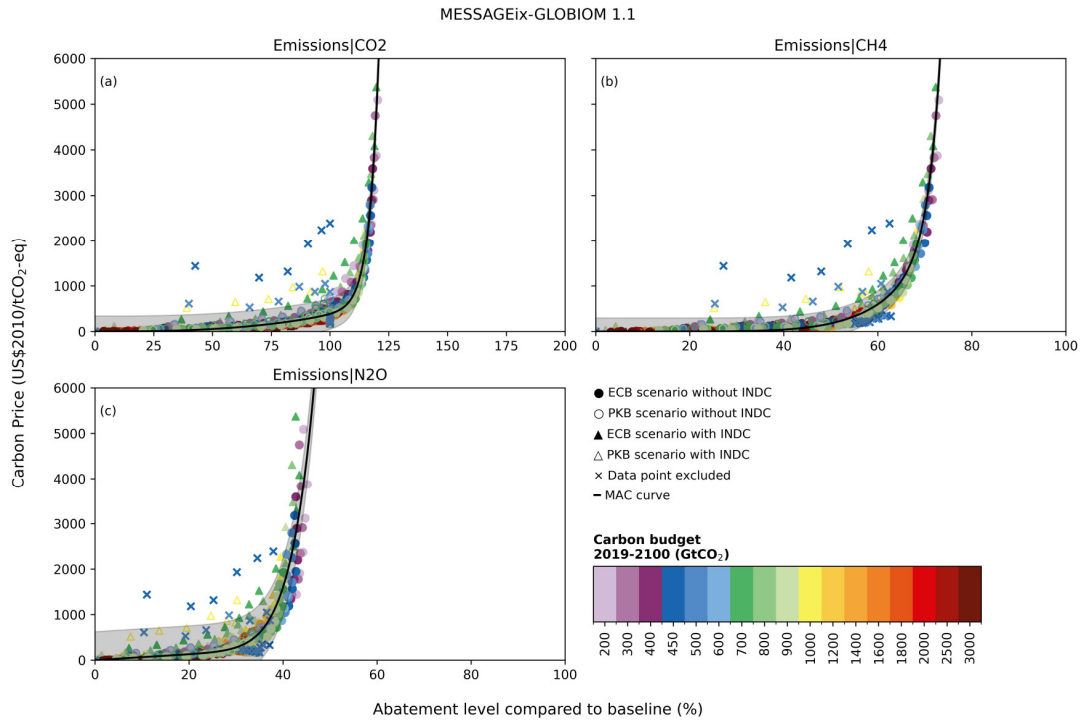

**Figure S17. Global MESSAGE MAC curves**

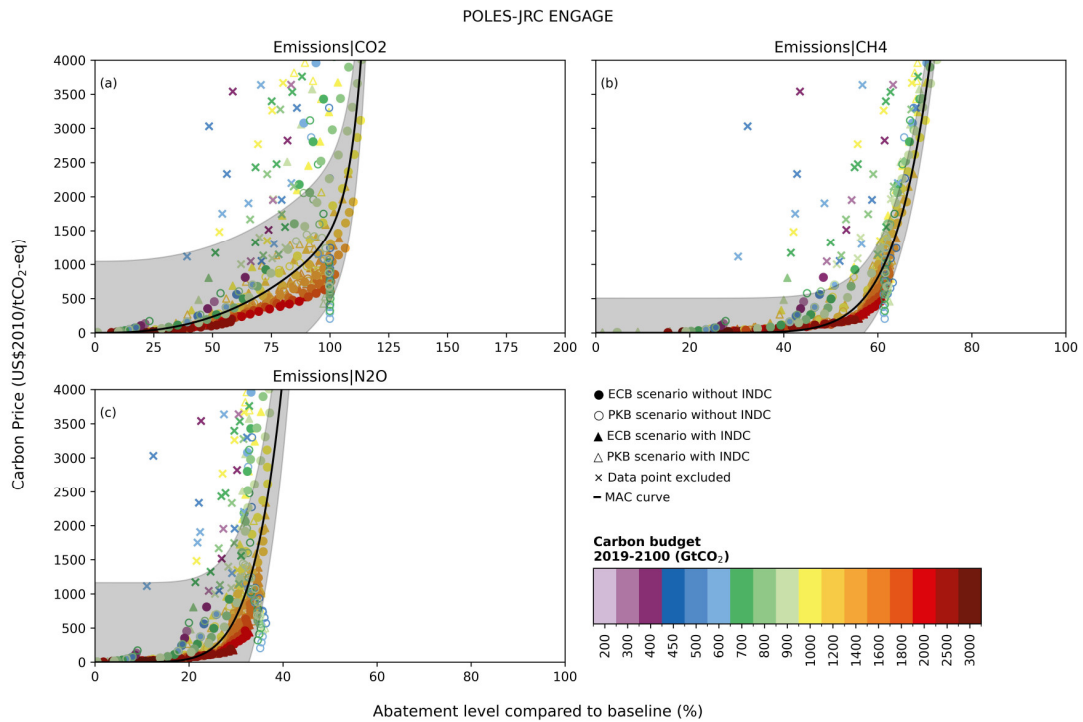

**Figure S18. Global POLES MAC curves**



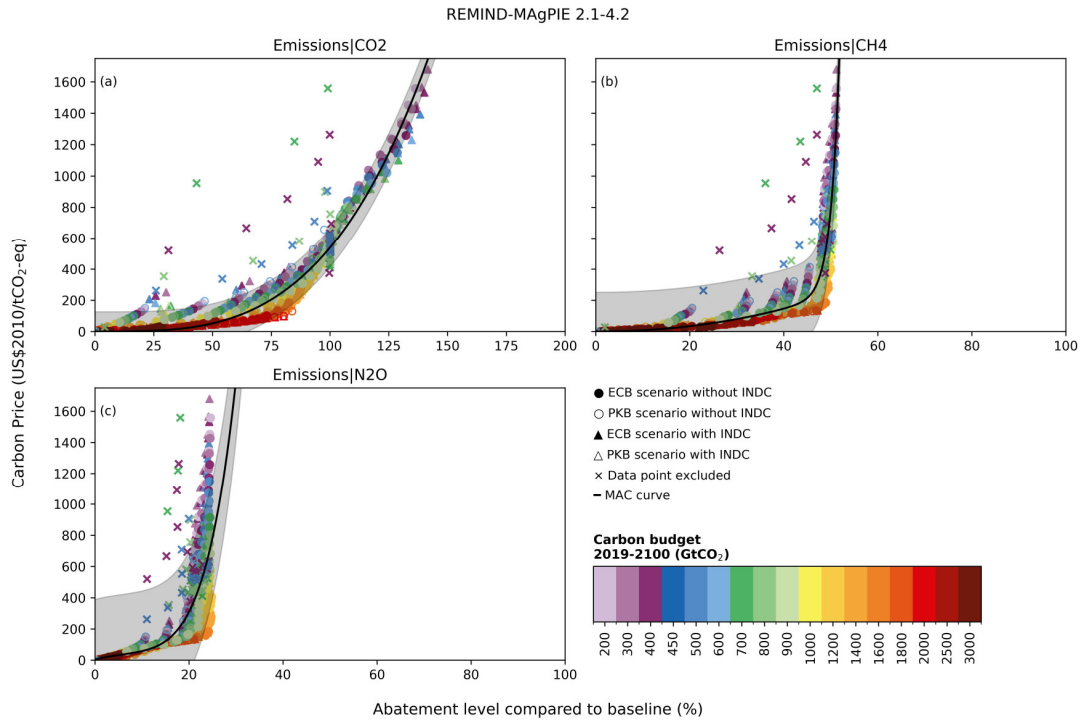

**Figure S19. Global REMIND MAC curves**

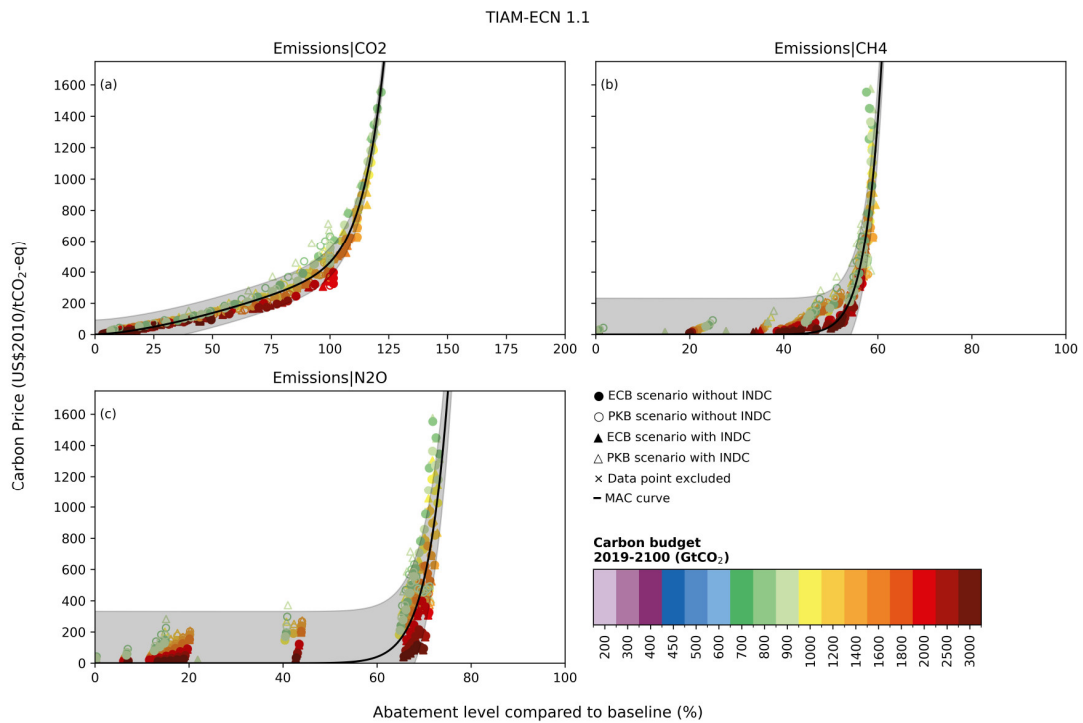

**Figure S20. Global TIAM MAC curves**

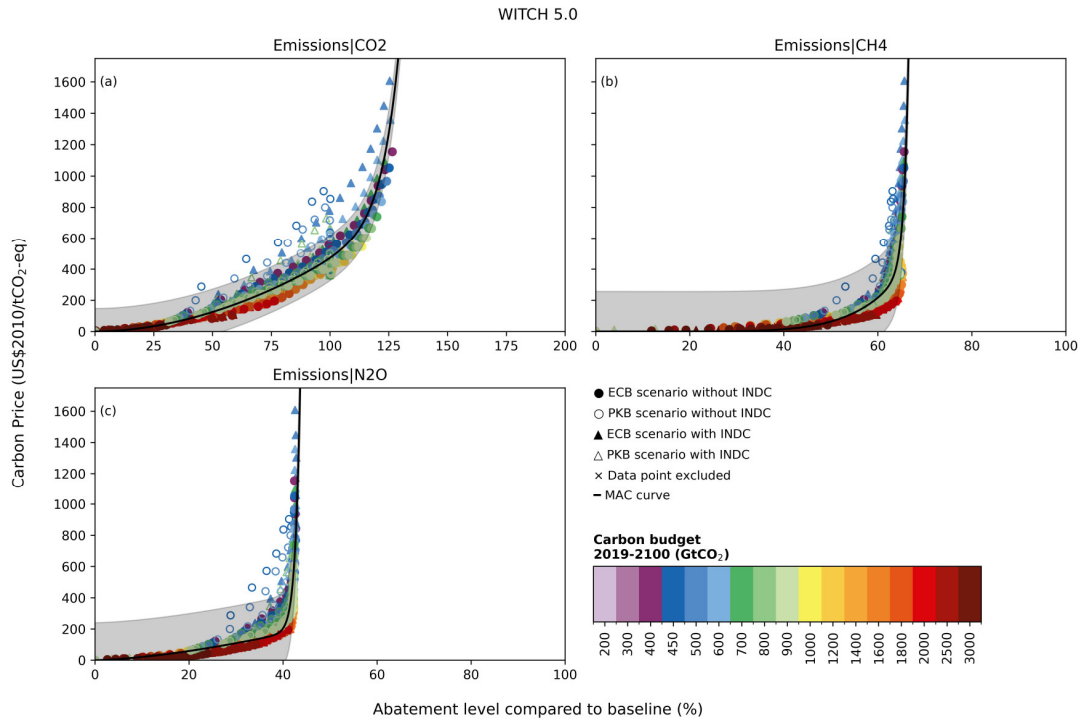

**Figure S21. Global WITCH MAC curves**

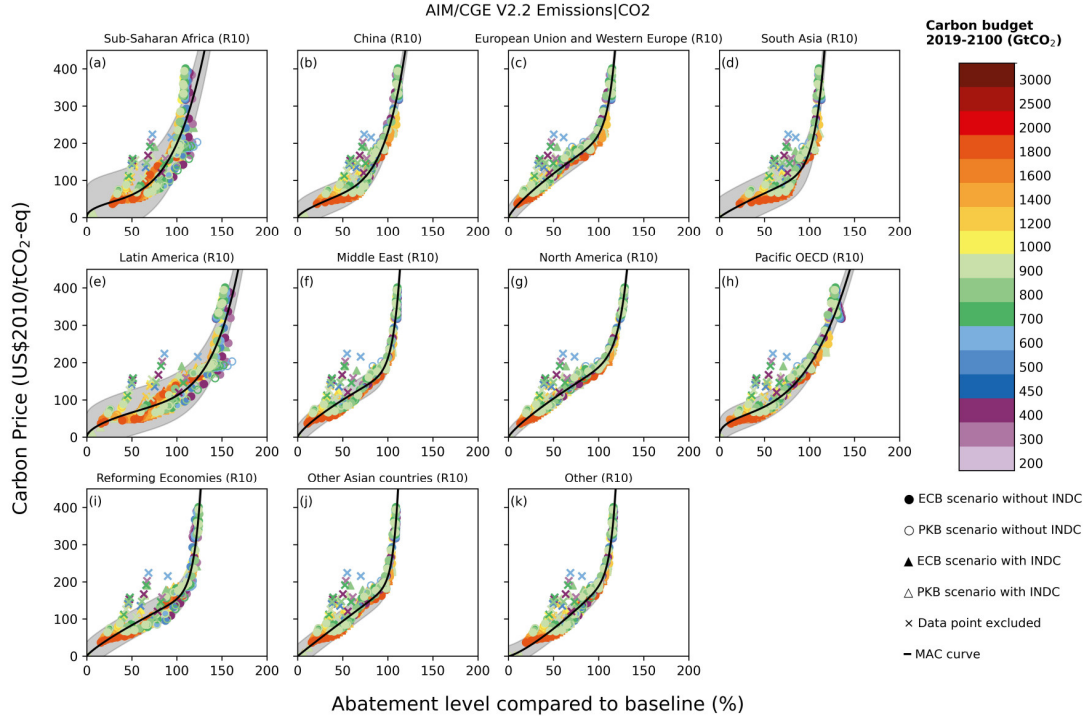

**Figure S22. Regional AIM total anthropogenic CO<sub>2</sub> MAC curves**

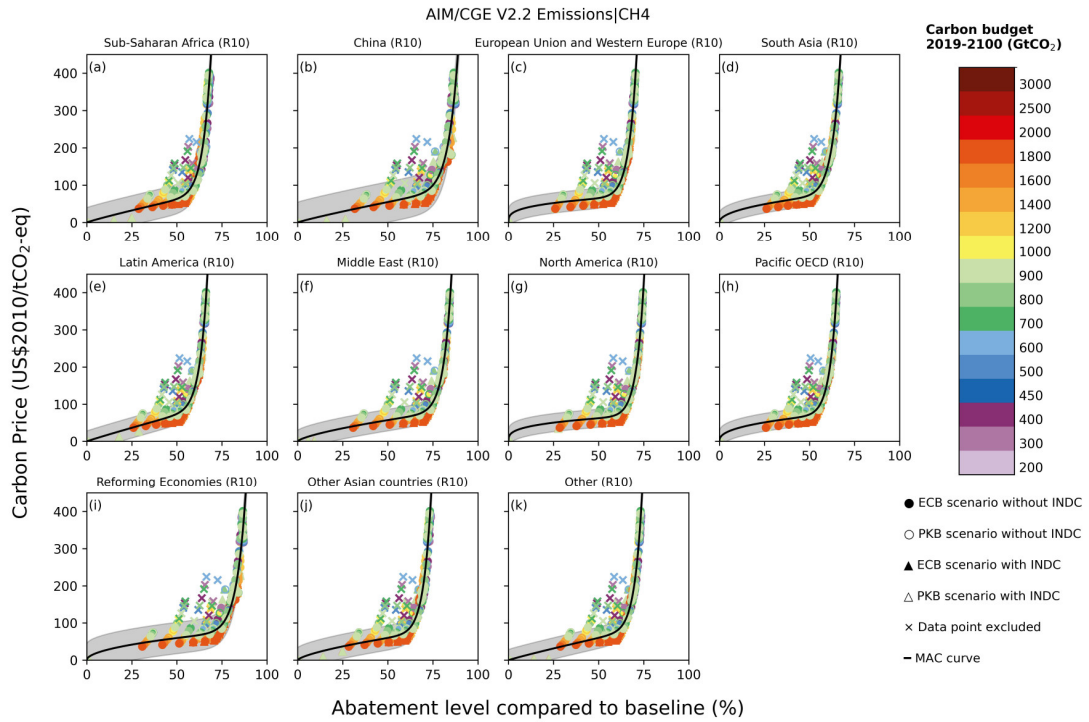

**Figure S23. Regional AIM total anthropogenic CH<sub>4</sub> MAC curves**

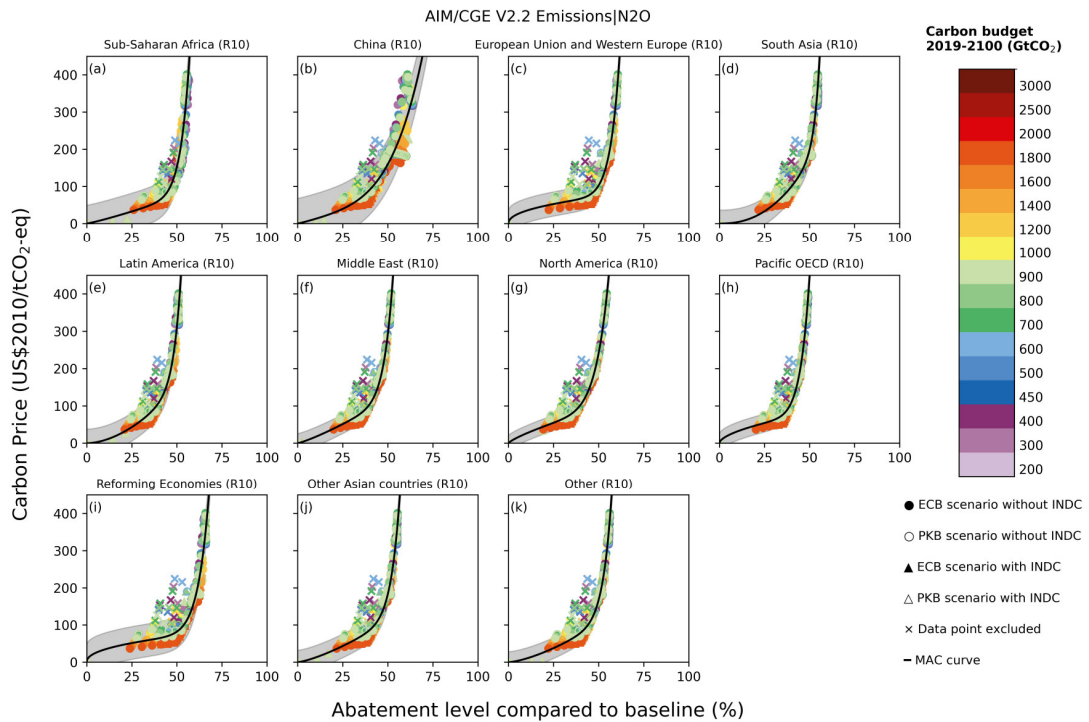

**Figure S24. Regional AIM total anthropogenic N<sub>2</sub>O MAC curves**

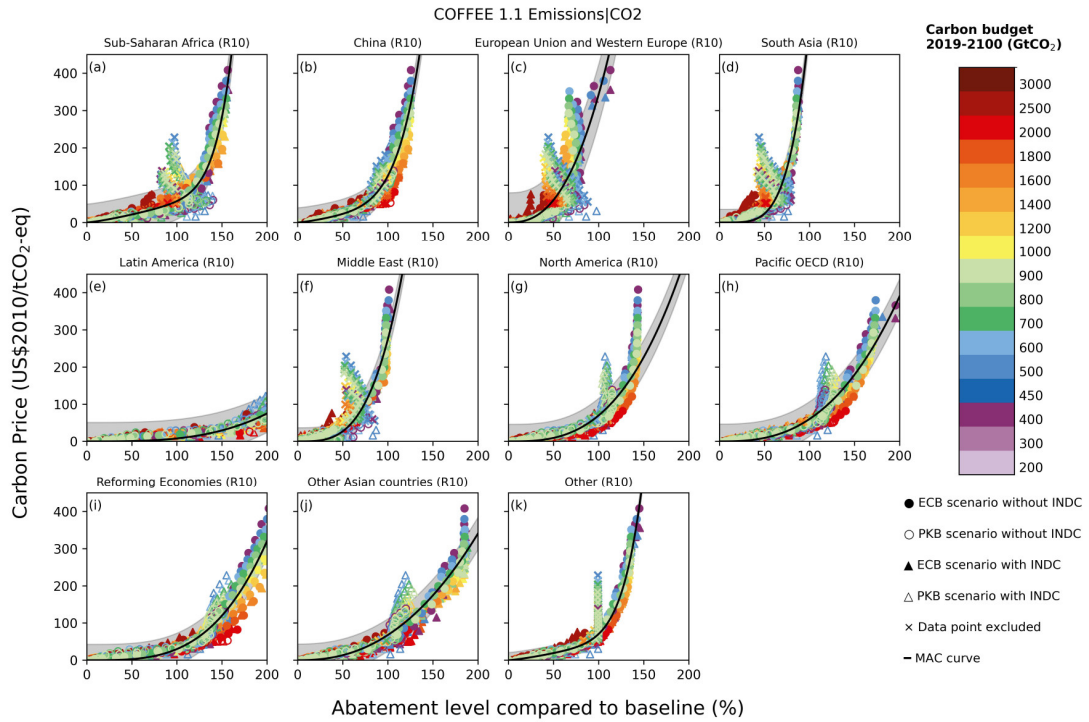

**Figure S25. Regional COFFEE total anthropogenic CO<sub>2</sub> MAC curves**

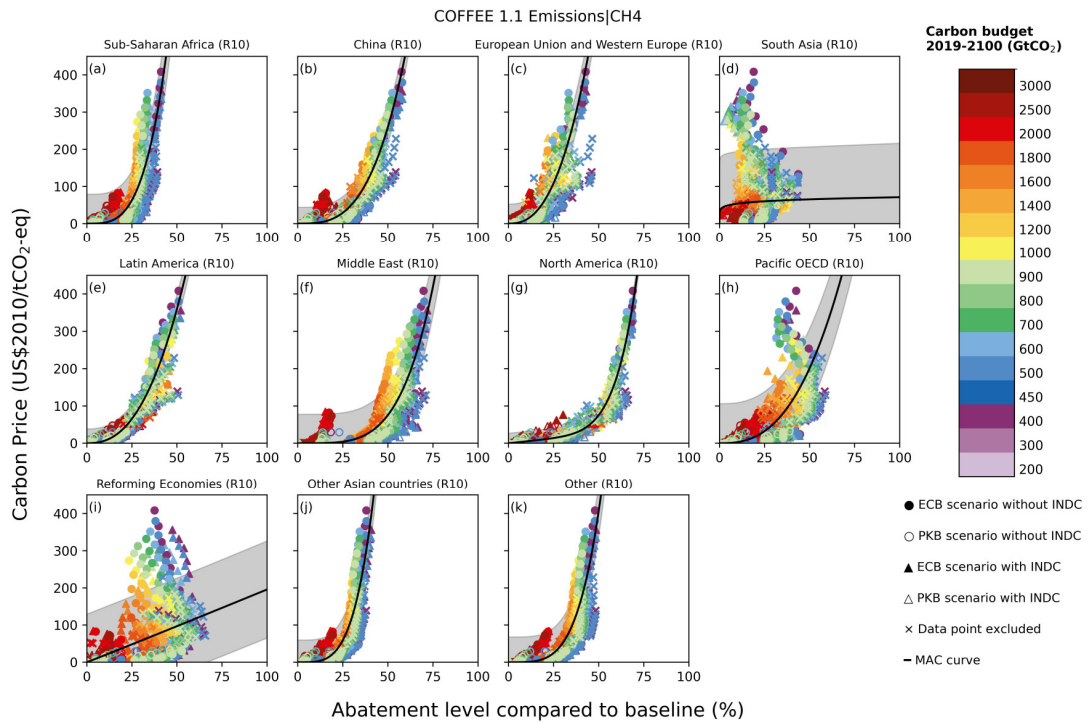

**Figure S26. Regional COFFEE total anthropogenic CH<sub>4</sub> MAC curves**

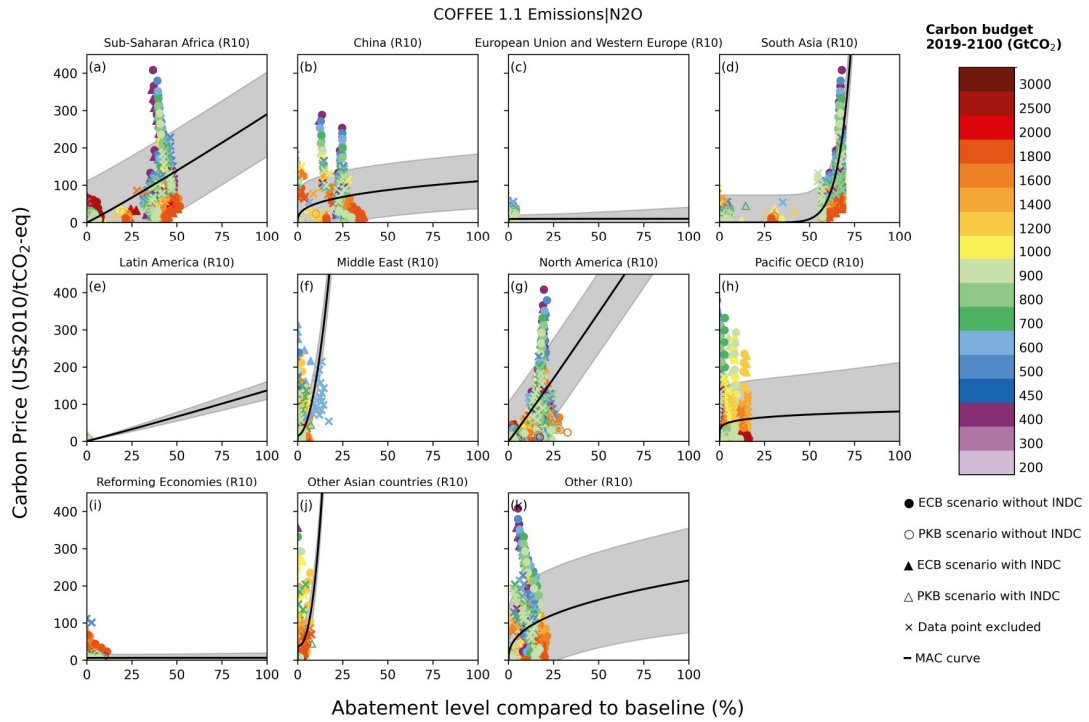

**Figure S27. Regional COFFEE total anthropogenic N<sub>2</sub>O MAC curves**

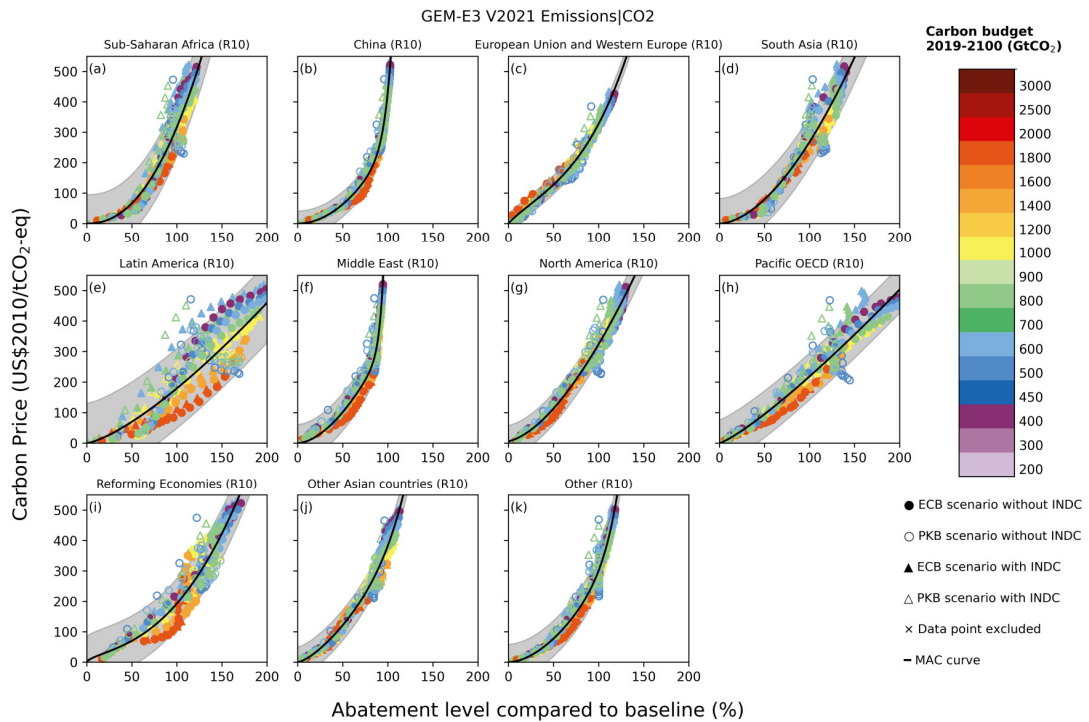

**Figure S28. Regional GEM total anthropogenic CO<sub>2</sub> MAC curves**

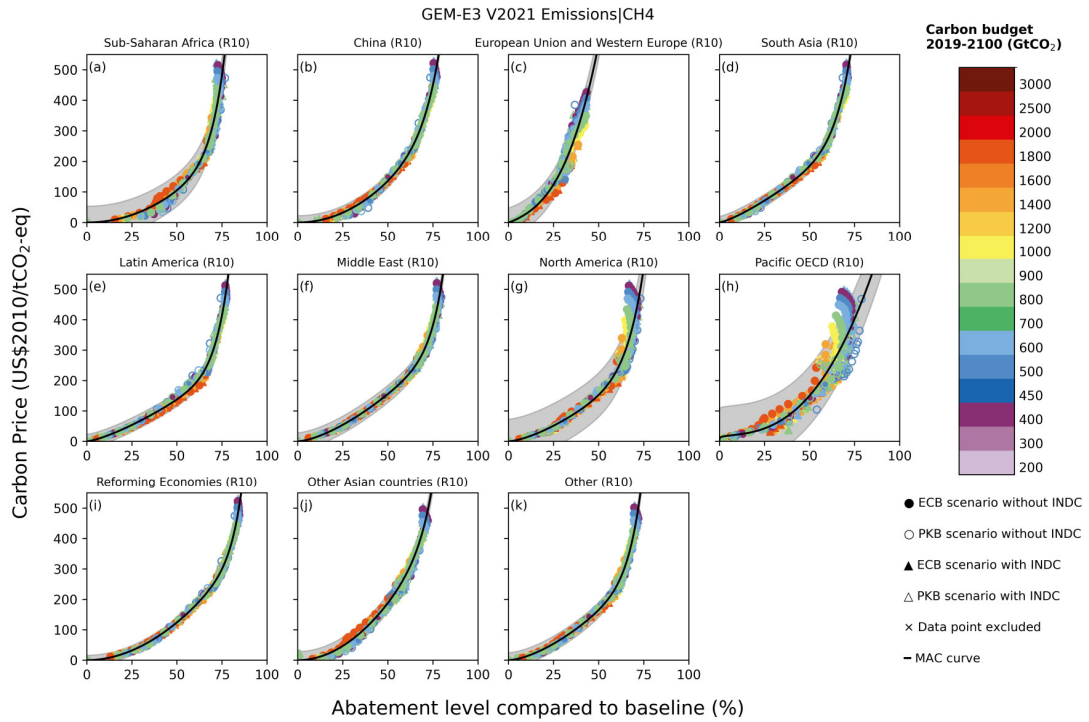

**Figure S29. Regional GEM total anthropogenic CH<sub>4</sub> MAC curves**

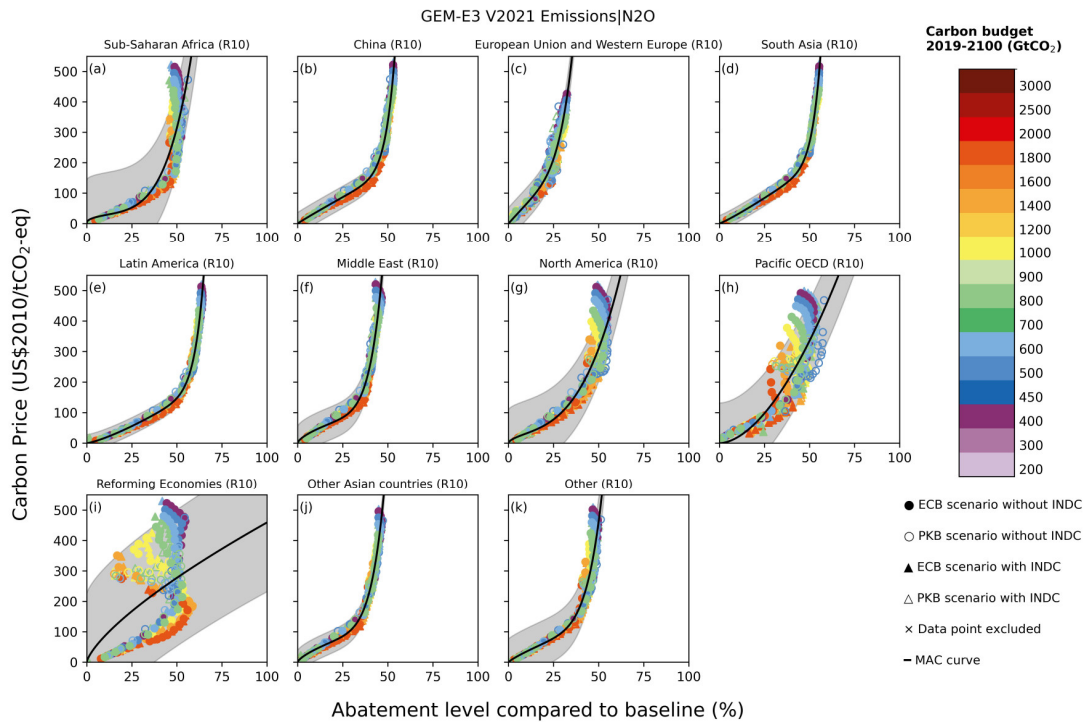

**Figure S30. Regional GEM total anthropogenic N<sub>2</sub>O MAC curves**



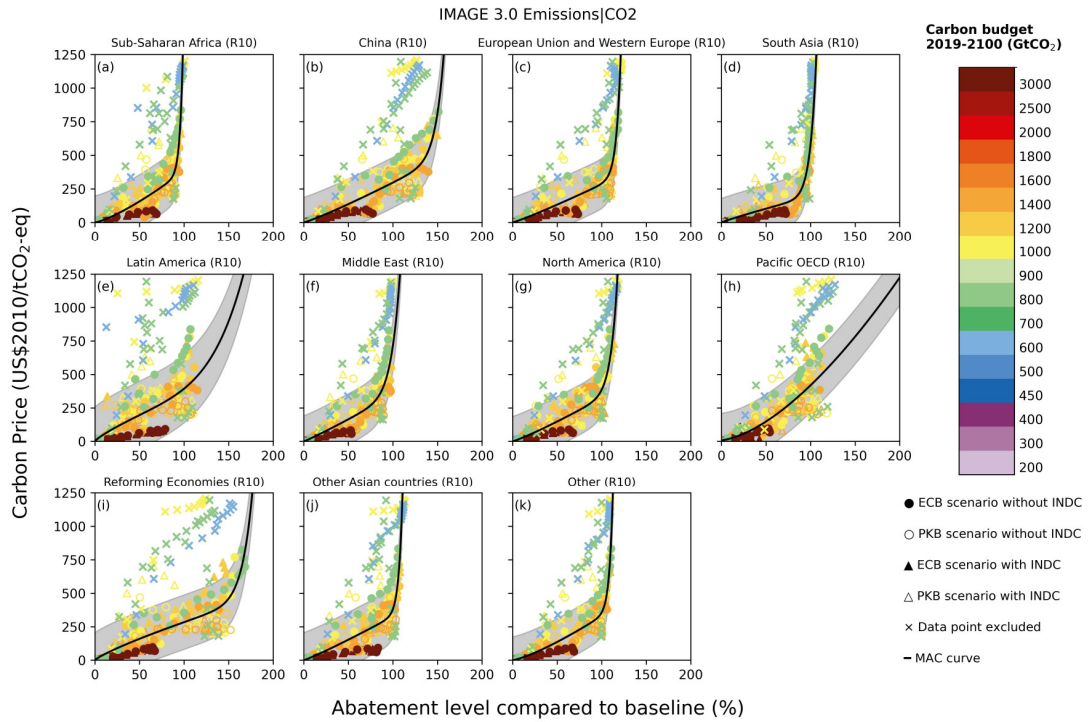

**Figure S31. Regional IMAGE total anthropogenic CO<sub>2</sub> MAC curves**

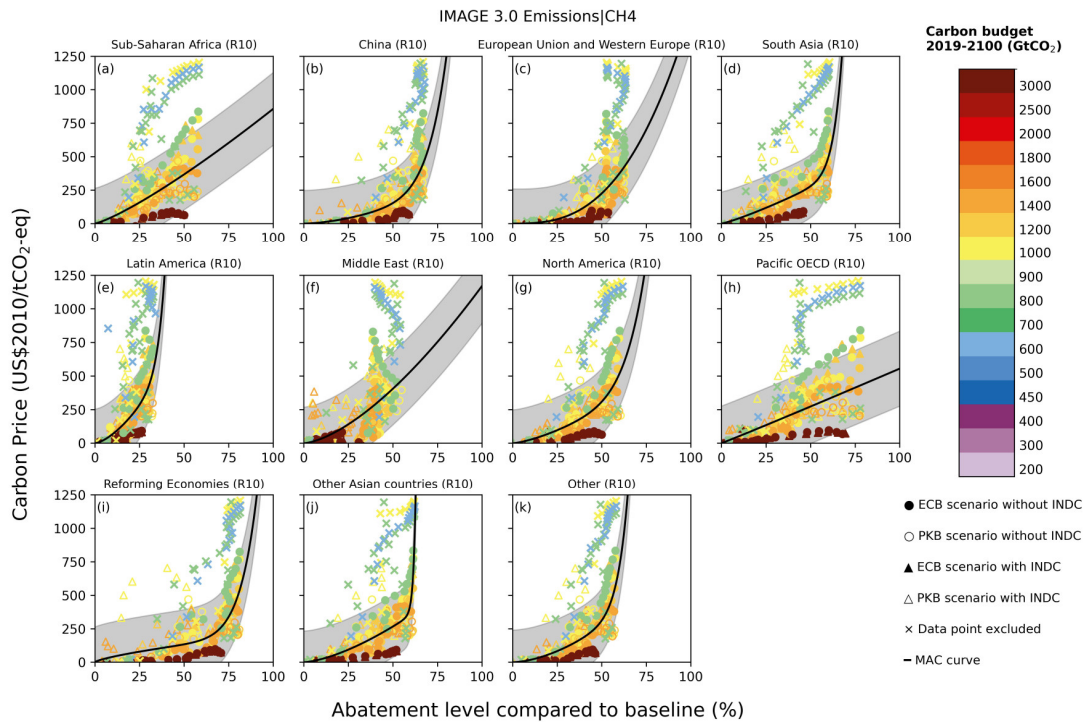

**Figure S32. Regional IMAGE total anthropogenic CH<sub>4</sub> MAC curves**

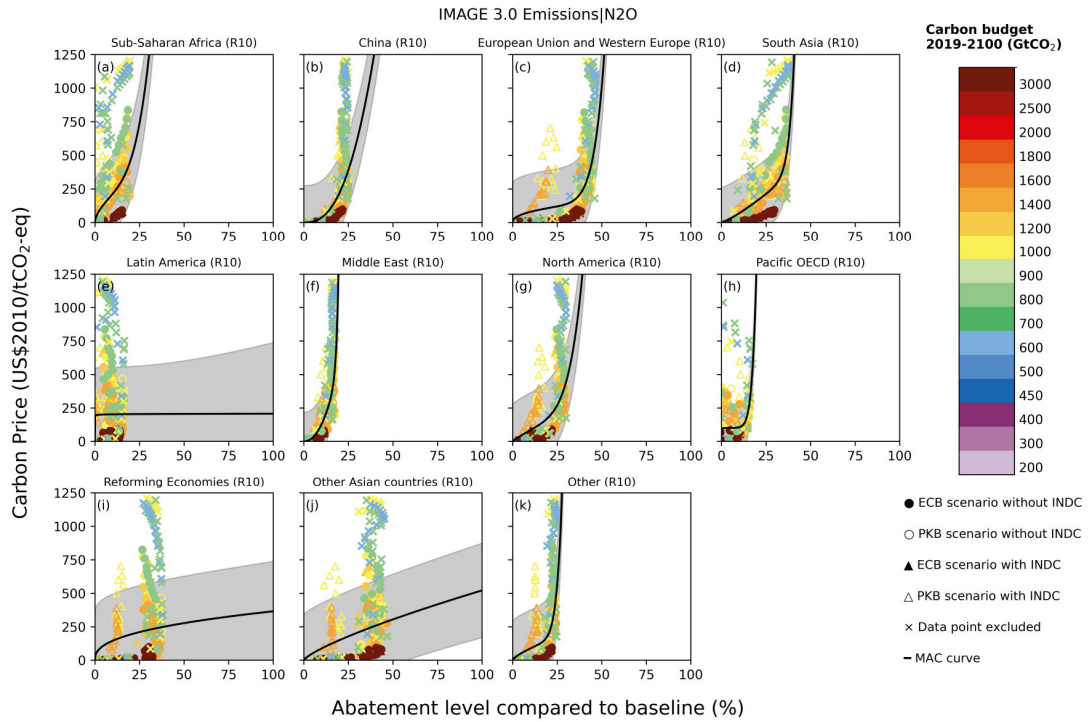

**Figure S33. Regional IMAGE total anthropogenic N<sub>2</sub>O MAC curves**

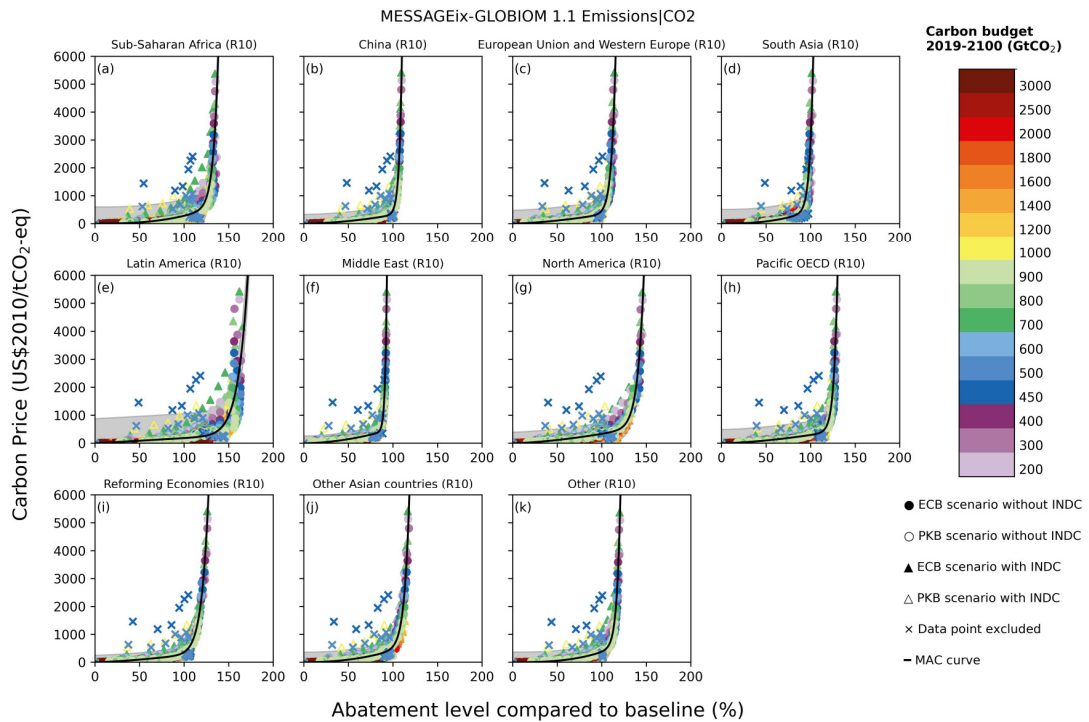

**Figure S34. Regional MESSAGE total anthropogenic CO<sub>2</sub> MAC curves**



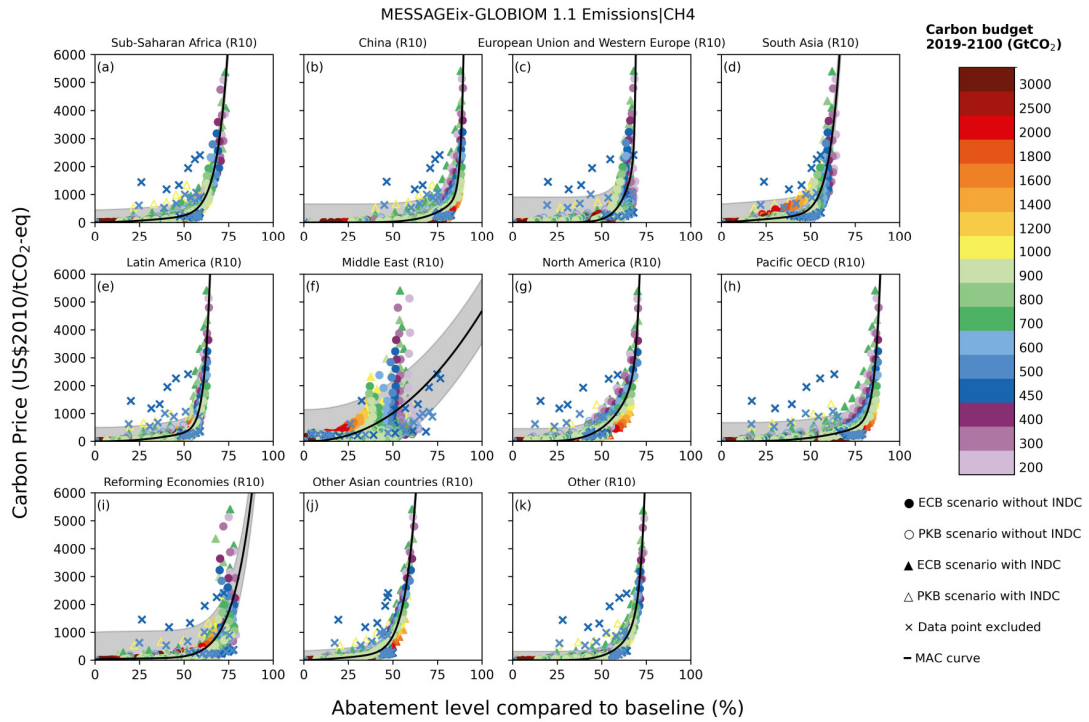

**Figure S35. Regional MESSAGE total anthropogenic CH<sub>4</sub> MAC curves**

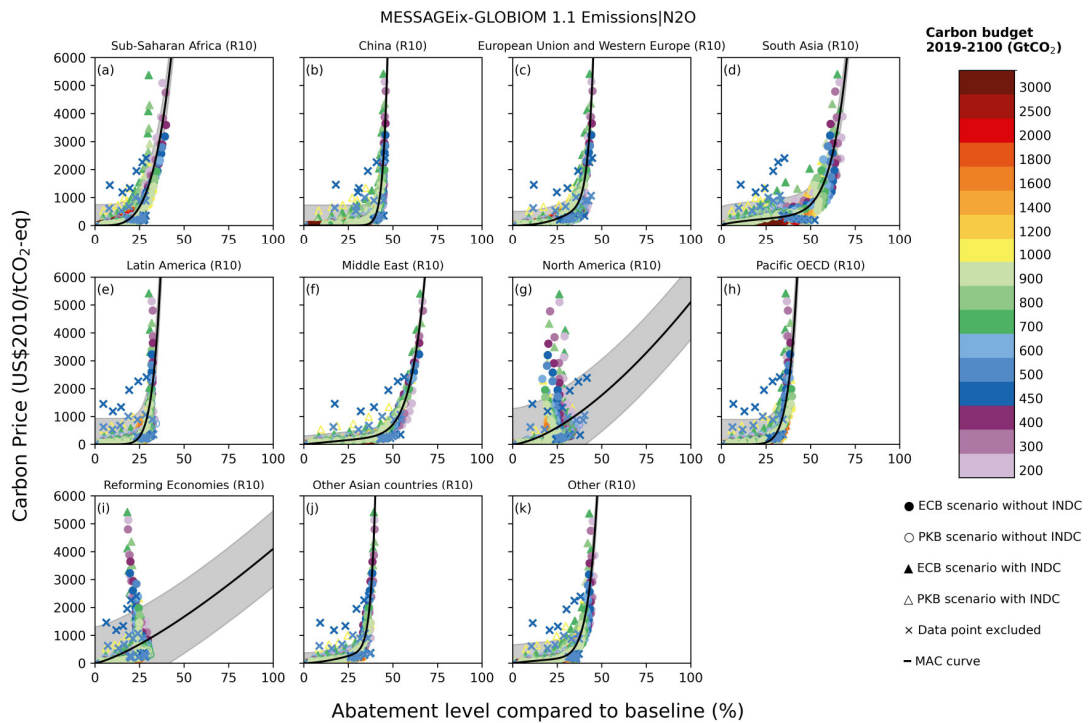

**Figure S36. Regional MESSAGE total anthropogenic N<sub>2</sub>O MAC curves**

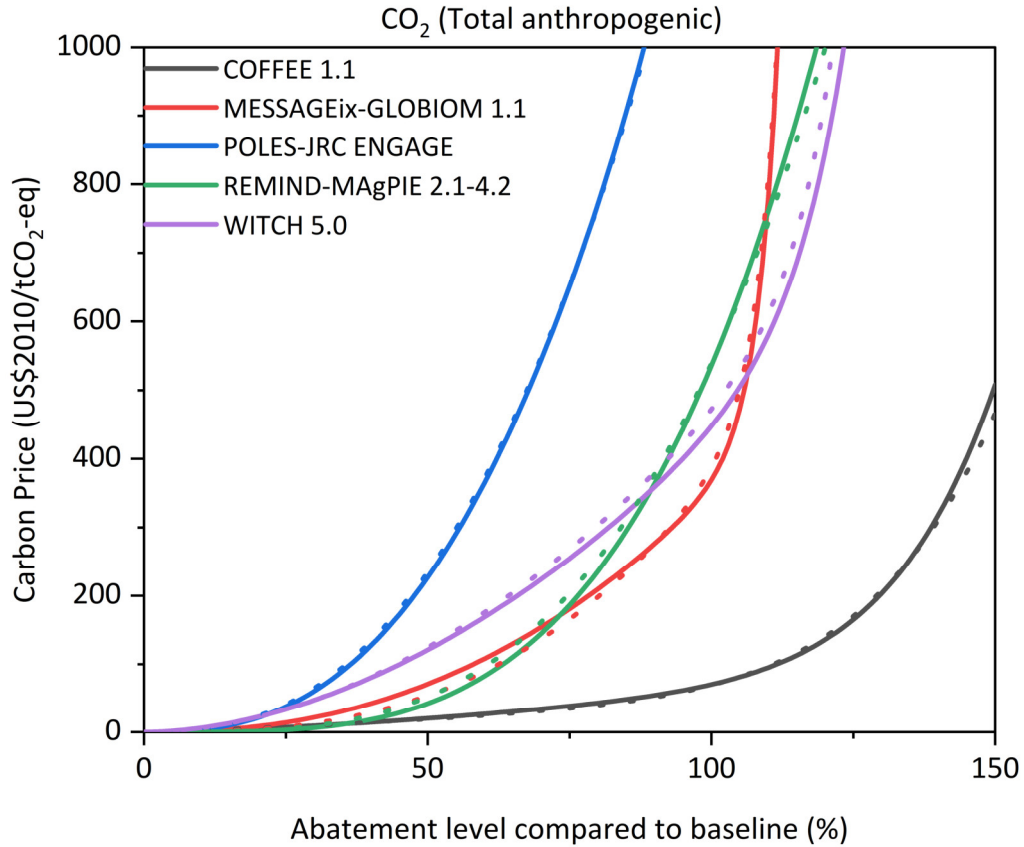

**Figure S37. Global MAC curves for total anthropogenic CO<sub>2</sub> emissions derived from the set of scenarios with the same carbon budgets available for five ENGAGE IAMs**

The solid lines are MAC curves derived from the subsample (a total of 19 scenarios with the same carbon budgets available commonly for all five IAMs (Table S7)), and the dotted lines are MAC curves derived from the full sample (all scenarios available for each IAM). No upper limit of abatement level is shown for MAC curves.

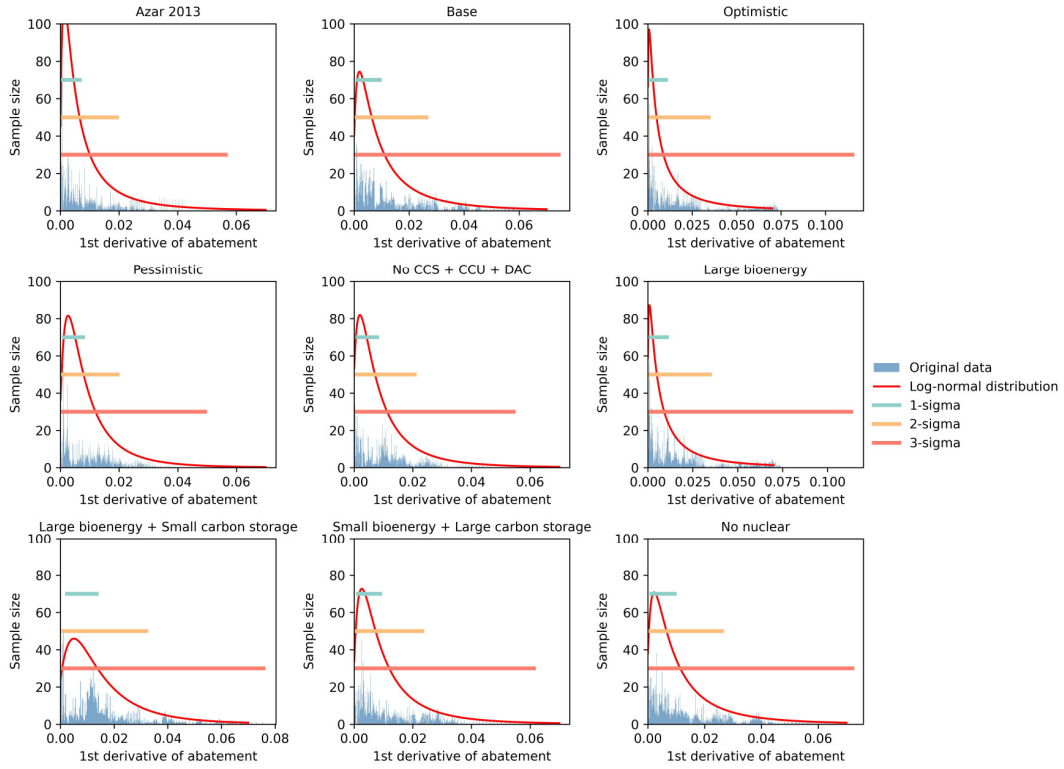

**Figure S38. Global GET - Distribution of first derivative of abatement levels**

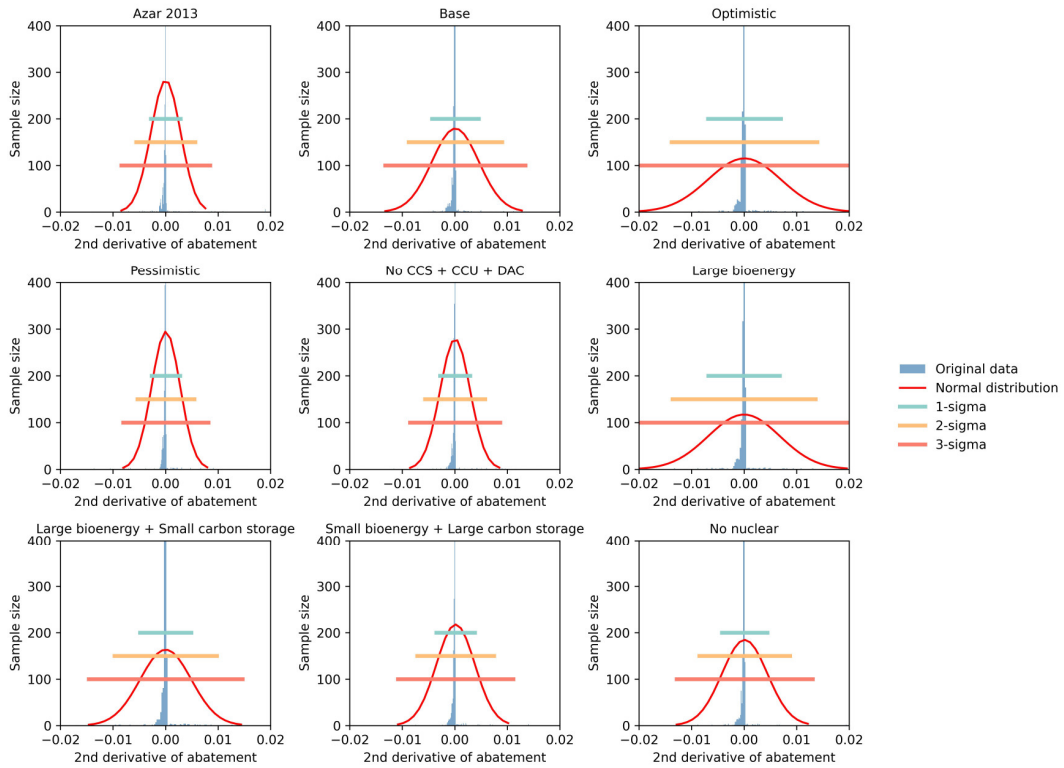

**Figure S39. Global GET - Distribution of second derivative of abatement levels**

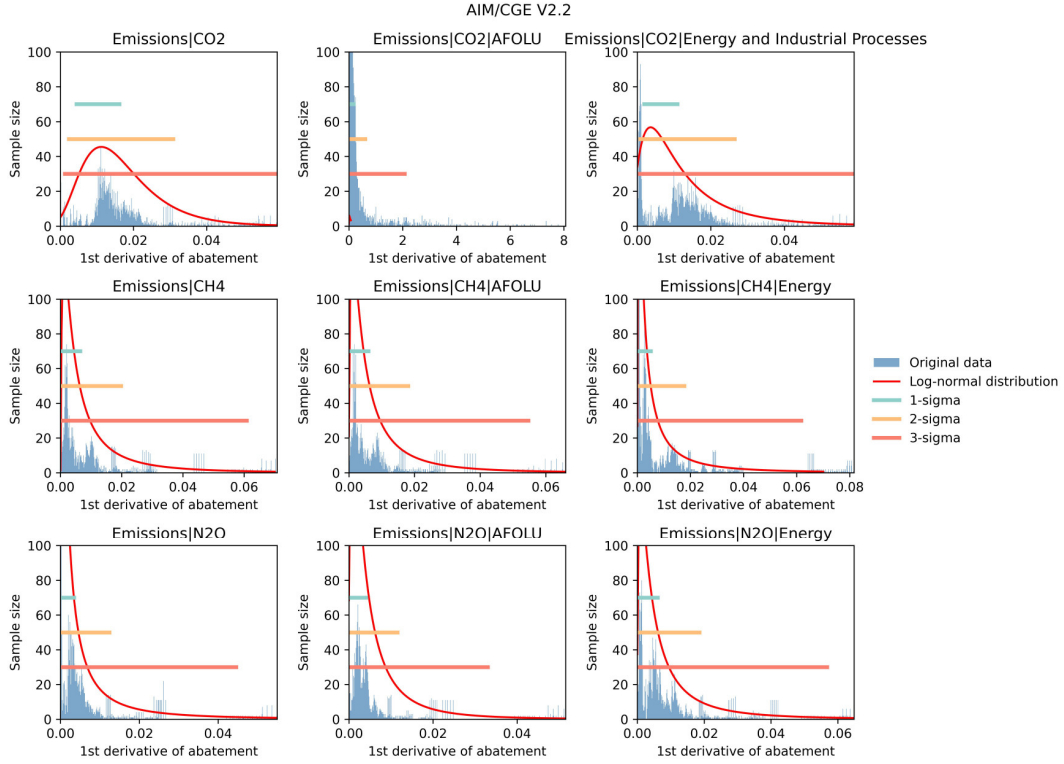

**Figure S40. Global AIM - Distribution of first derivative of abatement levels**

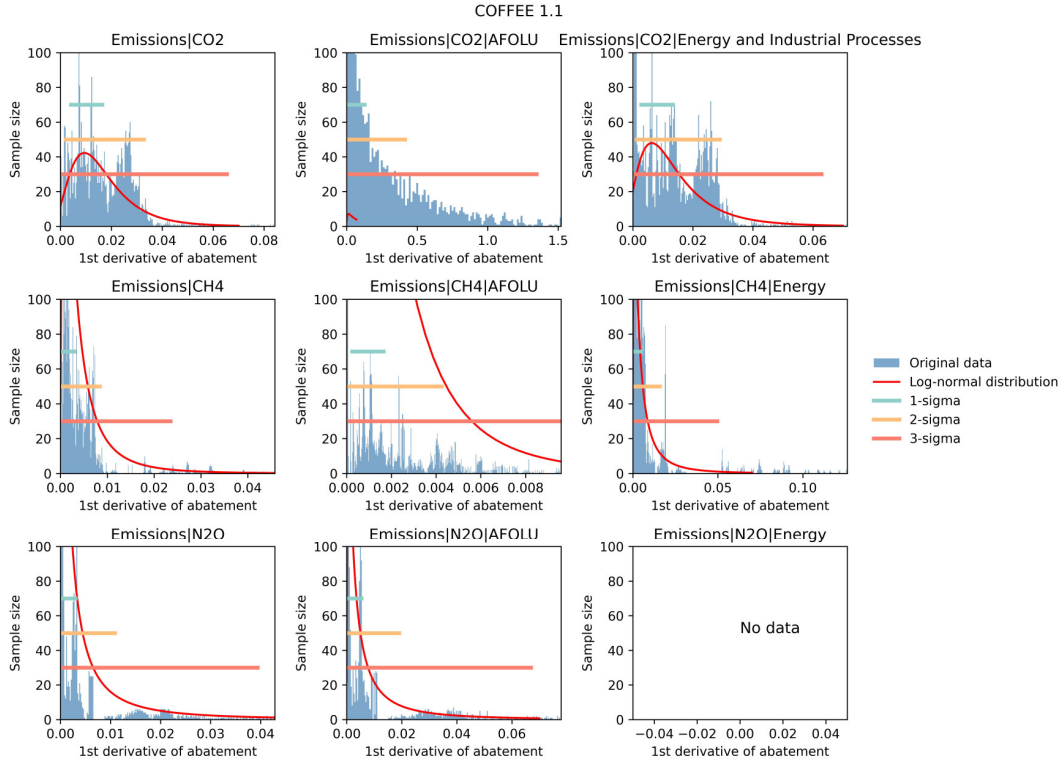

**Figure S41. Global COFFEE - Distribution of first derivative of abatement levels**

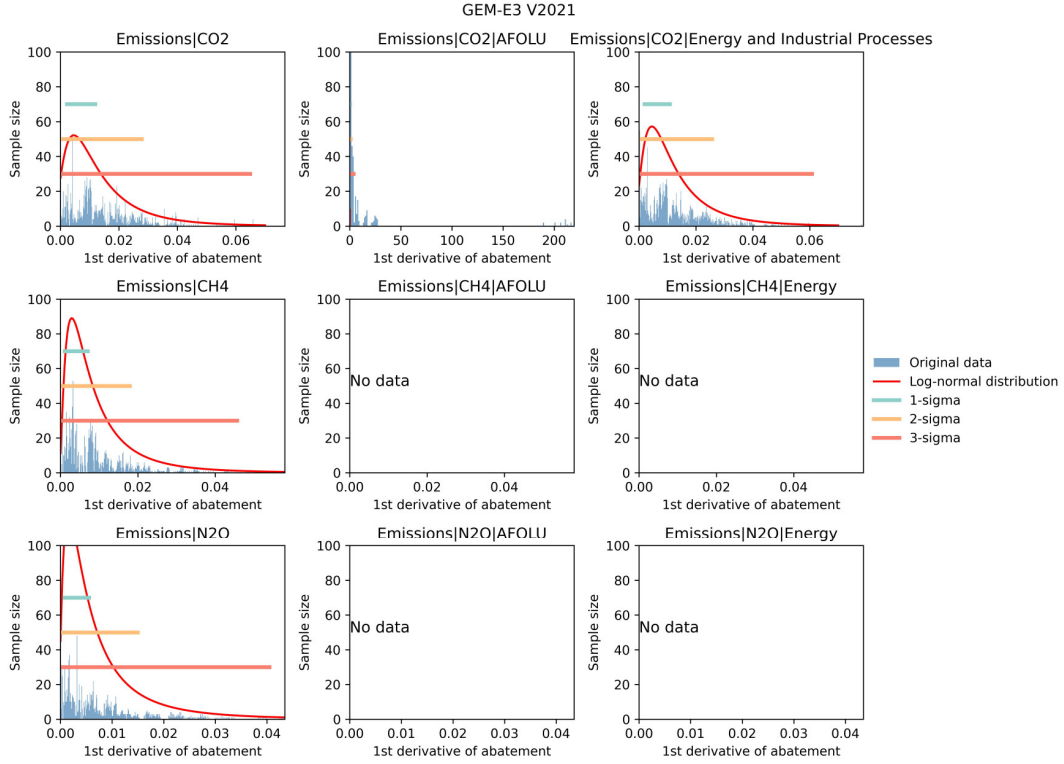

**Figure S42. Global GEM - Distribution of first derivative of abatement levels**

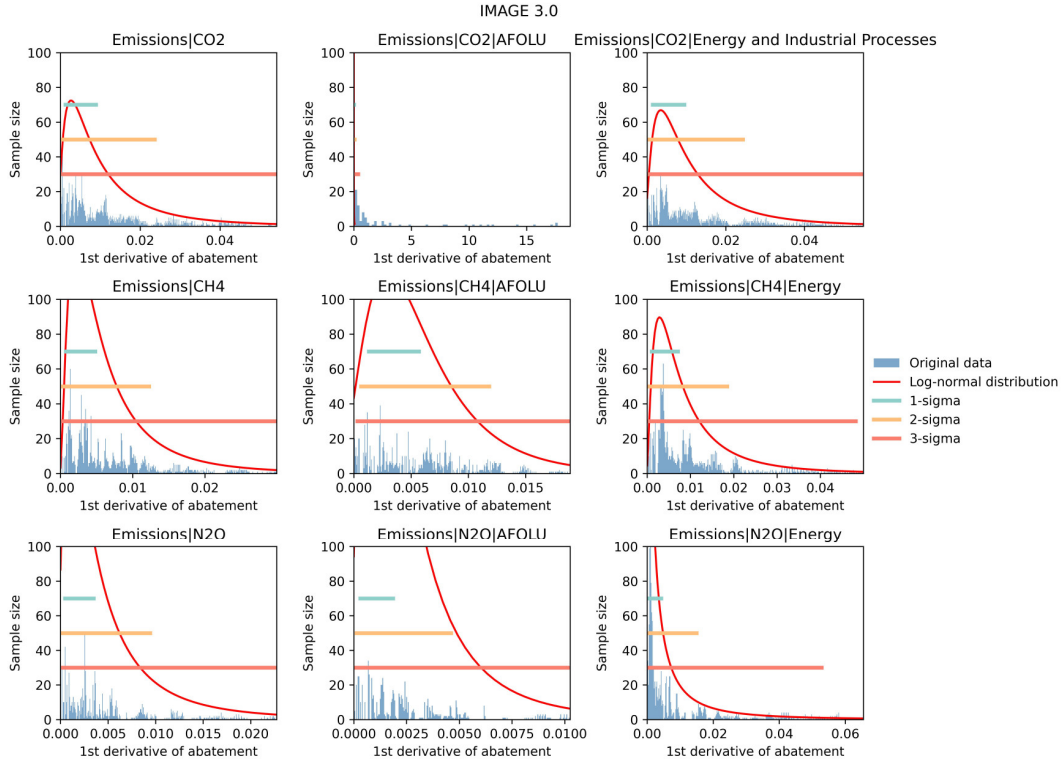

**Figure S43. Global IMAGE - Distribution of first derivative of abatement levels**

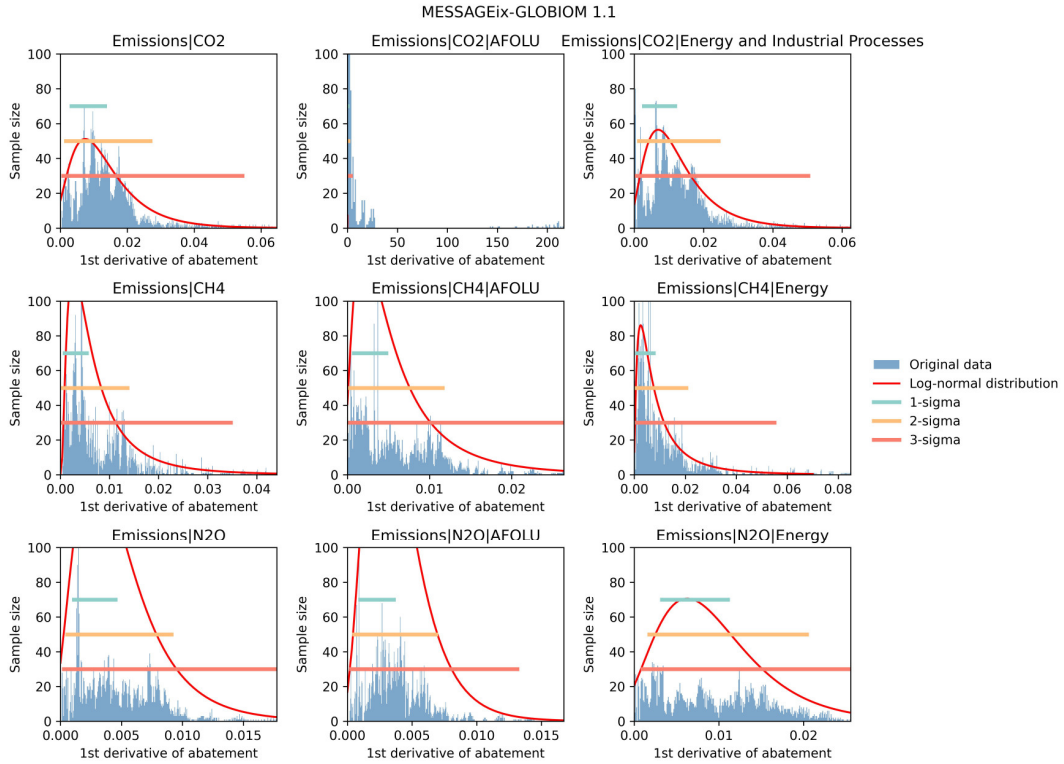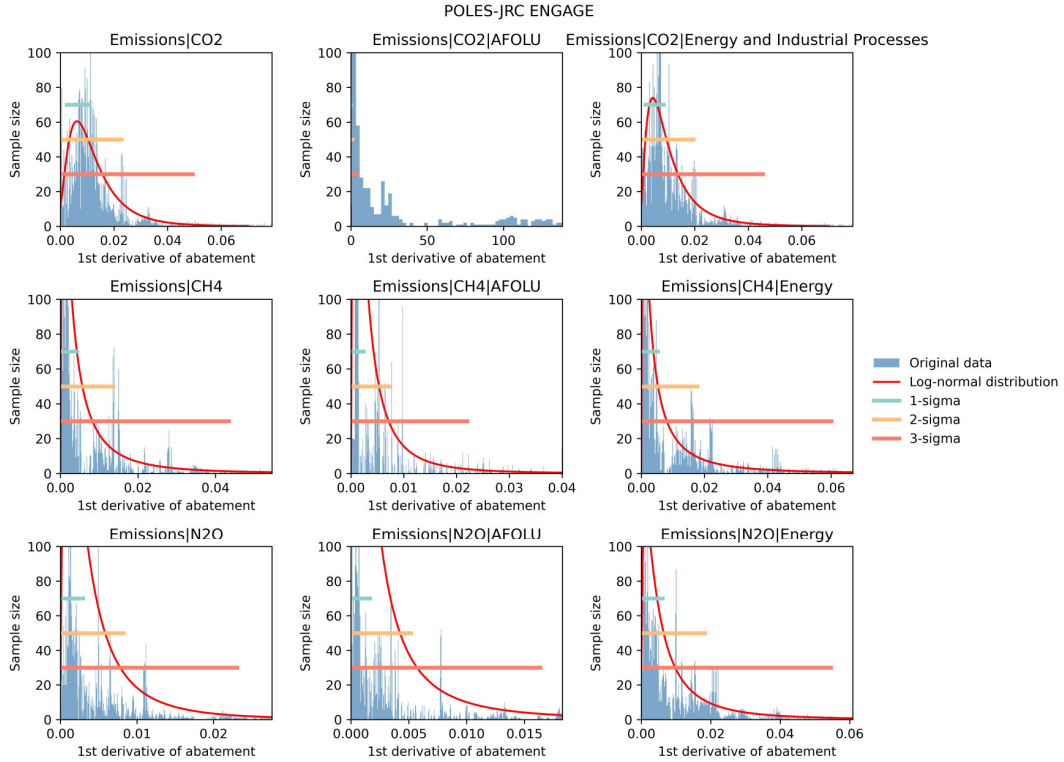



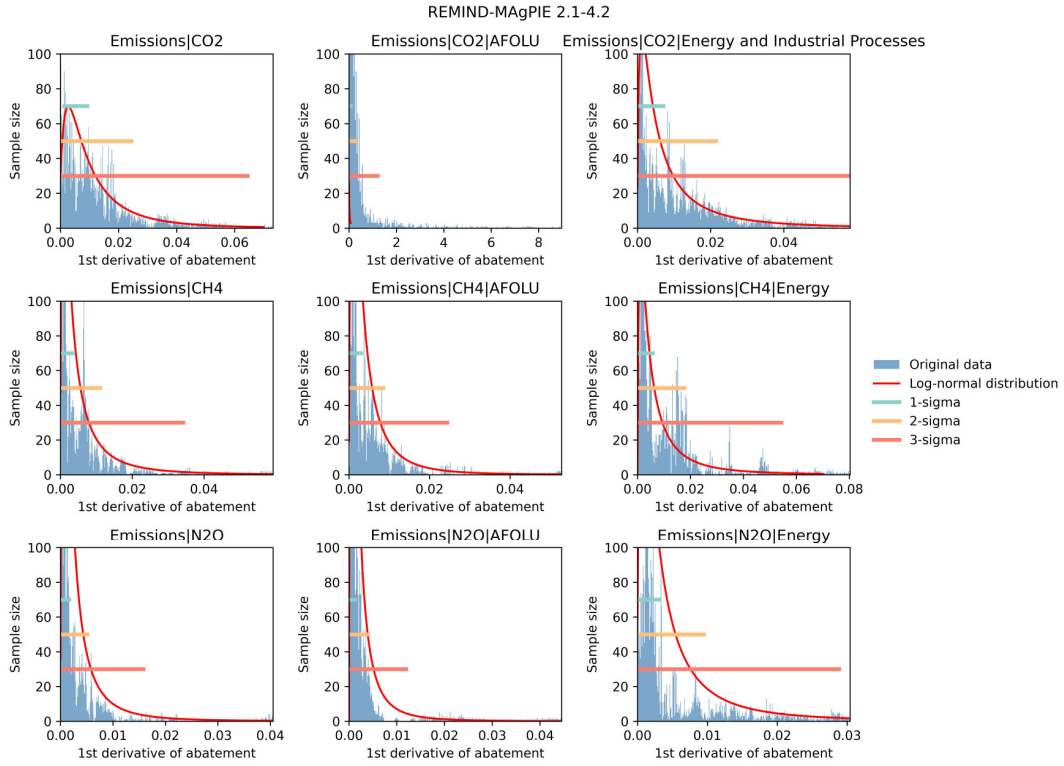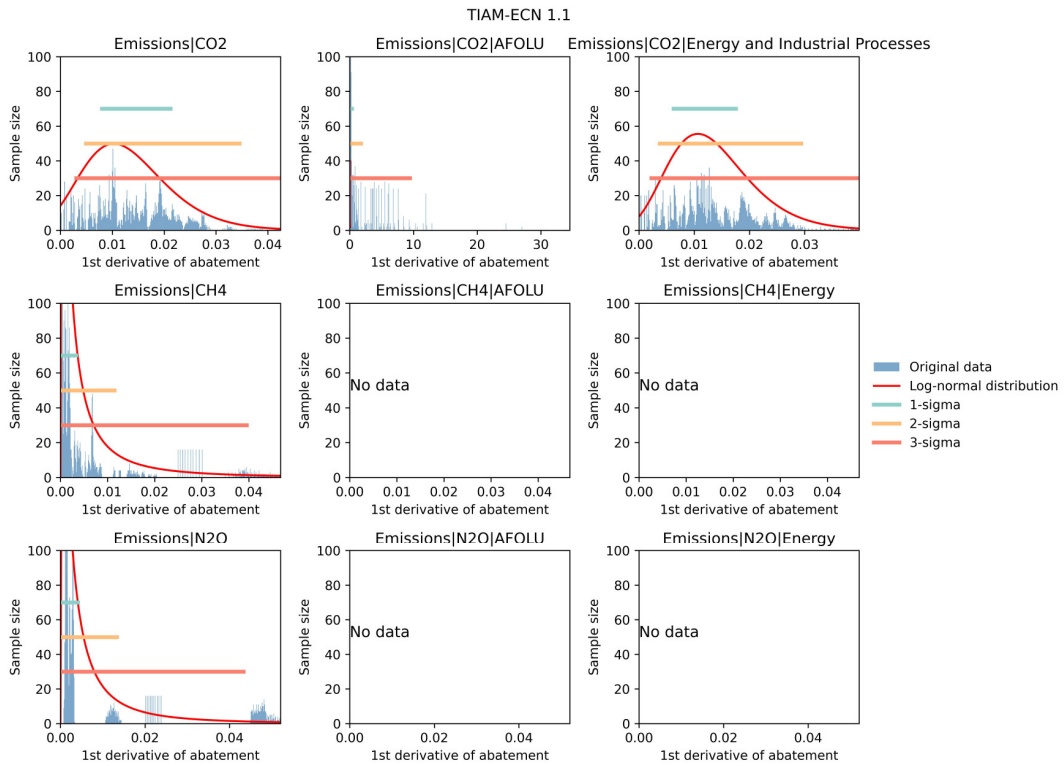

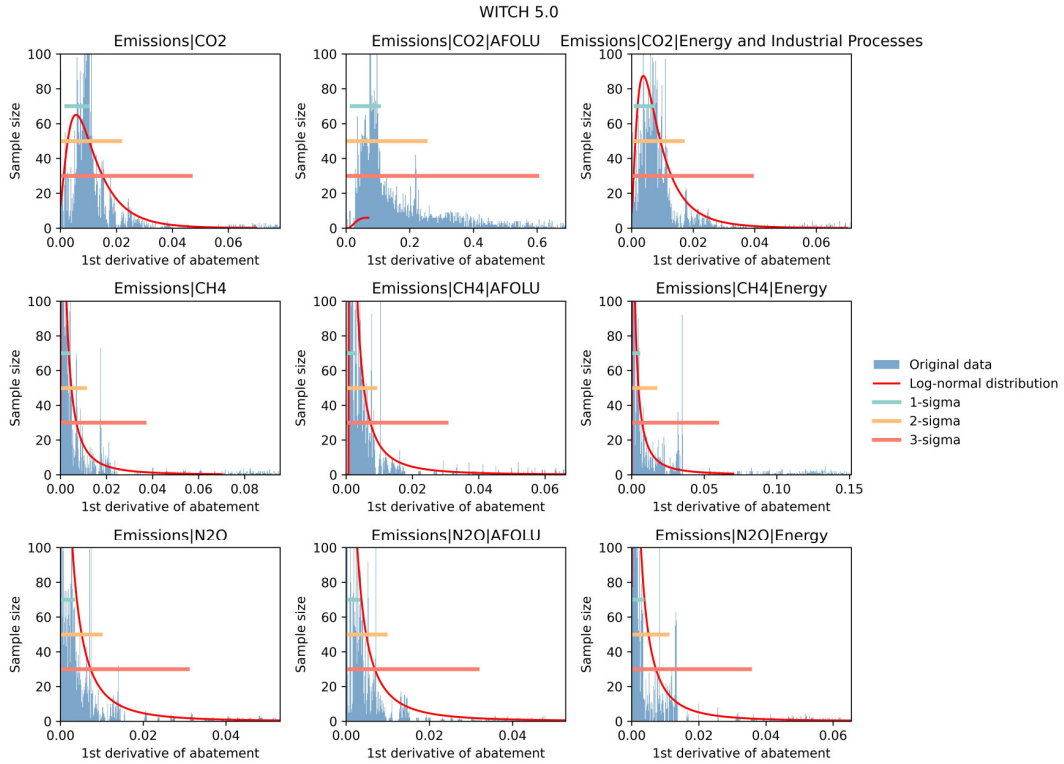

**Figure S48. Global WITCH - Distribution of first derivative of abatement levels**

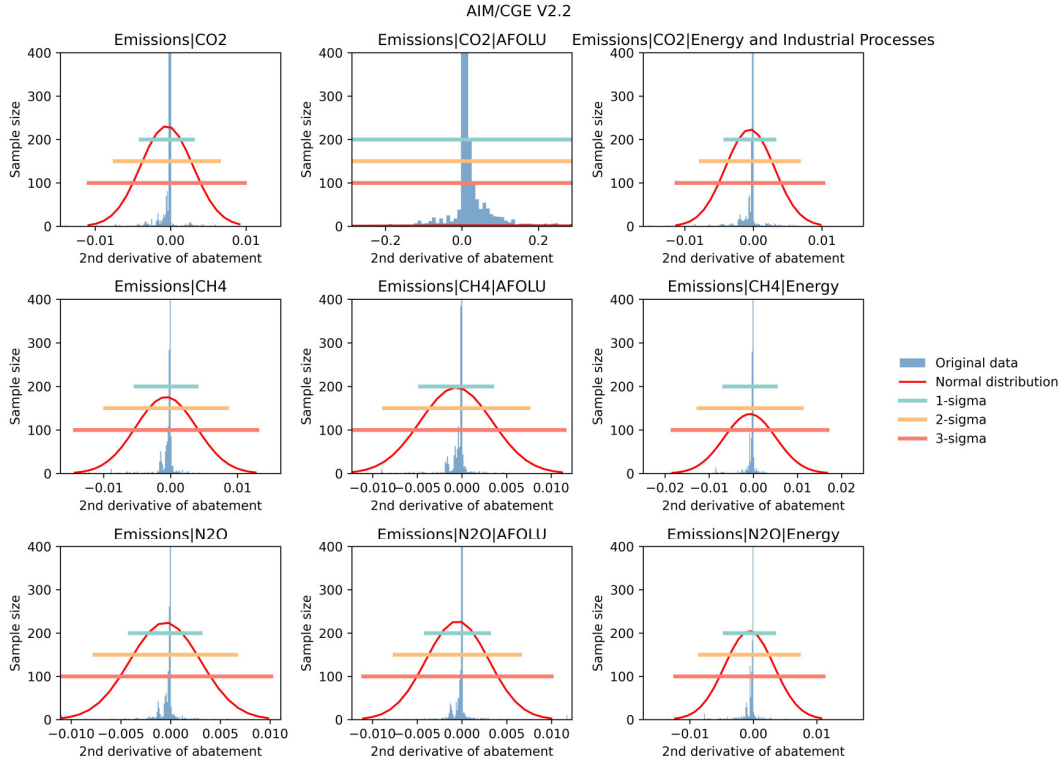

**Figure S49. Global AIM - Distribution of second derivative of abatement levels**



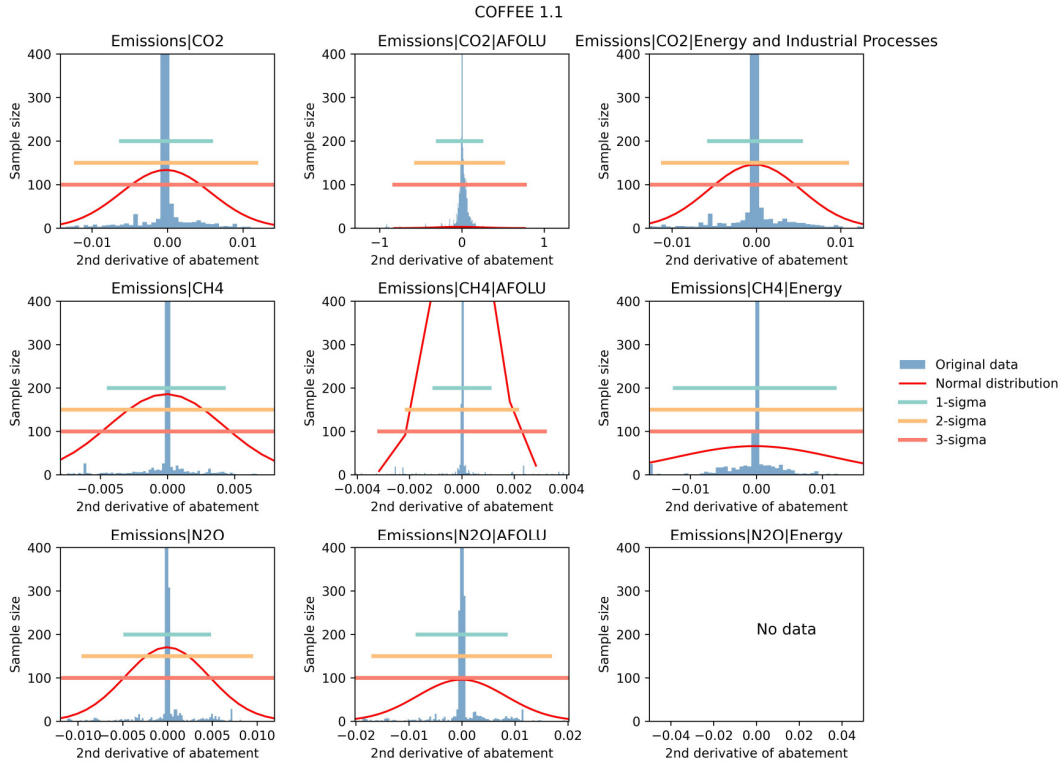

**Figure S50. Global COFFEE - Distribution of second derivative of abatement levels**

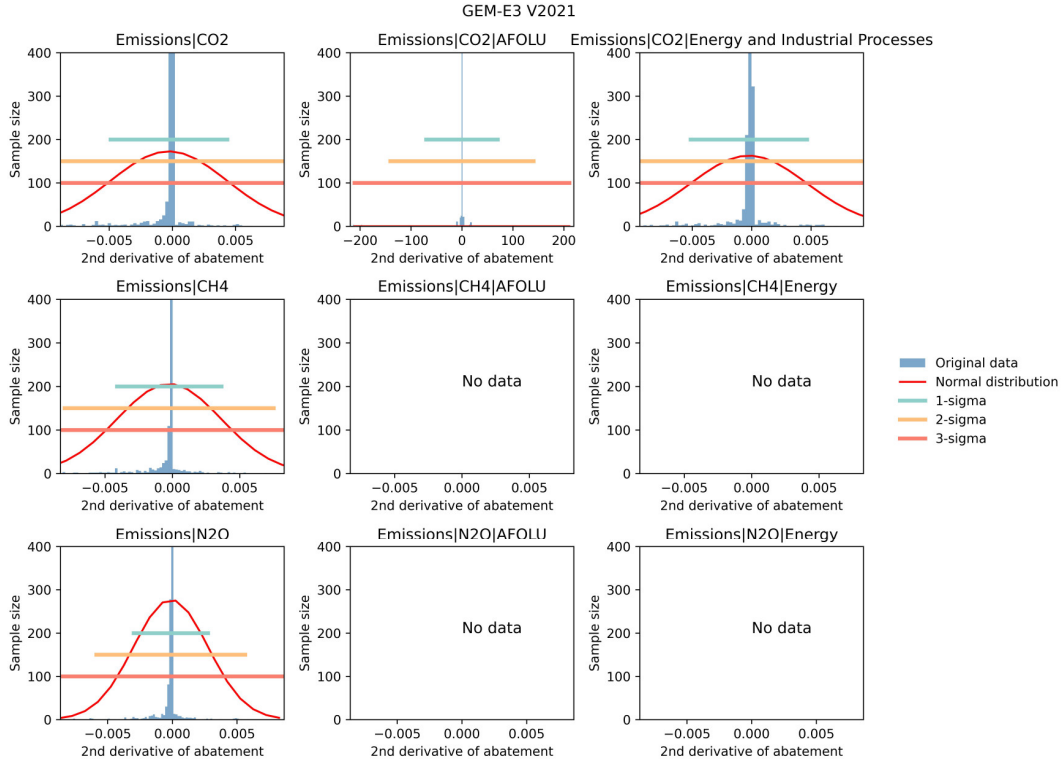

**Figure S51. Global GEM - Distribution of second derivative of abatement levels**

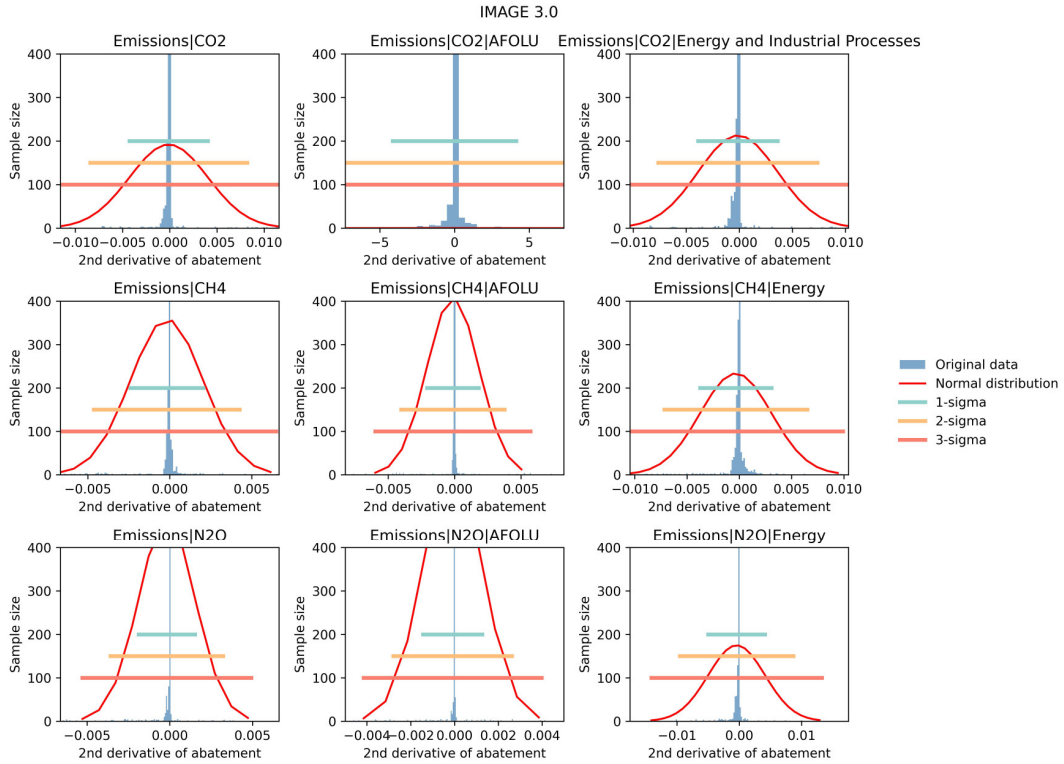

**Figure S52. Global IMAGE - Distribution of second derivative of abatement levels**

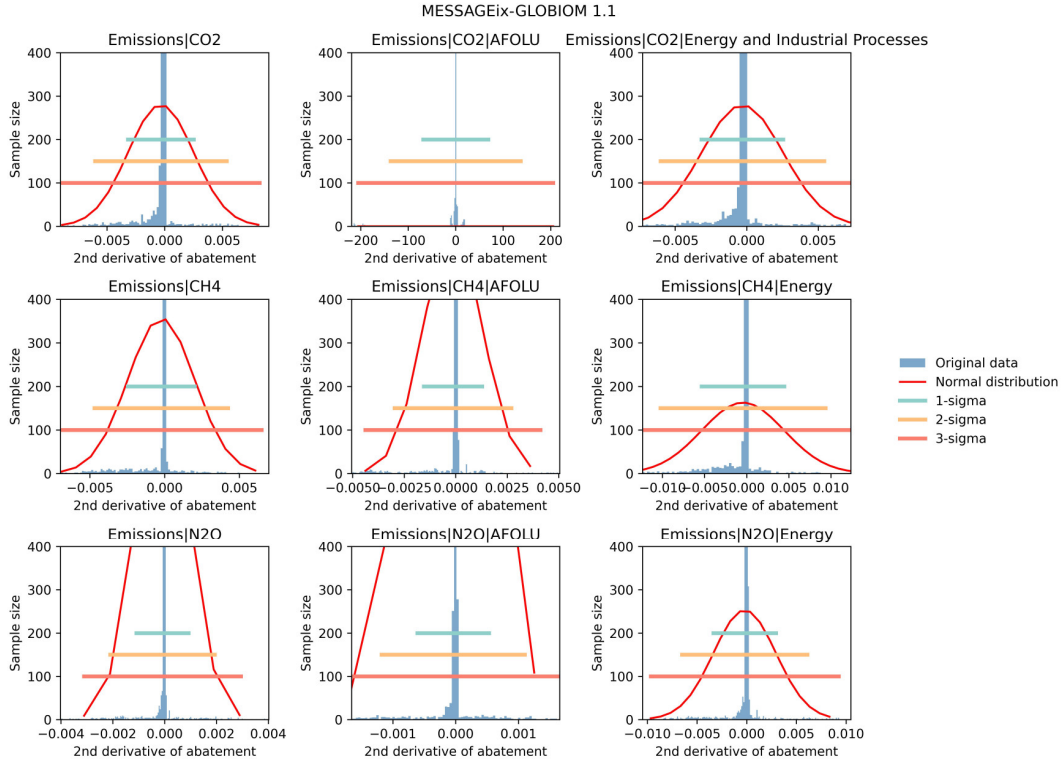

**Figure S53. Global MESSAGE - Distribution of second derivative of abatement levels**

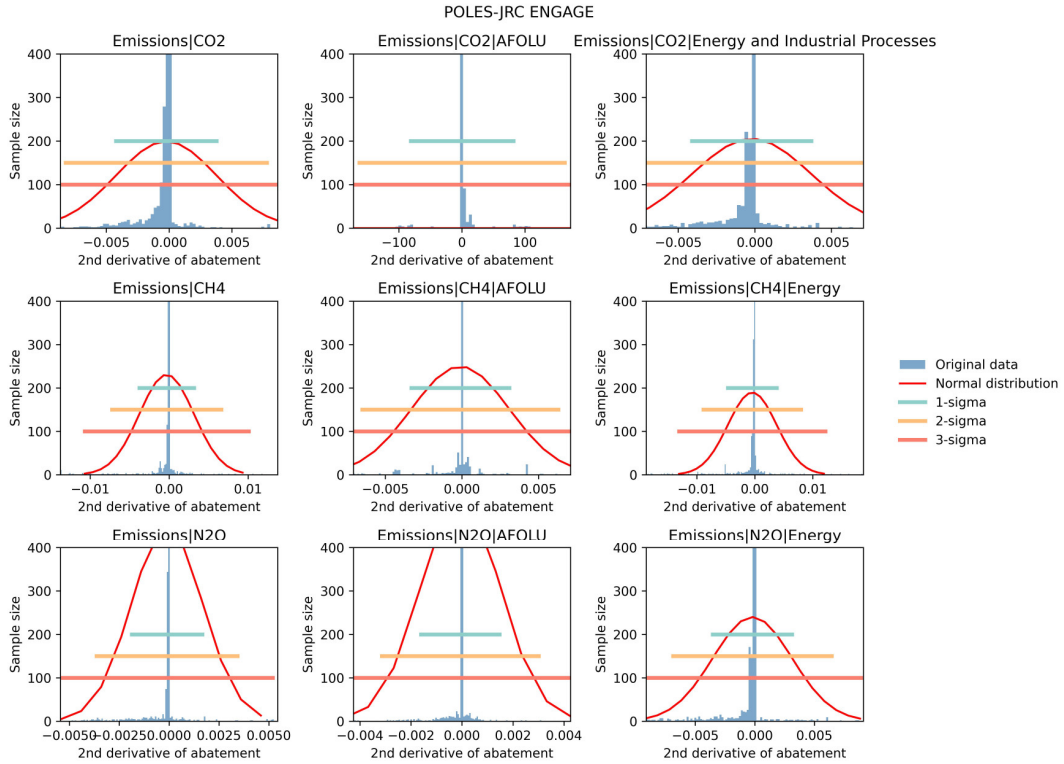

**Figure S54. Global POLES - Distribution of second derivative of abatement levels**

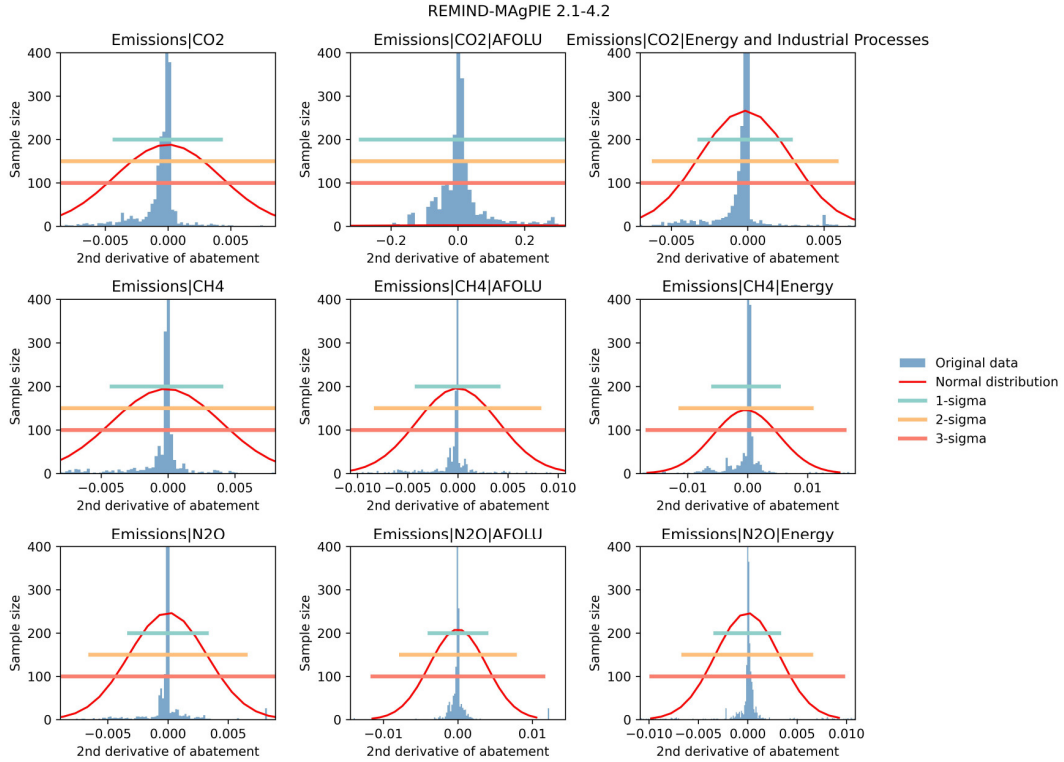

**Figure S55. Global REMIND - Distribution of second derivative of abatement levels**

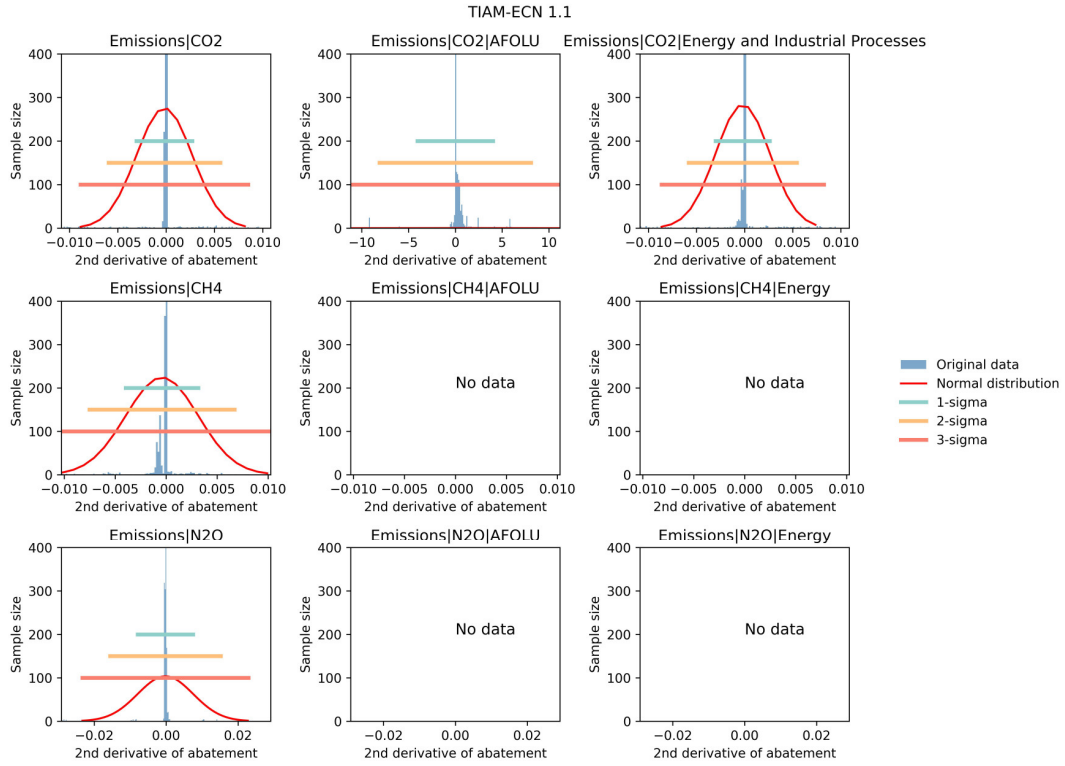

**Figure S56. Global TIAM - Distribution of second derivative of abatement levels**

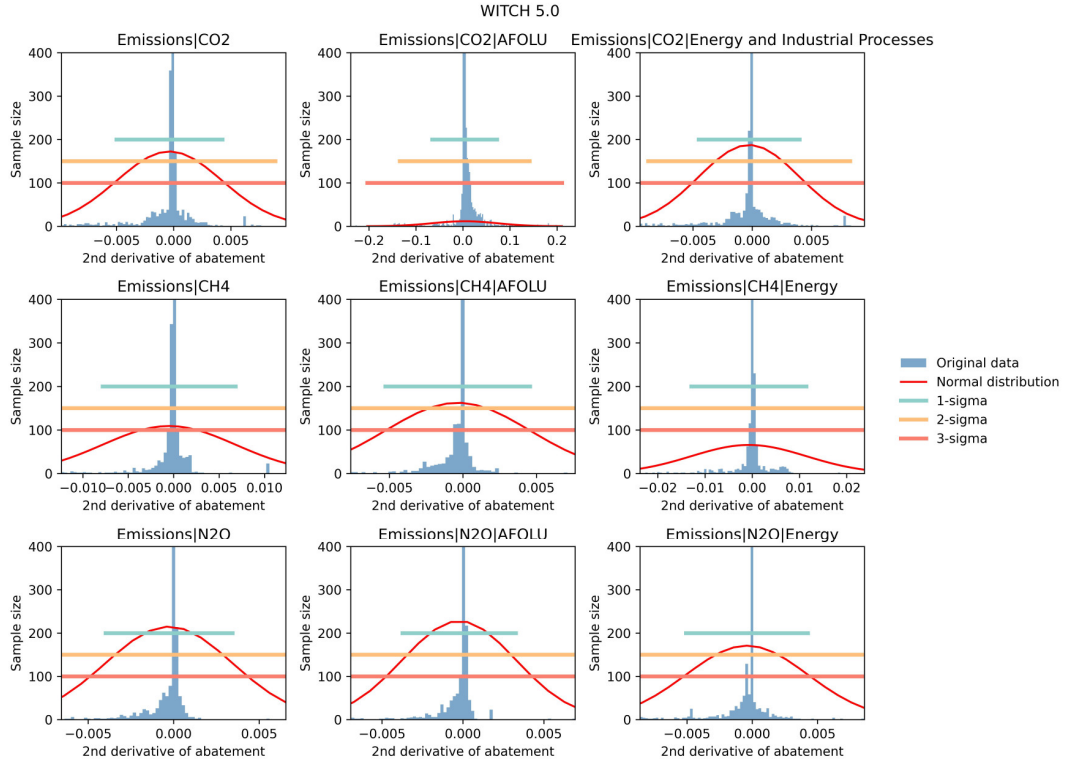

**Figure S57. Global WITCH - Distribution of second derivative of abatement levels**

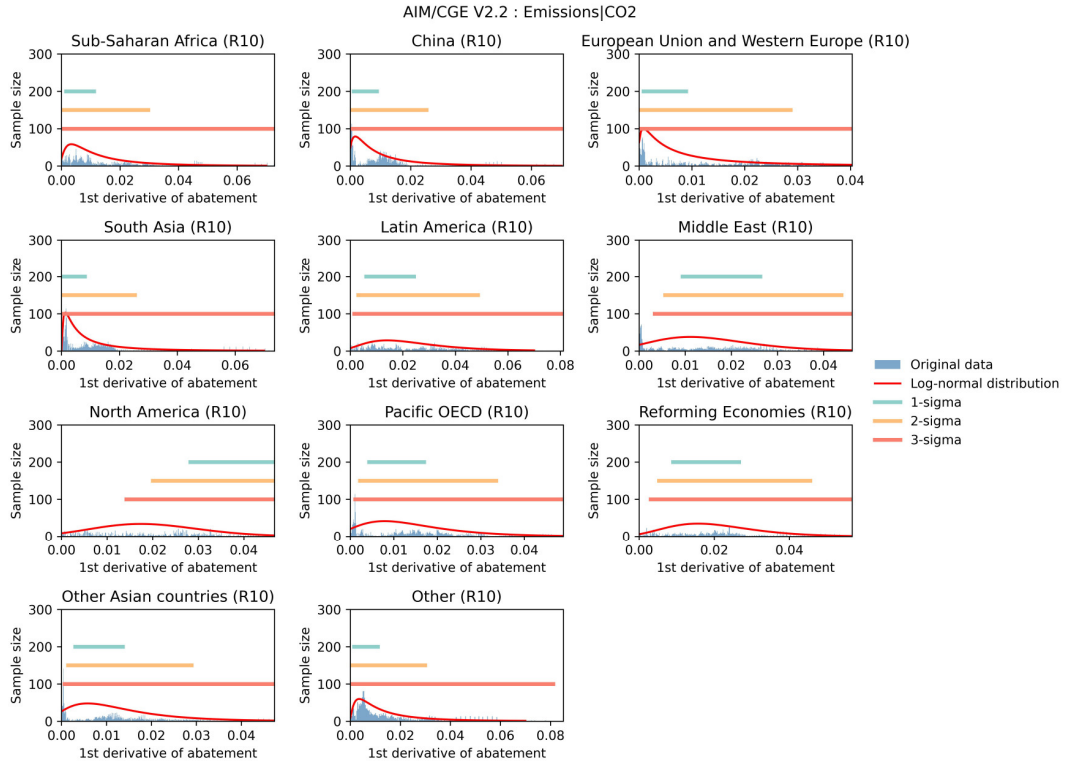

**Figure S58. Regional AIM CO<sub>2</sub> - Distribution of first derivative of abatement levels**

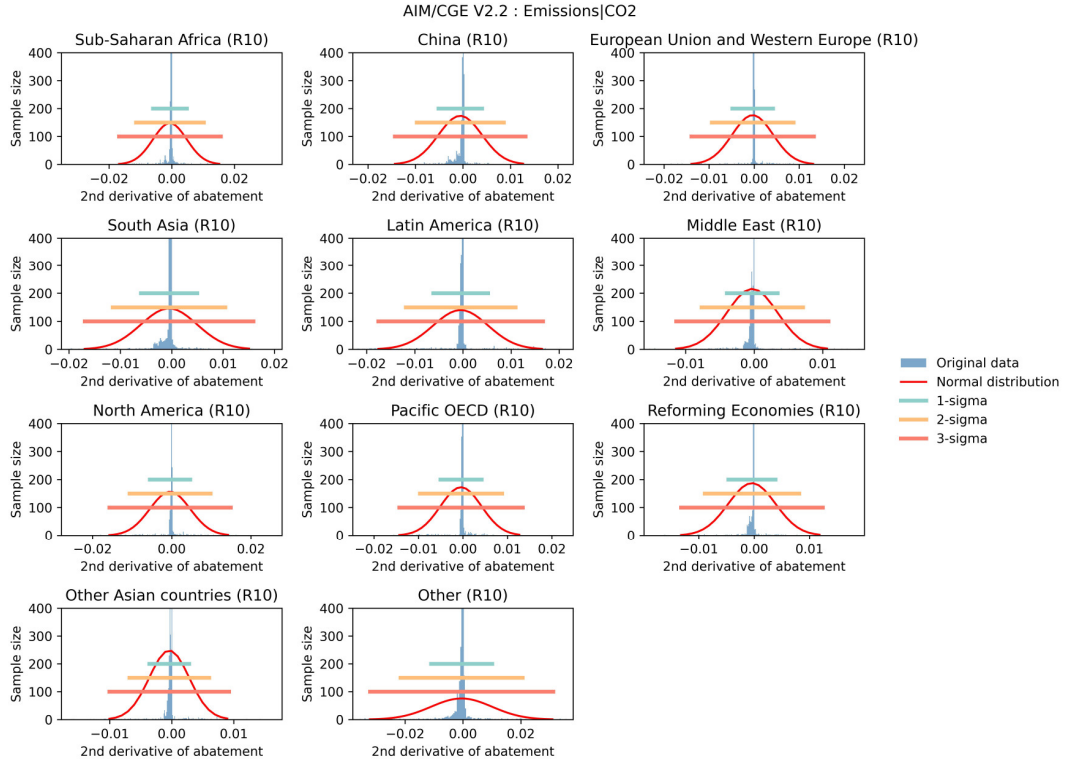

**Figure S59. Regional AIM CO<sub>2</sub> - Distribution of second derivative of abatement levels**

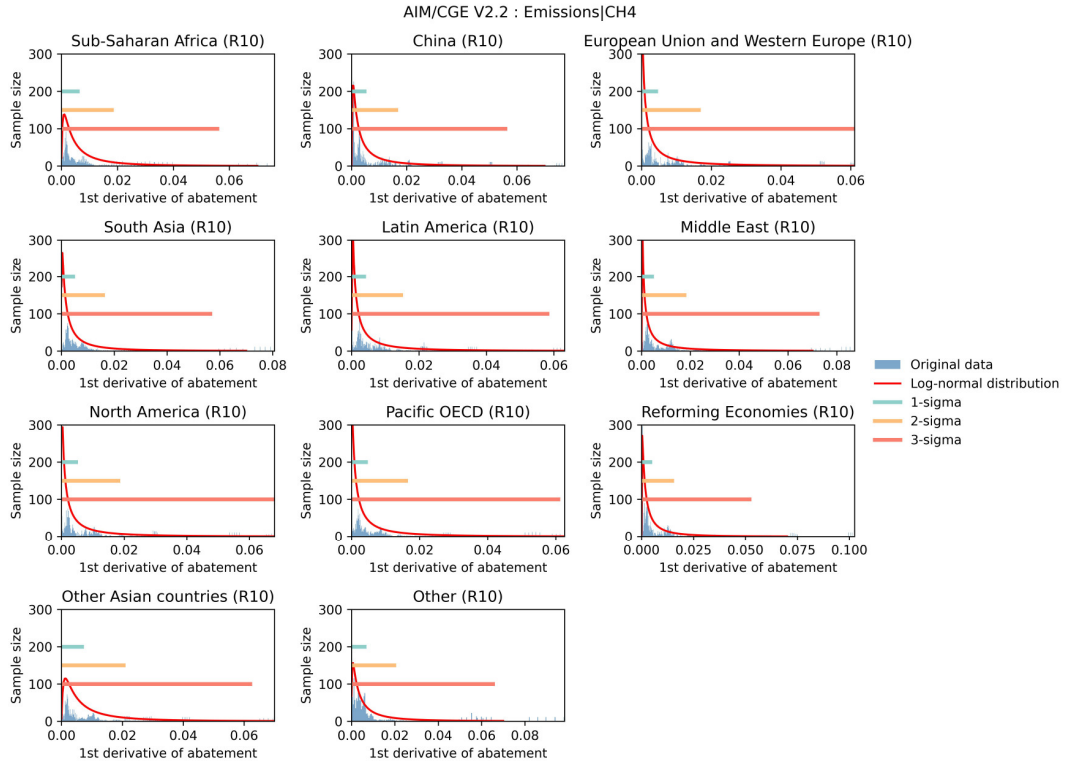

**Figure S60. Regional AIM CH<sub>4</sub>- Distribution of first derivative of abatement levels**

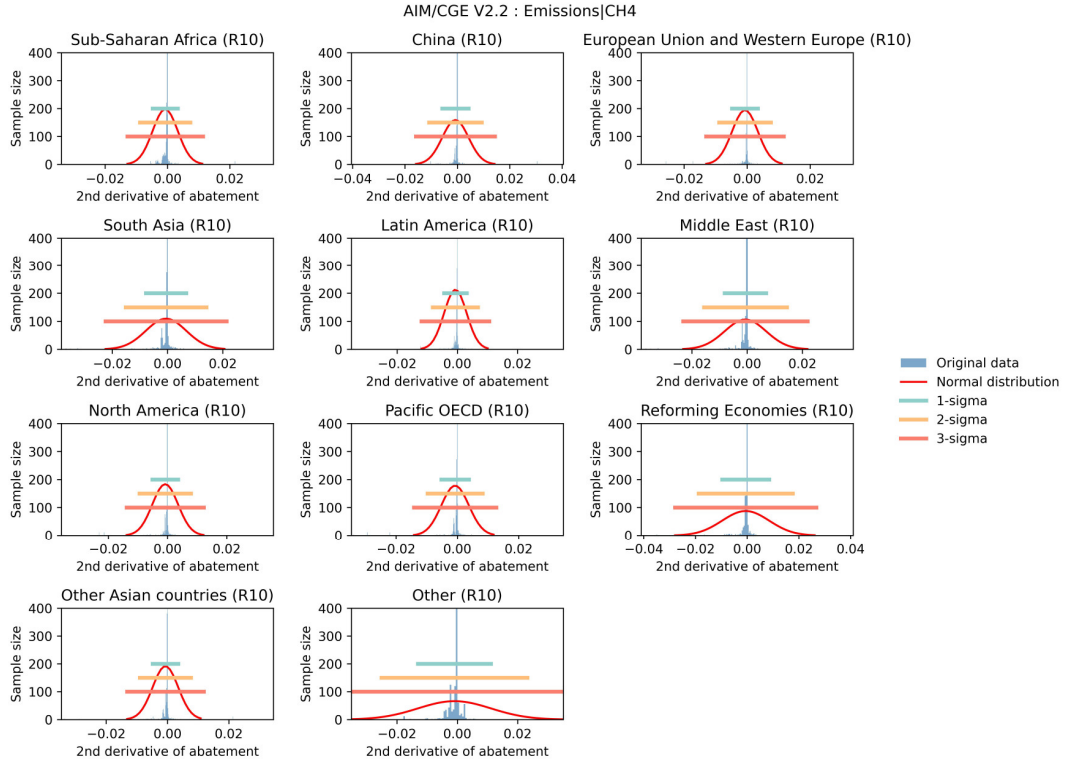

**Figure S61. Regional AIM CH<sub>4</sub>- Distribution of second derivative of abatement levels**



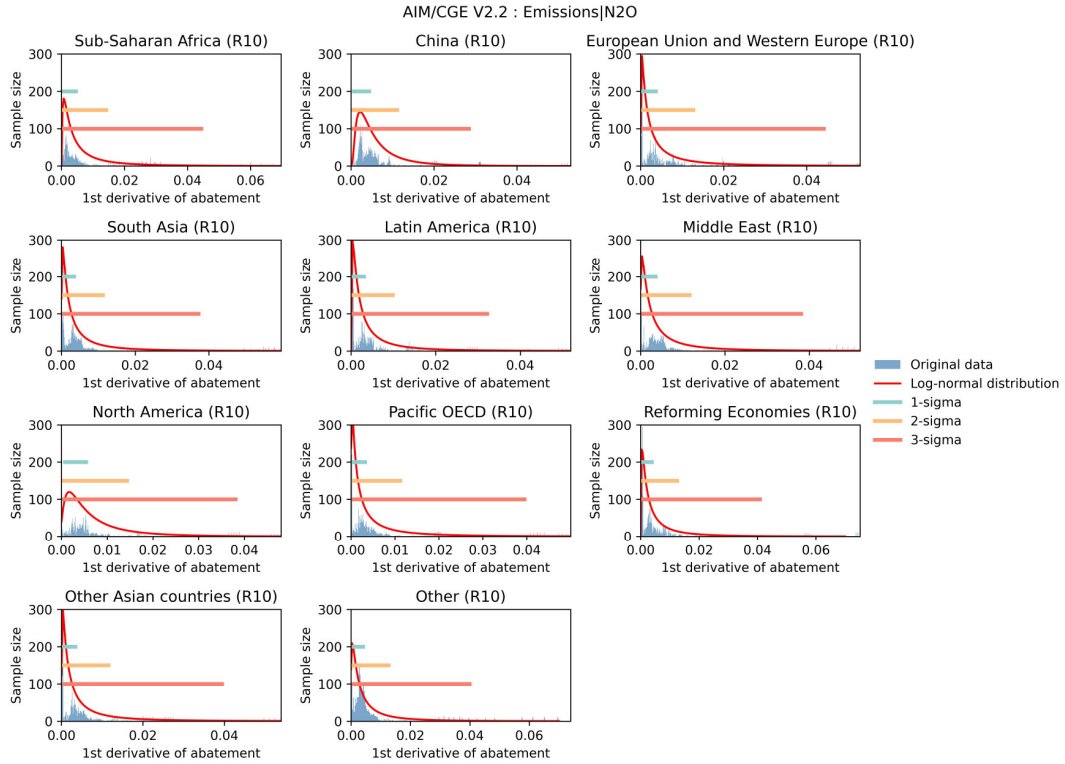

**Figure S62. Regional AIM N<sub>2</sub>O - Distribution of first derivative of abatement levels**

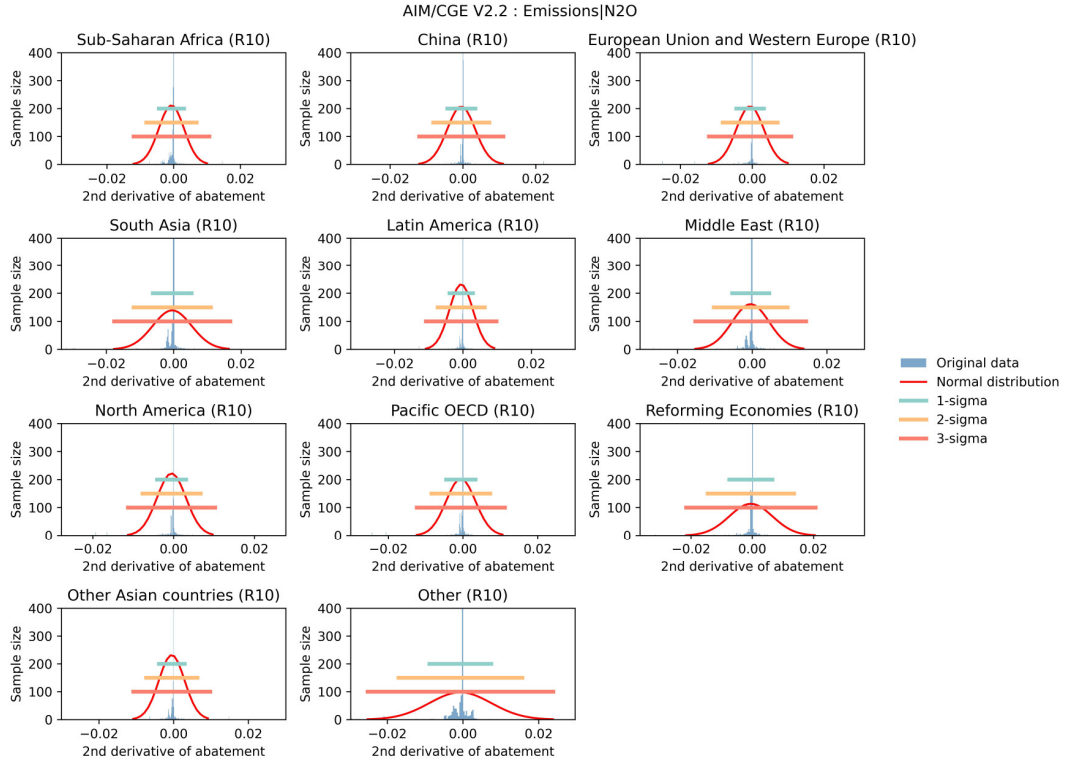

**Figure S63. Regional AIM N<sub>2</sub>O - Distribution of second derivative of abatement levels**



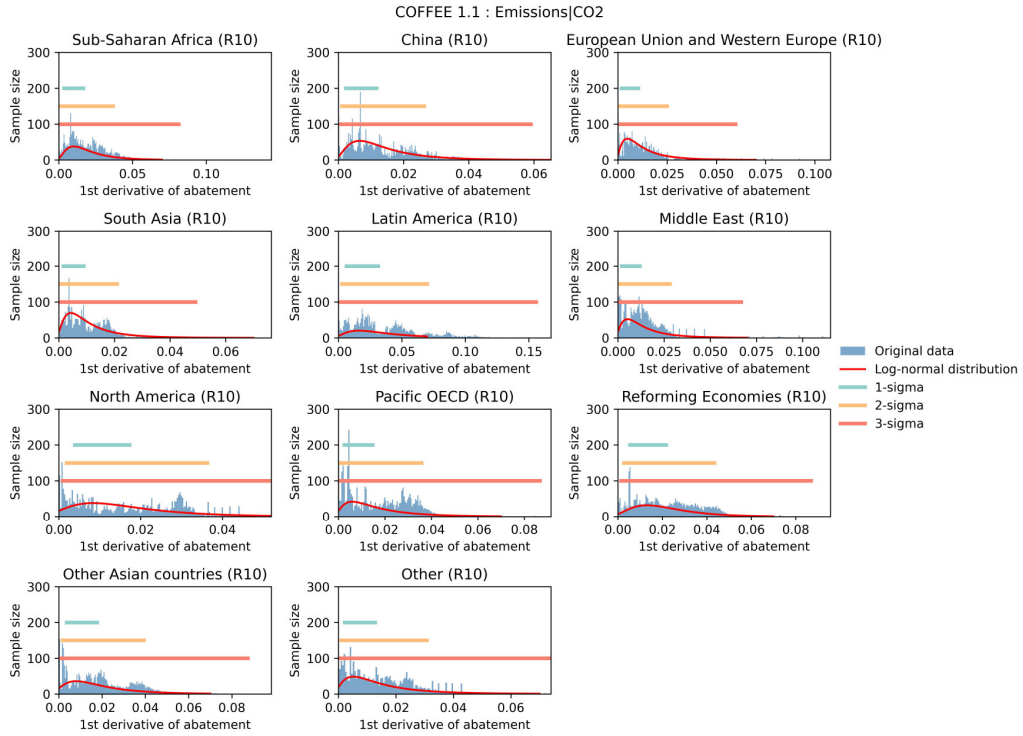

**Figure S64. Regional COFFEE CO<sub>2</sub> - Distribution of first derivative of abatement levels**

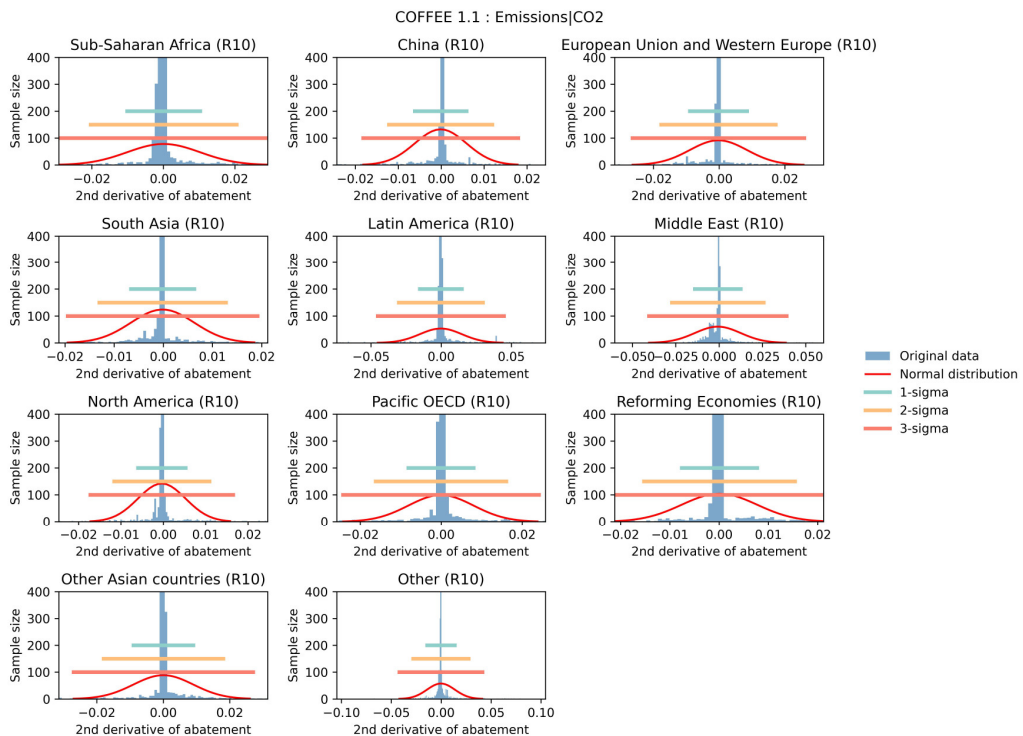

**Figure S65. Regional COFFEE CO<sub>2</sub> - Distribution of second derivative of abatement levels**

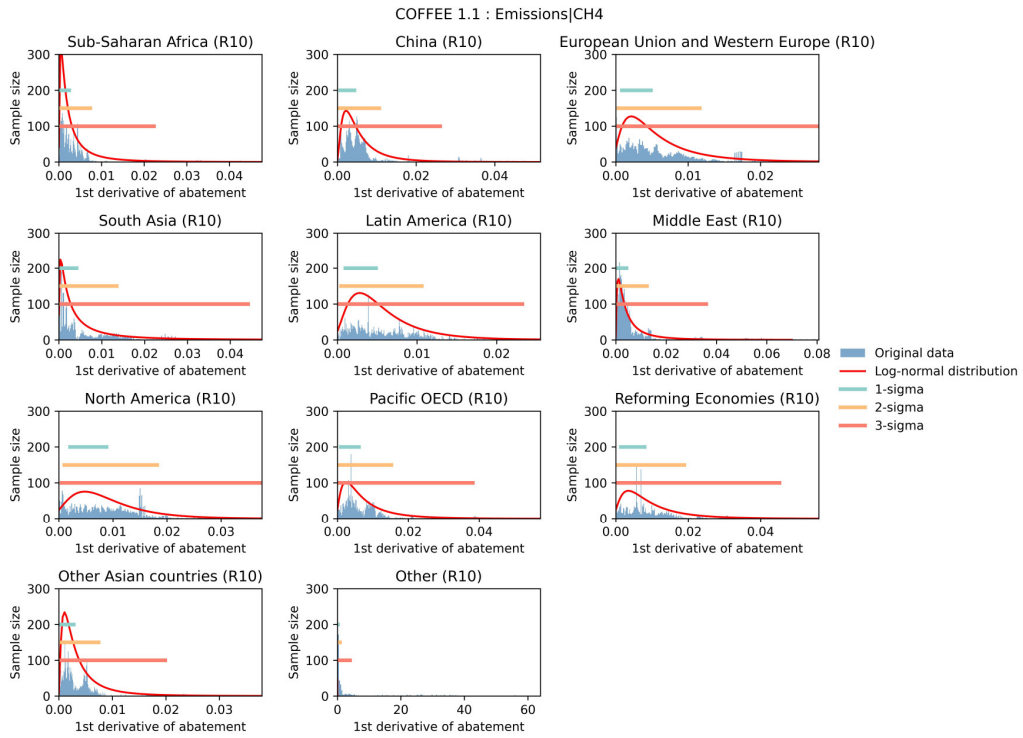

**Figure S66. Regional COFFEE CH<sub>4</sub> - Distribution of first derivative of abatement levels**

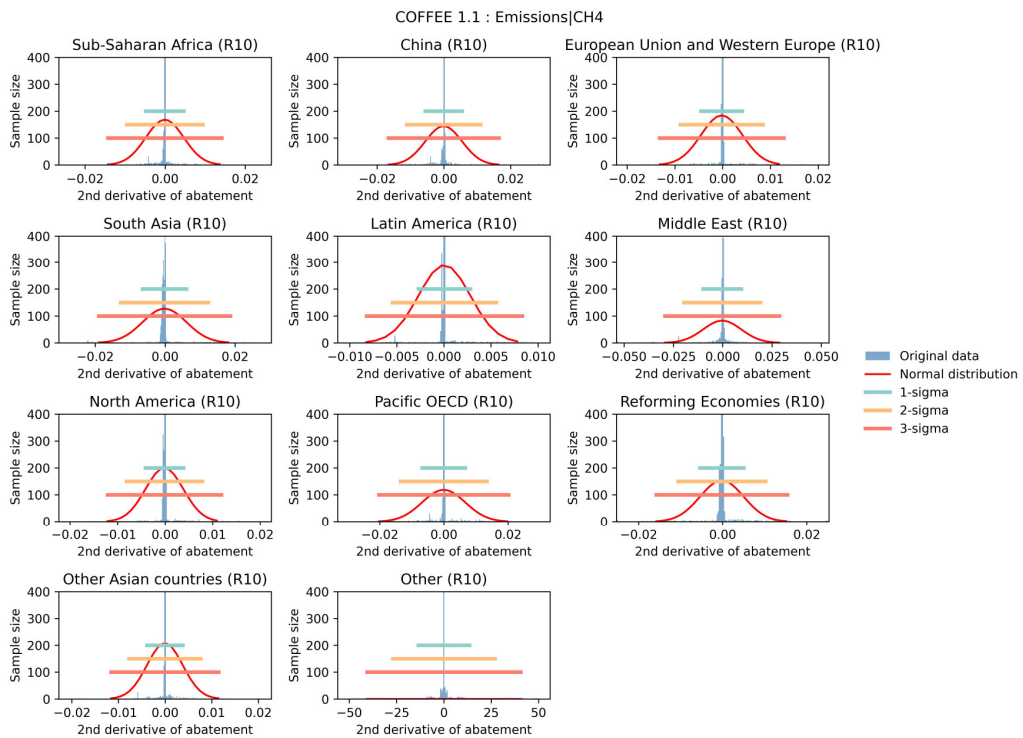

**Figure S67. Regional COFFEE CH<sub>4</sub> - Distribution of second derivative of abatement levels**

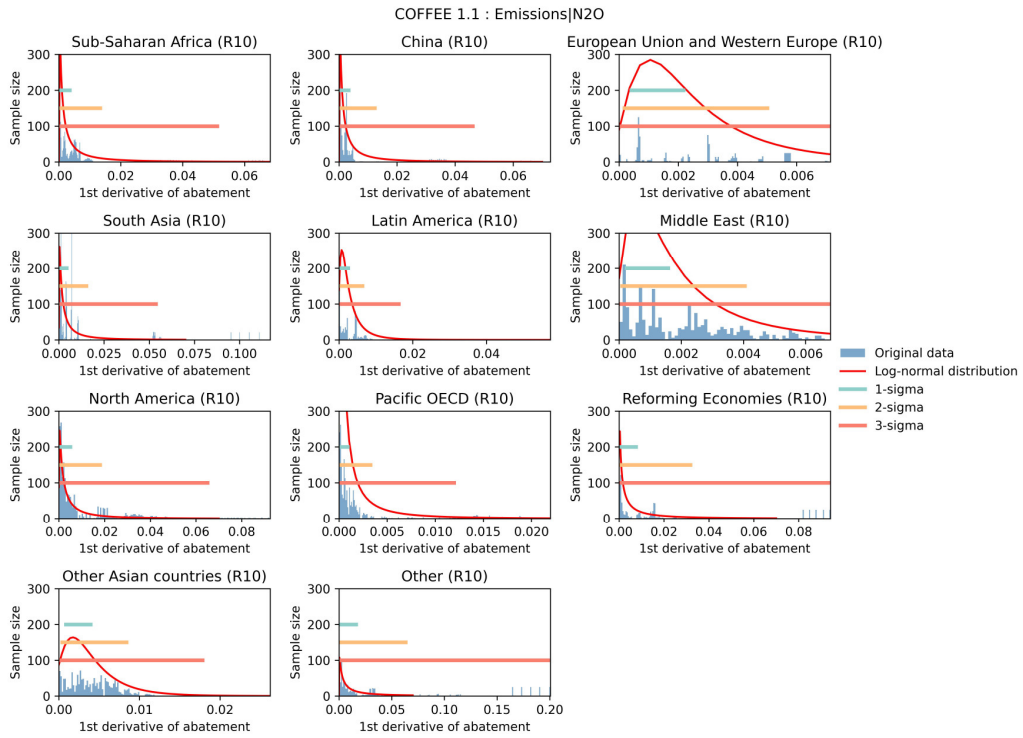

**Figure S68. Regional COFFEE N<sub>2</sub>O - Distribution of first derivative of abatement levels**

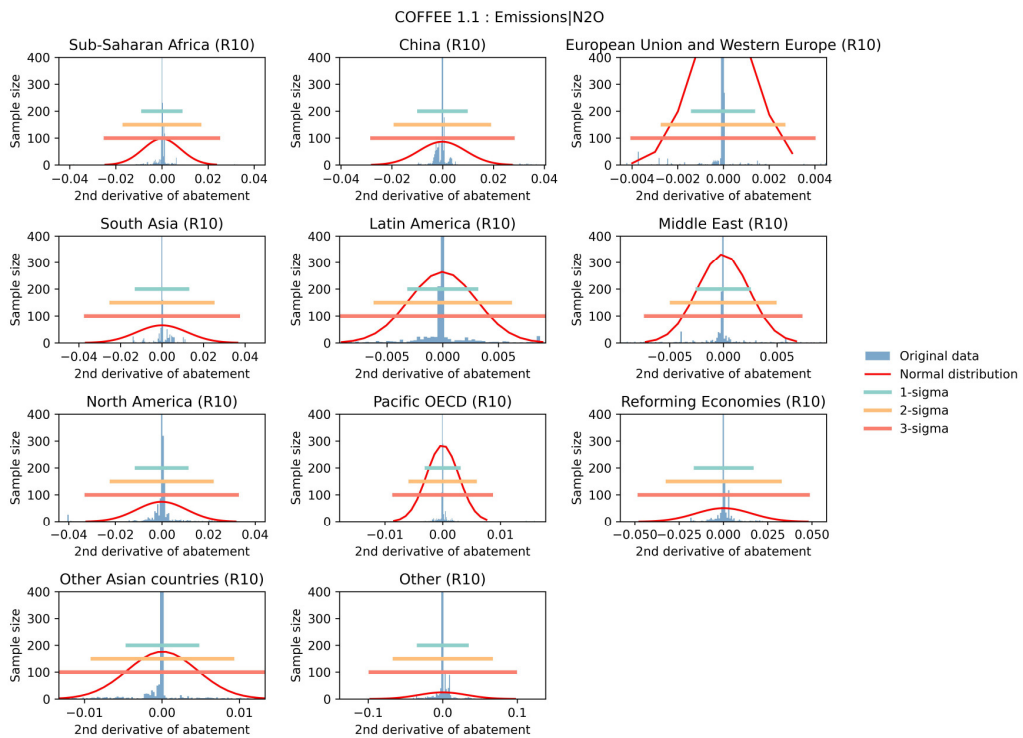

**Figure S69. Regional COFFEE N<sub>2</sub>O - Distribution of second derivative of abatement levels**

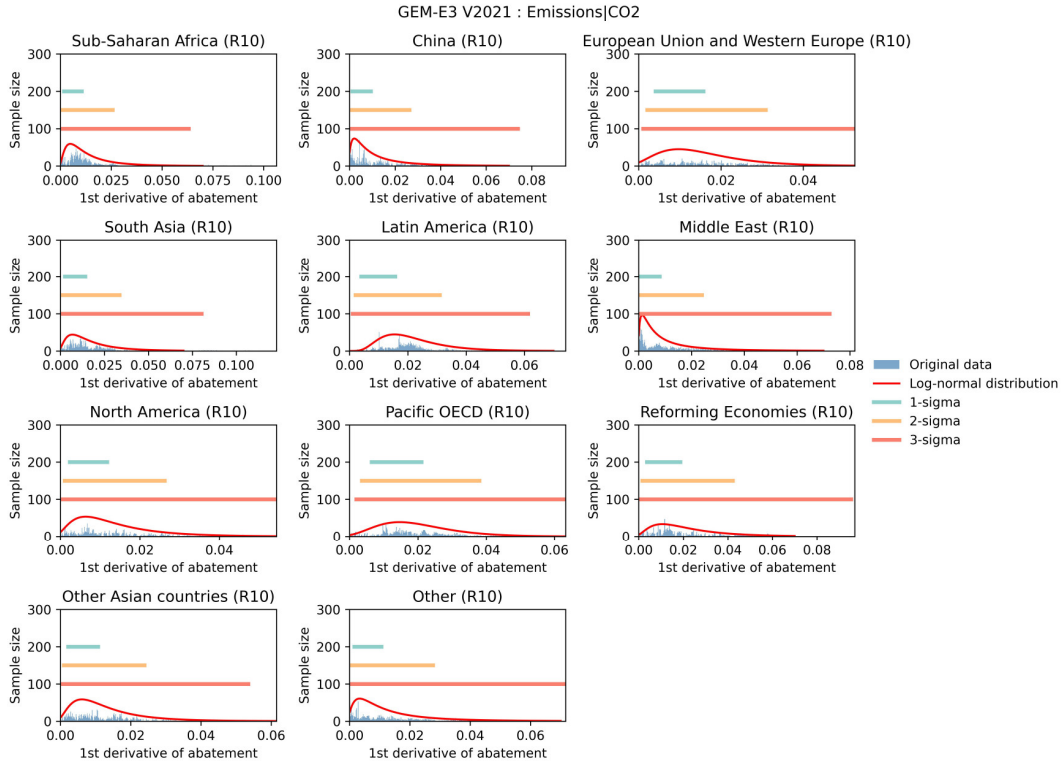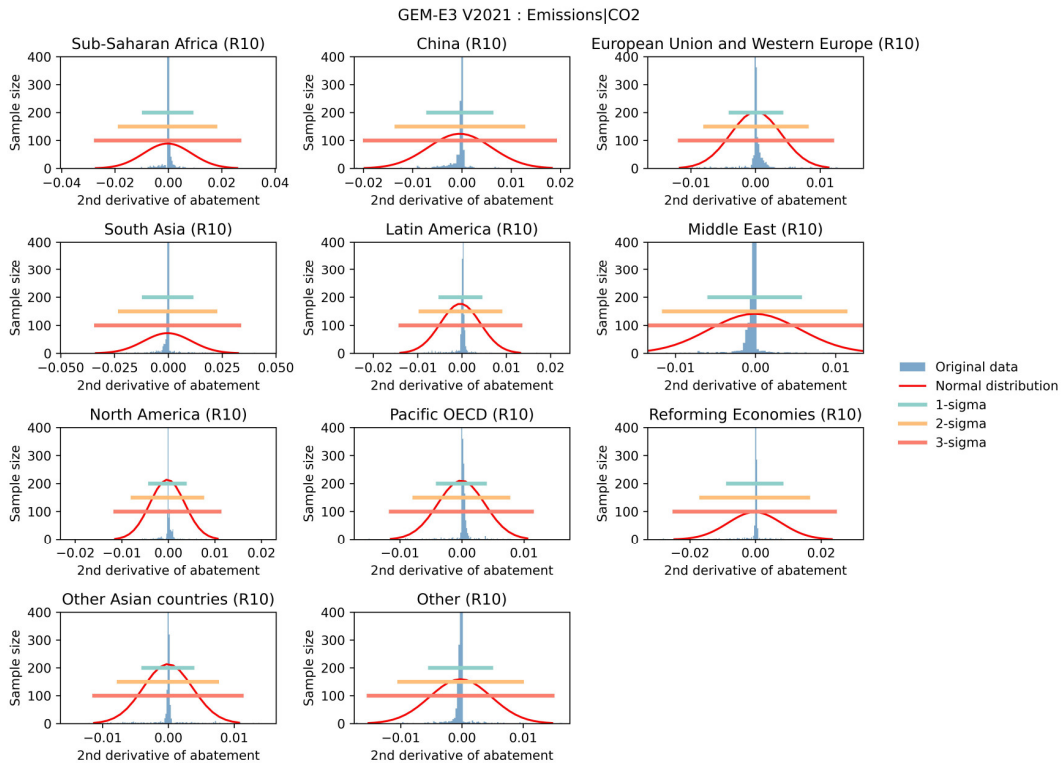

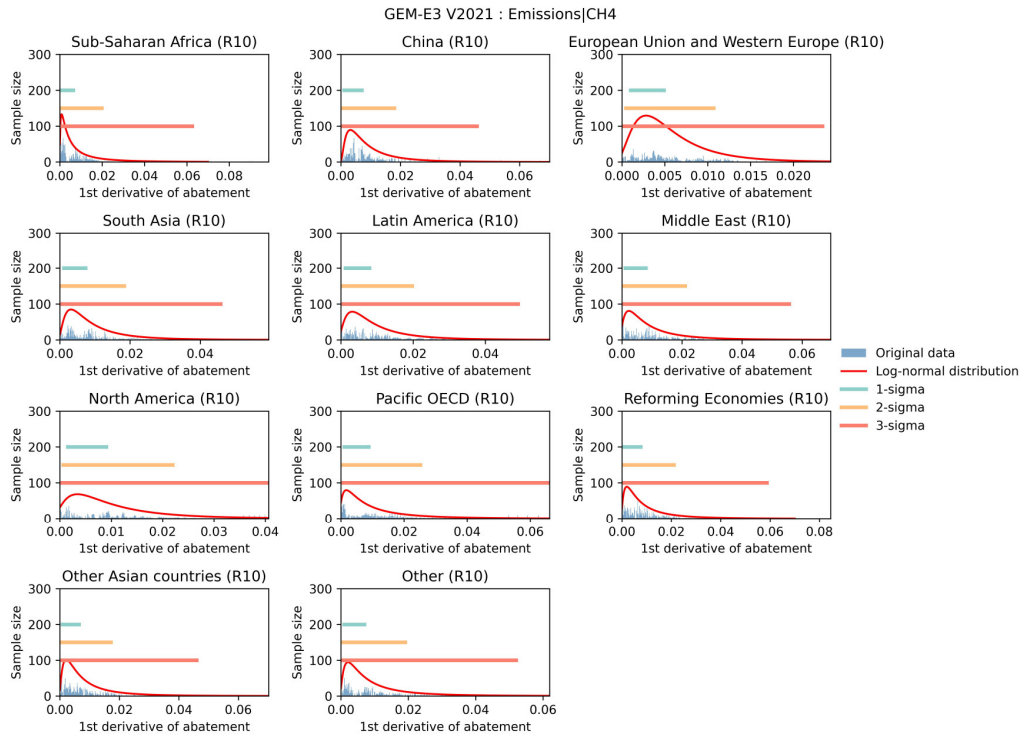

**Figure S72. Regional GEM CH<sub>4</sub> - Distribution of first derivative of abatement levels**

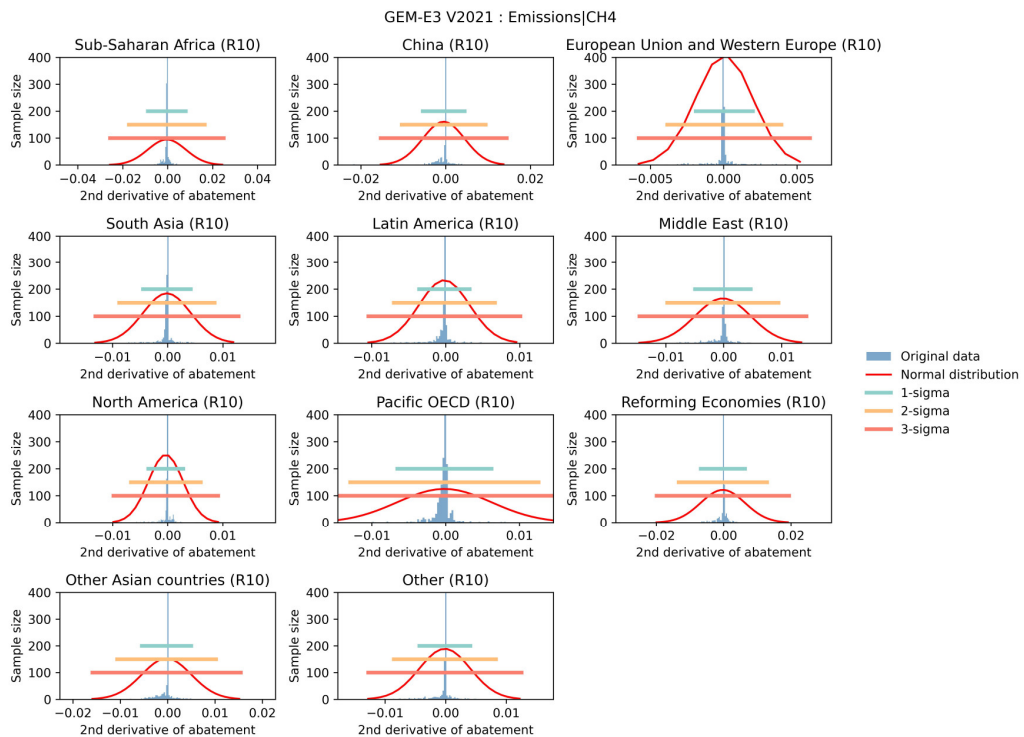

**Figure S73. Regional GEM CH<sub>4</sub> - Distribution of second derivative of abatement levels**

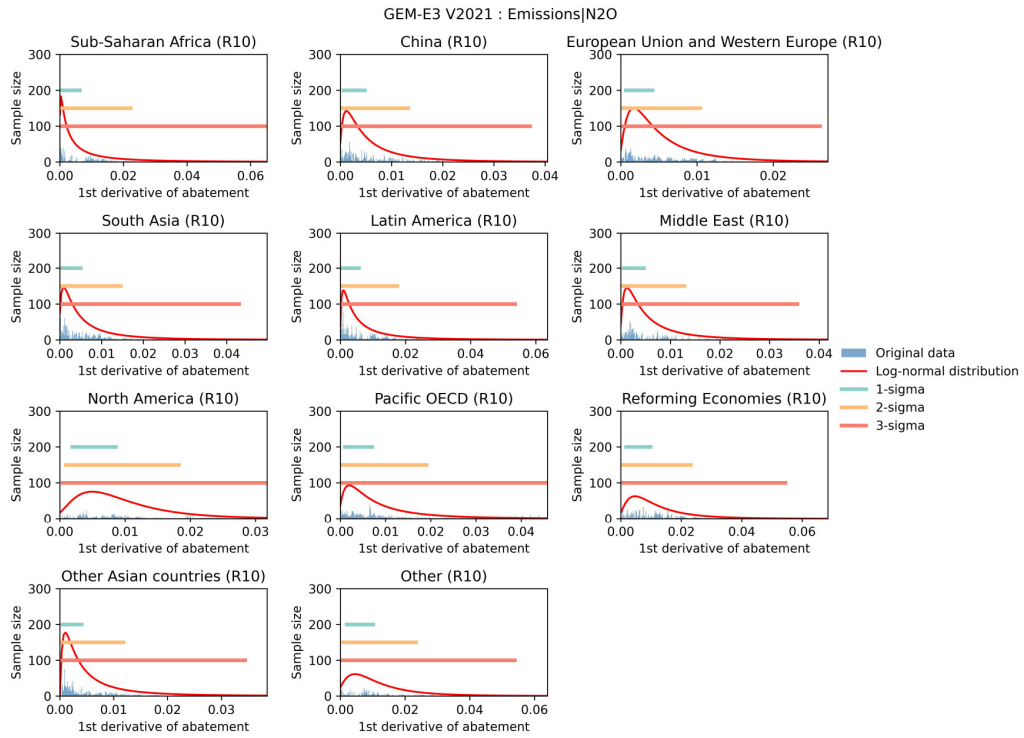

**Figure S74. Regional GEM N<sub>2</sub>O - Distribution of first derivative of abatement levels**

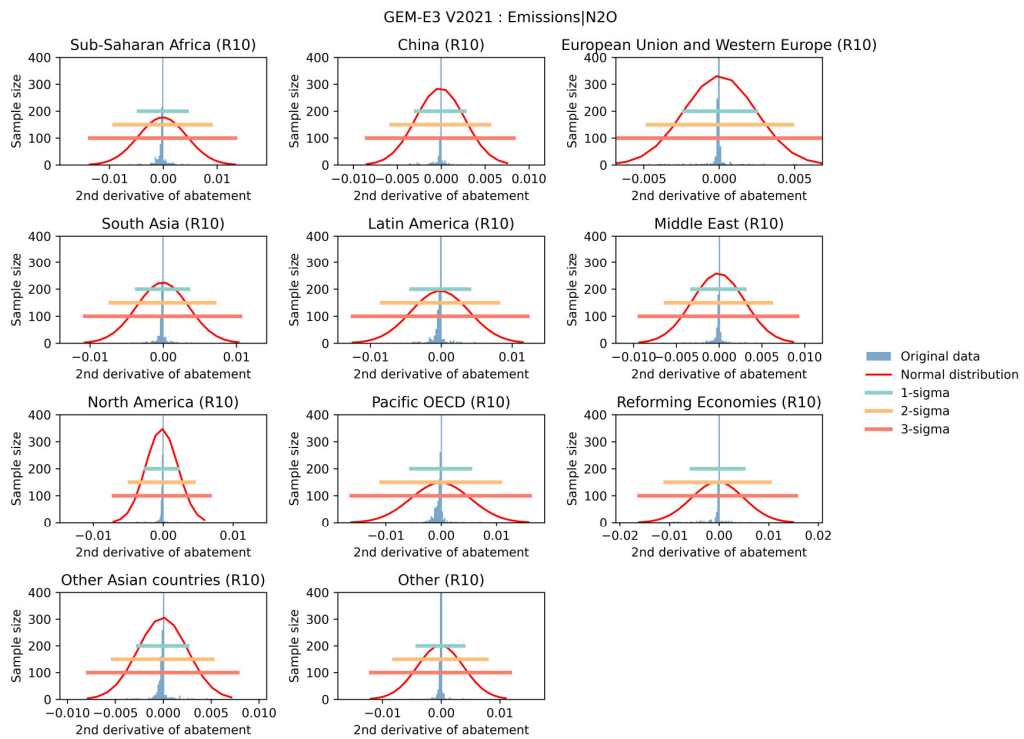

**Figure S75. Regional GEM N<sub>2</sub>O - Distribution of second derivative of abatement levels**



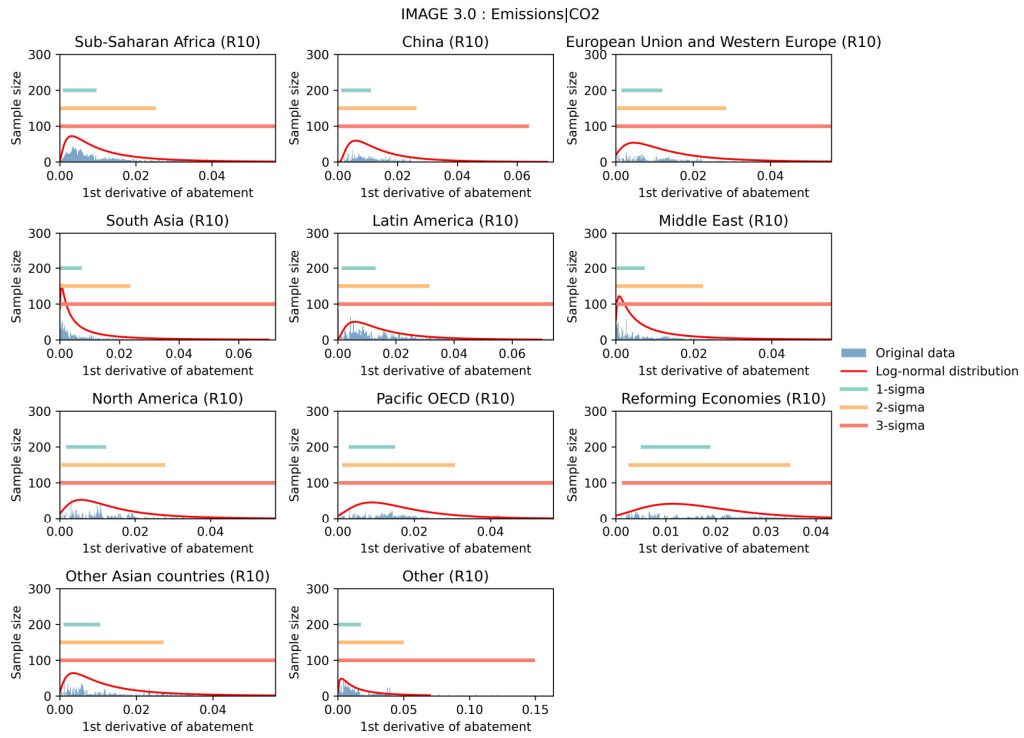

**Figure S76. Regional IMAGE CO<sub>2</sub> - Distribution of first derivative of abatement levels**

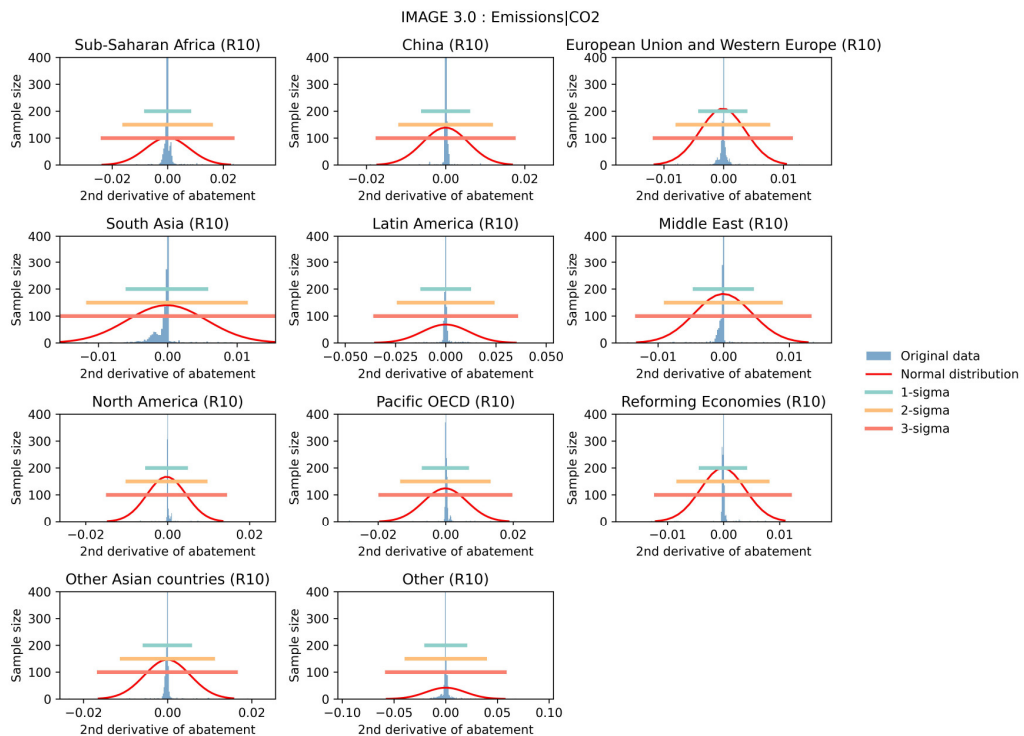

**Figure S77. Regional IMAGE CO<sub>2</sub> - Distribution of second derivative of abatement levels**



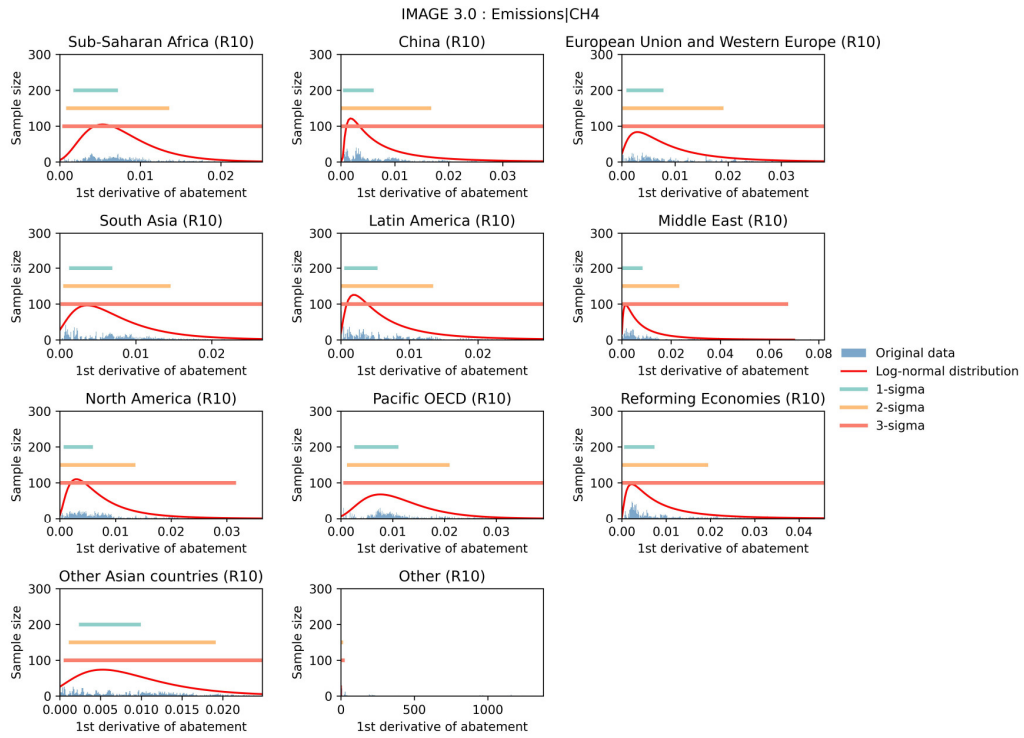

**Figure S78. Regional IMAGE CH<sub>4</sub> - Distribution of first derivative of abatement levels**

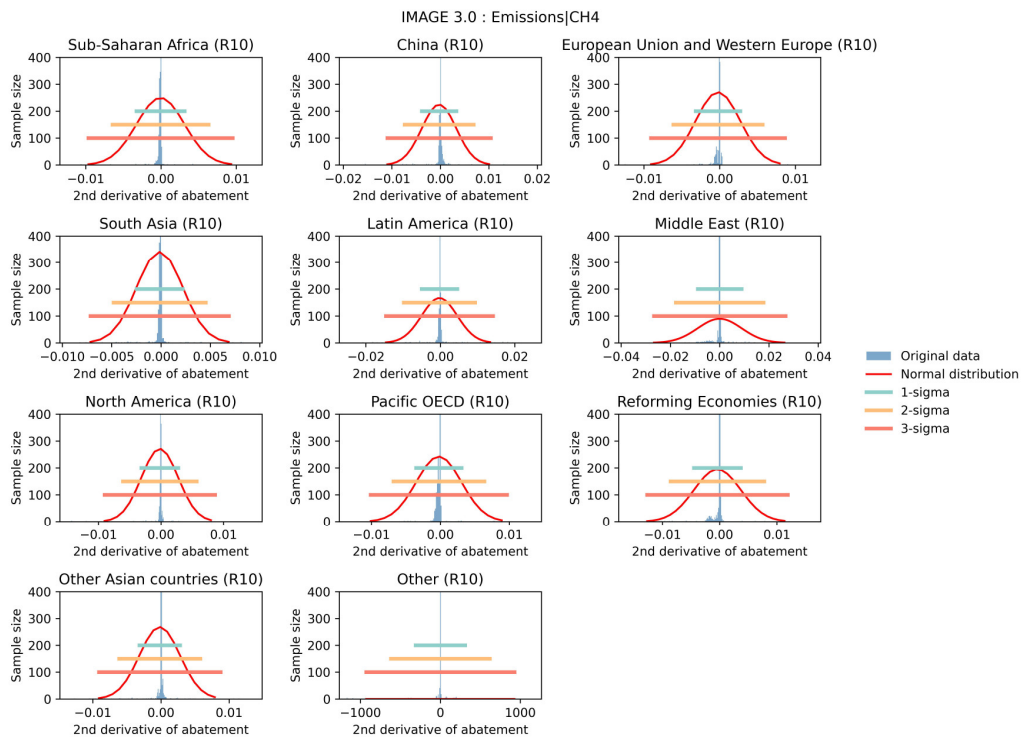

**Figure S79. Regional IMAGE CH<sub>4</sub> - Distribution of second derivative of abatement levels**

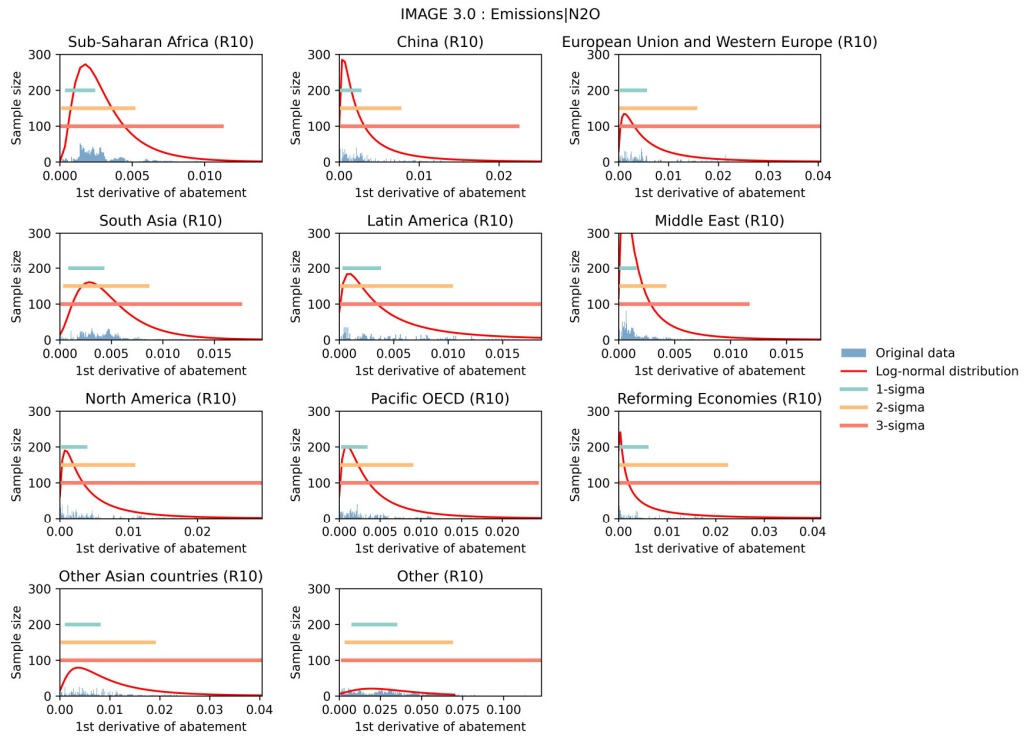

**Figure S80. Regional IMAGE N<sub>2</sub>O - Distribution of first derivative of abatement levels**

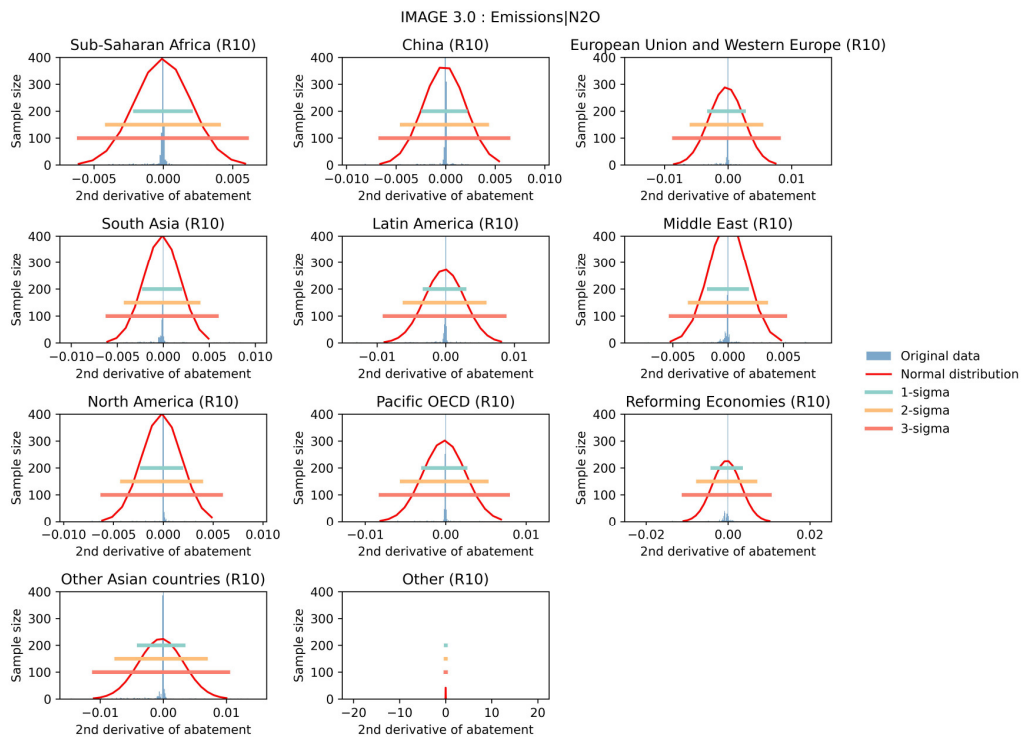

**Figure S81. Regional IMAGE N<sub>2</sub>O - Distribution of second derivative of abatement levels**

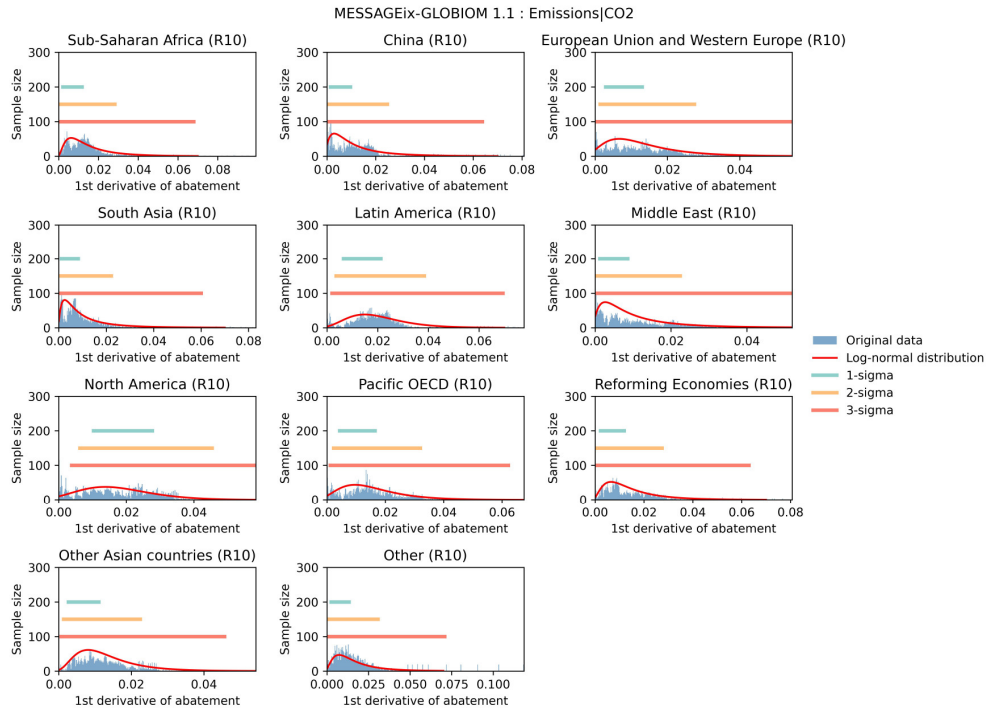

**Figure S82. Regional MESSAGE CO<sub>2</sub> - Distribution of first derivative of abatement levels**

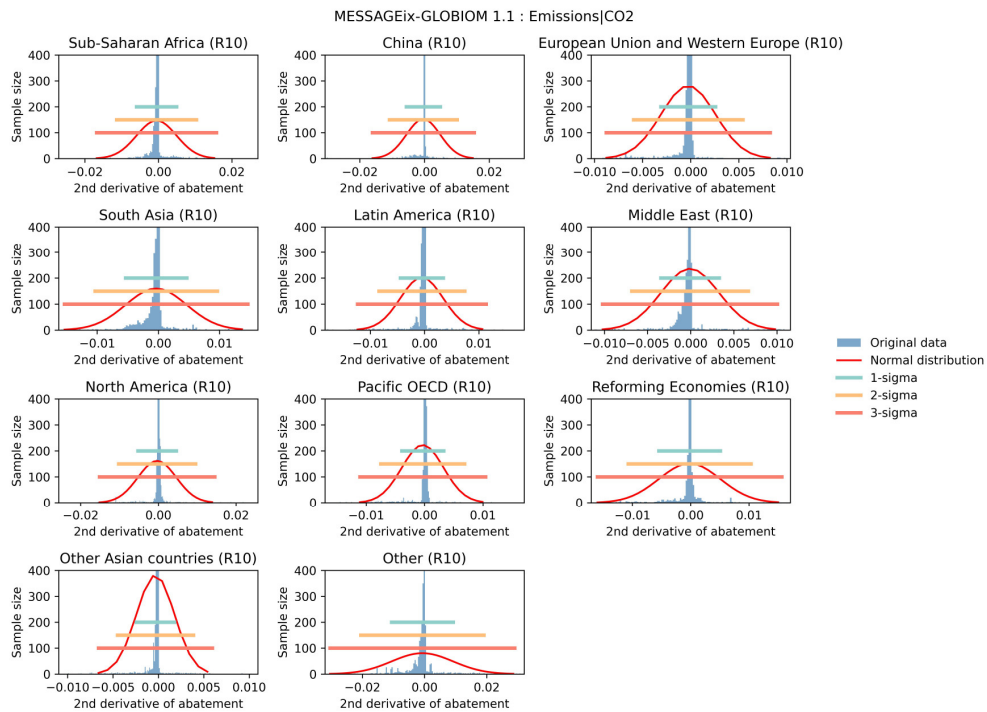

**Figure S83. Regional MESSAGE CO<sub>2</sub> - Distribution of second derivative of abatement levels**

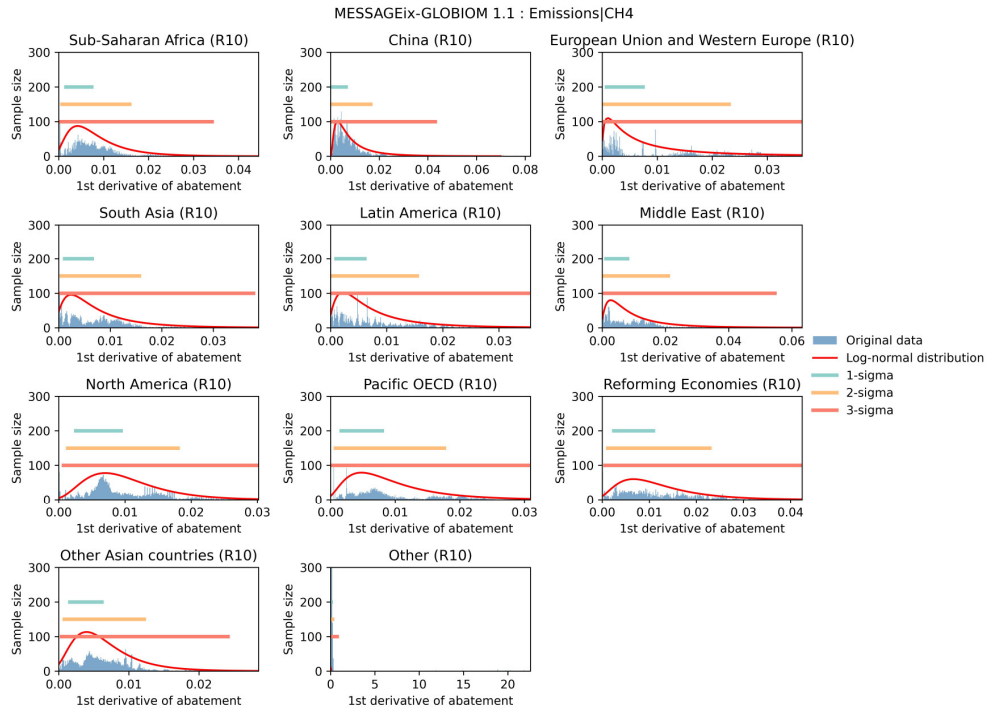

**Figure S84. Regional MESSAGE CH<sub>4</sub> - Distribution of first derivative of abatement levels**

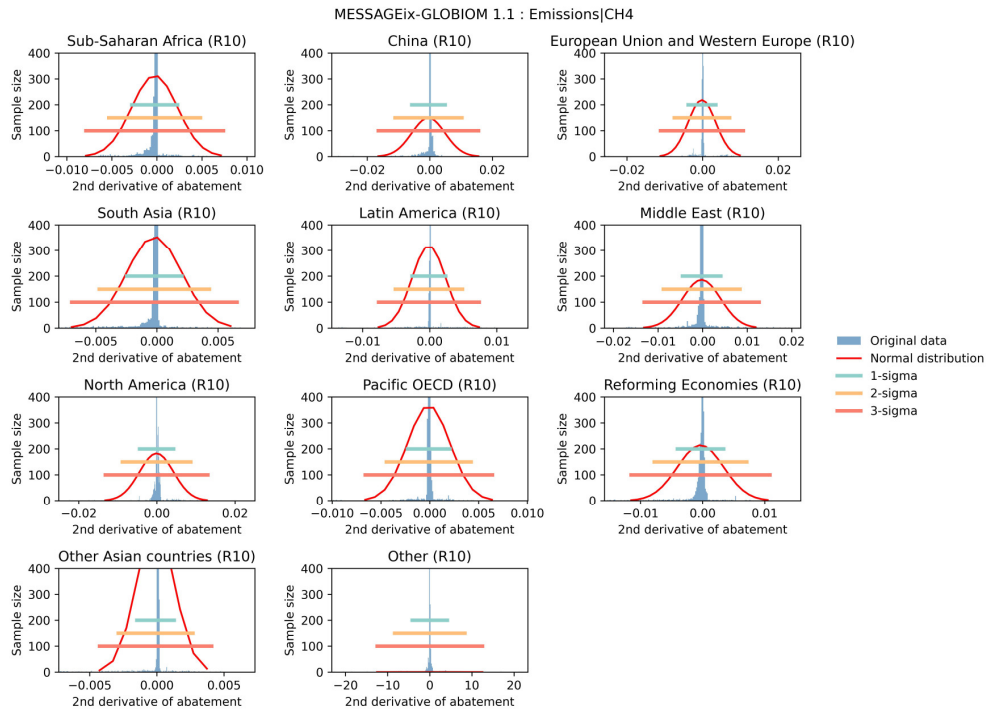

**Figure S85. Regional MESSAGE CH<sub>4</sub> - Distribution of second derivative of abatement levels**

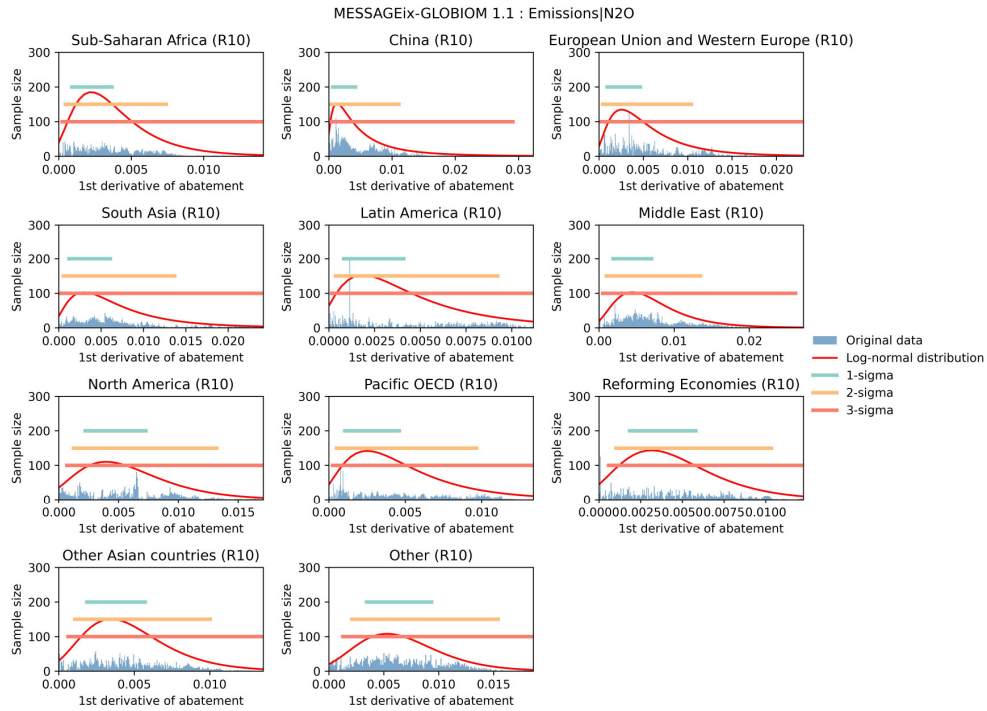

**Figure S86. Regional MESSAGE N<sub>2</sub>O - Distribution of first derivative of abatement levels**

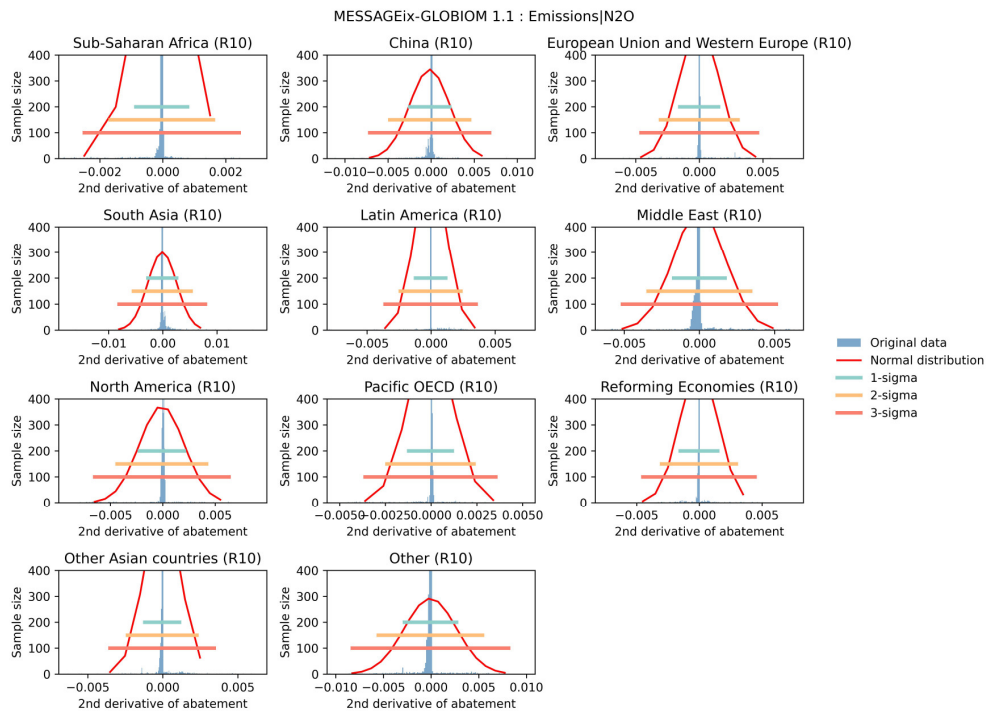

**Figure S87. Regional MESSAGE N<sub>2</sub>O - Distribution of second derivative of abatement levels**

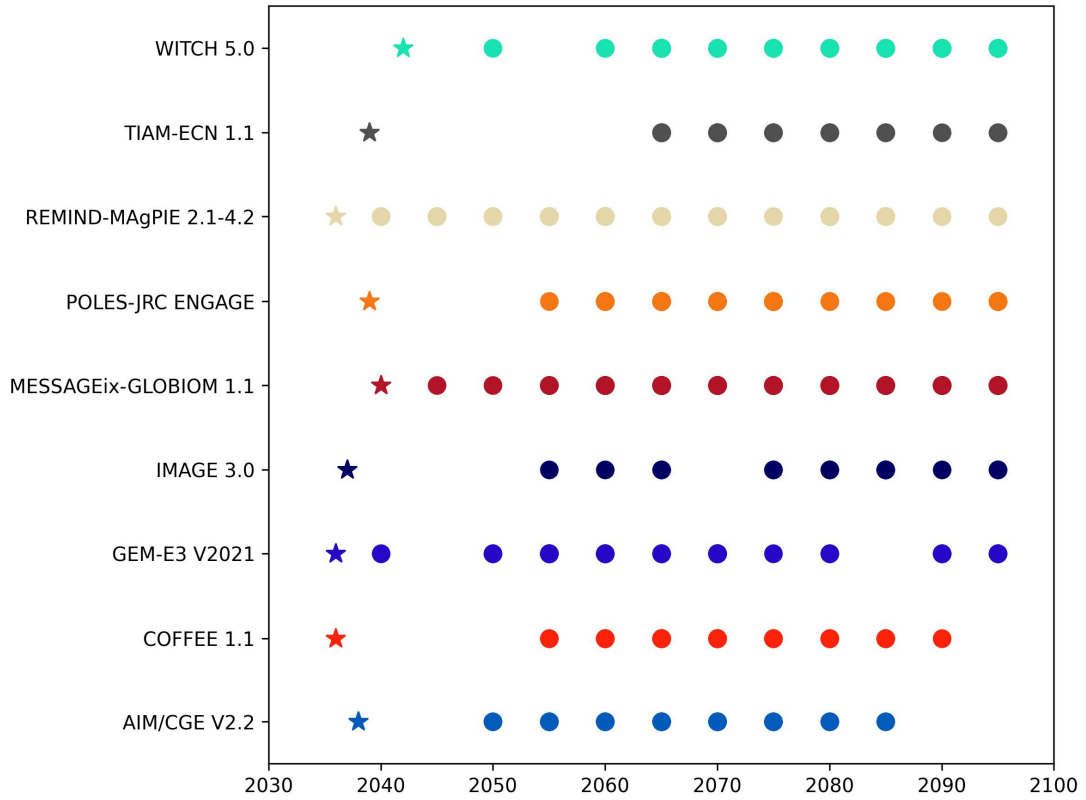

**Figure S88. The earliest year of achieving net zero indicated by our emulator**

We calculated the earliest year of achieving net zero based on the upper limits of the 1<sup>st</sup> and 2<sup>nd</sup> derivatives of abatement changes as shown in stars. The distribution of net-zero years in the carbon budget scenarios of each ENGAGE IAM is shown in circles.



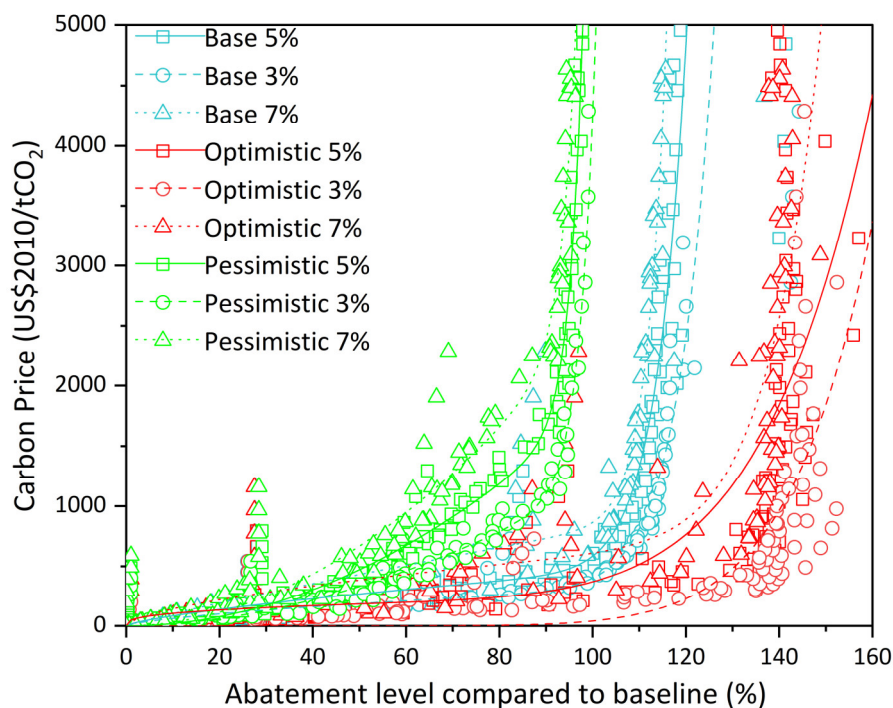

**Figure S89. The relationship between abatement level and carbon price with different discount rates for GET with different portfolios**

The discount rate in the GET model is changed to 3%, 5% (default), and 7%, respectively.

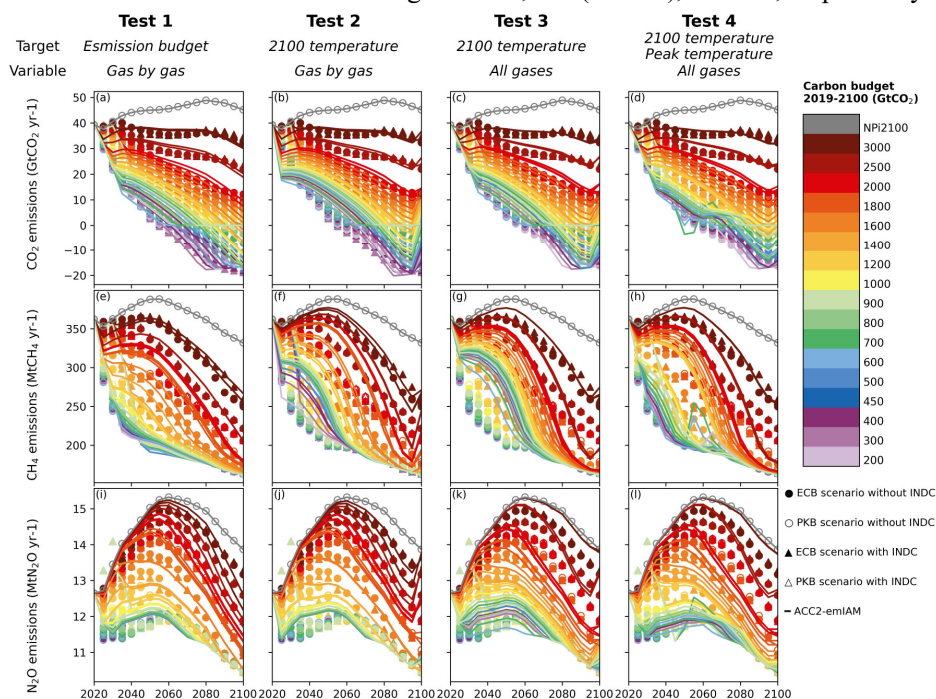

**Figure S90. Overview of the validation results for ACC2-emIAM with REMIND as an example**

The points show the original emission pathways from REMIND obtained from the ENGAGE Scenario Explorer; the lines show the emission pathways reproduced from ACC2-emIAM. The same color is used for each pair of original and reproduced pathways. The figure shows the comparisons from all scenarios.



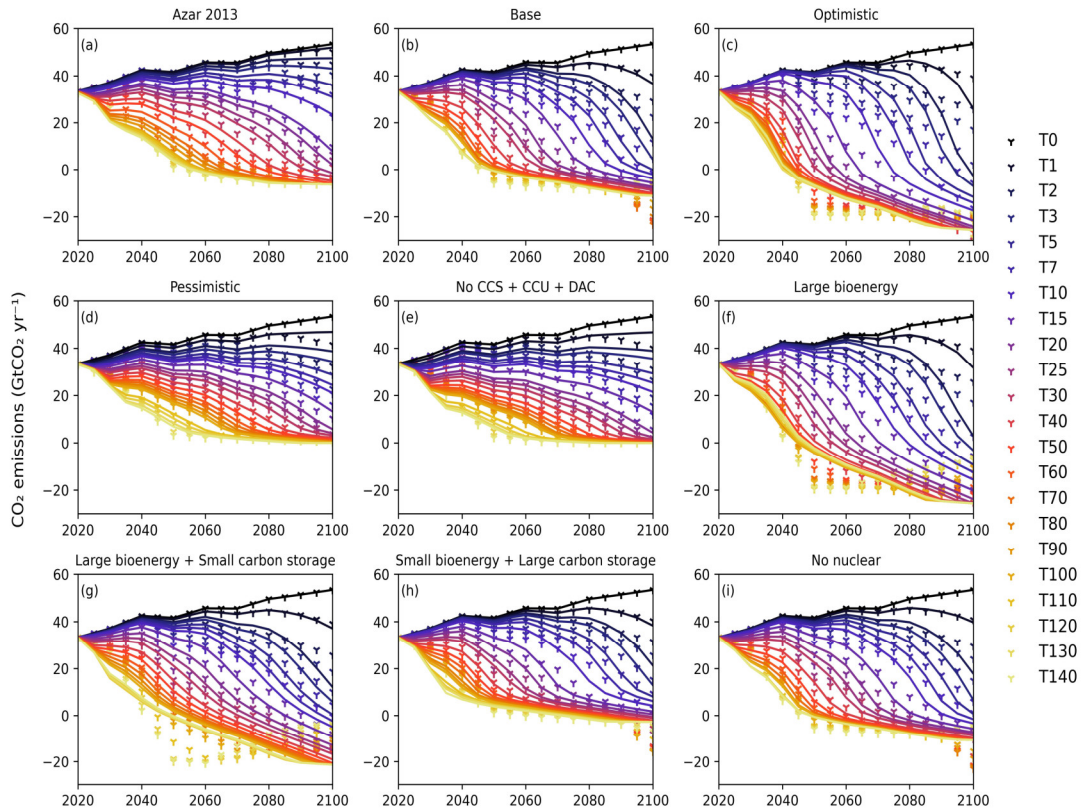

Figure S91. Test 1 – GET nine portfolios energy-related CO<sub>2</sub> validation results

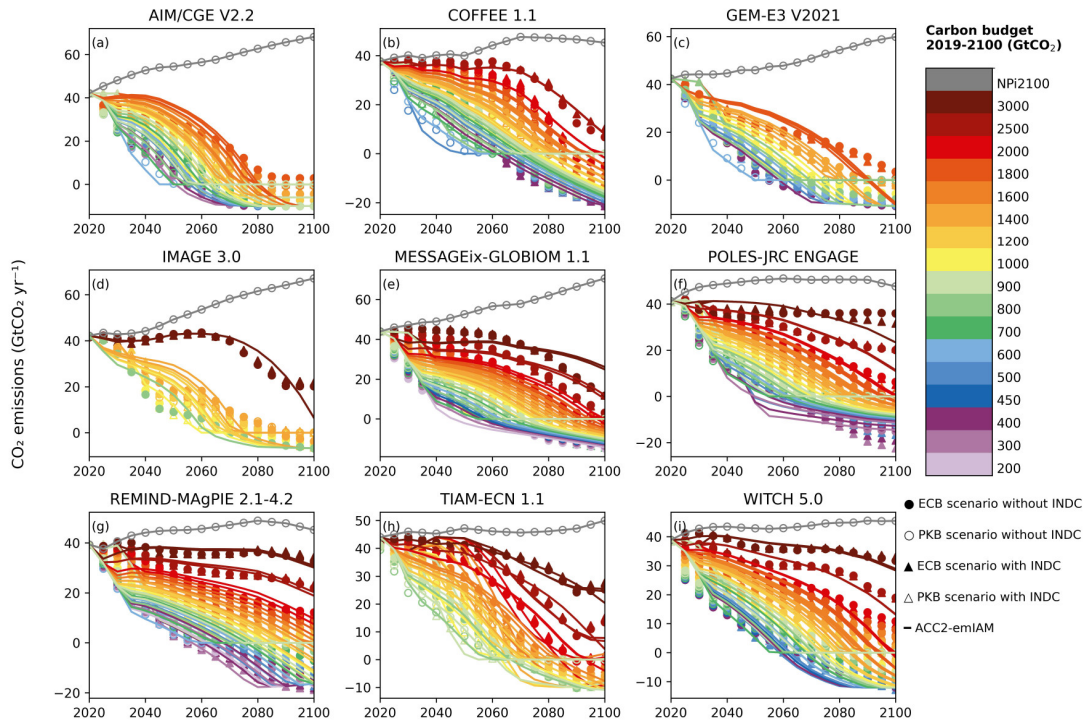

Figure S92. Test 1 – Global nine IAMs total anthropogenic CO<sub>2</sub> validation results

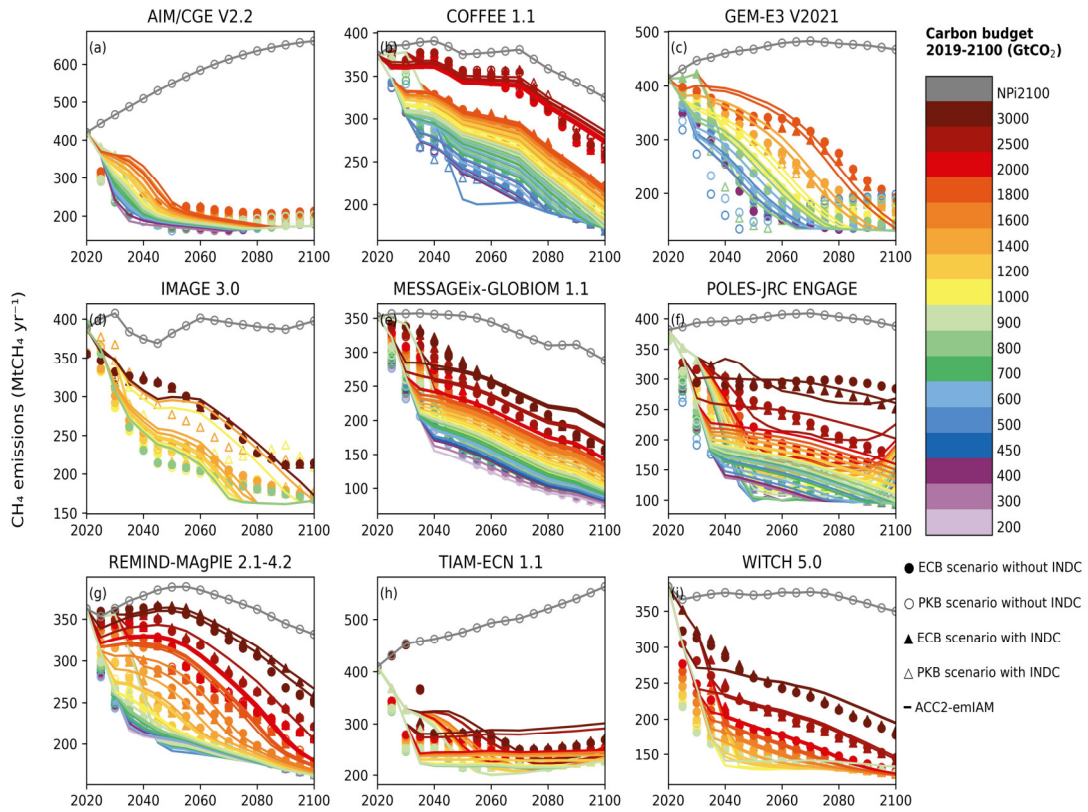

Figure S93. Test 1 – Global nine IAMs total anthropogenic CH<sub>4</sub> validation results

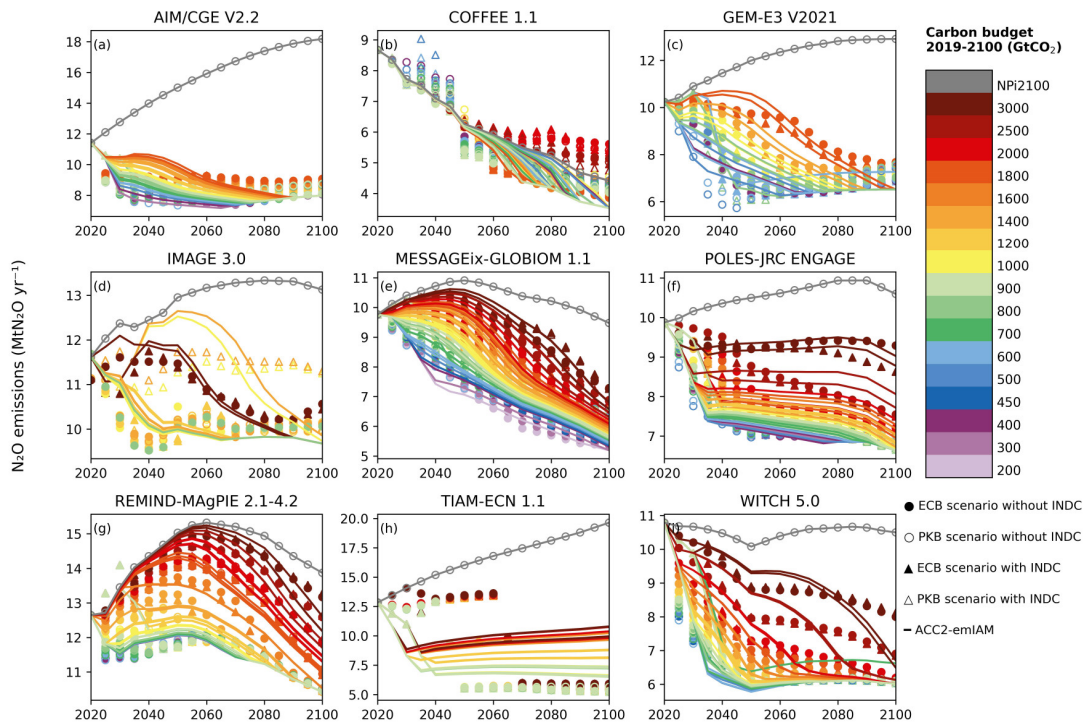

Figure S94. Test 1 – Global nine IAMs total anthropogenic N<sub>2</sub>O validation results

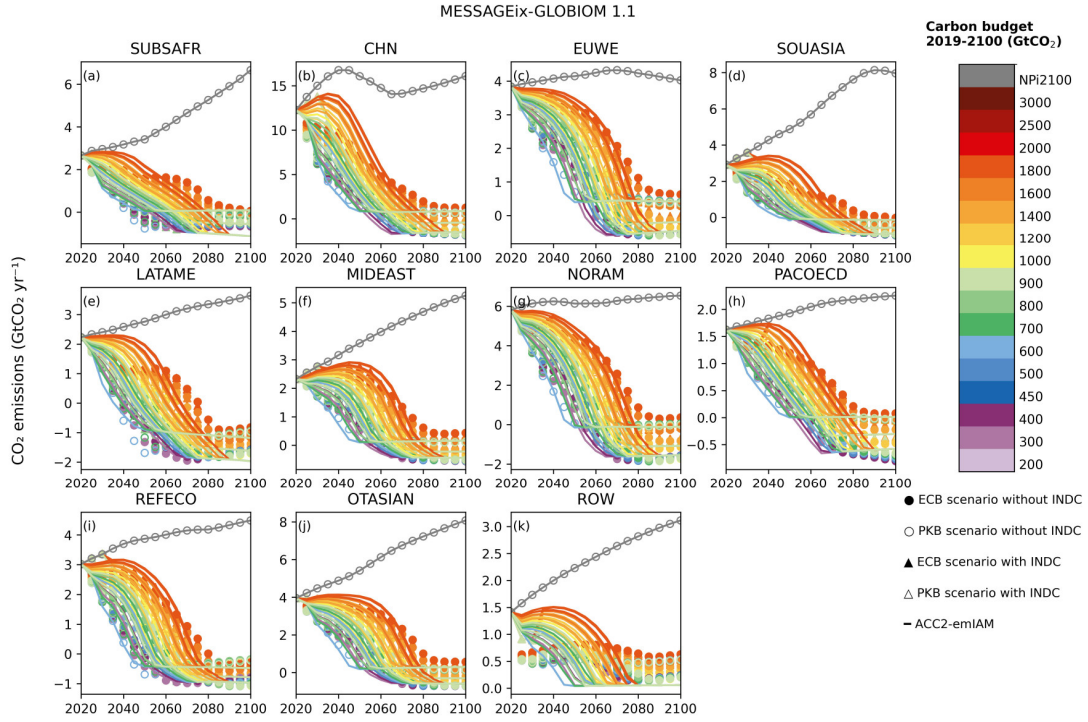

**Figure S95. Test 1 - Regional AIM total anthropogenic CO<sub>2</sub> validation results**

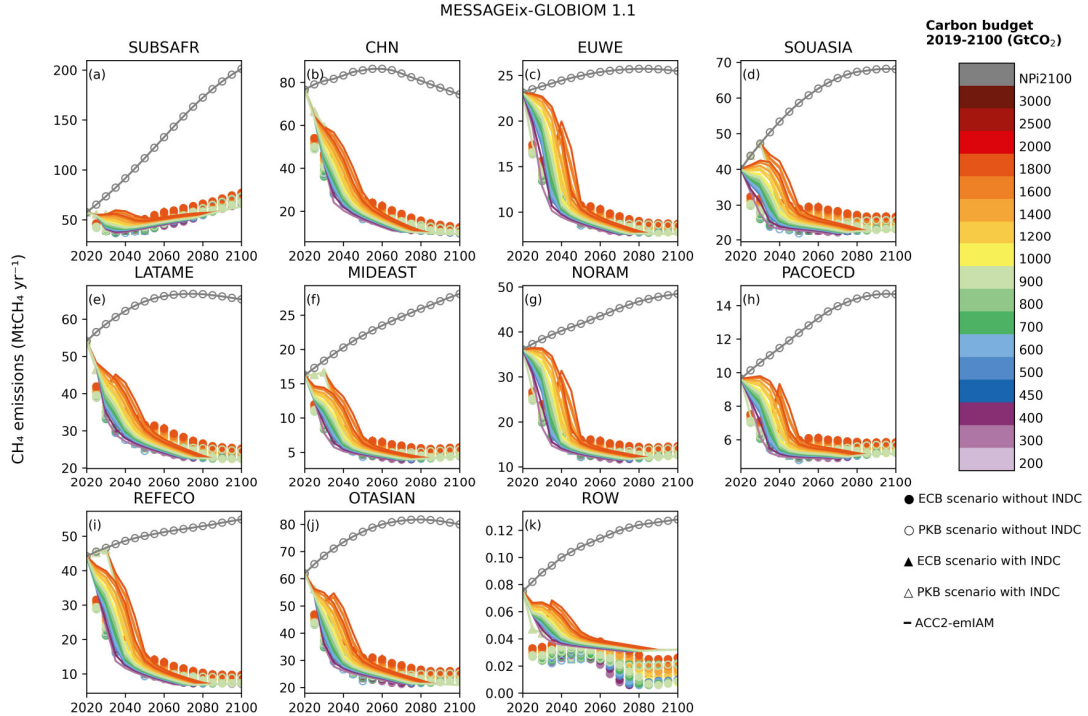

**Figure S96. Test 1 - Regional AIM total anthropogenic CH<sub>4</sub> validation results**



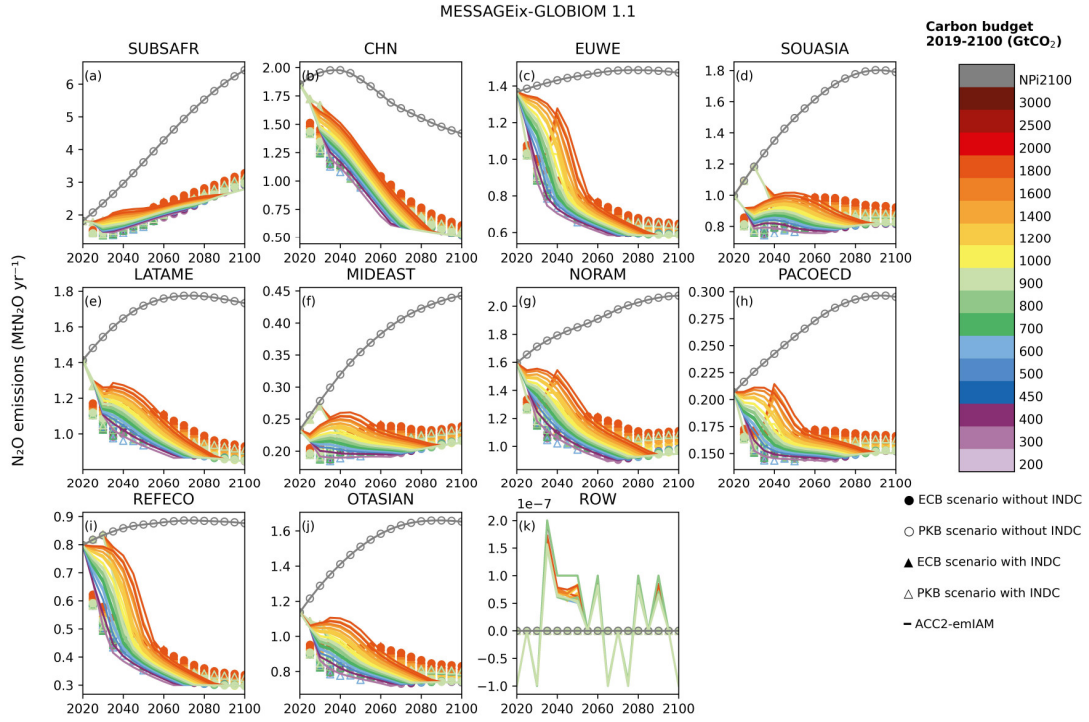

**Figure S97. Test 1 - Regional AIM total anthropogenic  $\text{N}_2\text{O}$  validation results**

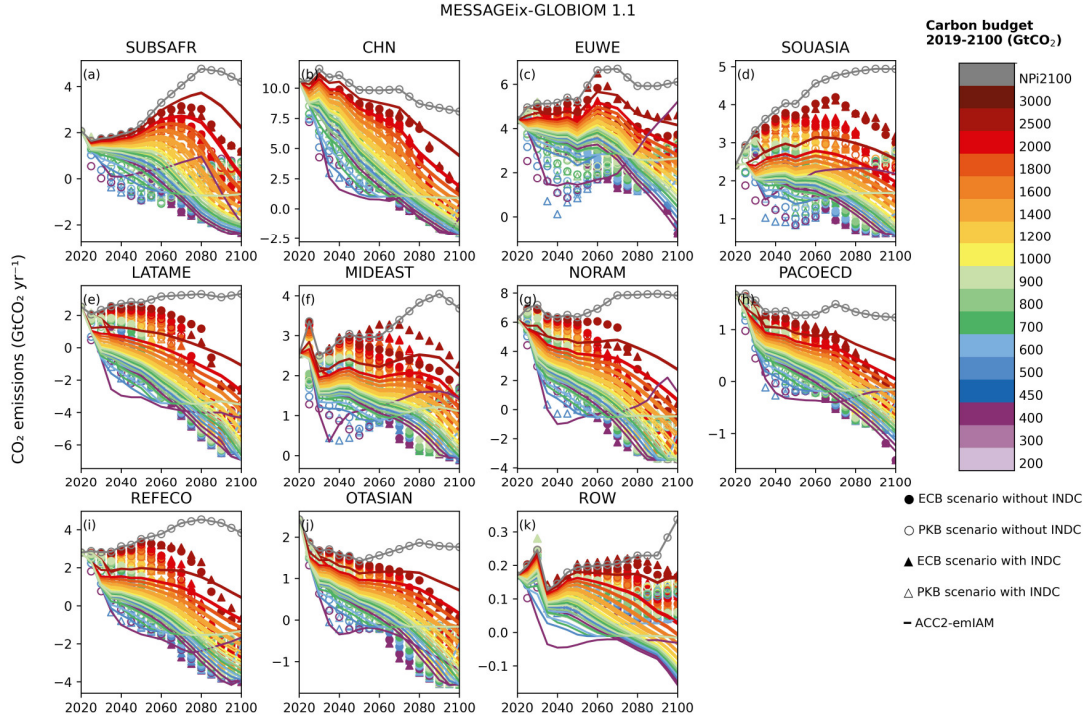

**Figure S98. Test 1 - Regional COFFEE total anthropogenic  $\text{CO}_2$  validation results**

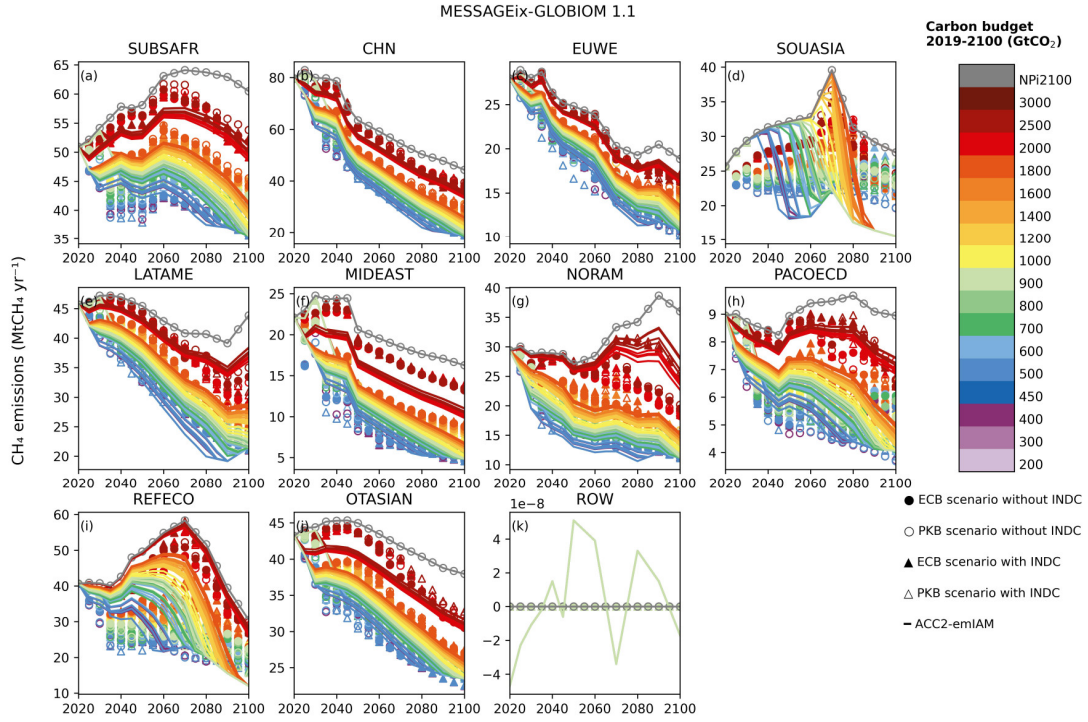

**Figure S99. Test 1 - Regional COFFEE total anthropogenic CH<sub>4</sub> validation results**

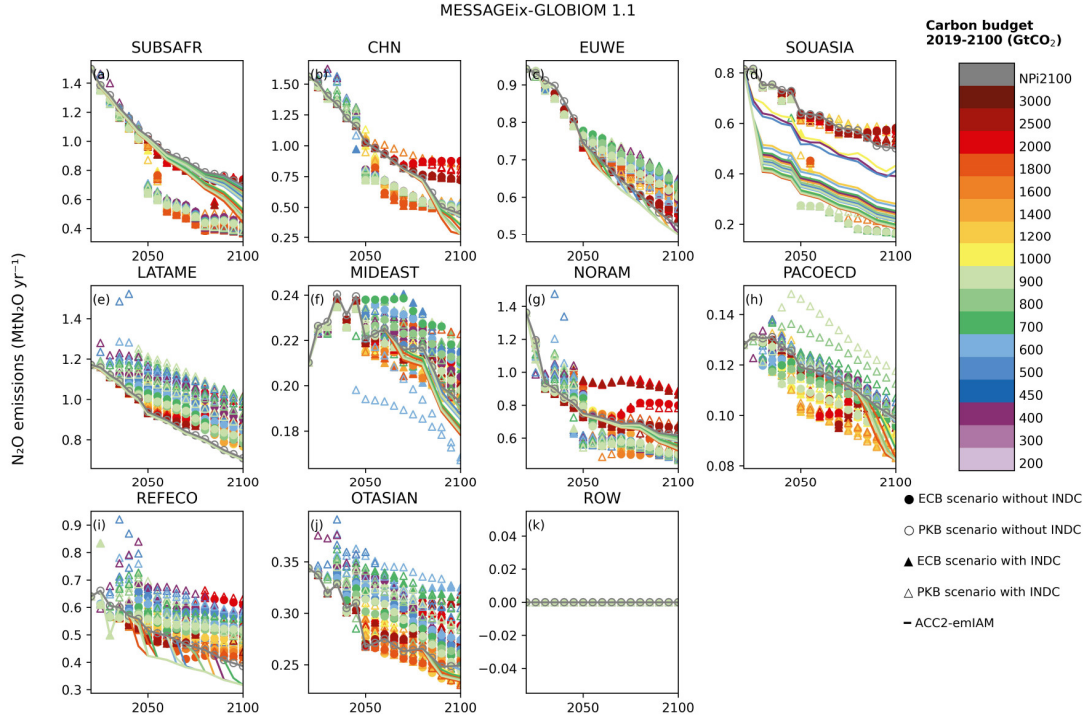

**Figure S100. Test 1 - Regional COFFEE total anthropogenic N<sub>2</sub>O validation results**

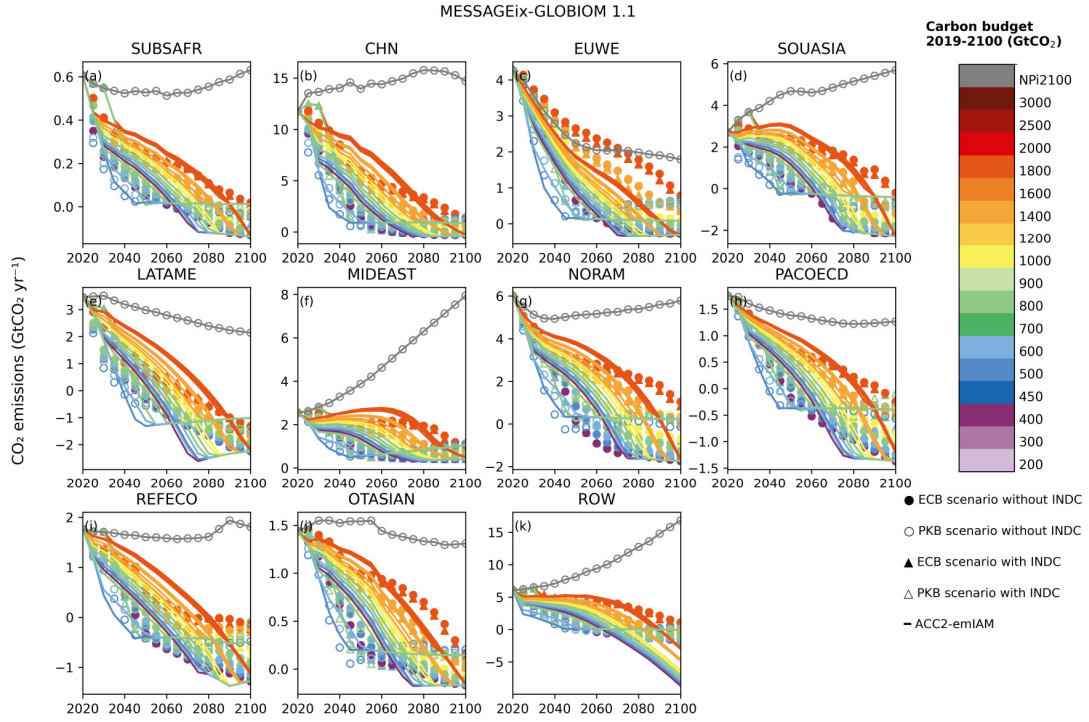

**Figure S101. Test 1 - Regional GEM total anthropogenic CO<sub>2</sub> validation results**

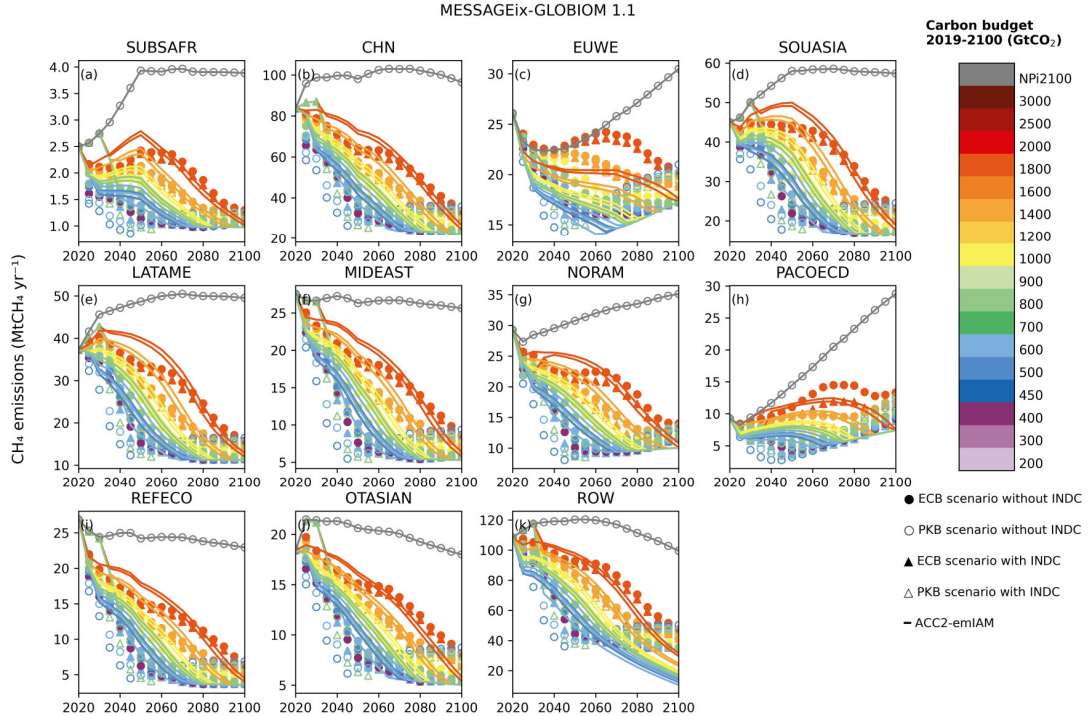

**Figure S102. Test 1 - Regional GEM total anthropogenic CH<sub>4</sub> validation results**



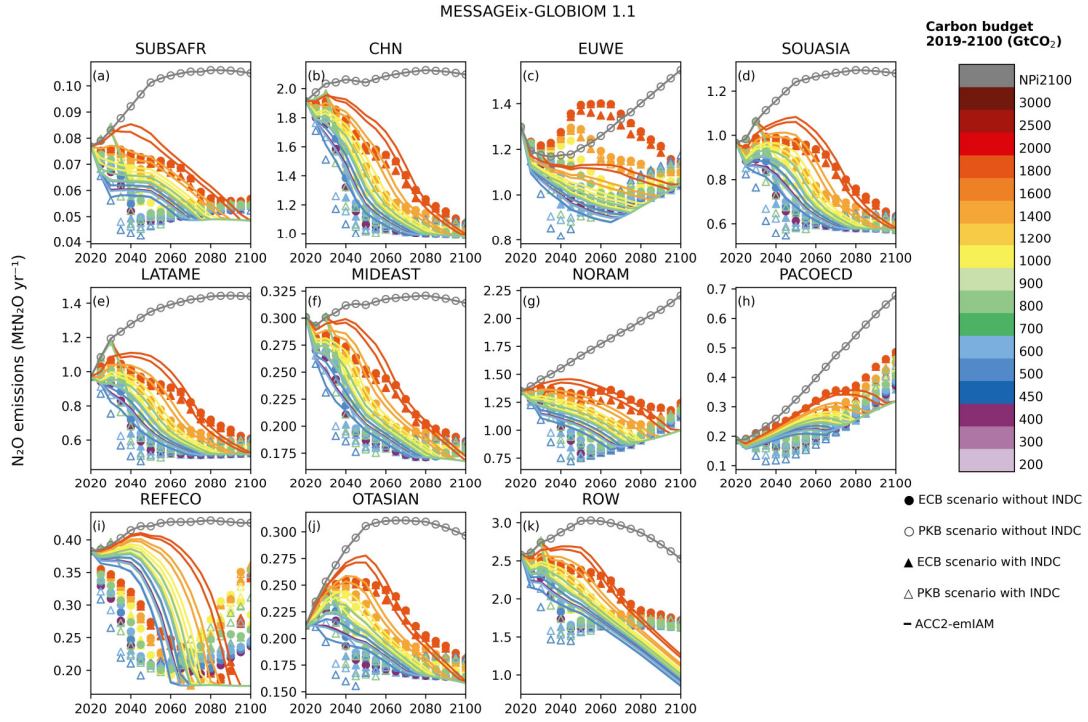

**Figure S103. Test 1 - Regional GEM total anthropogenic N<sub>2</sub>O validation results**

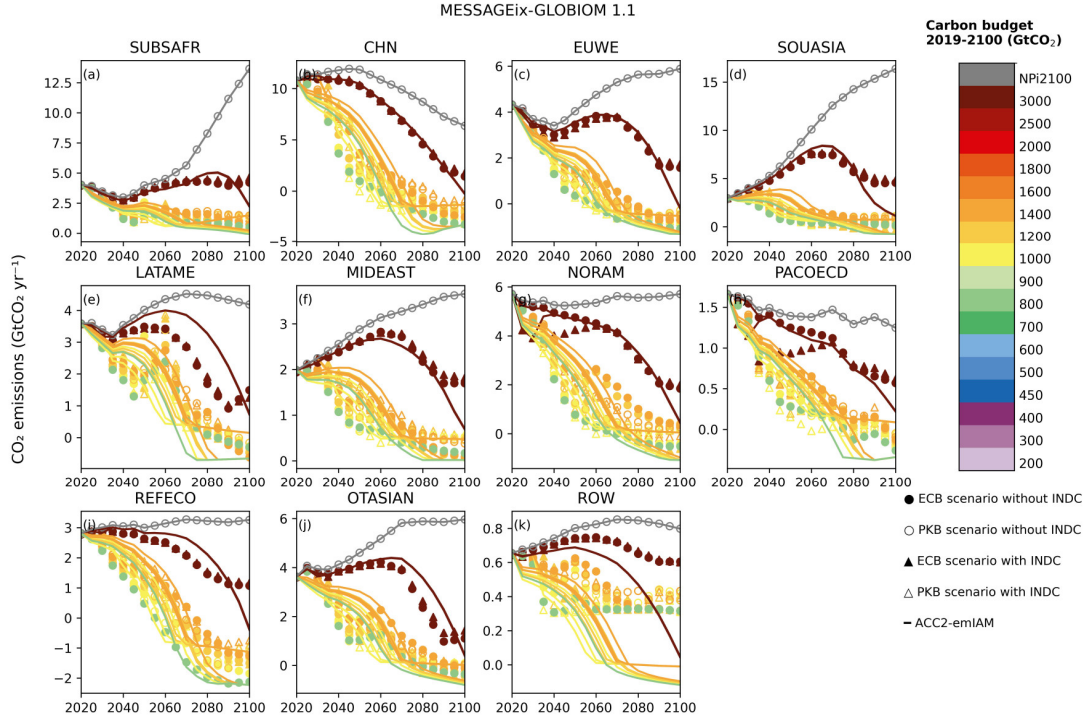

**Figure S104. Test 1 - Regional IMAGE total anthropogenic CO<sub>2</sub> validation result**



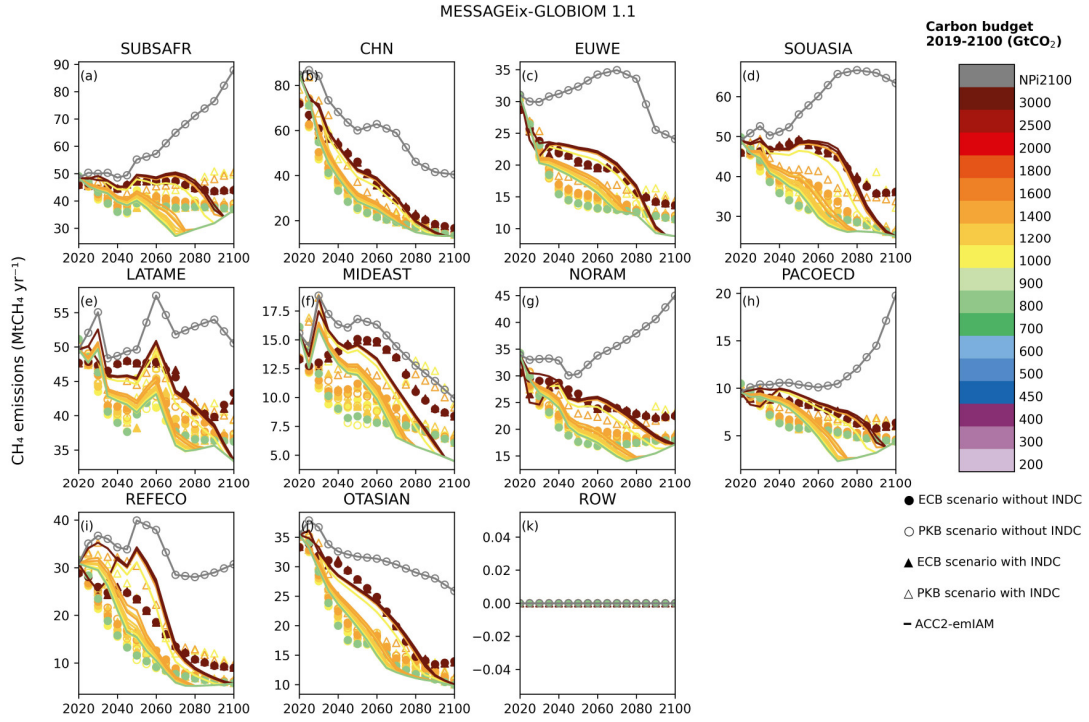

**Figure S105. Test 1 - Regional IMAGE total anthropogenic CH<sub>4</sub> validation results**

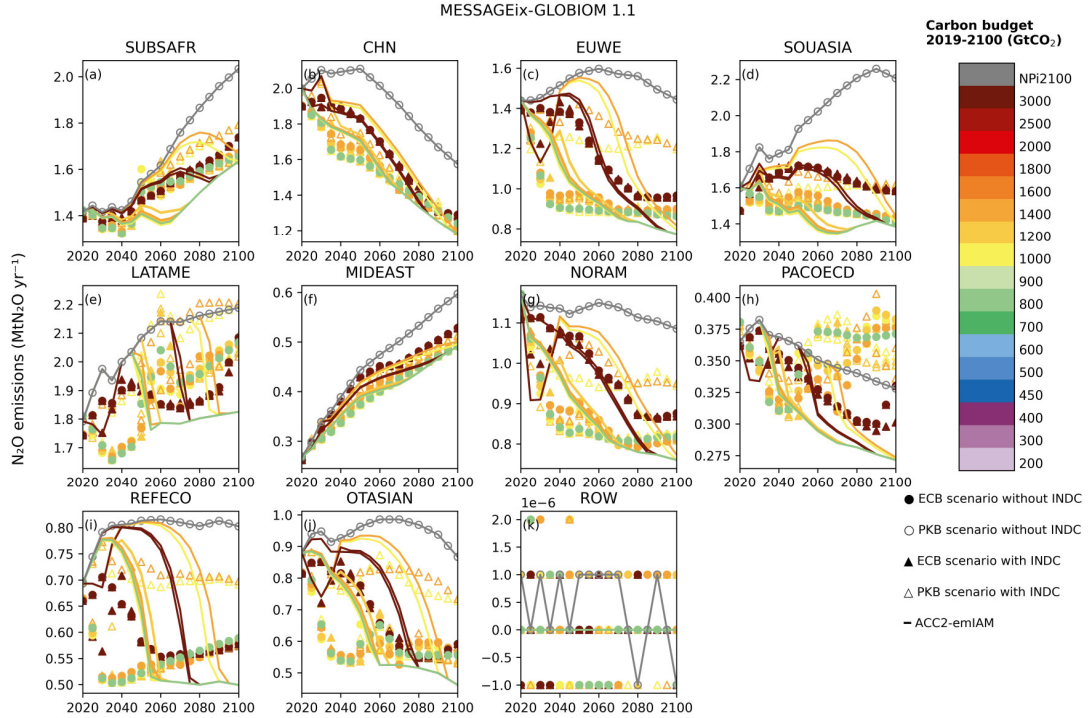

**Figure S106. Test 1 - Regional IMAGE total anthropogenic N<sub>2</sub>O validation results**

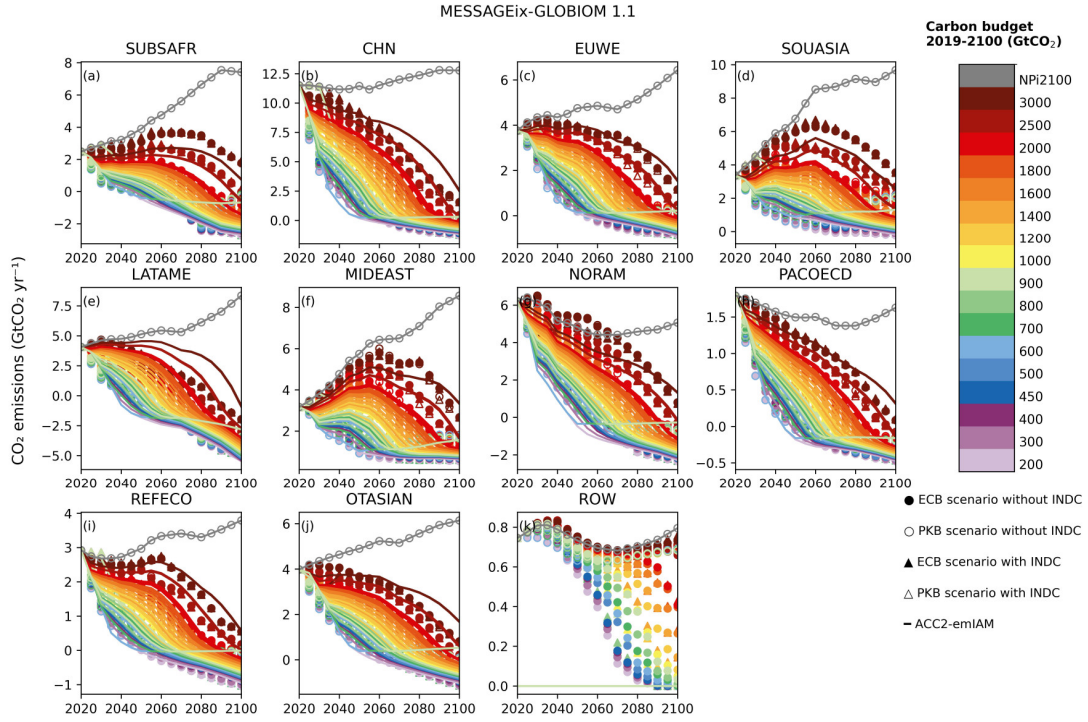

**Figure S107. Test 1 - Regional MESSAGE total anthropogenic CO<sub>2</sub> validation results**

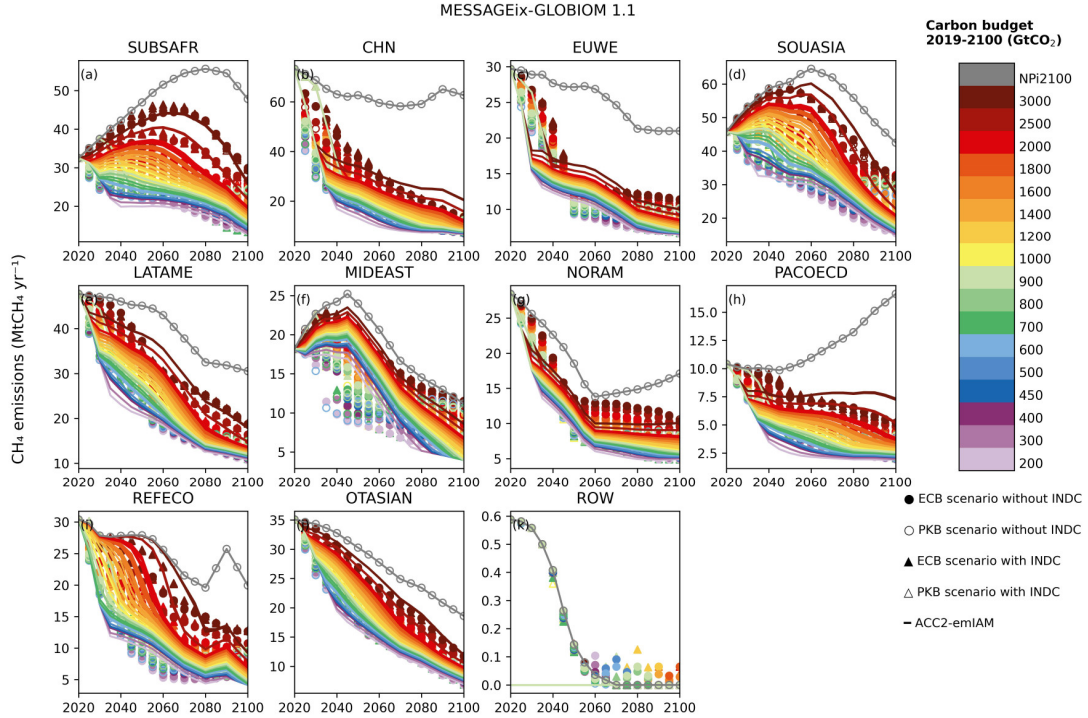

**Figure S108. Test 1 - Regional MESSAGE total anthropogenic CH<sub>4</sub> validation results**

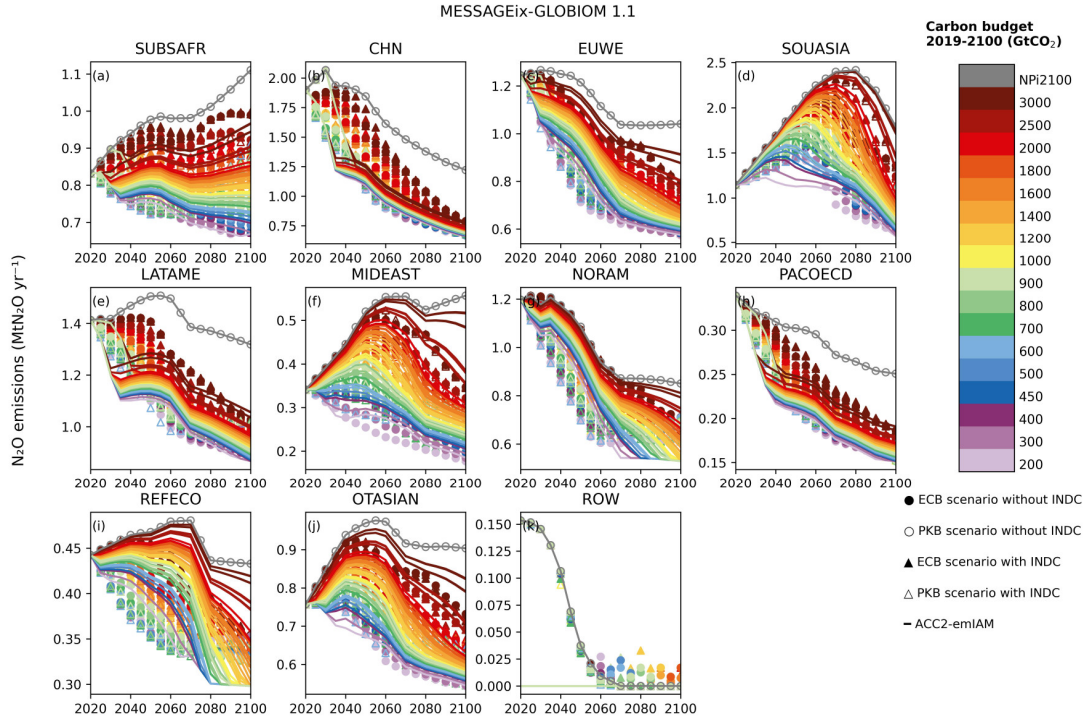

**Figure S109. Test 1 - Regional MESSAGE total anthropogenic N<sub>2</sub>O validation results**

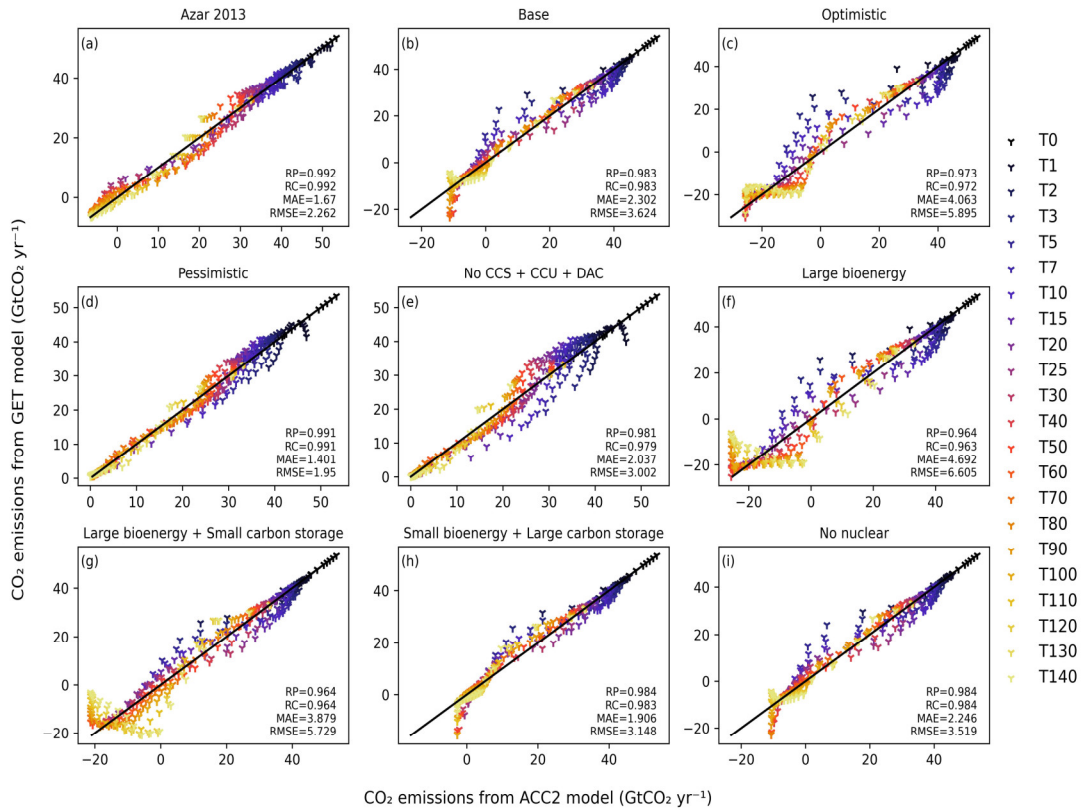

**Figure S110. Test 1 – GET - Reproducibility of energy-related CO<sub>2</sub>**



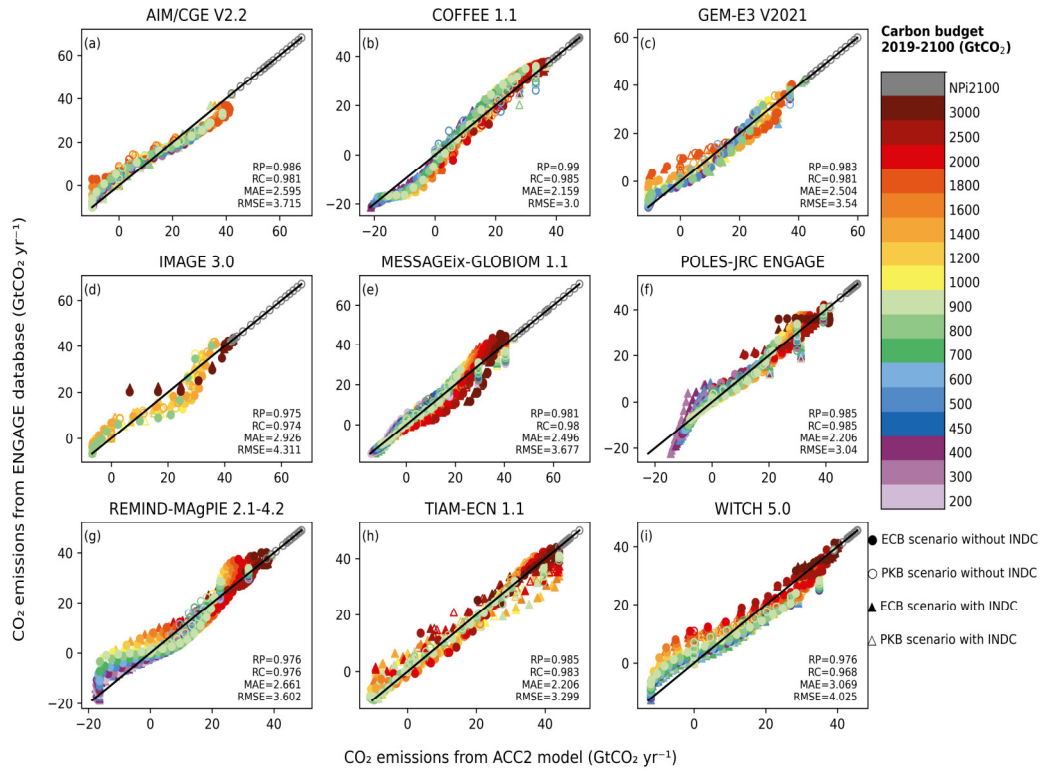

Figure S111. Test 1 - Global nine IAMs - Reproducibility of total anthropogenic CO<sub>2</sub>

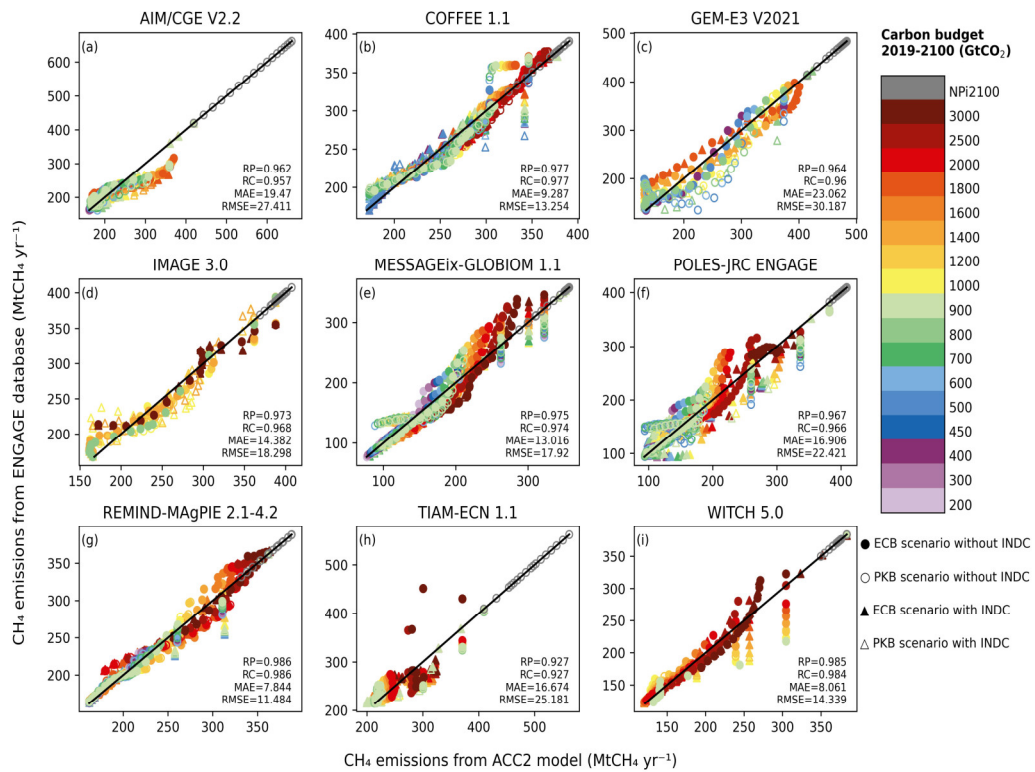

Figure S112. Test 1 - Global nine IAMs - Reproducibility of total anthropogenic CH<sub>4</sub>

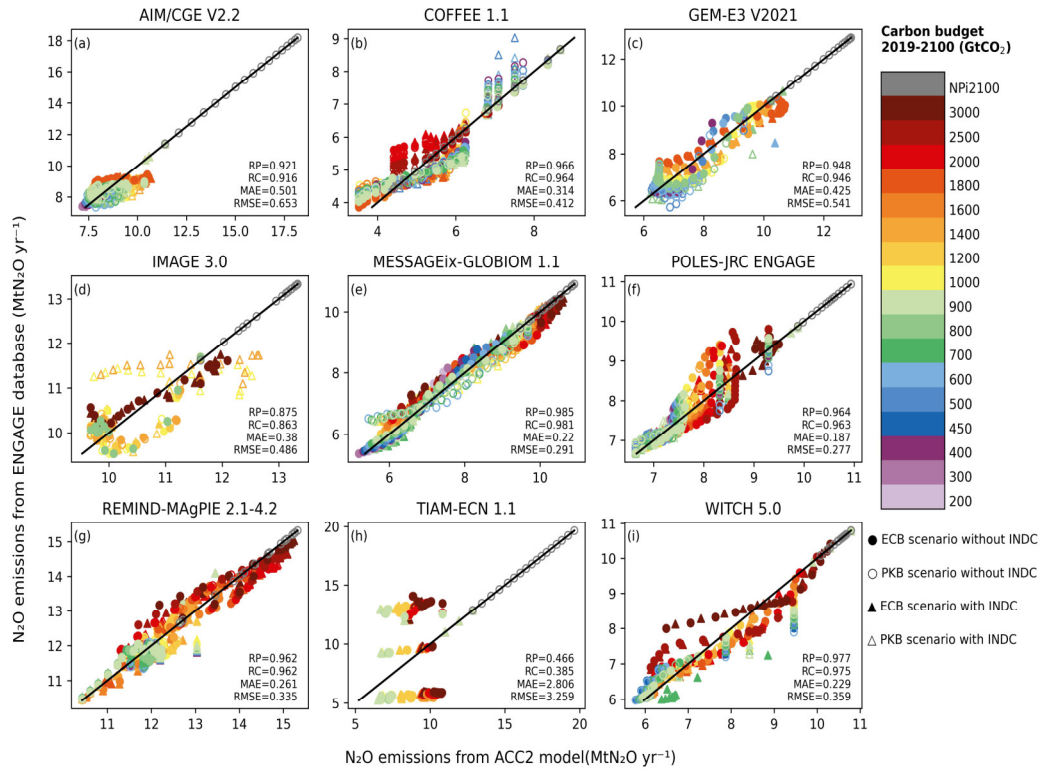

Figure S113. Test 1 - Global nine IAMs - Reproducibility of total anthropogenic  $N_2O$

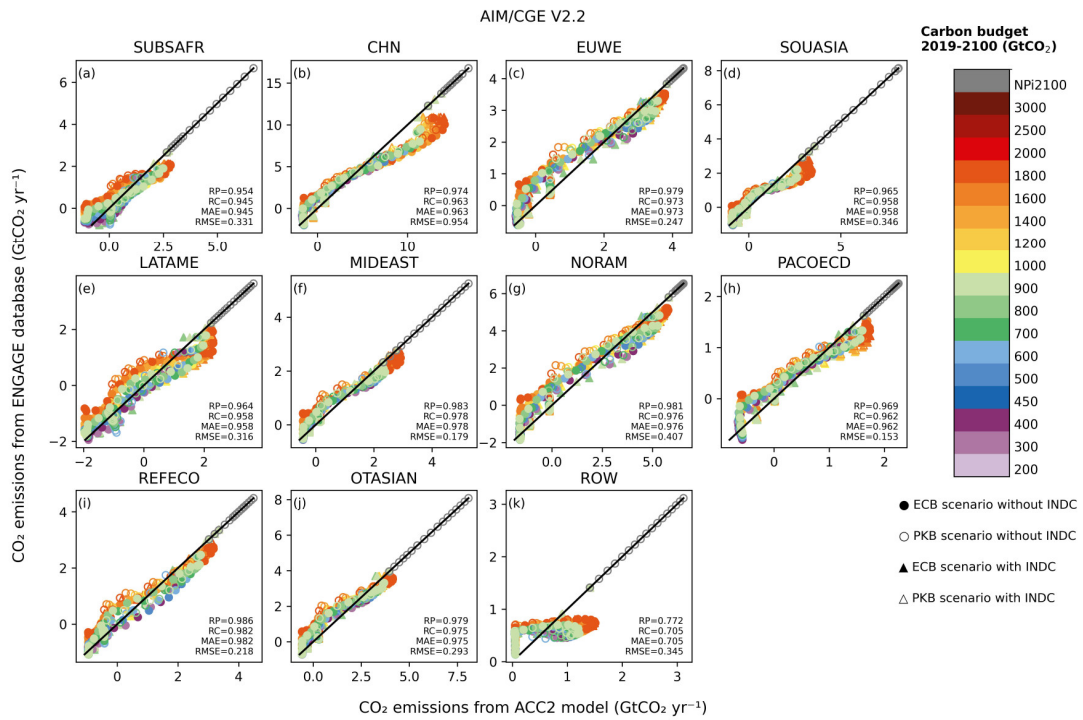

Figure S114. Test 1 - Regional AIM - Reproducibility of total anthropogenic  $CO_2$

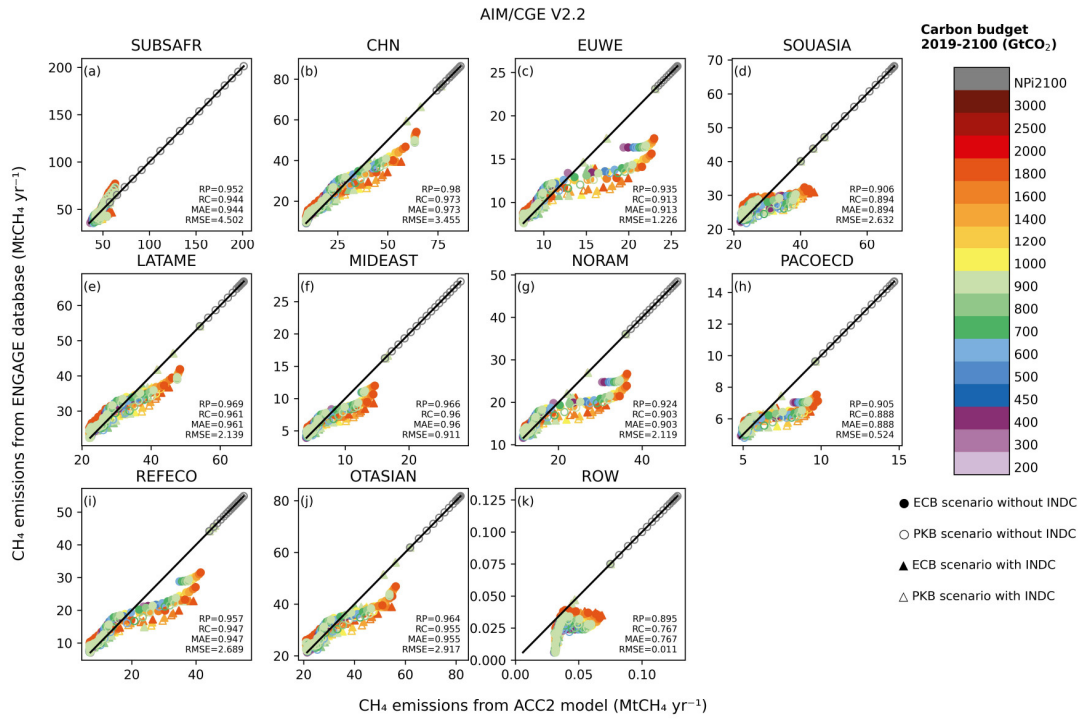

**Figure S115. Test 1 - Regional AIM - Reproducibility of total anthropogenic CH<sub>4</sub>**

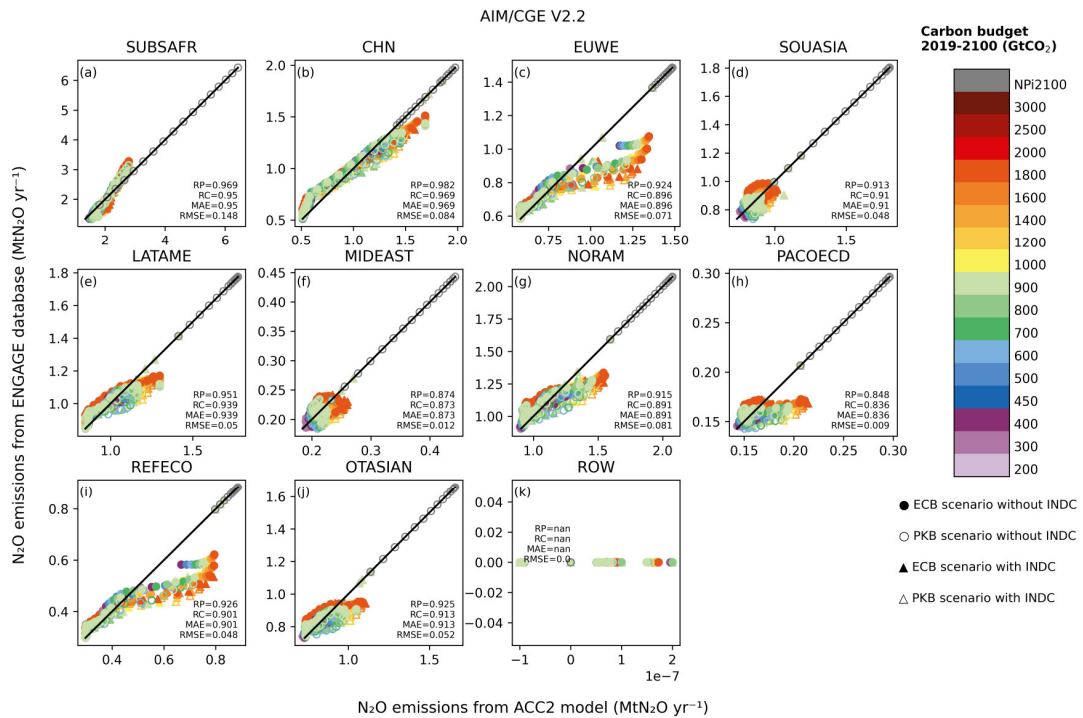

**Figure S116. Test 1 - Regional AIM - Reproducibility of total anthropogenic N<sub>2</sub>O**



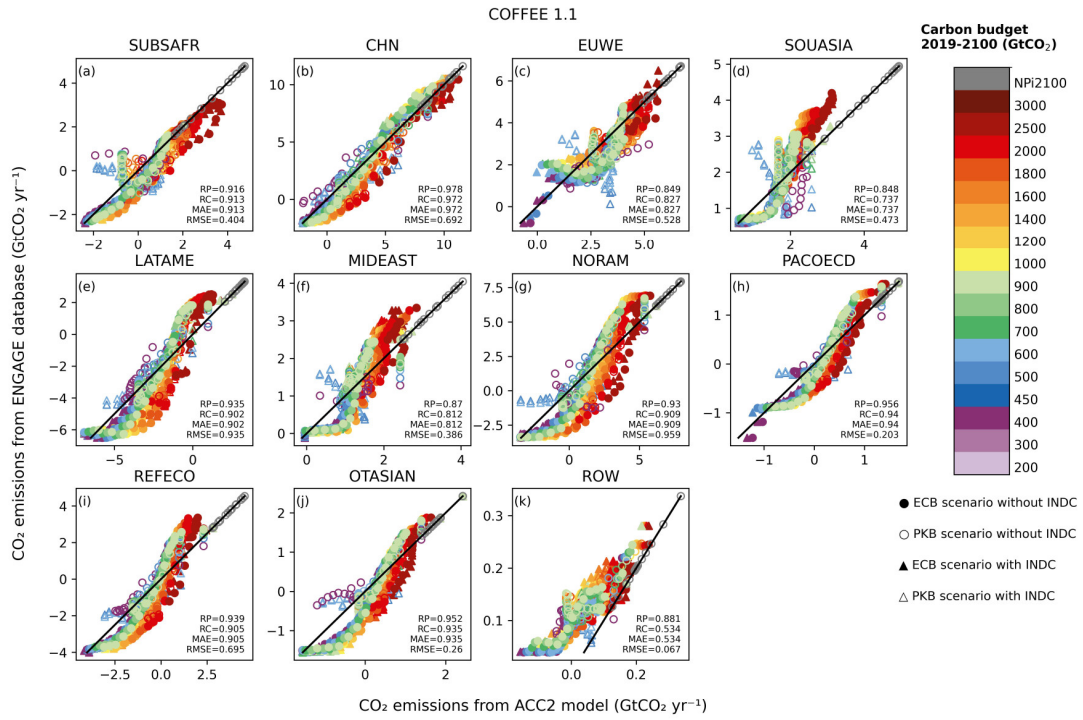

**Figure S117. Test 1 - Regional COFFEE - Reproducibility of total anthropogenic CO<sub>2</sub>**

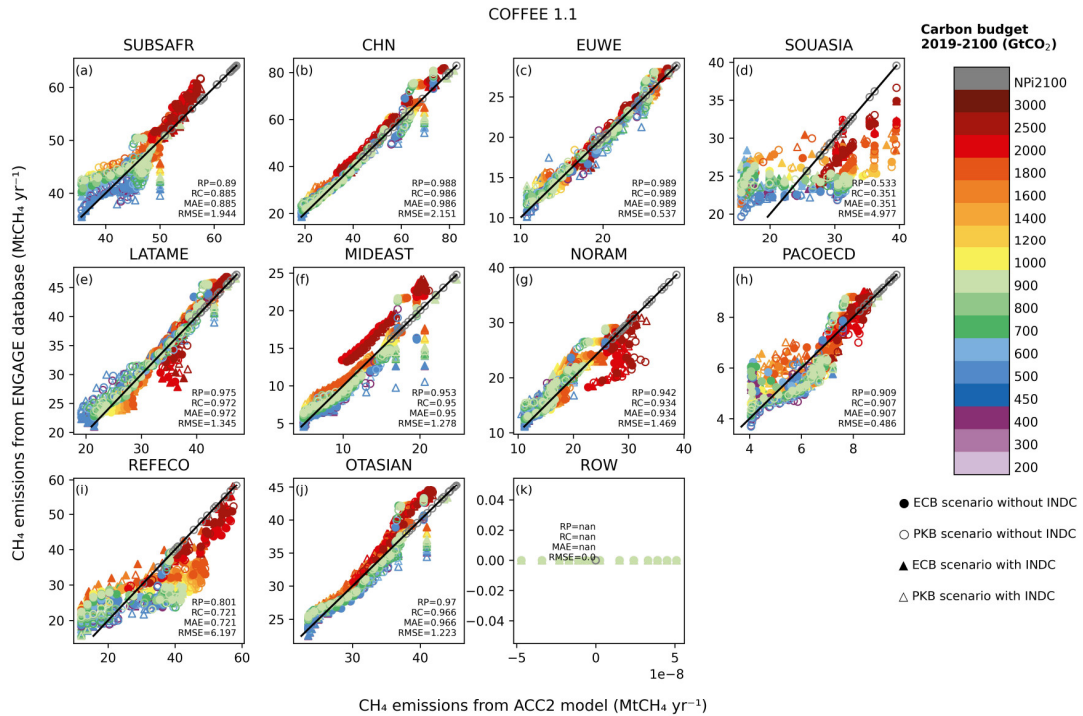

**Figure S118. Test 1 - Regional COFFEE - Reproducibility of total anthropogenic CH<sub>4</sub>**

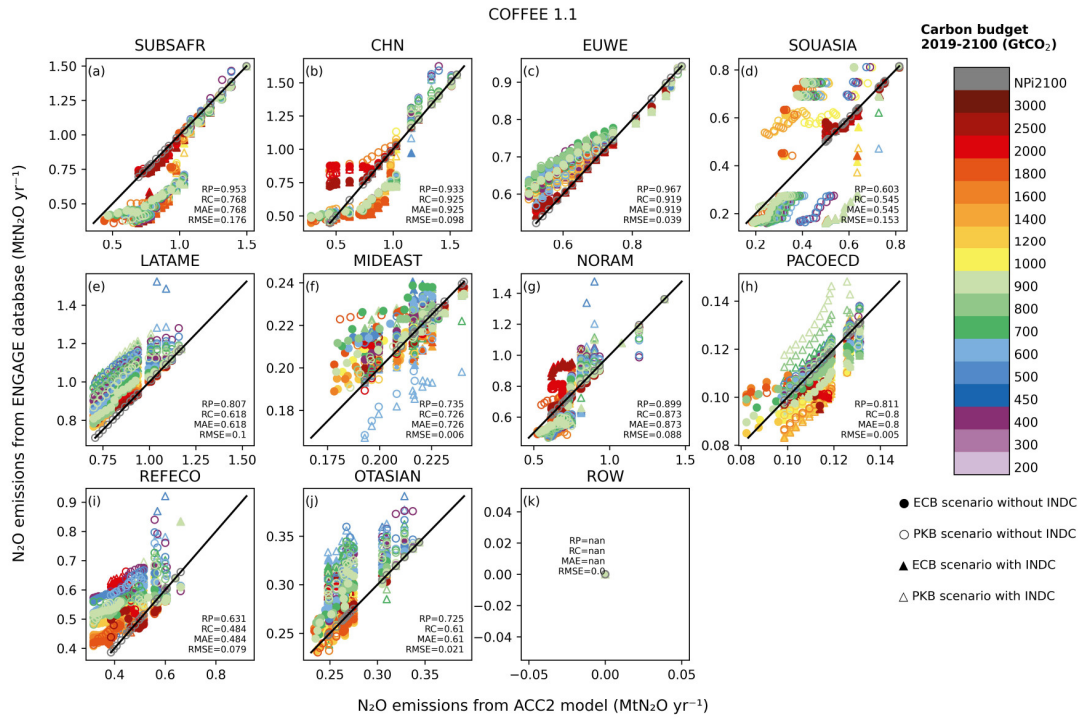

**Figure S119. Test 1 - Regional COFFEE - Reproducibility of total anthropogenic N<sub>2</sub>O**

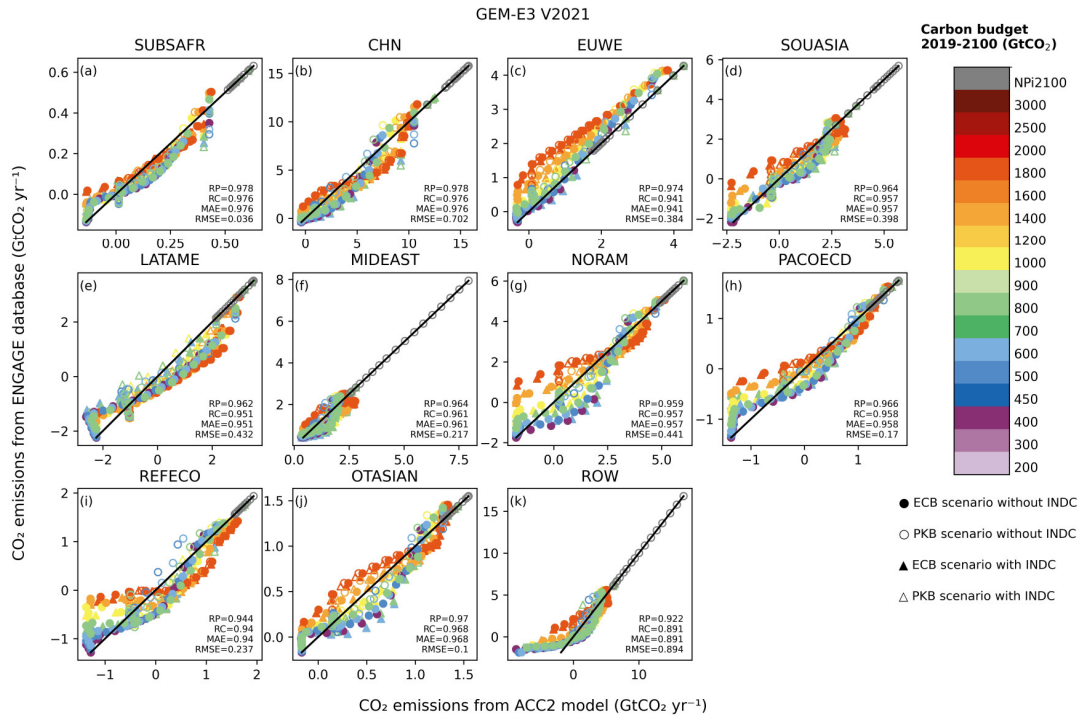

**Figure S120. Test 1 - Regional GEM - Reproducibility of total anthropogenic CO<sub>2</sub>**

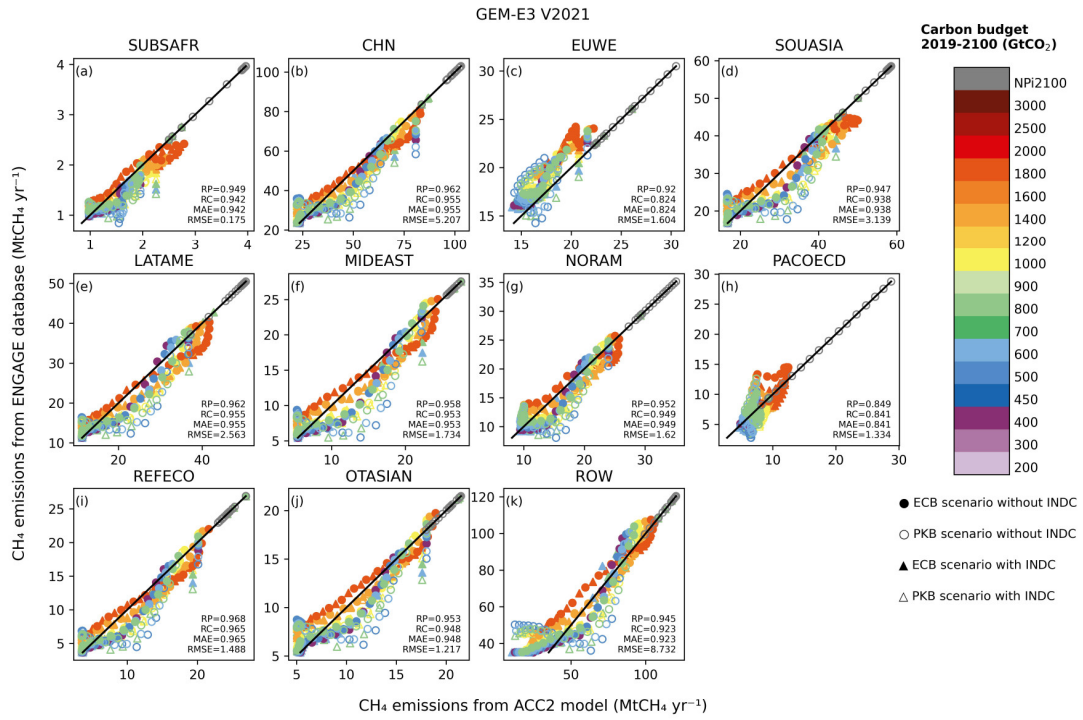

**Figure S121. Test 1 - Regional GEM - Reproducibility of total anthropogenic CH<sub>4</sub>**

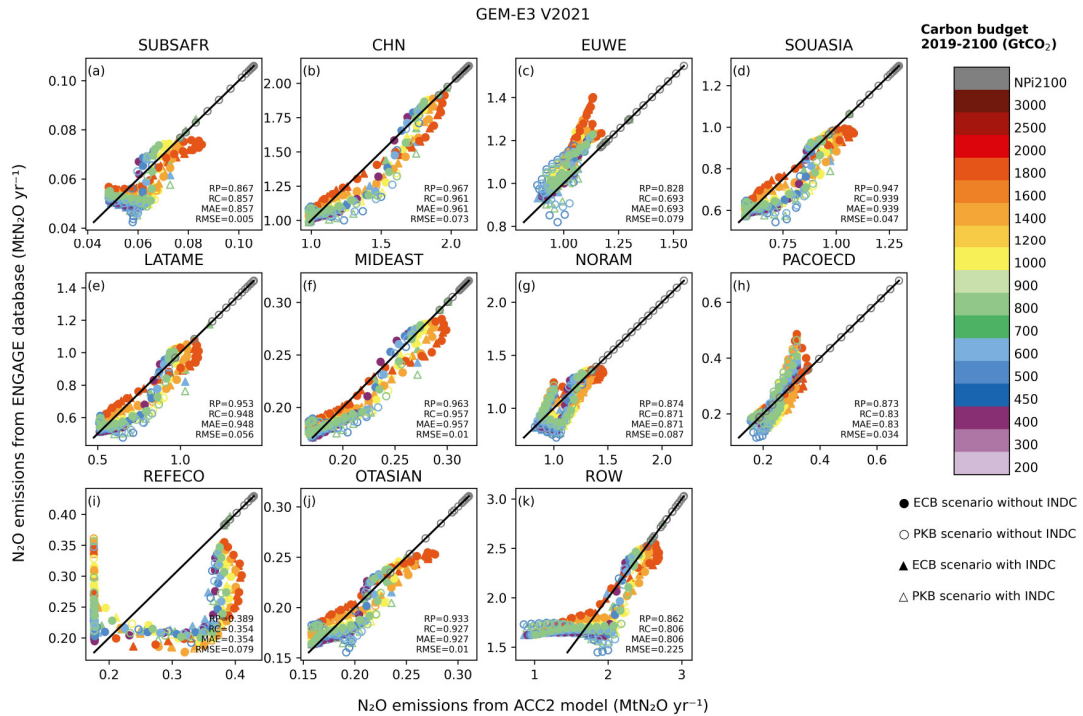

**Figure S122. Test 1 - Regional GEM - Reproducibility of total anthropogenic N<sub>2</sub>O**

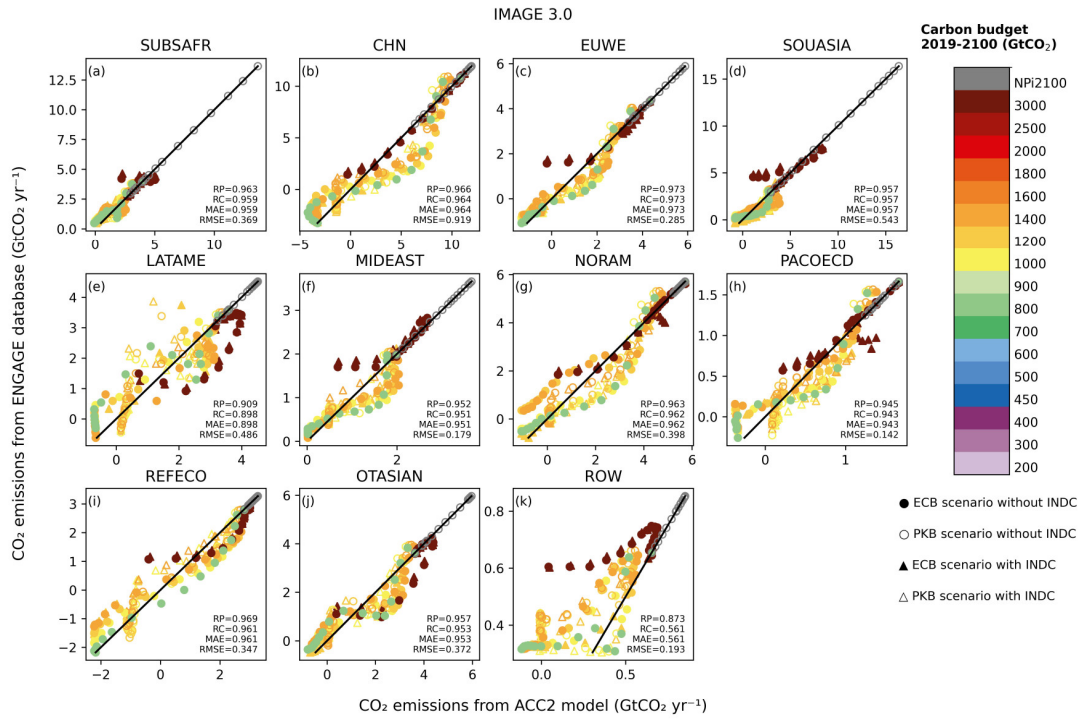

**Figure S123. Test 1 - Regional IMAGE - Reproducibility of total anthropogenic CO<sub>2</sub>**

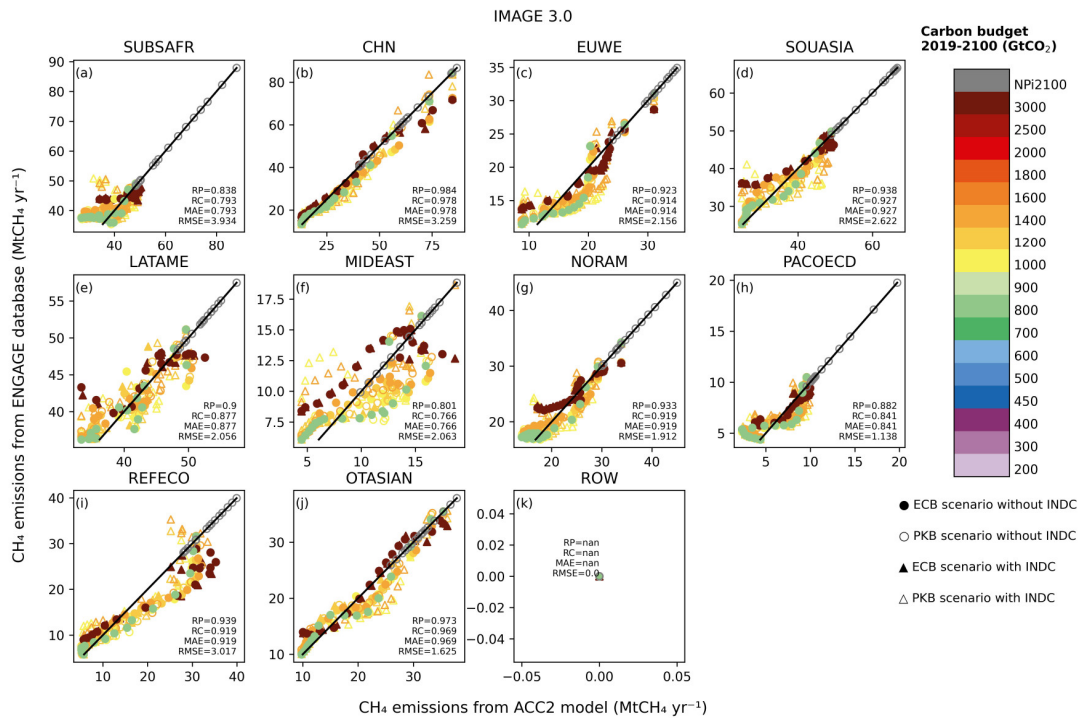

**Figure S124. Test 1 - Regional IMAGE - Reproducibility of total anthropogenic CH<sub>4</sub>**



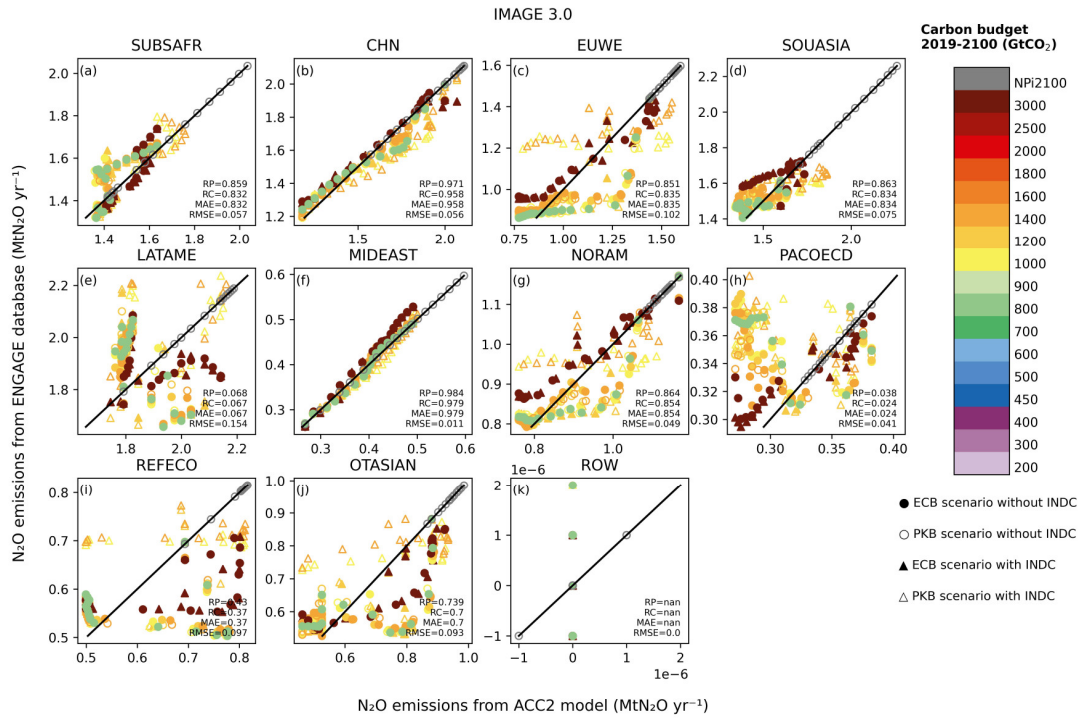

**Figure S125. Test 1 - Regional IMAGE - Reproducibility of total anthropogenic N<sub>2</sub>O**

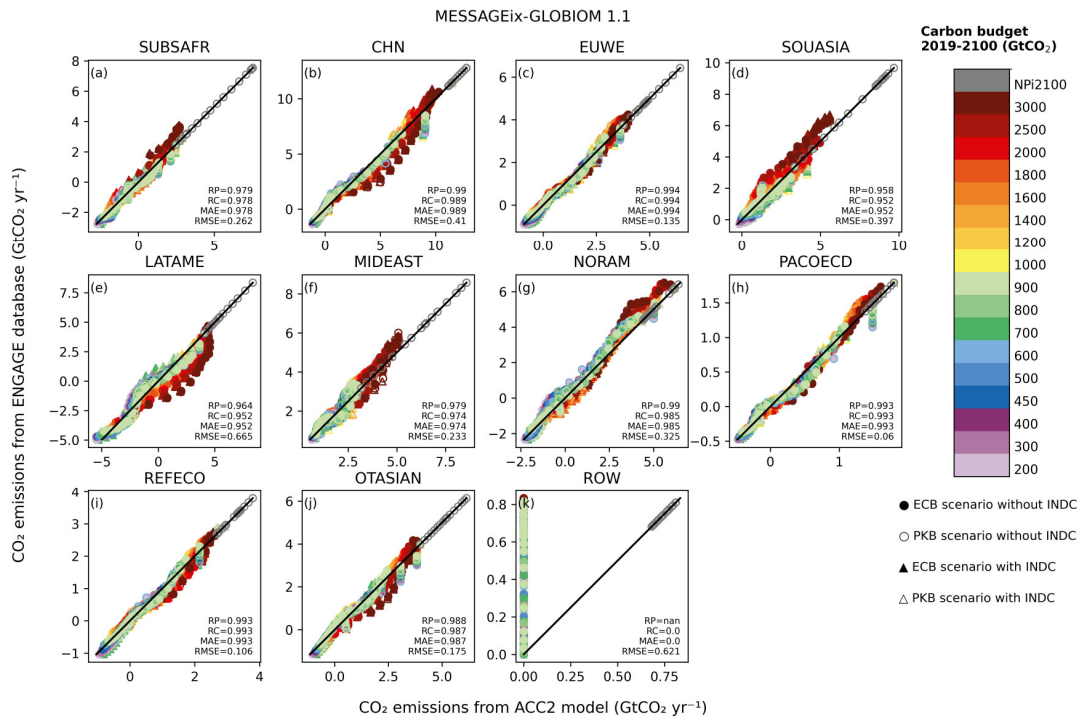

**Figure S126. Test 1 - Regional MESSAGE - Reproducibility of total anthropogenic CO<sub>2</sub>**

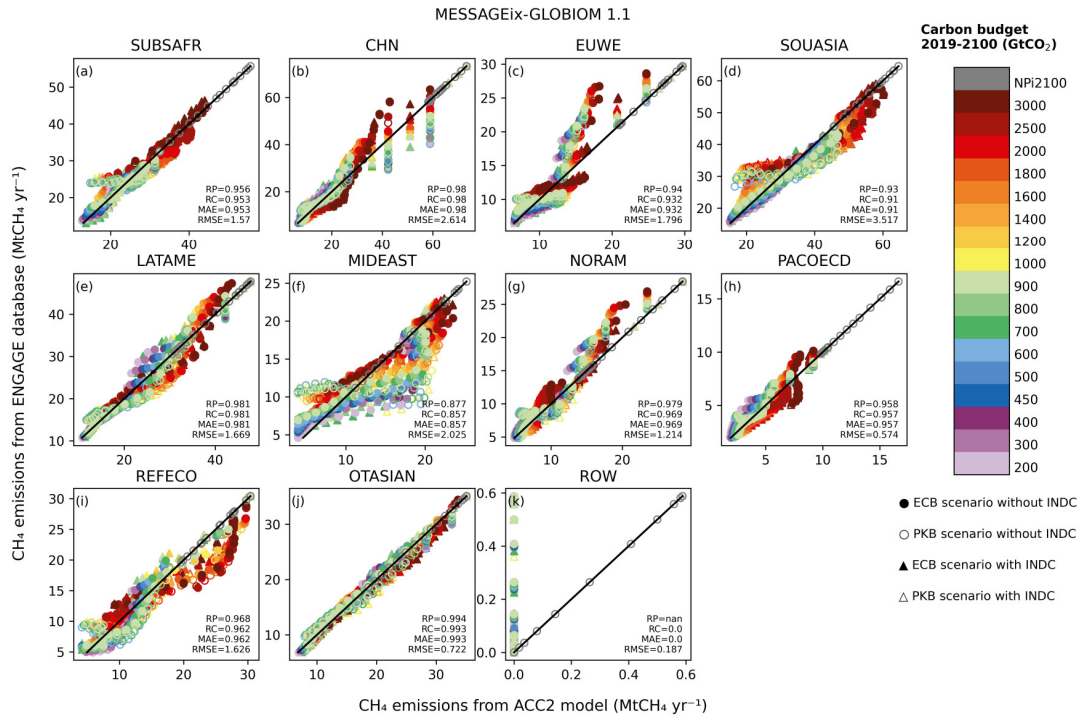

**Figure S127. Test 1 - Regional MESSAGE - Reproducibility of total anthropogenic CH<sub>4</sub>**

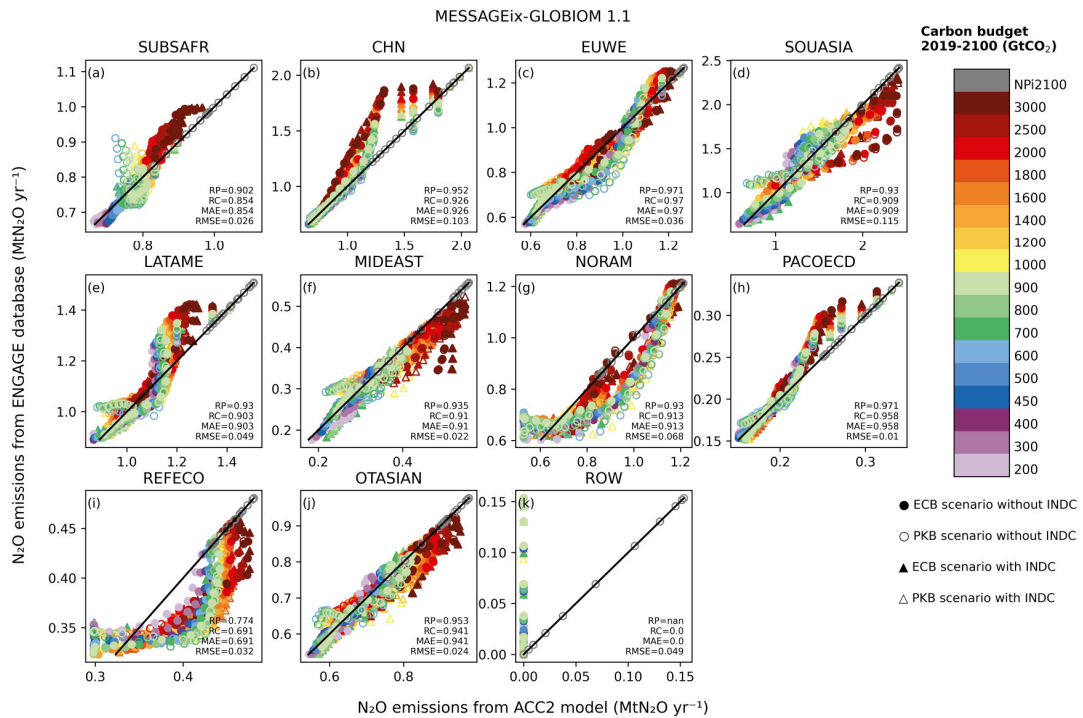

**Figure S128. Test 1 - Regional MESSAGE - Reproducibility of total anthropogenic N<sub>2</sub>O**



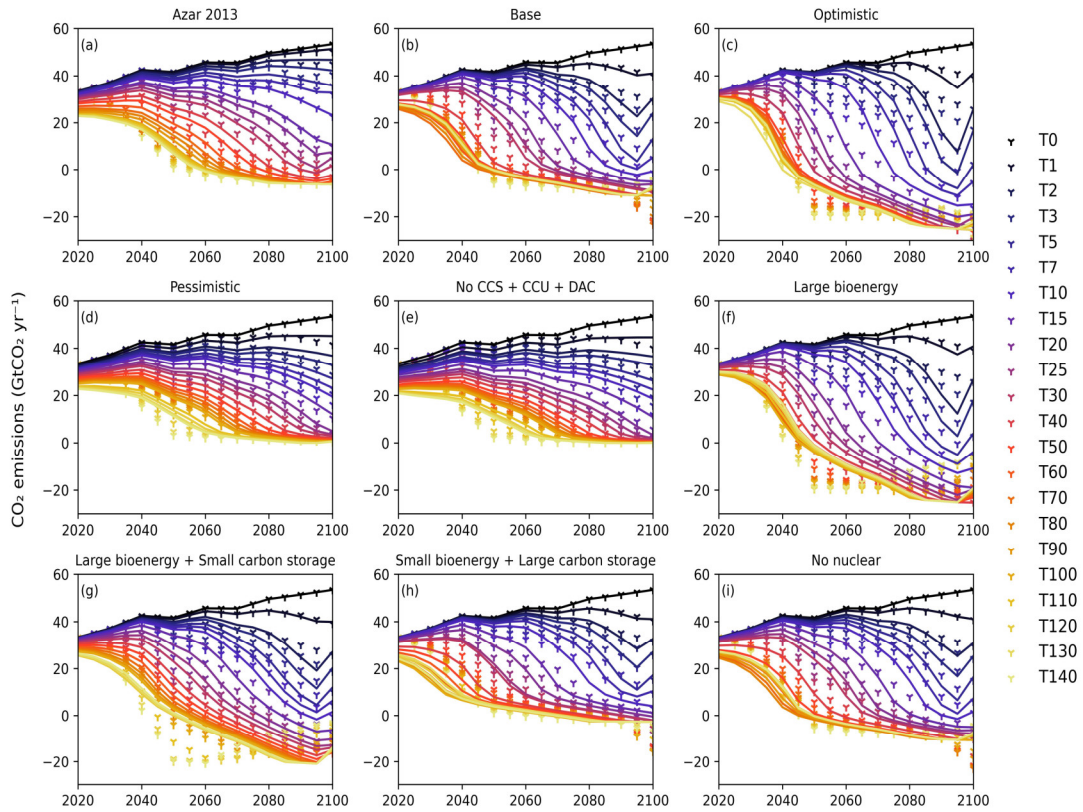

Figure S129. Test 2 – GET nine portfolios energy-related CO<sub>2</sub> validation results

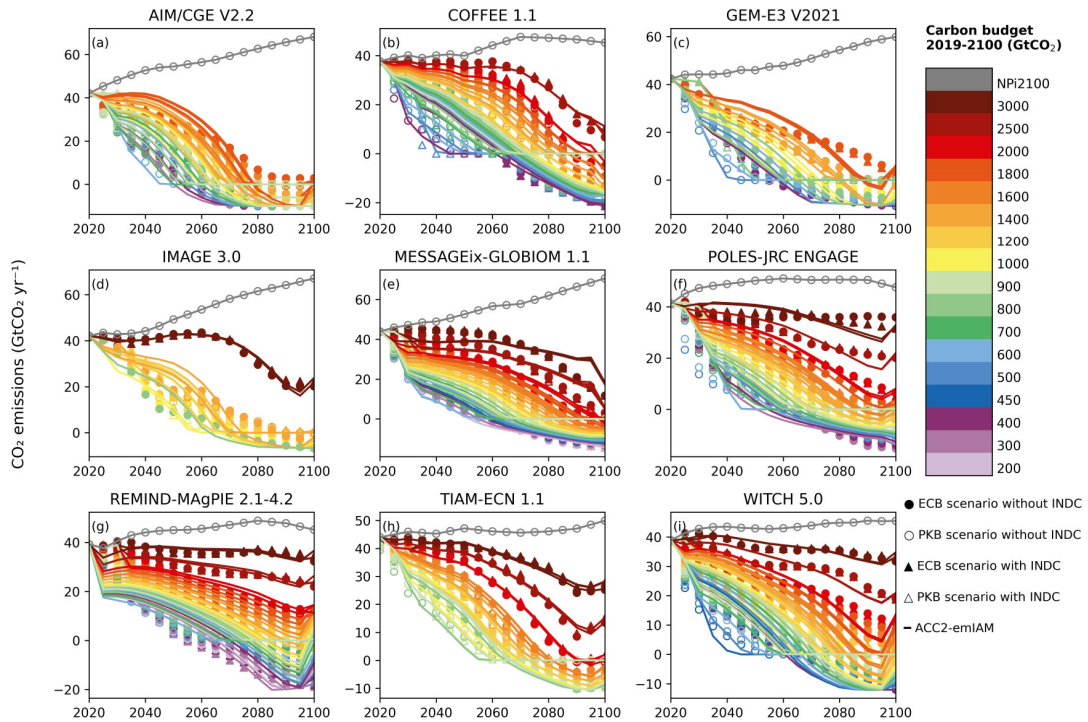

Figure S130. Test 2 – Global nine IAMs total anthropogenic CO<sub>2</sub> validation results

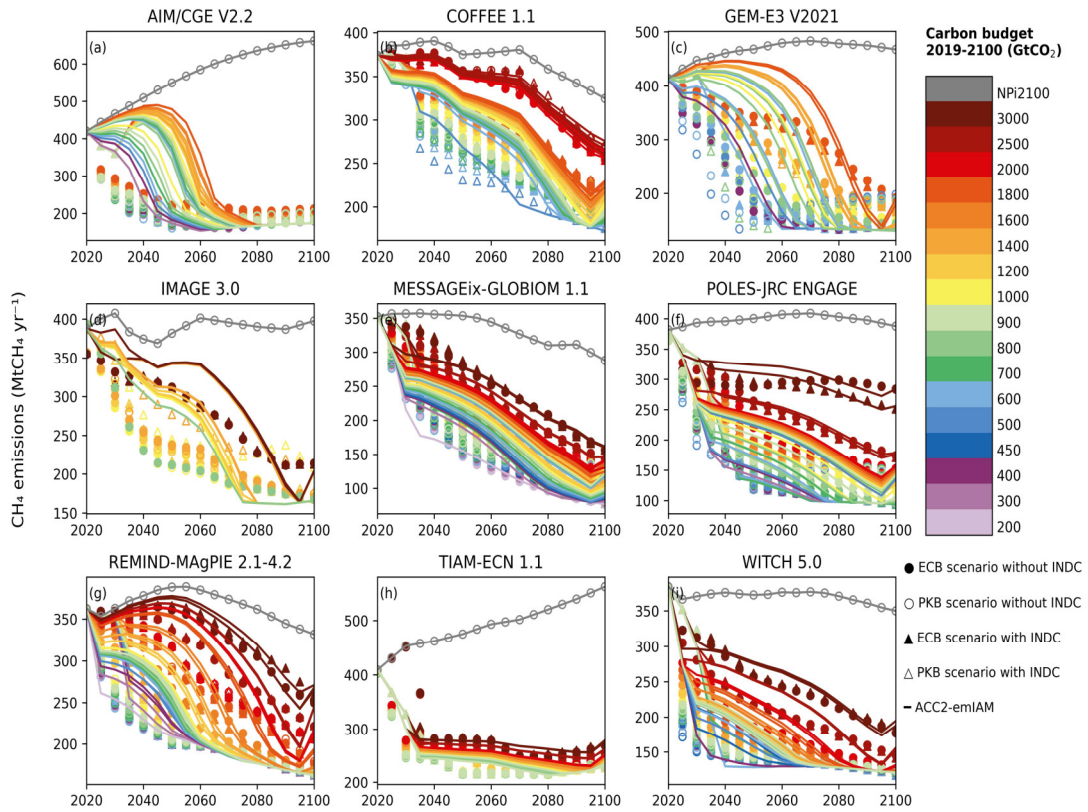

Figure S131. Test 2 – Global nine IAMs total anthropogenic CH<sub>4</sub> validation results

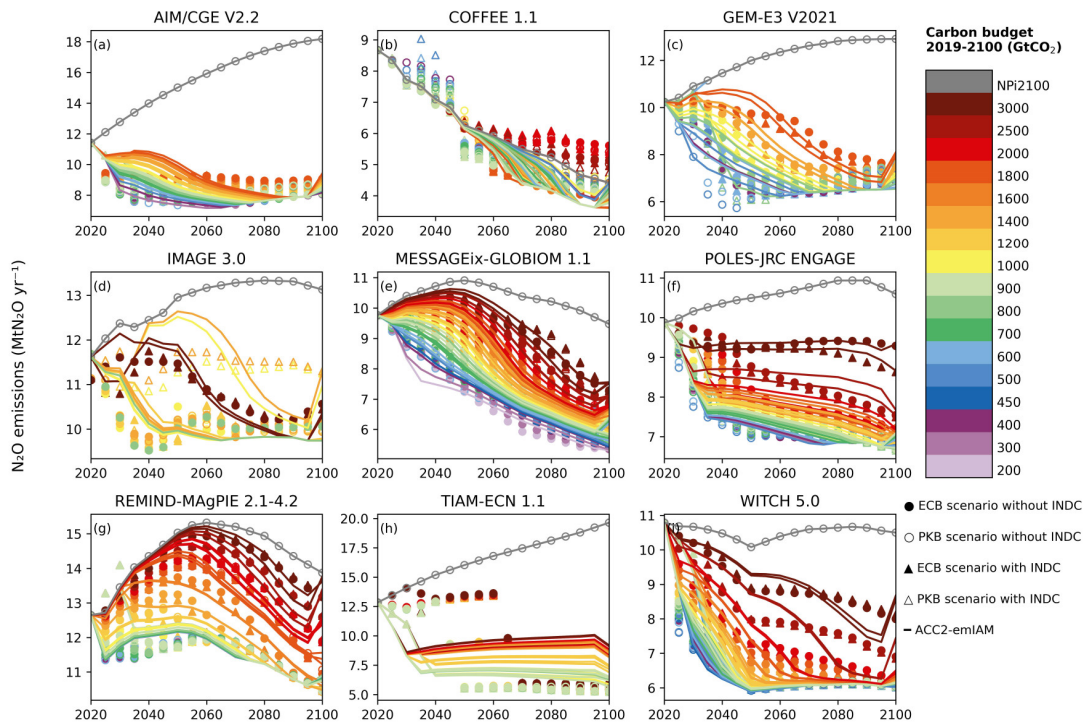

Figure S132. Test 2 – Global nine IAMs total anthropogenic N<sub>2</sub>O validation results

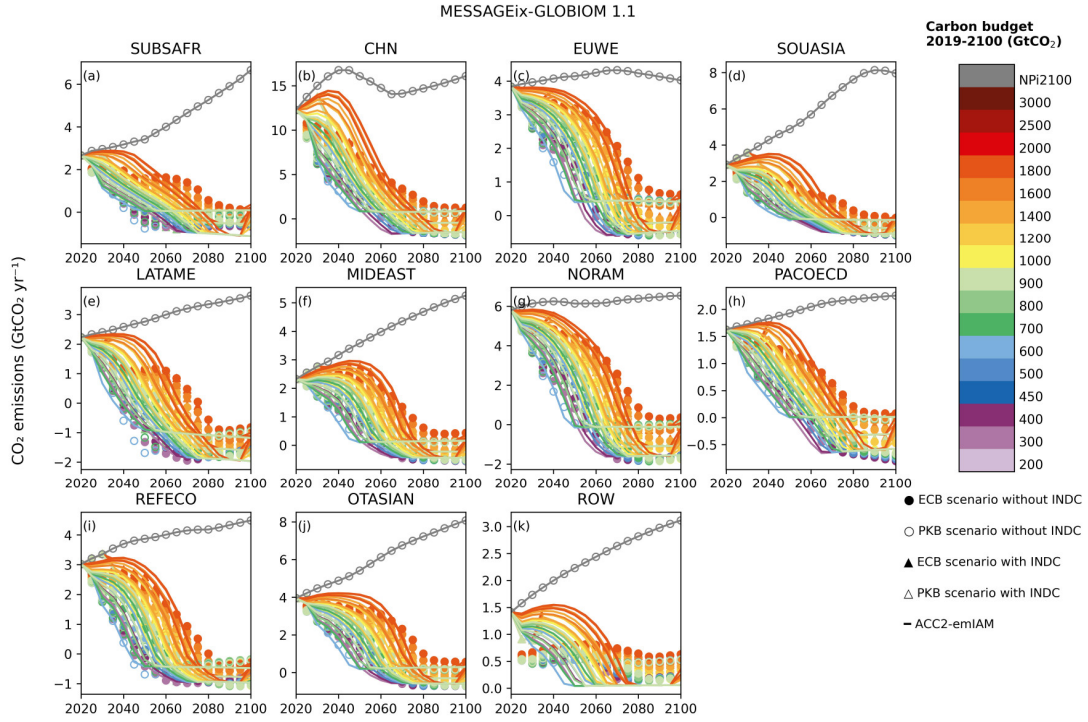

**Figure S133. Test 2 - Regional AIM total anthropogenic CO<sub>2</sub> validation results**

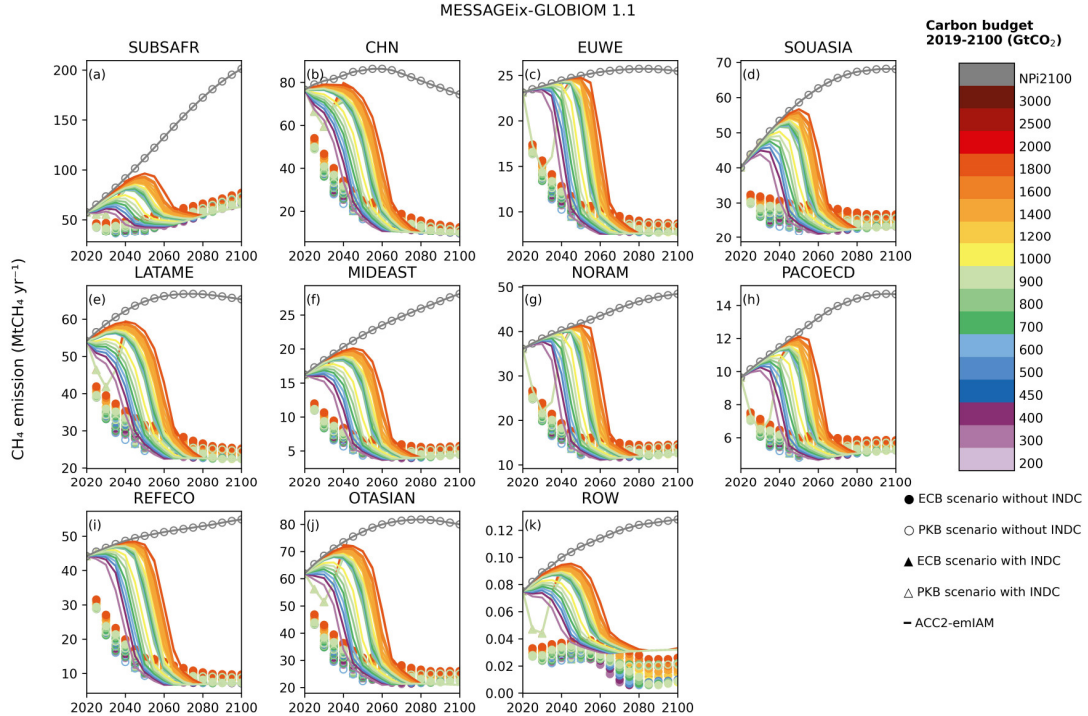

**Figure S134. Test 2 - Regional AIM total anthropogenic CH<sub>4</sub> validation results**



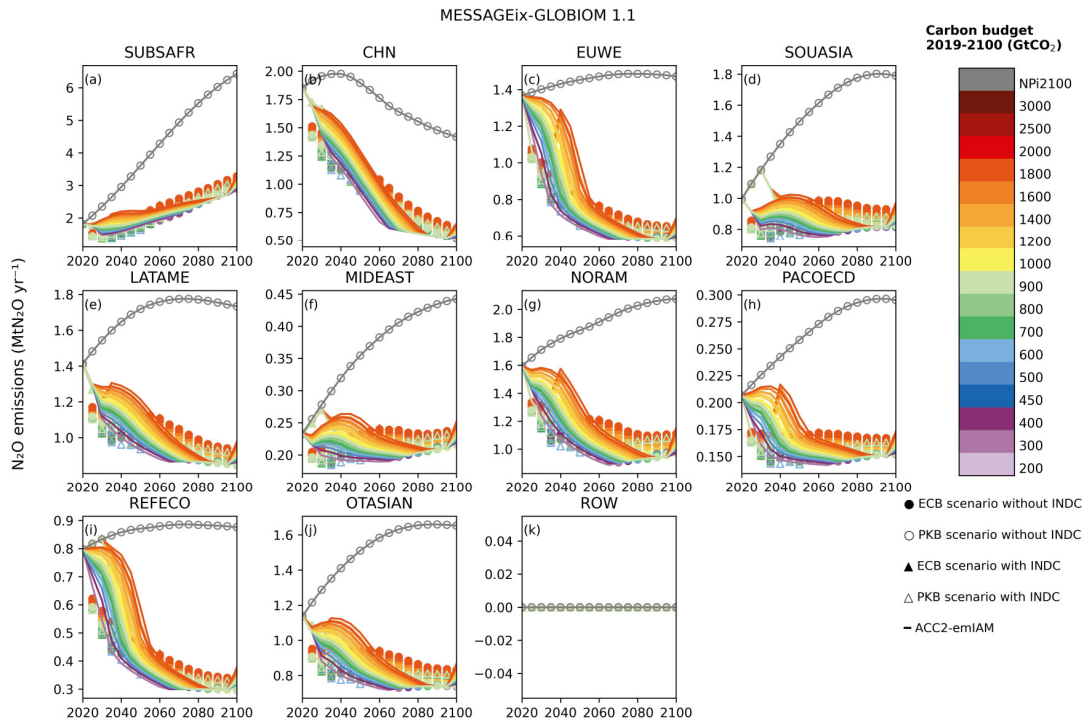

**Figure S135. Test 2 - Regional AIM total anthropogenic N<sub>2</sub>O validation results**

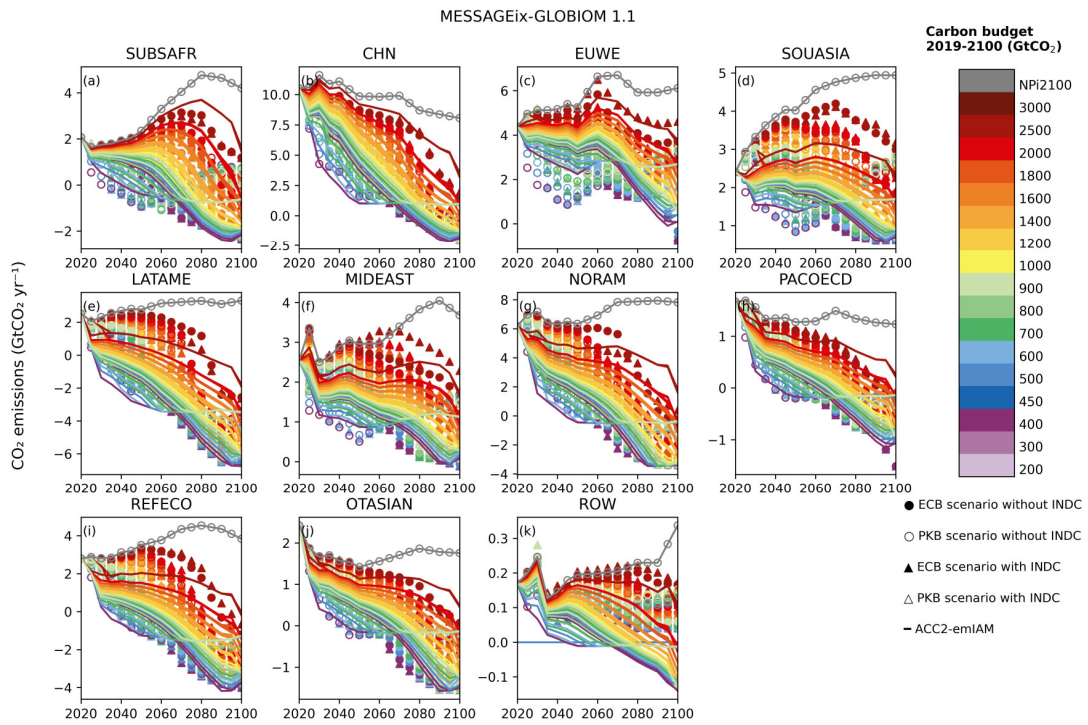

**Figure S136. Test 2 - Regional COFFEE total anthropogenic CO<sub>2</sub> validation results**

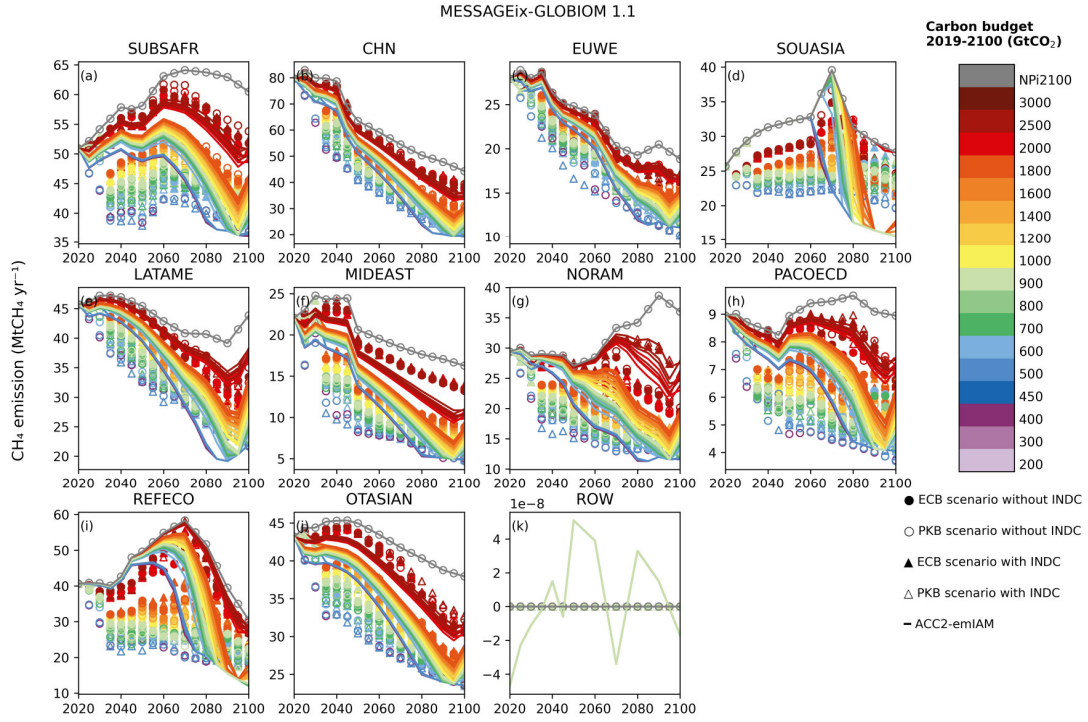

**Figure S137. Test 2 - Regional COFFEE total anthropogenic CH<sub>4</sub> validation results**

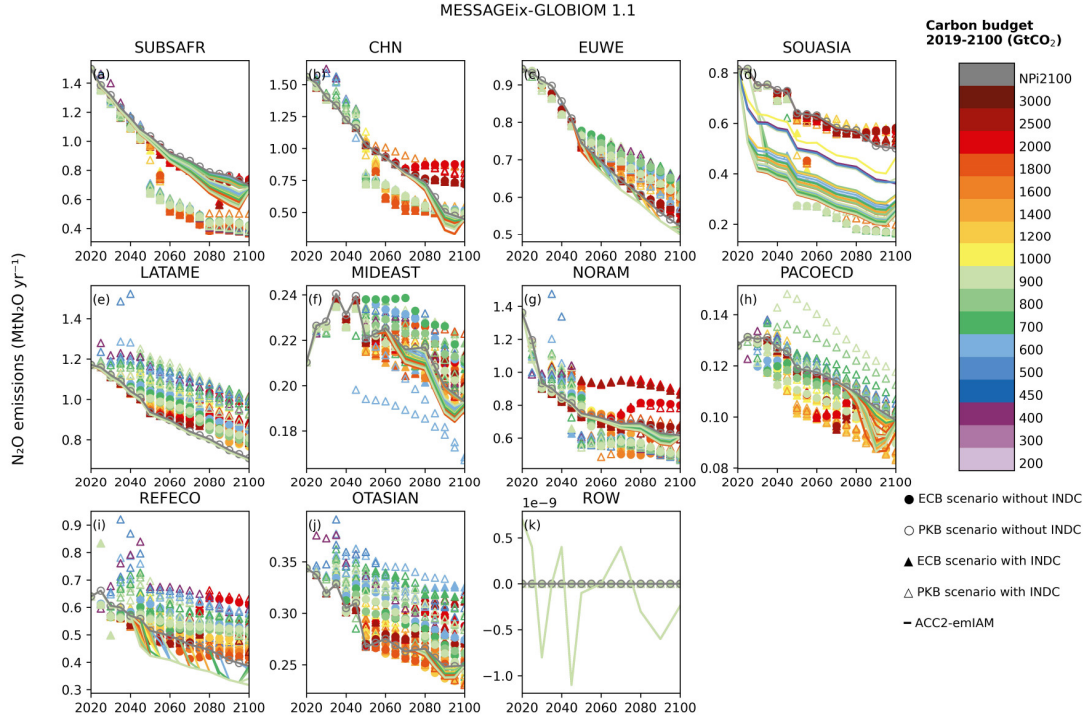

**Figure S138. Test 2 - Regional COFFEE total anthropogenic N<sub>2</sub>O validation results**

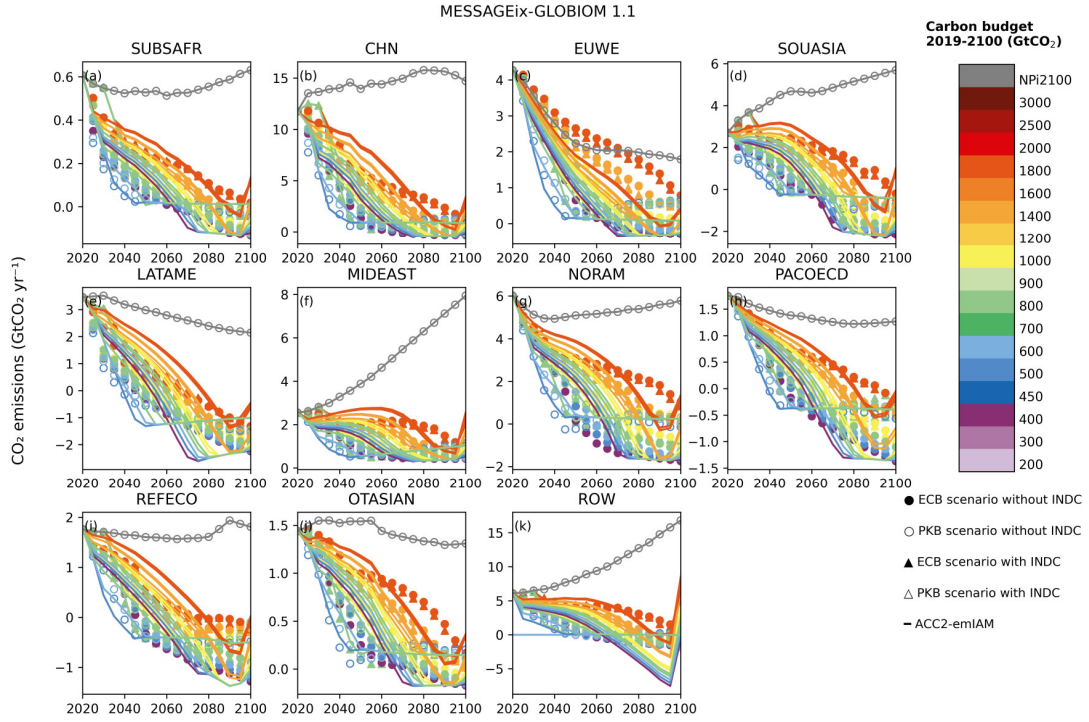

**Figure S139. Test 2 - Regional GEM total anthropogenic CO<sub>2</sub> validation results**

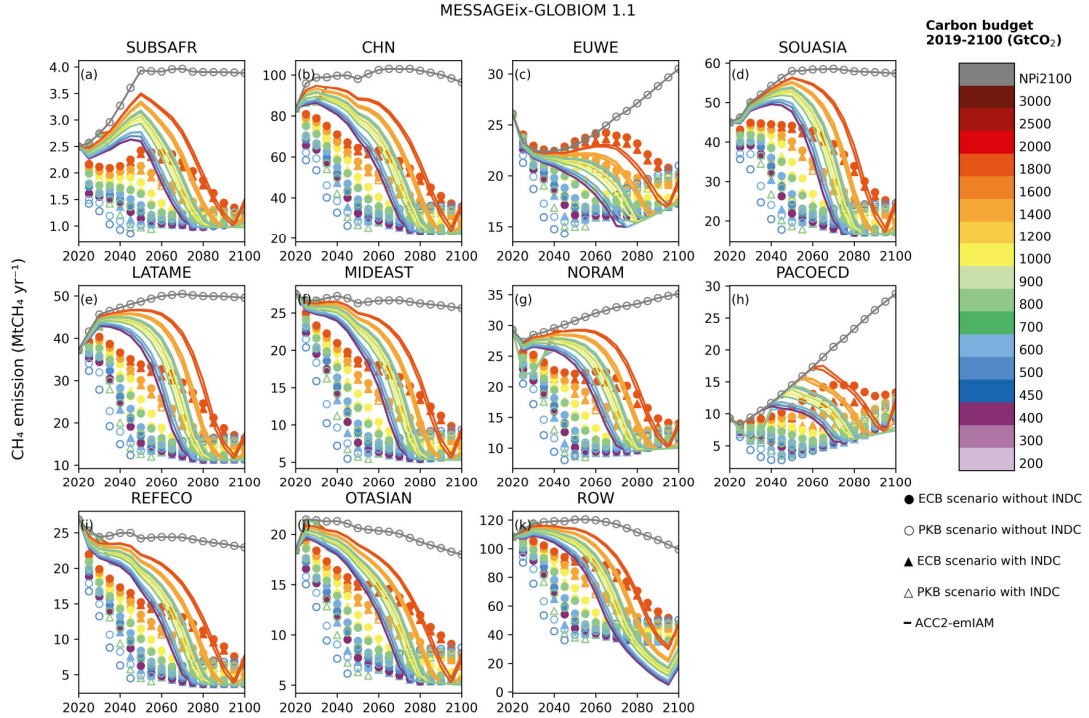

**Figure S140. Test 2 - Regional GEM total anthropogenic CH<sub>4</sub> validation results**



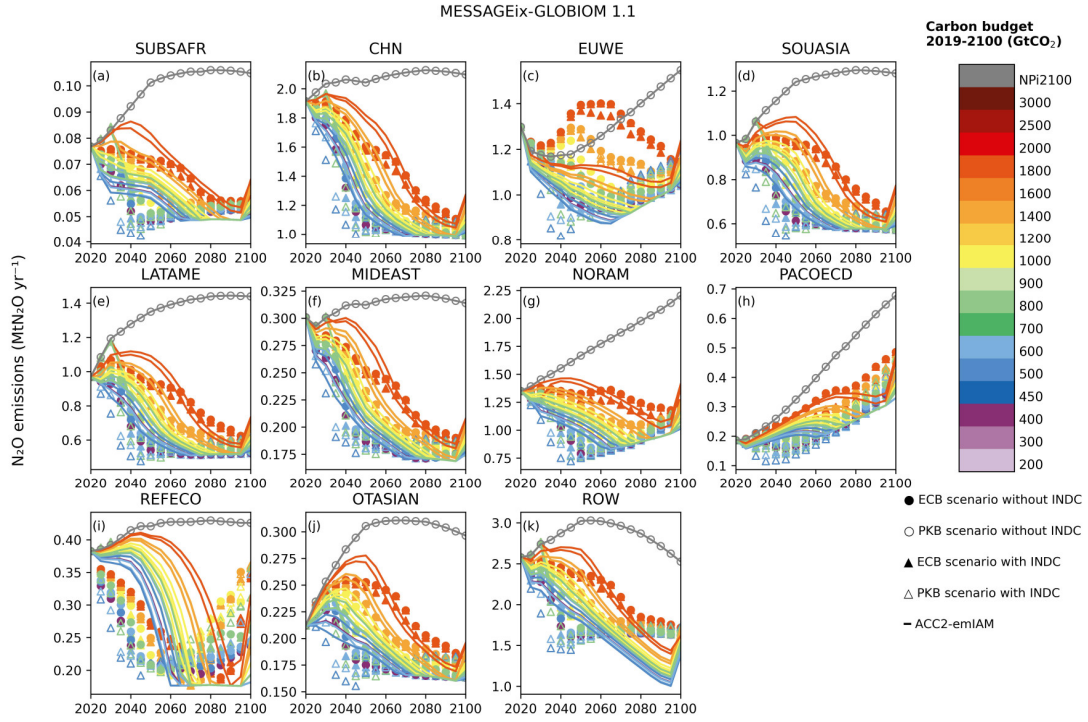

**Figure S141. Test 2 - Regional GEM total anthropogenic N<sub>2</sub>O validation results**

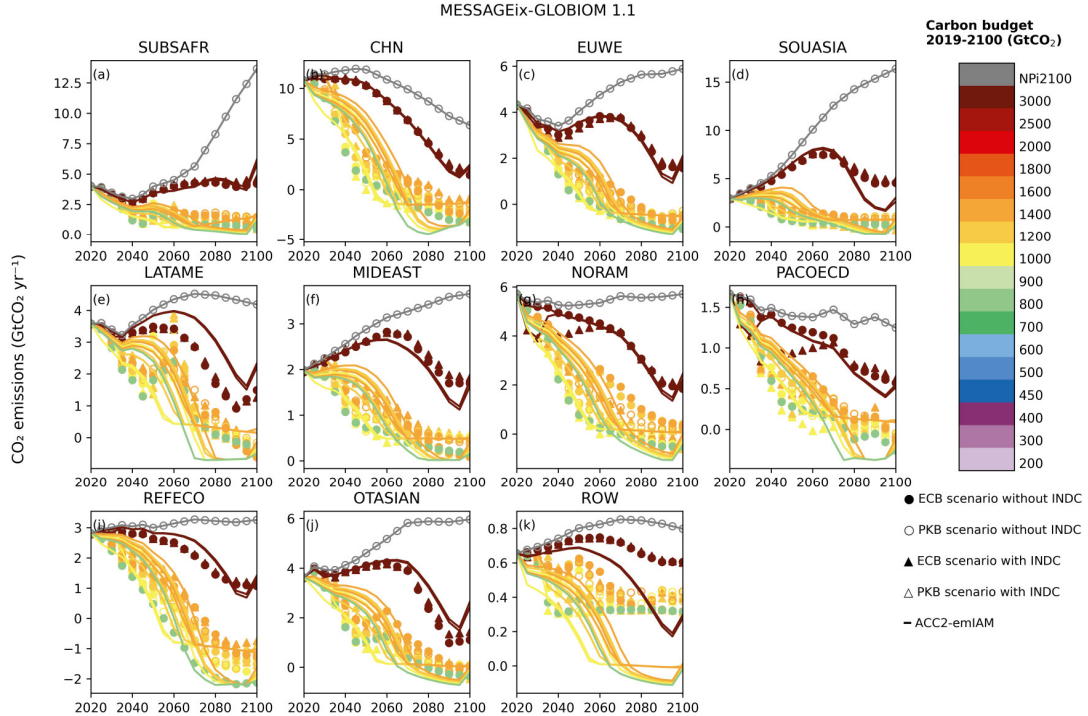

**Figure S142. Test 2 - Regional IMAGE total anthropogenic CO<sub>2</sub> validation results**

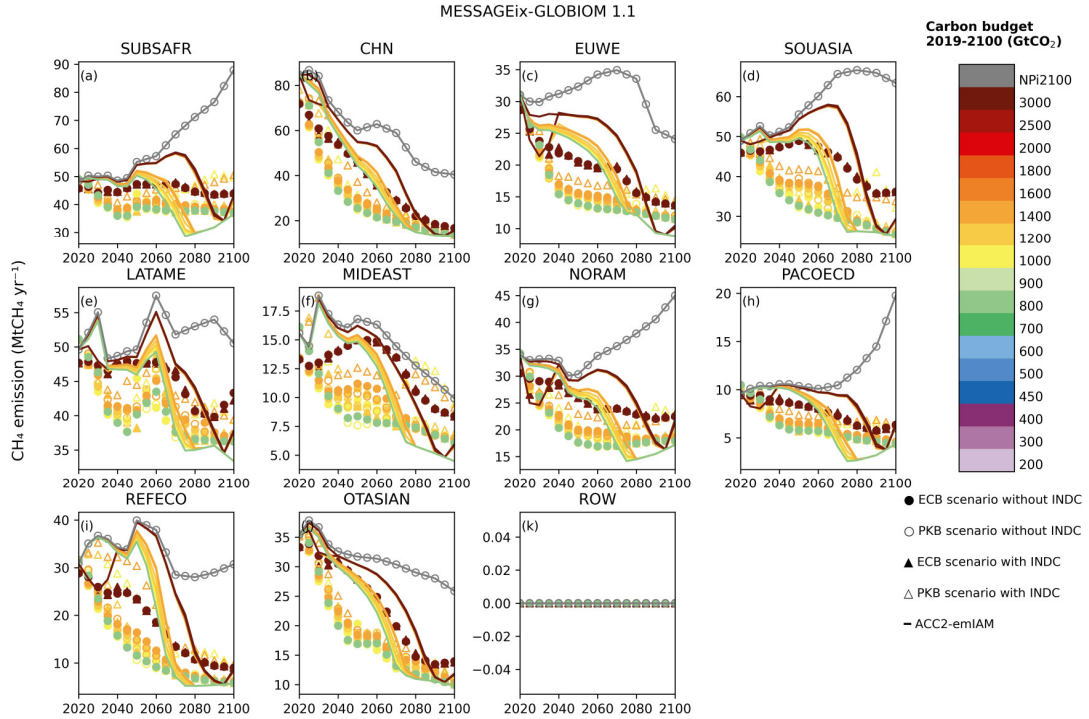

**Figure S143. Test 2 - Regional IMAGE total anthropogenic CH<sub>4</sub> validation results**

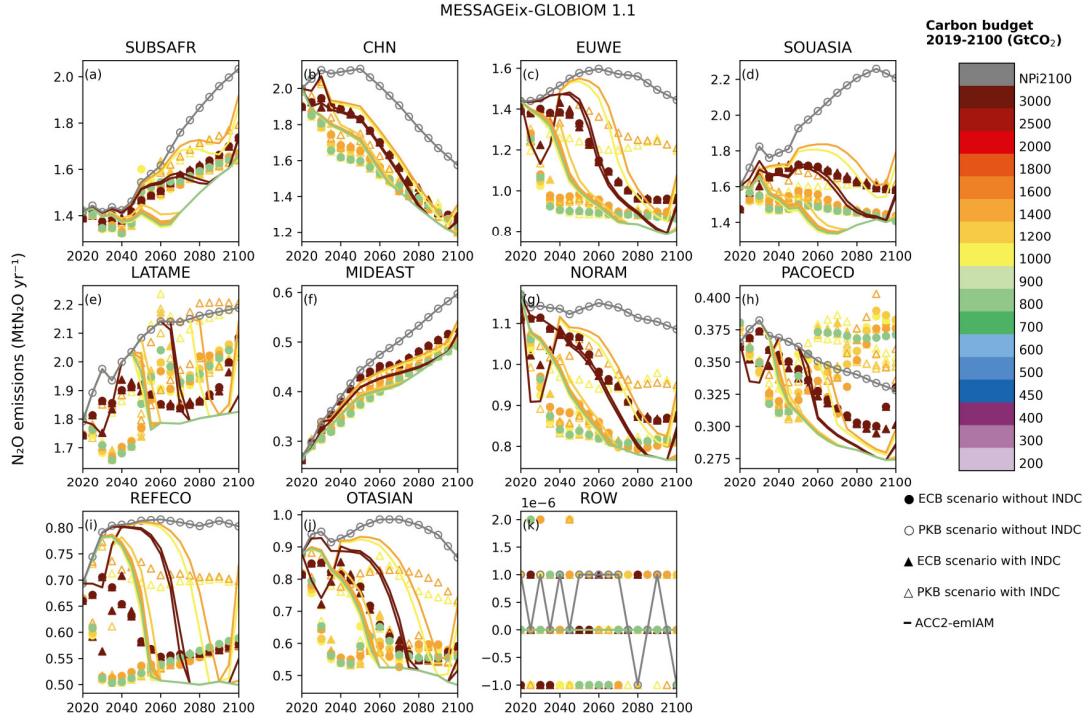

**Figure S144. Test 2 - Regional IMAGE total anthropogenic N<sub>2</sub>O validation results**

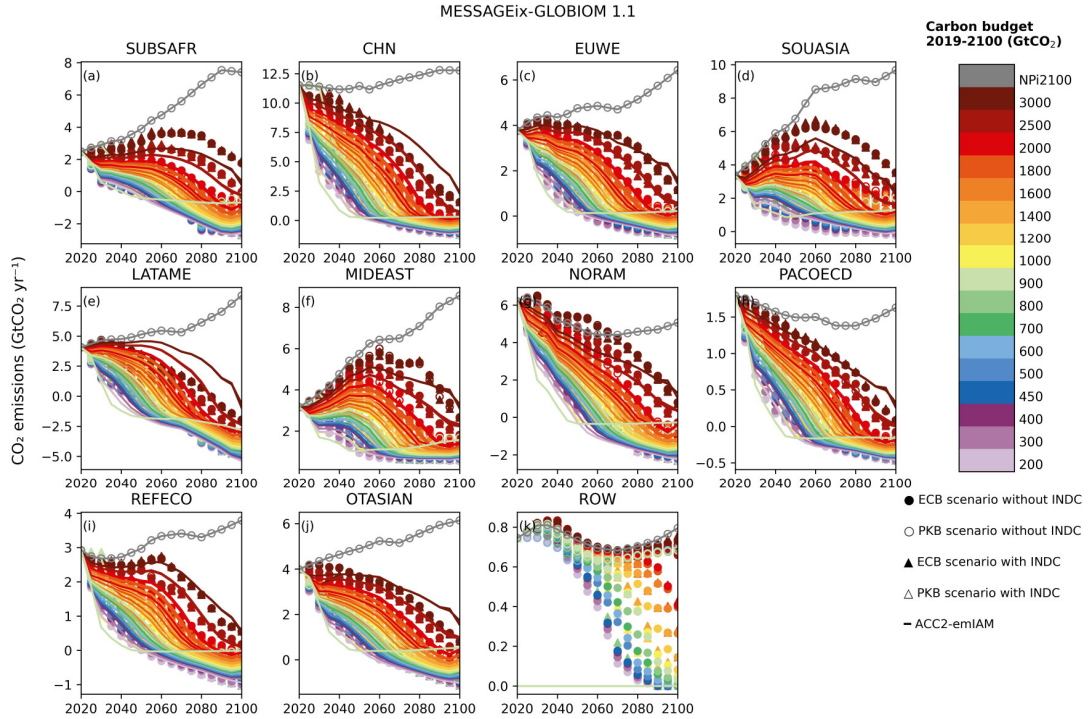

**Figure S145. Test 2 - Regional MESSAGE total anthropogenic CO<sub>2</sub> validation results**

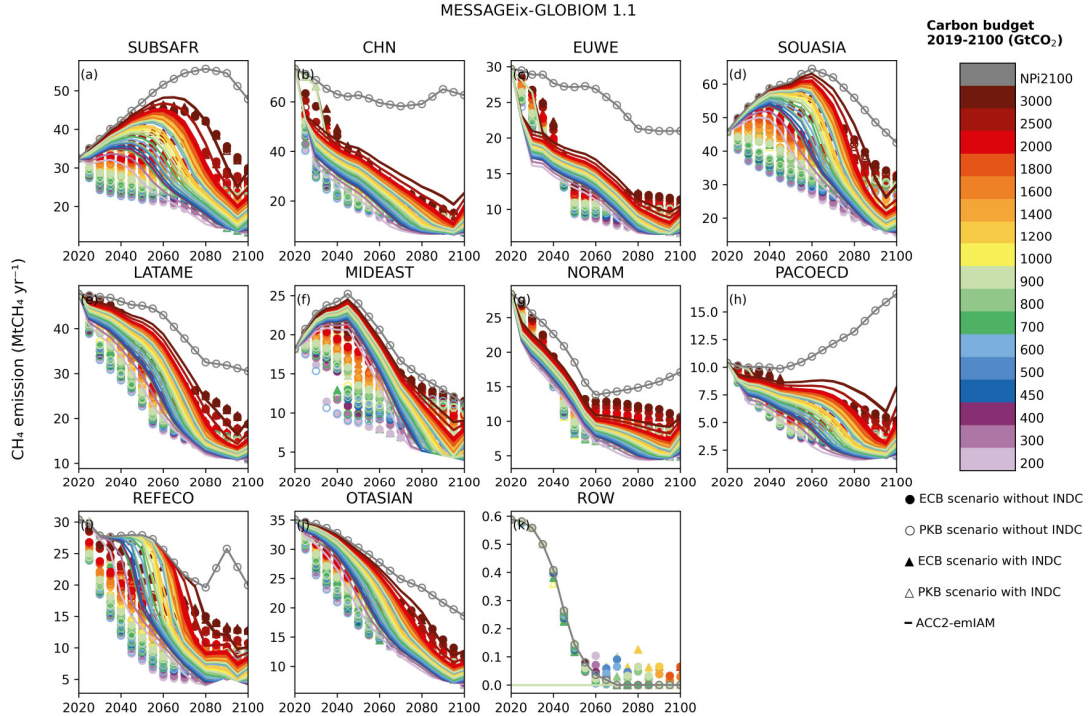

**Figure S146. Test 2 - Regional MESSAGE total anthropogenic CH<sub>4</sub> validation results**



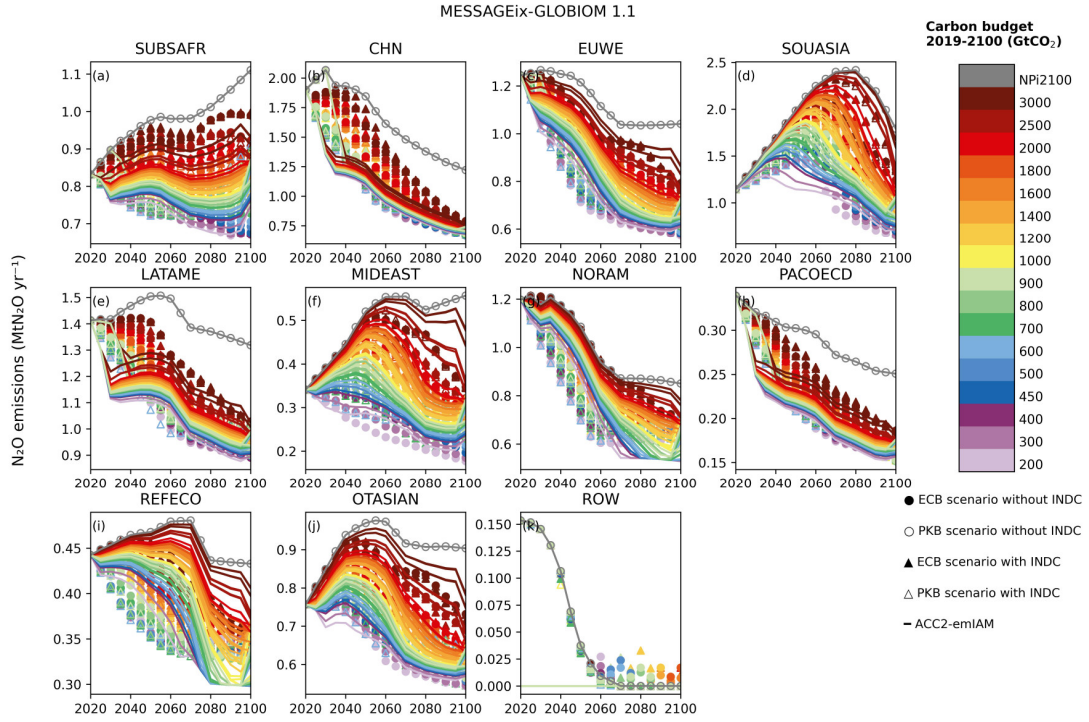

**Figure S147. Test 2 - Regional MESSAGE total anthropogenic N<sub>2</sub>O validation results**

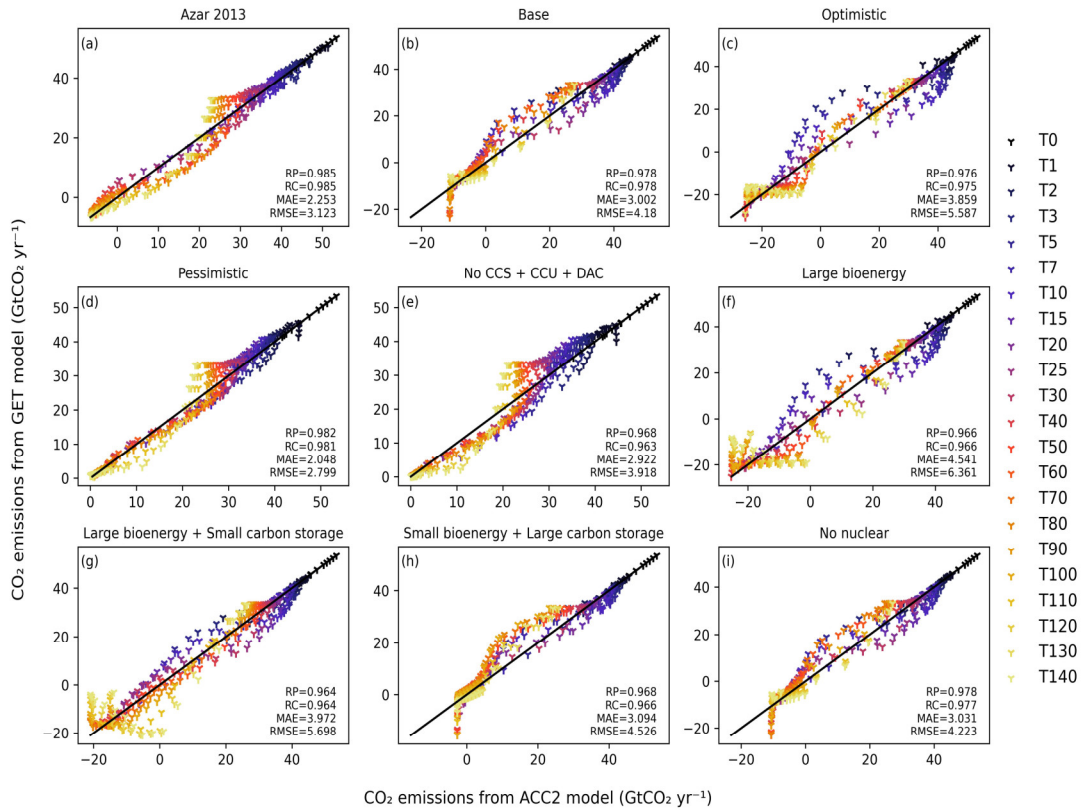

**Figure S148. Test 2 - GET - Reproducibility of energy-related CO<sub>2</sub>**

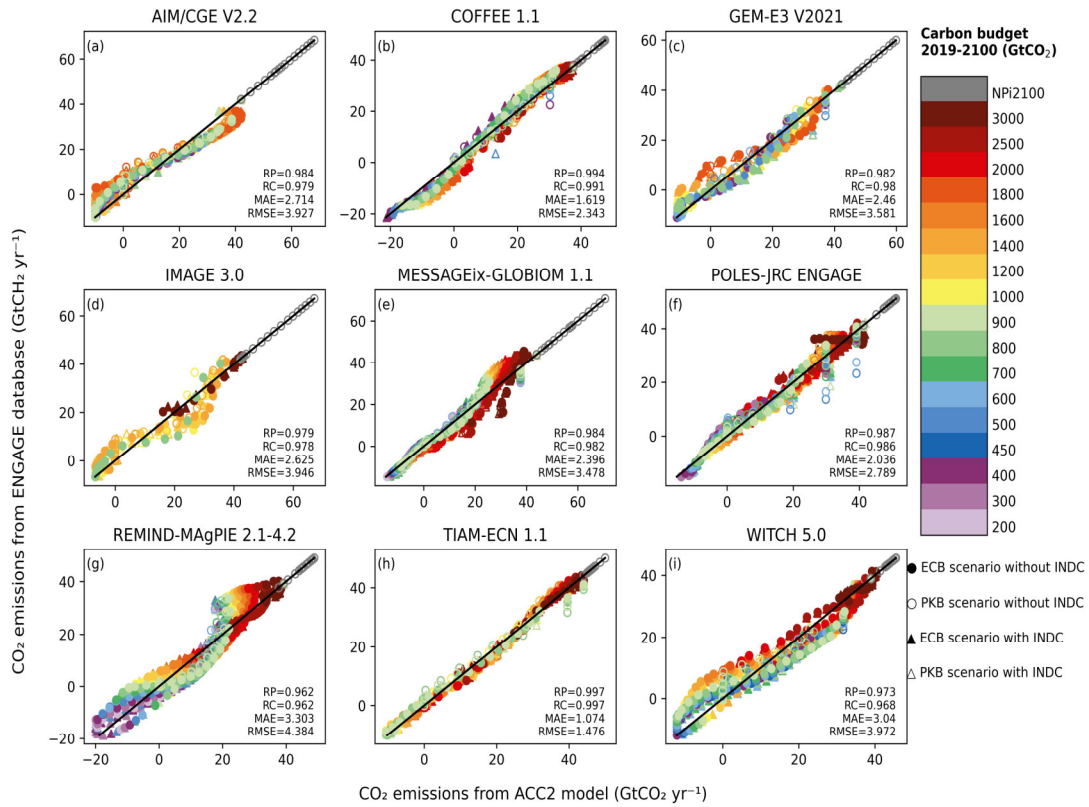

Figure S149. Test 2 - Global nine IAMs - Reproducibility of total anthropogenic CO<sub>2</sub>

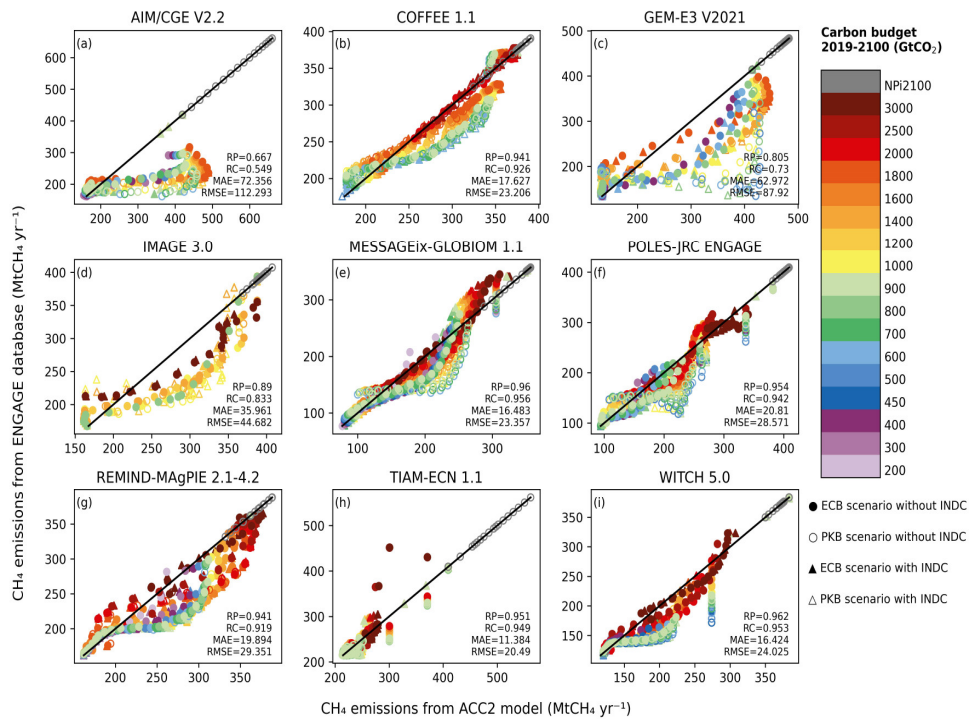

Figure S150. Test 2 - Global nine IAMs - Reproducibility of total anthropogenic CH<sub>4</sub>



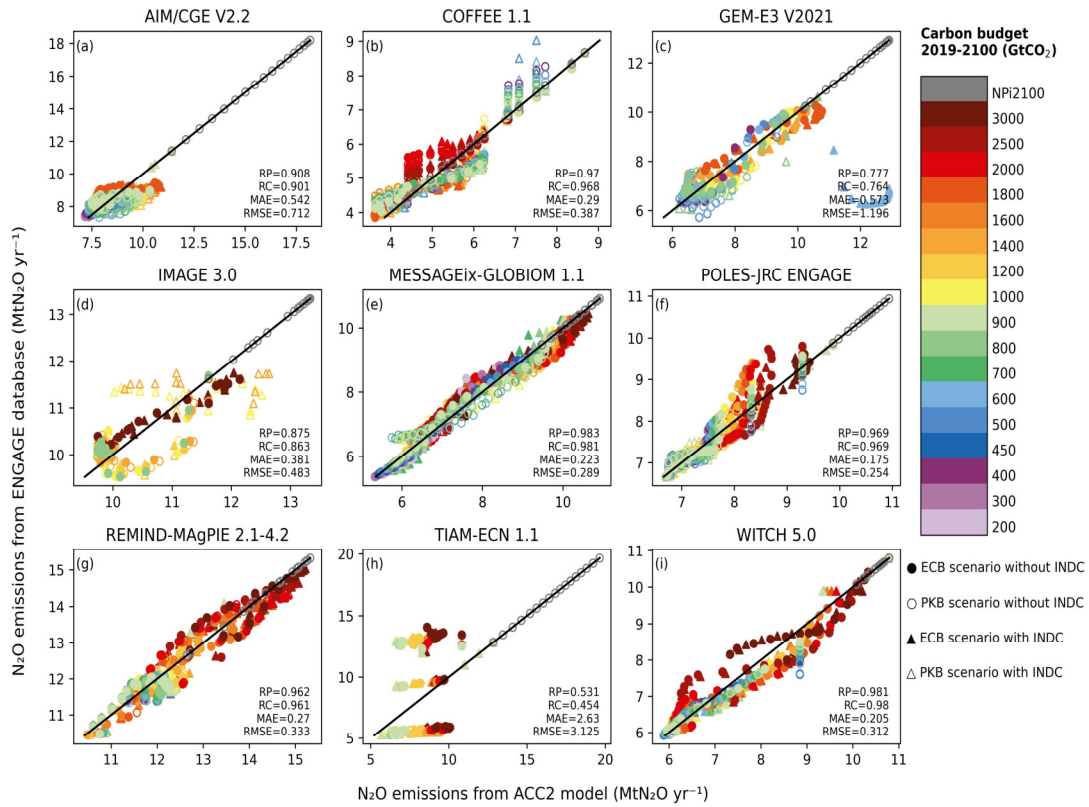

Figure S151. Test 2 - Global nine IAMs - Reproducibility of total anthropogenic  $N_2O$

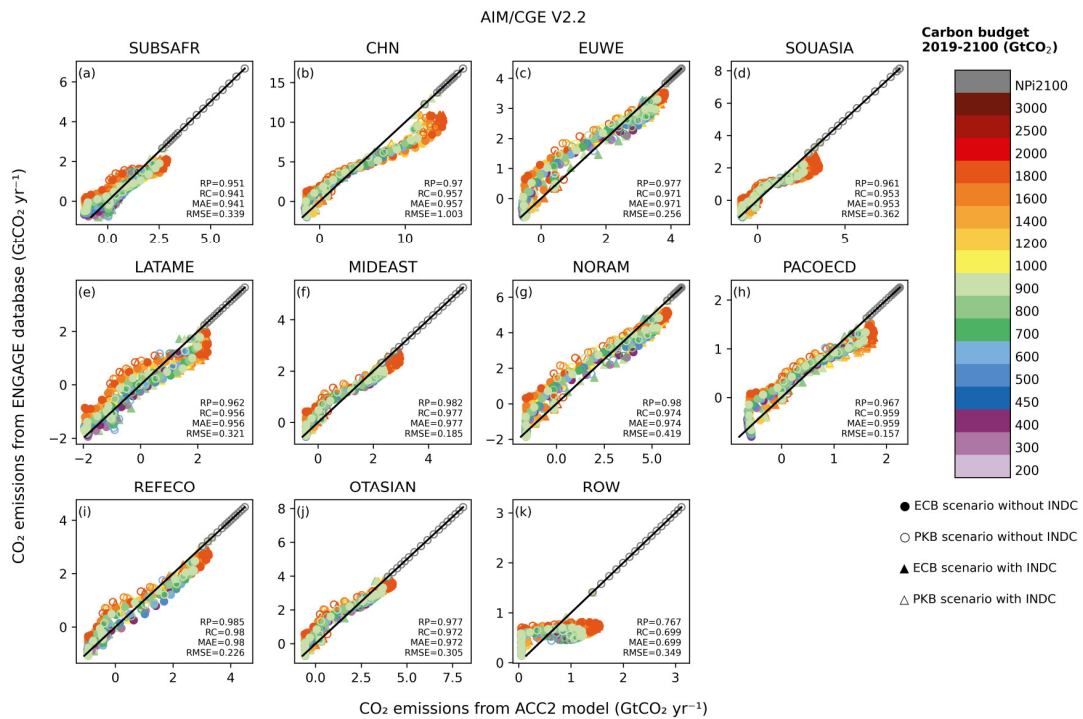

Figure S152. Test 2 - Regional AIM - Reproducibility of total anthropogenic  $CO_2$

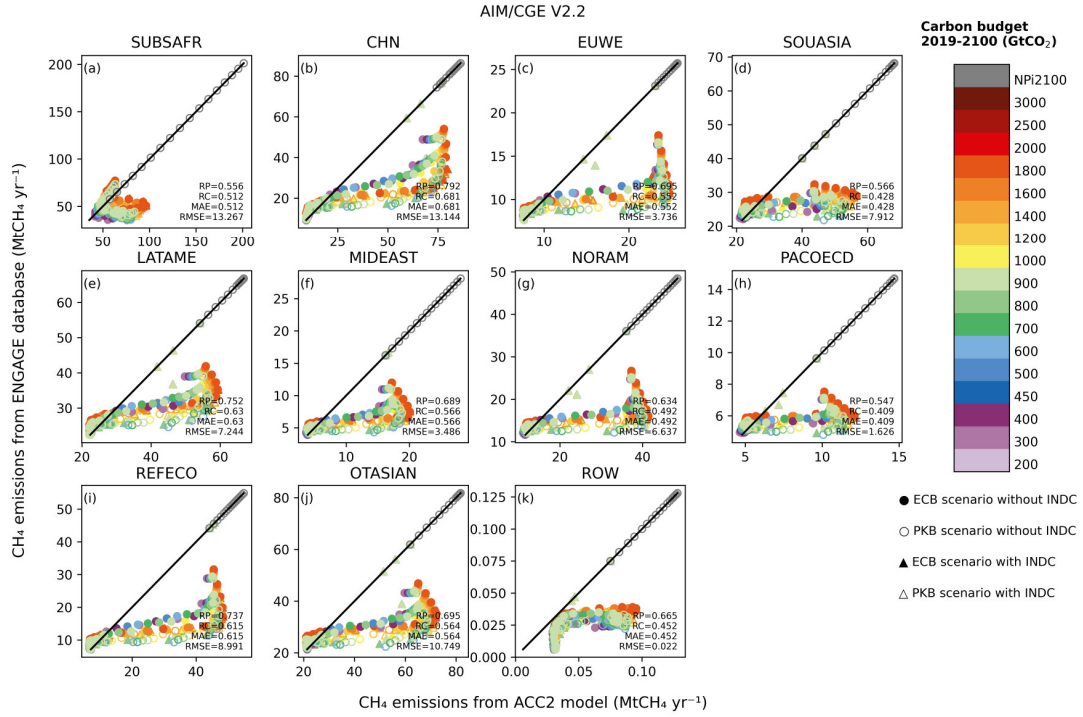

**Figure S153. Test 2 - Regional AIM - Reproducibility of total anthropogenic CH<sub>4</sub>**

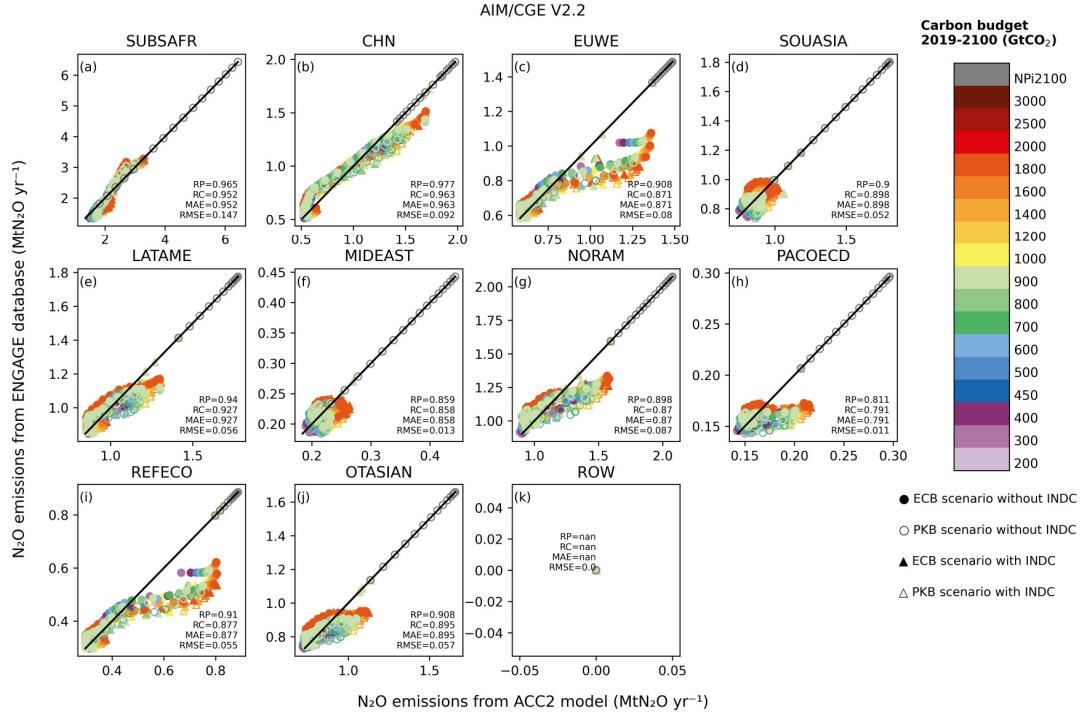

**Figure S154. Test 2 - Regional AIM - Reproducibility of total anthropogenic N<sub>2</sub>O**

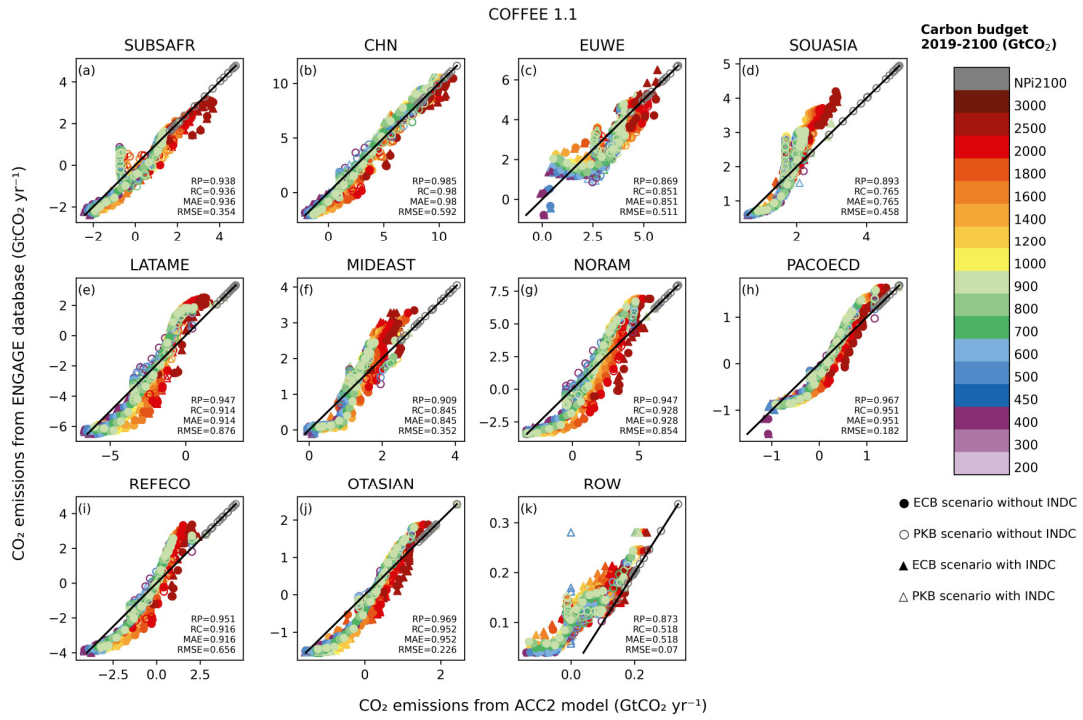

Figure S155. Test 2 - Regional COFFEE - Reproducibility of total anthropogenic CO<sub>2</sub>

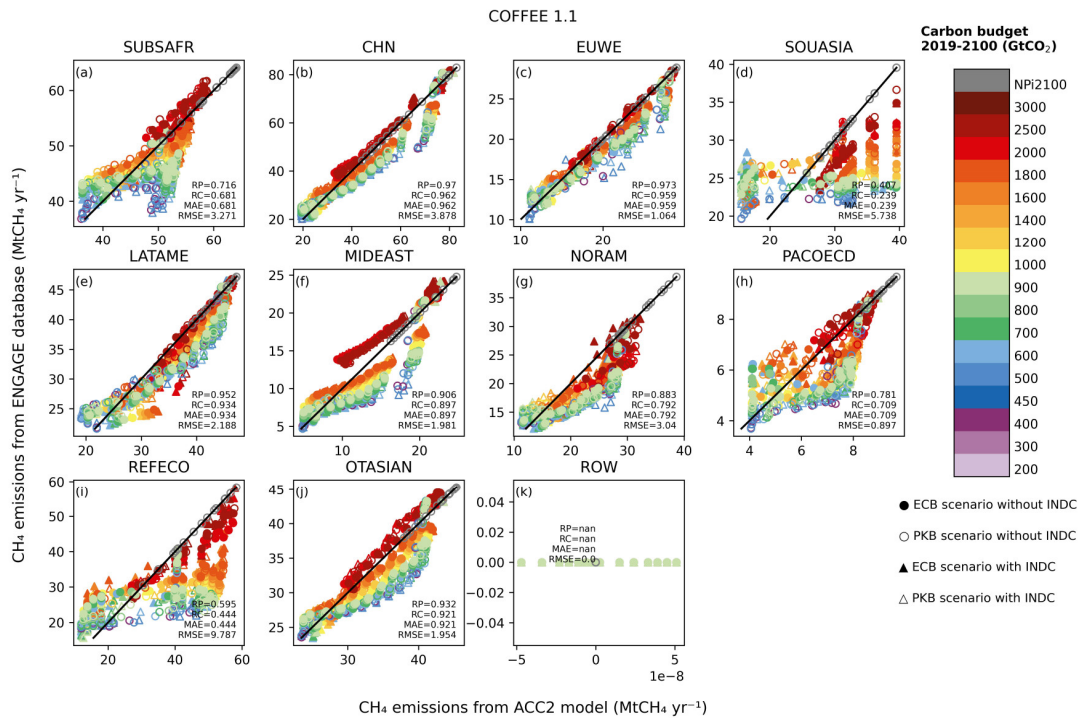

Figure S156. Test 2 - Regional COFFEE - Reproducibility of total anthropogenic CH<sub>4</sub>

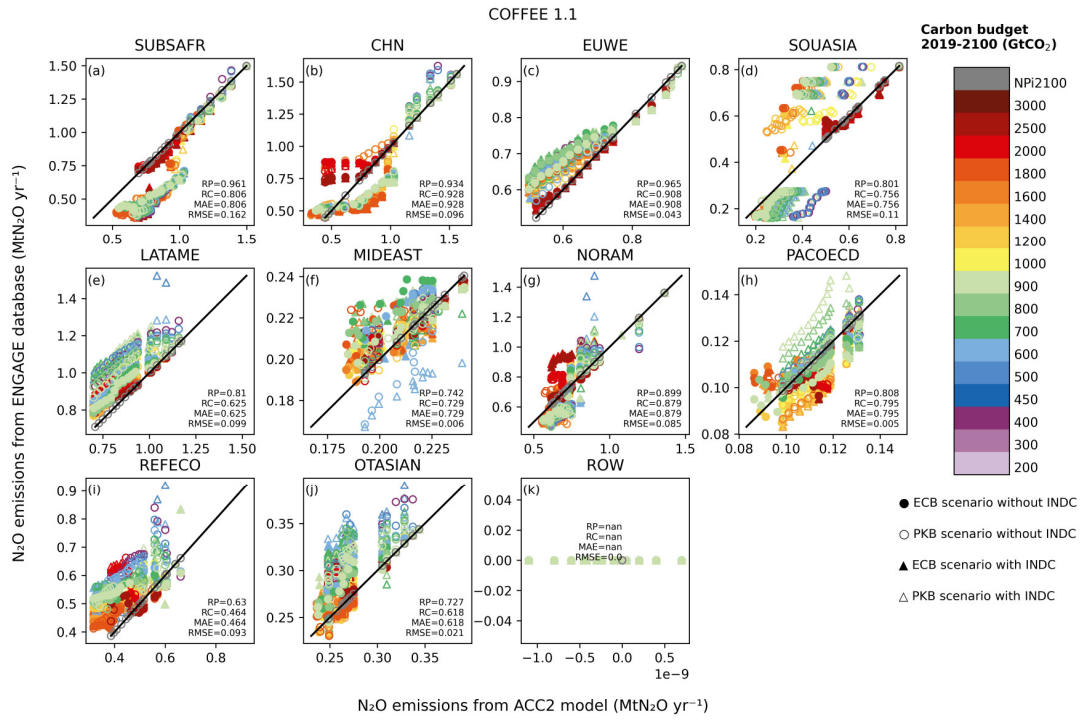

**Figure S157. Test 2 - Regional COFFEE - Reproducibility of total anthropogenic N<sub>2</sub>O**

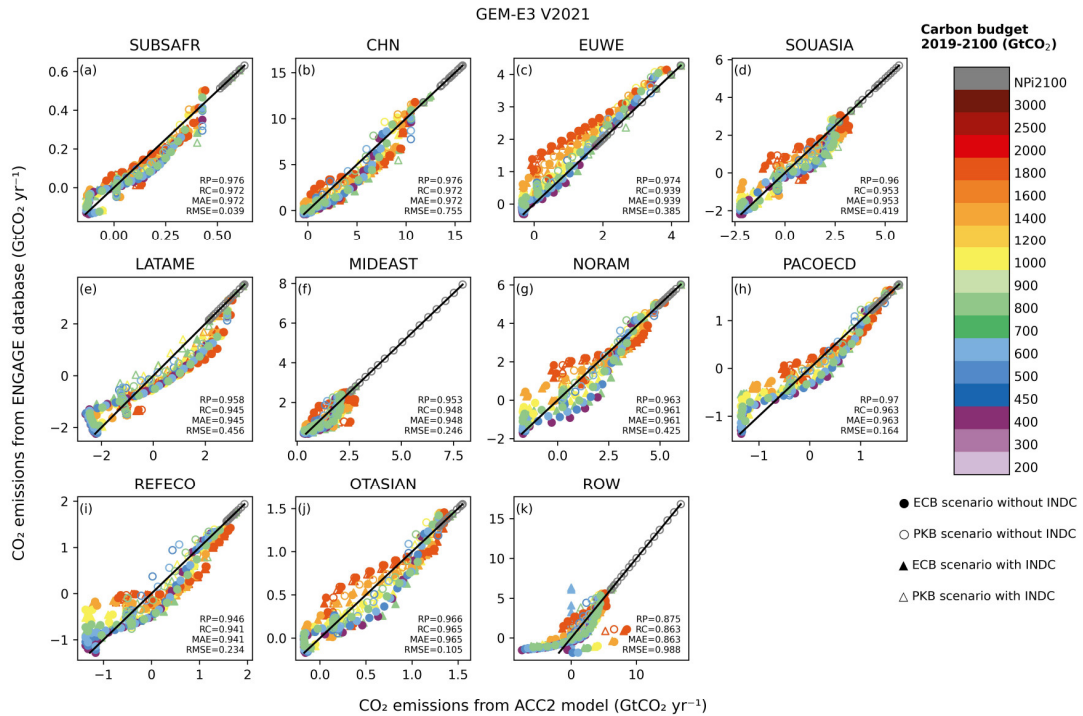

**Figure S158. Test 2 - Regional GEM - Reproducibility of total anthropogenic CO<sub>2</sub>**



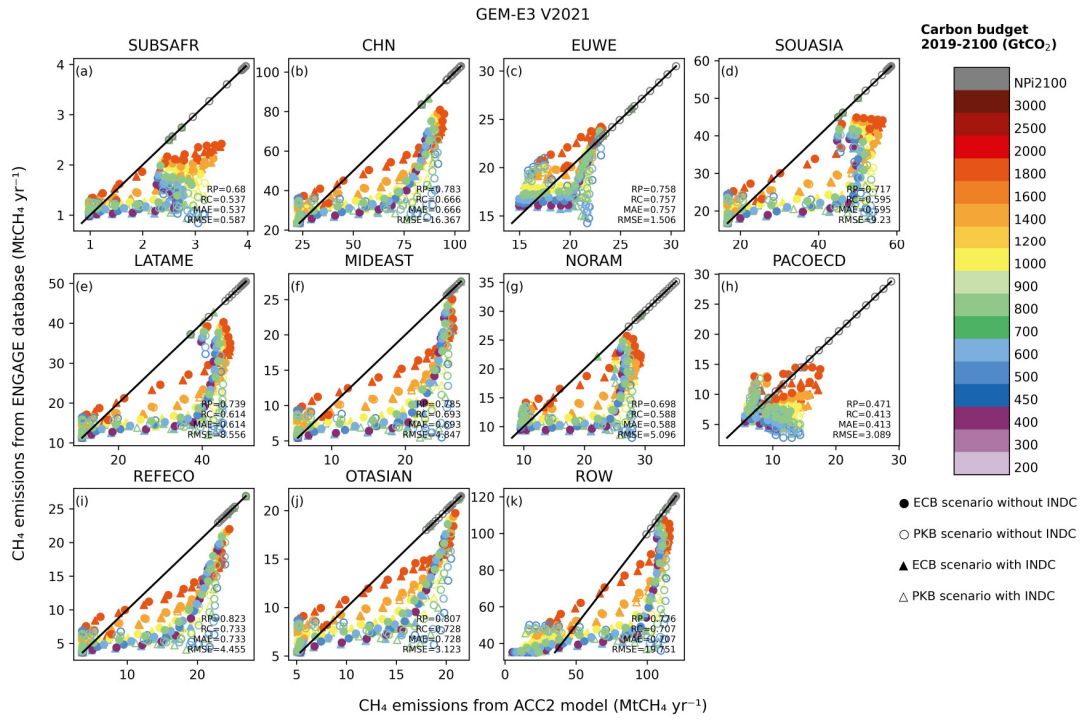

**Figure S159. Test 2 - Regional GEM - Reproducibility of total anthropogenic CH<sub>4</sub>**

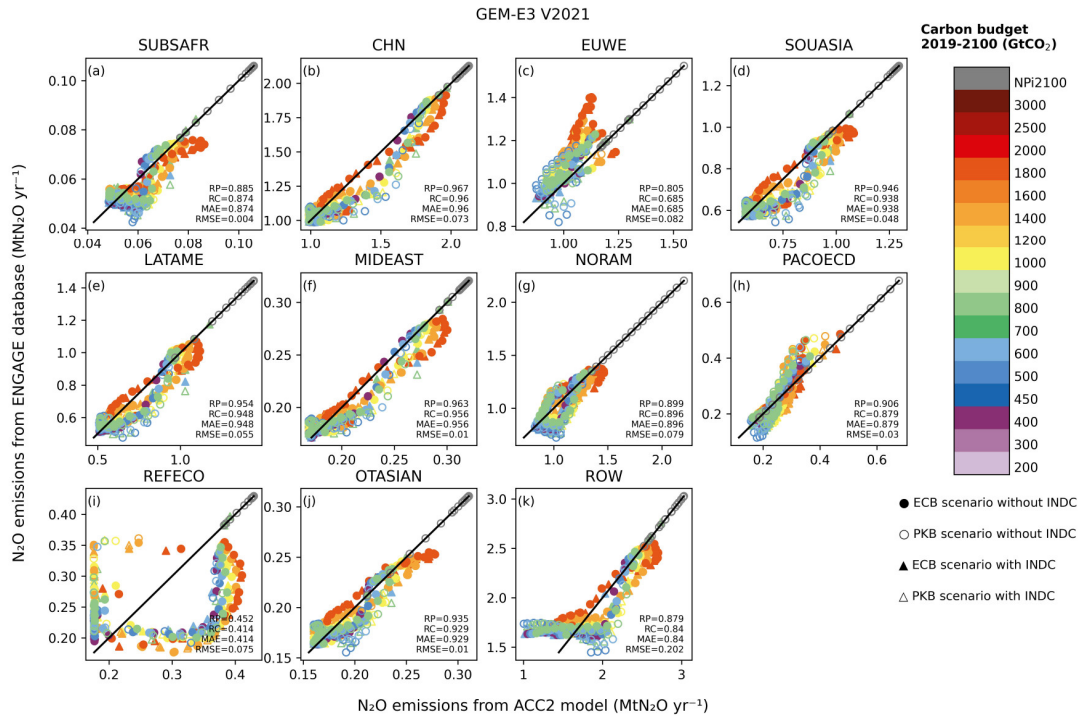

**Figure S160. Test 2 - Regional GEM - Reproducibility of total anthropogenic N<sub>2</sub>O**



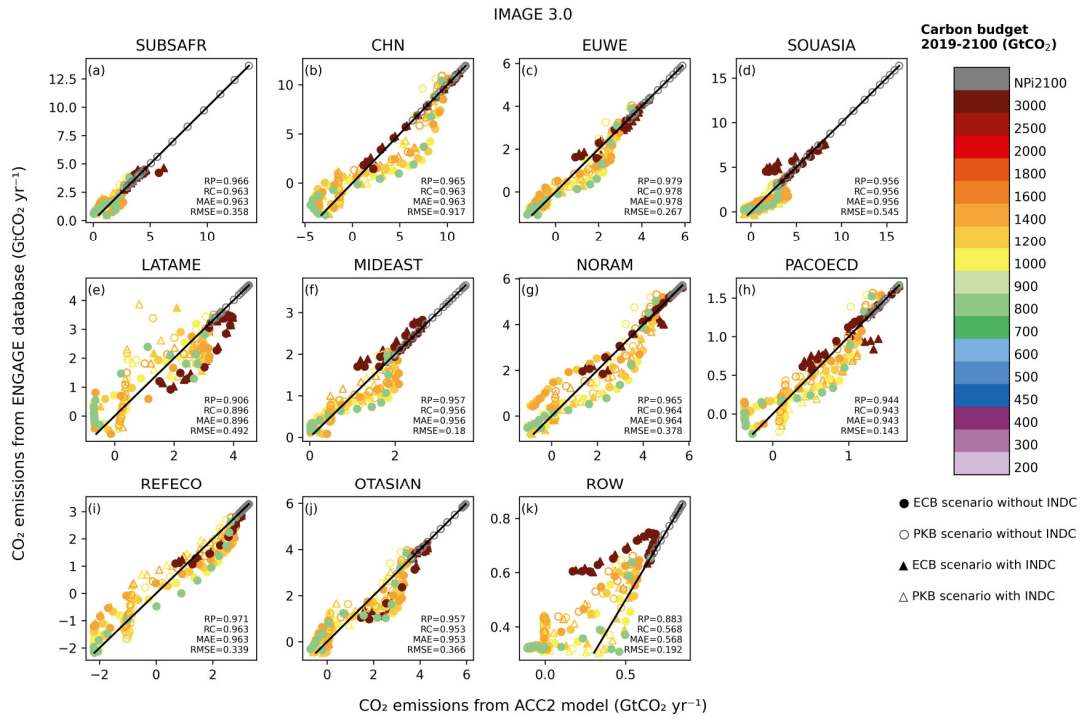

Figure S161. Test 2 - Regional IMAGE - Reproducibility of total anthropogenic CO<sub>2</sub>

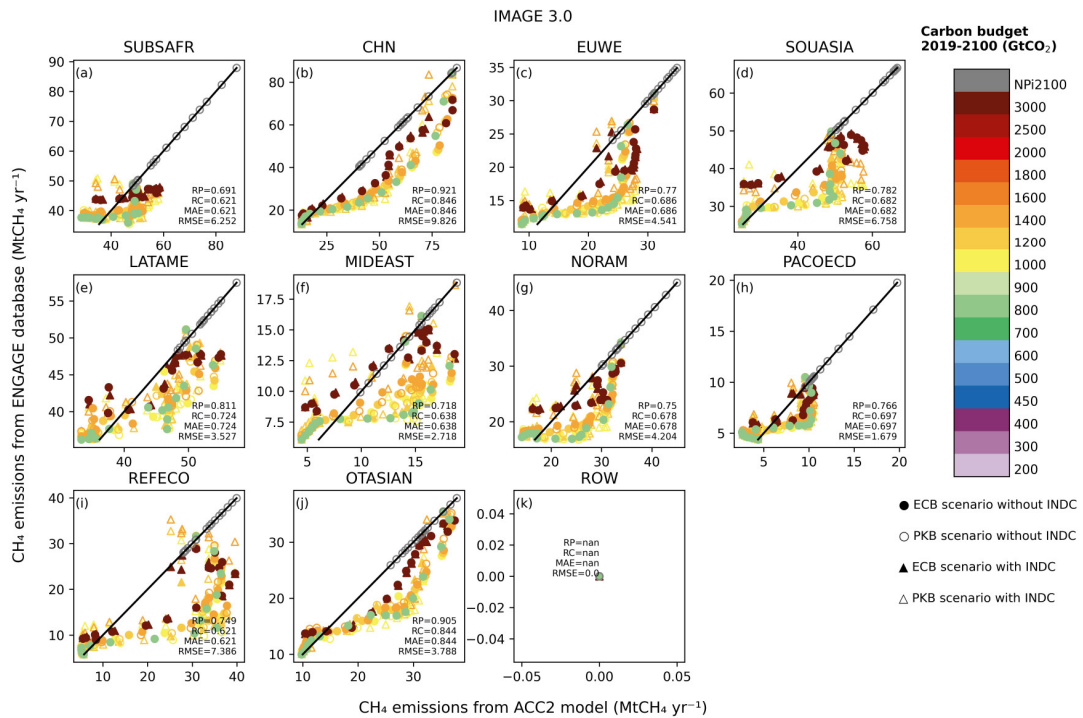

Figure S162. Test 2 - Regional IMAGE - Reproducibility of total anthropogenic CH<sub>4</sub>

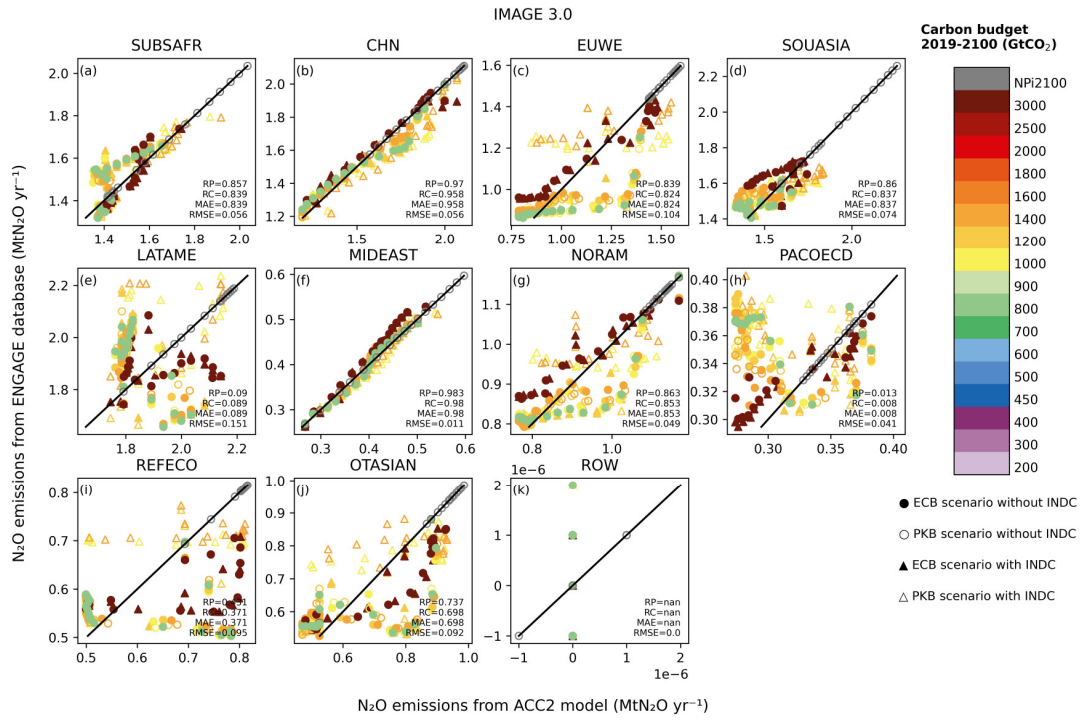

**Figure S163. Test 2 - Regional IMAGE - Reproducibility of total anthropogenic N<sub>2</sub>O**

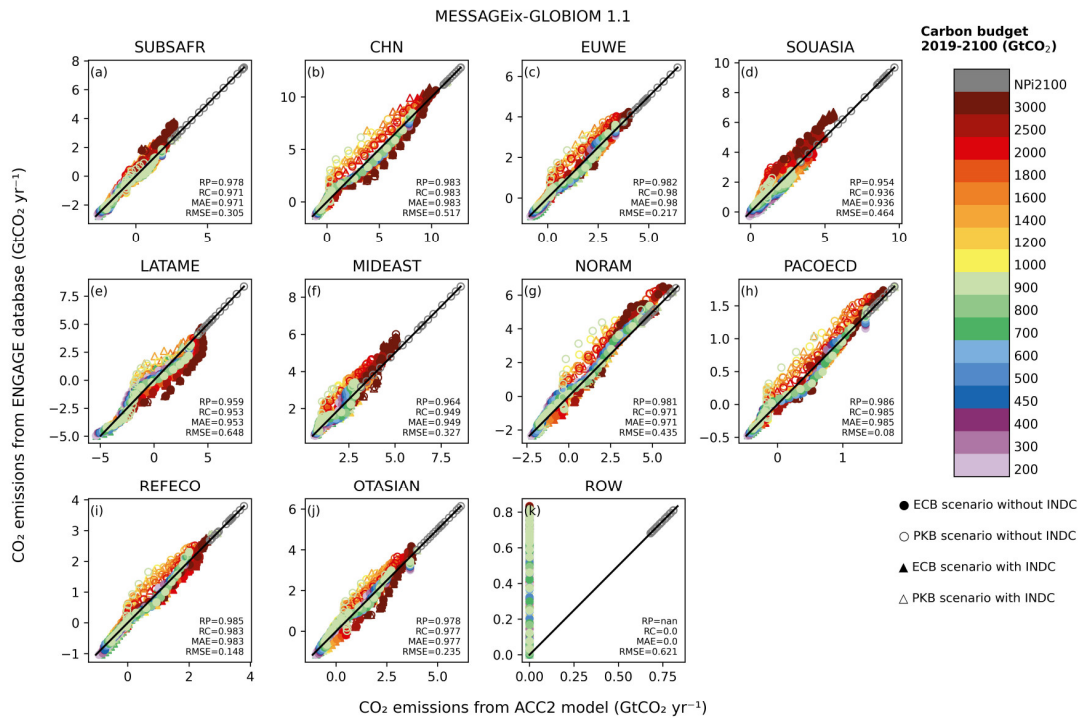

**Figure S164. Test 2 - Regional MESSAGE - Reproducibility of total anthropogenic CO<sub>2</sub>**

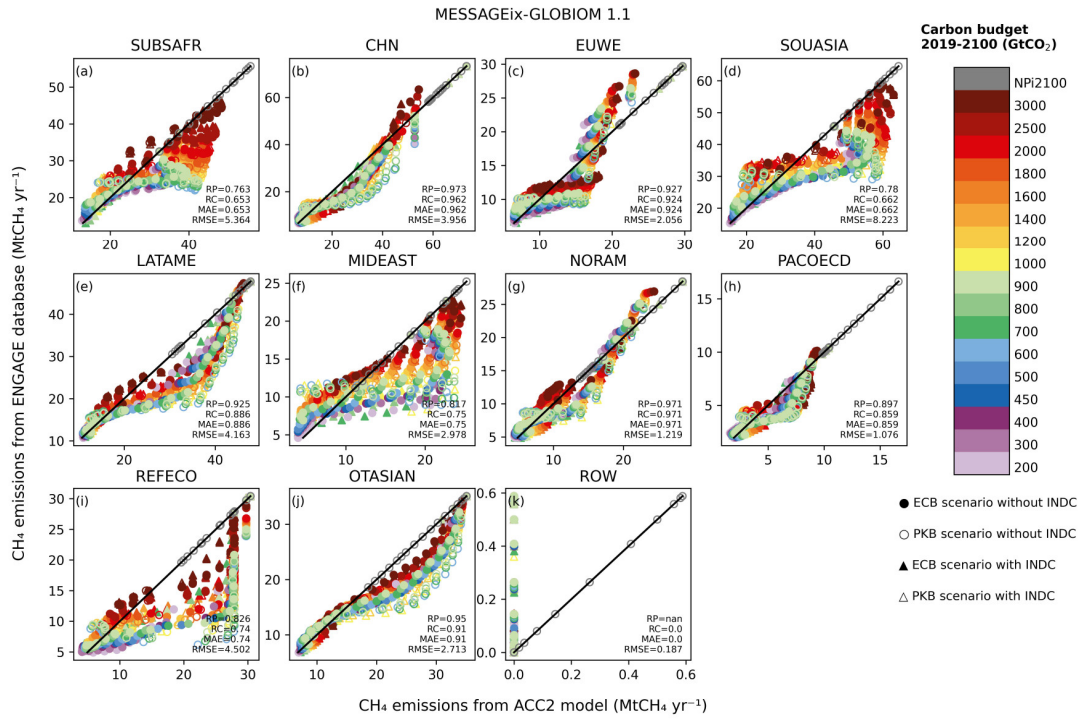

**Figure S165. Test 2 - Regional MESSAGE - Reproducibility of total anthropogenic CH<sub>4</sub>**

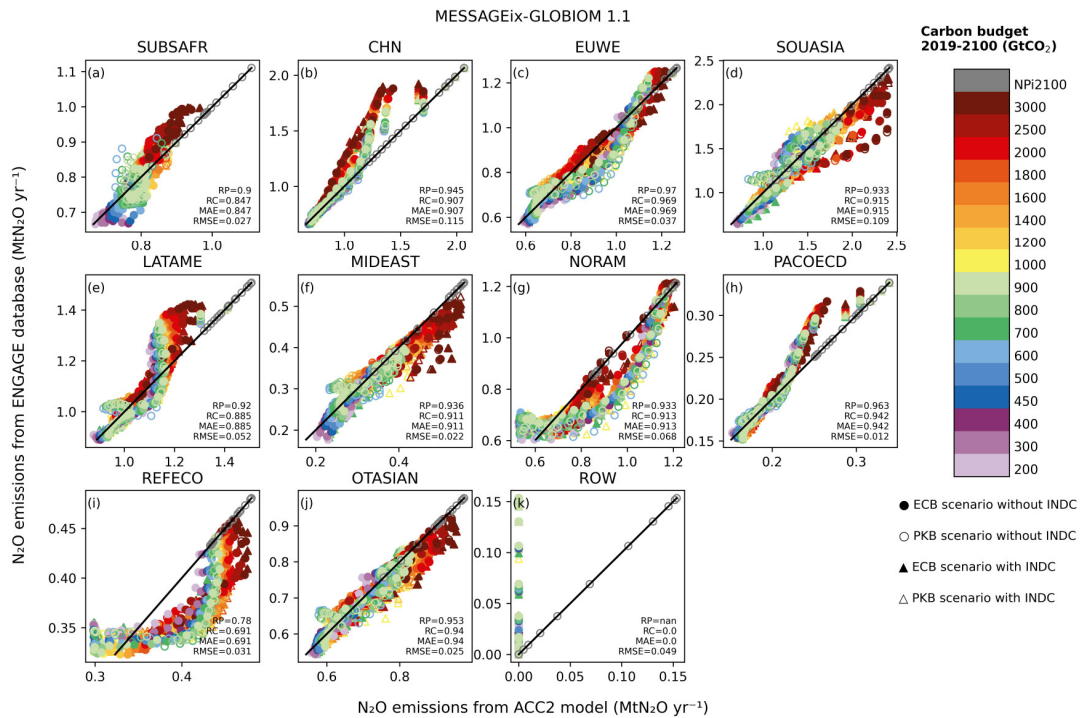

**Figure S166. Test 2 - Regional MESSAGE - Reproducibility of total anthropogenic N<sub>2</sub>O**

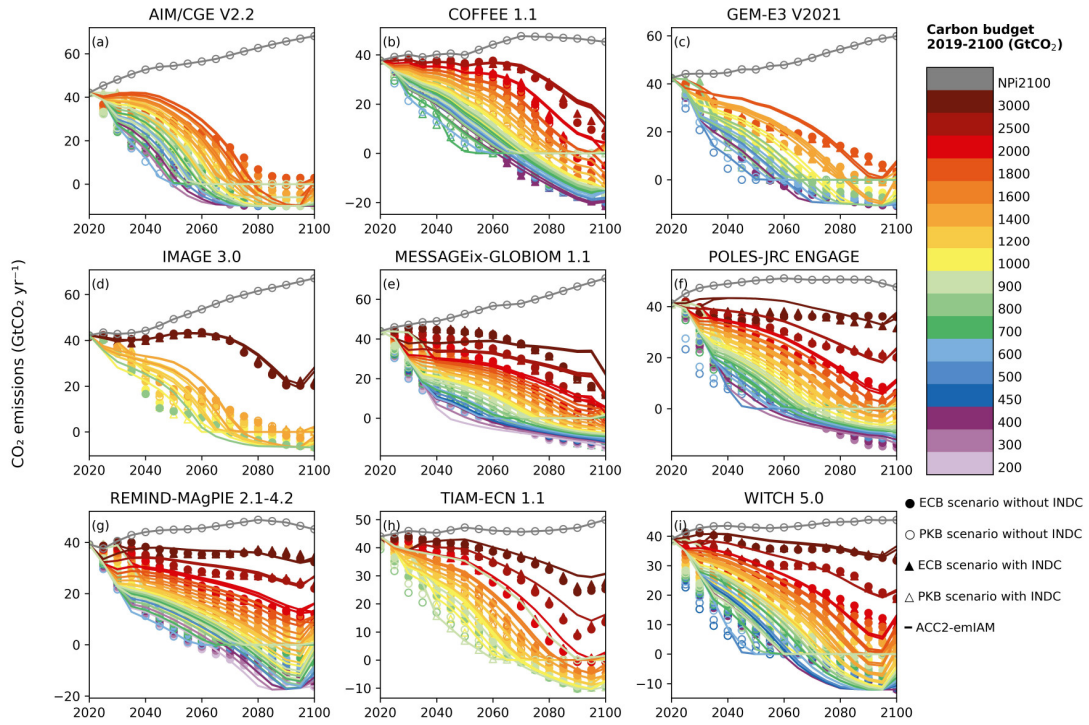

Figure S167. Test 3 – Global nine IAMs total anthropogenic CO<sub>2</sub> validation results

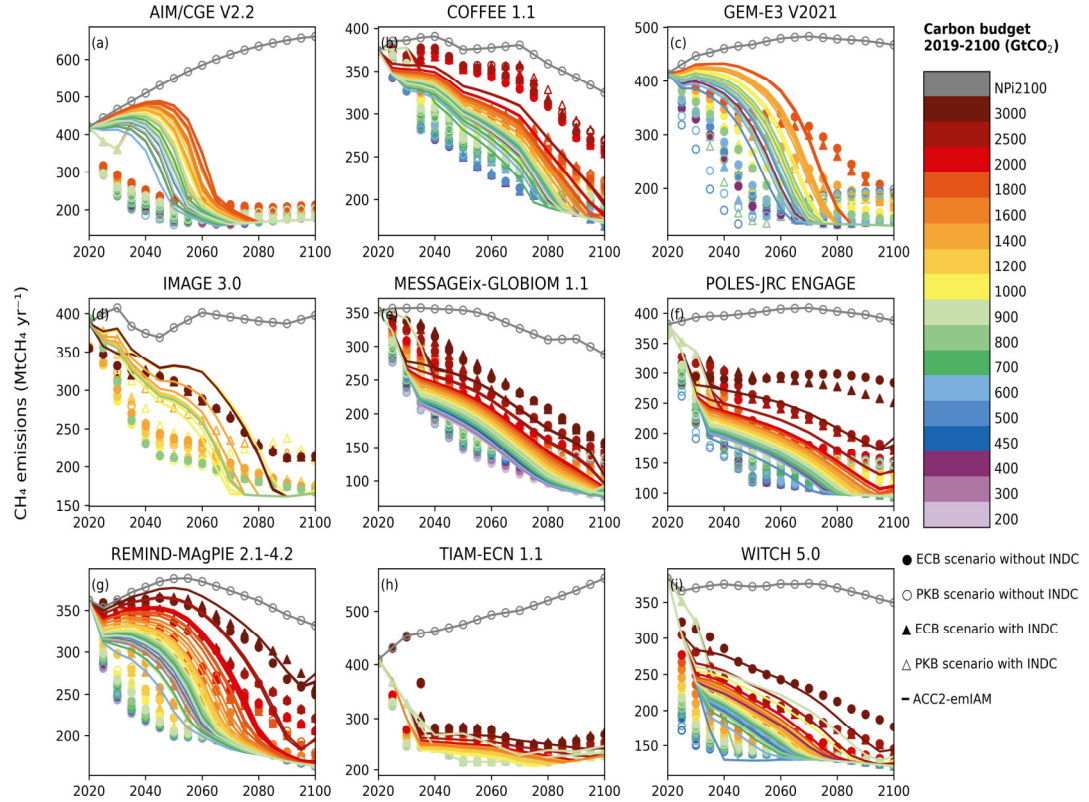

Figure S168. Test 3 – Global nine IAMs total anthropogenic CH<sub>4</sub> validation result



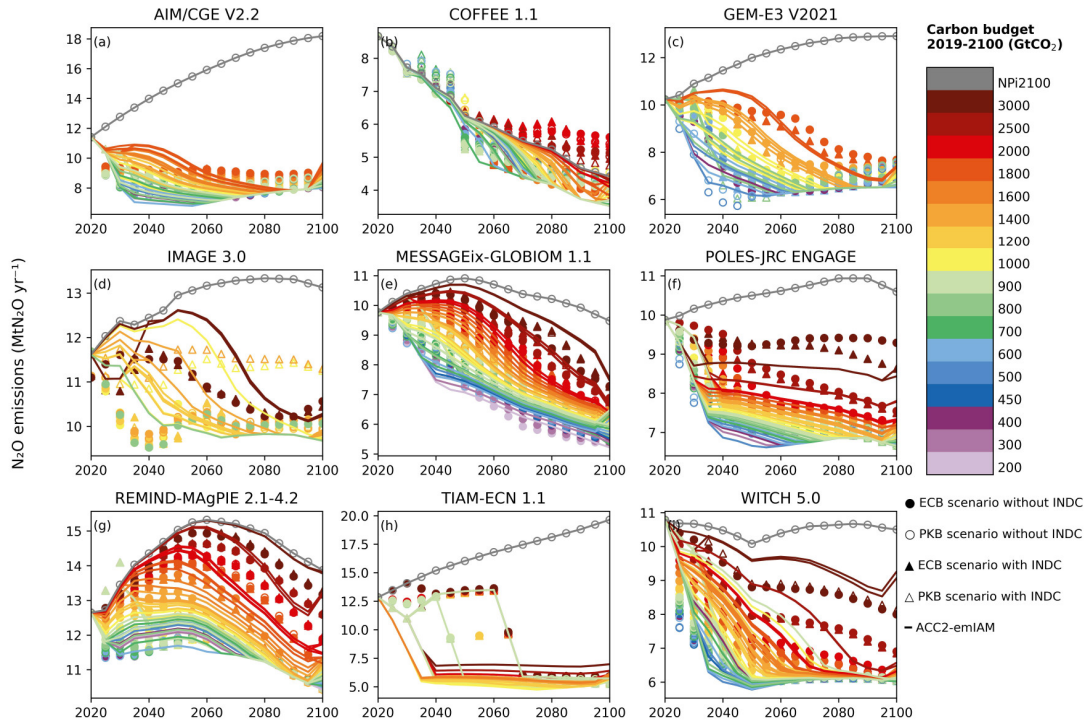

Figure S169. Test 3 – Global nine IAMs total anthropogenic N<sub>2</sub>O validation results

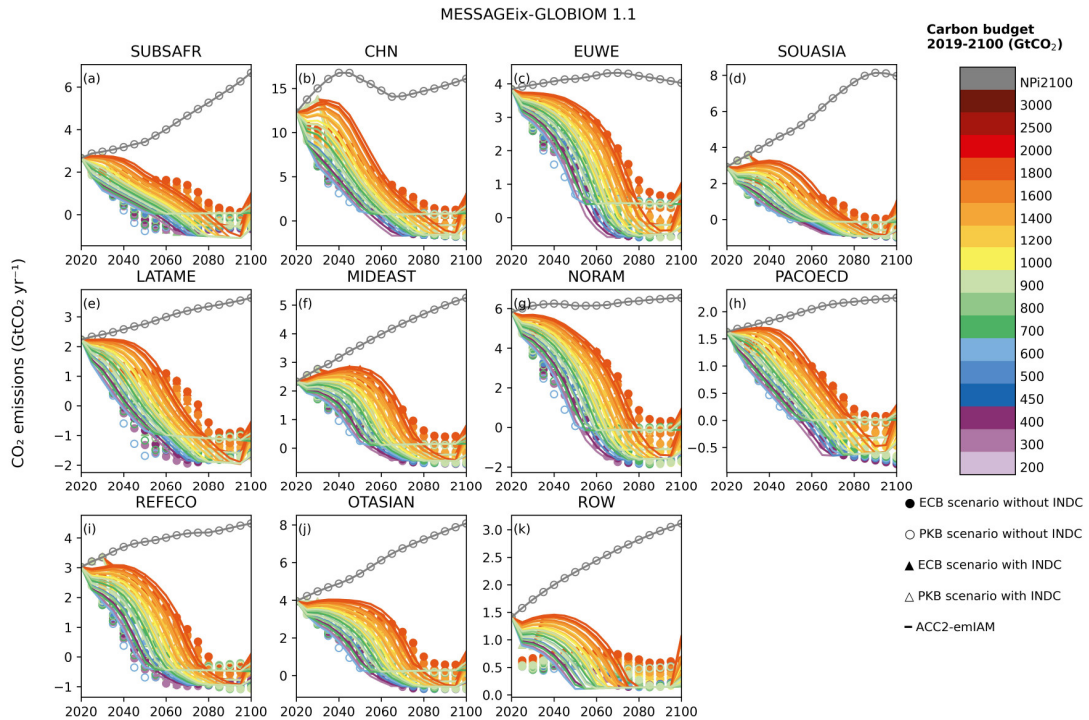

Figure S170. Test 3 - Regional AIM total anthropogenic CO<sub>2</sub> validation results



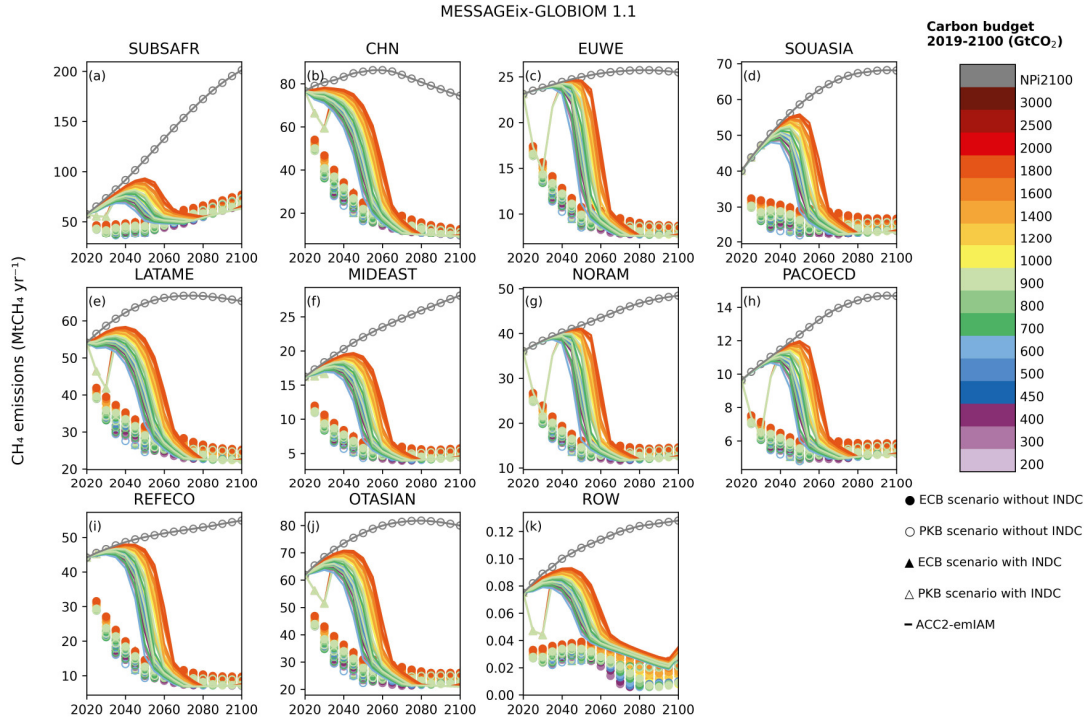

**Figure S171. Test 3 - Regional AIM total anthropogenic CH<sub>4</sub> validation results**

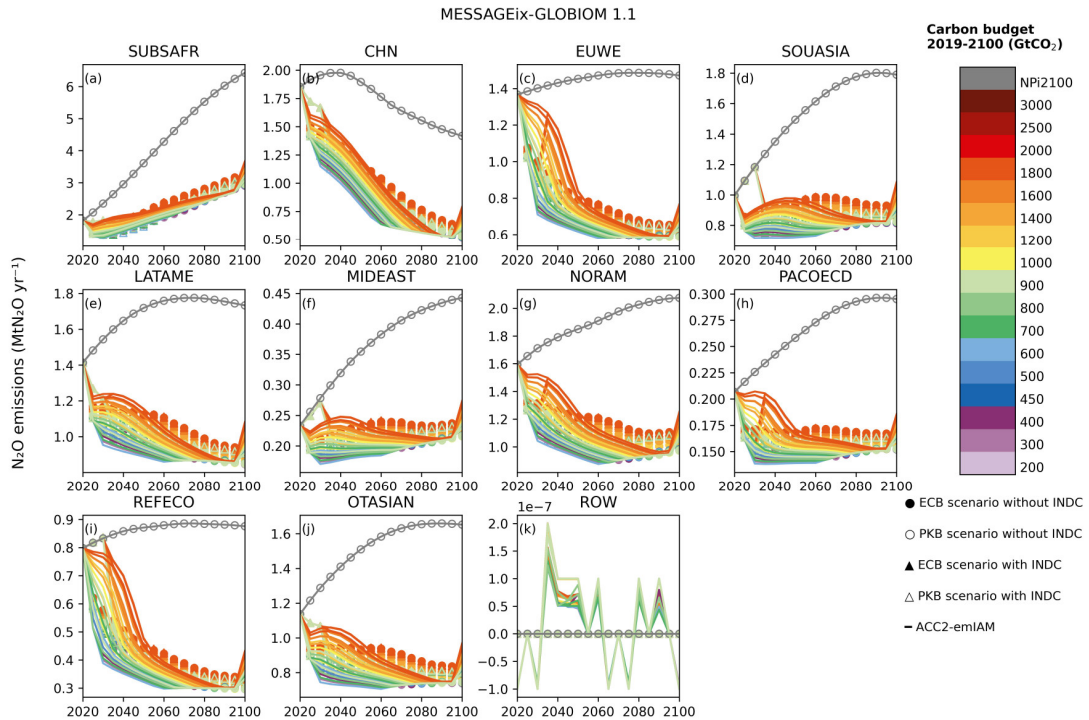

**Figure S172. Test 3 - Regional AIM total anthropogenic N<sub>2</sub>O validation results**

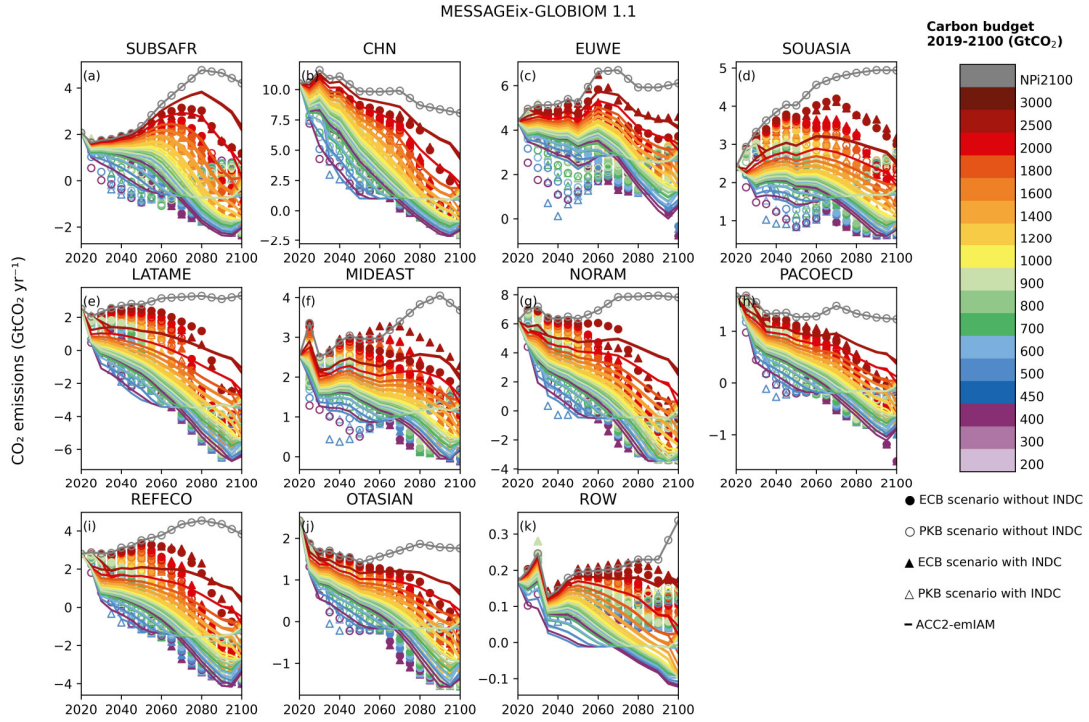

**Figure S173. Test 3 - Regional COFFEE total anthropogenic CO<sub>2</sub> validation results**

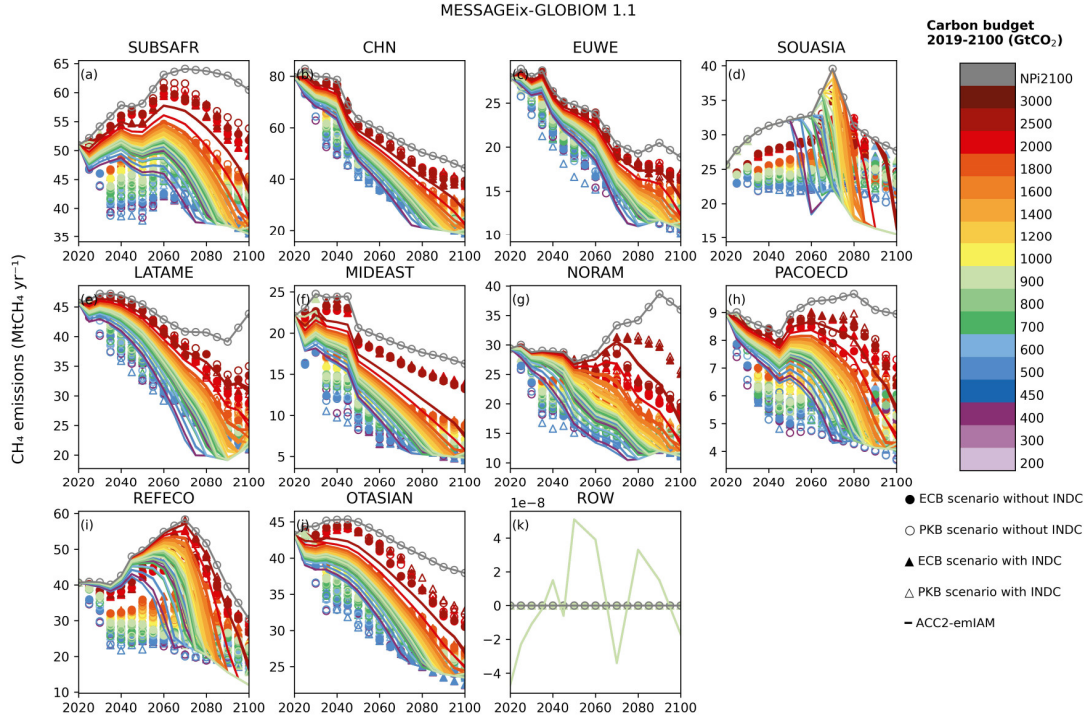

**Figure S174. Test 3 - Regional COFFEE total anthropogenic CH<sub>4</sub> validation results**

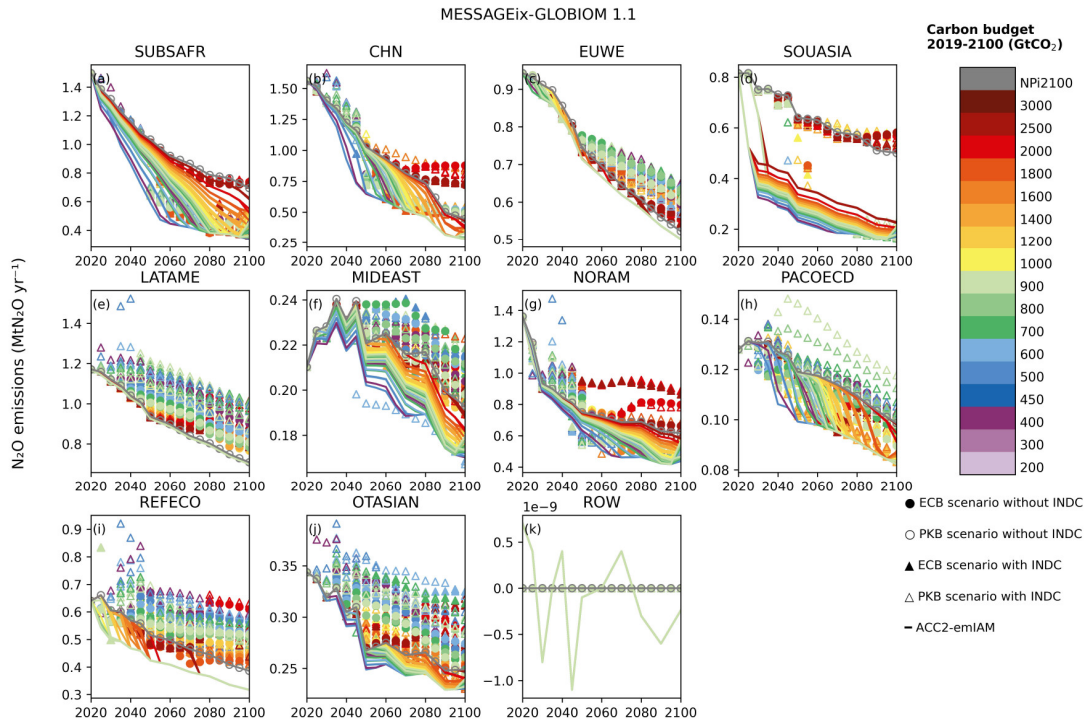

**Figure S175. Test 3 - Regional COFFEE total anthropogenic N<sub>2</sub>O validation results**

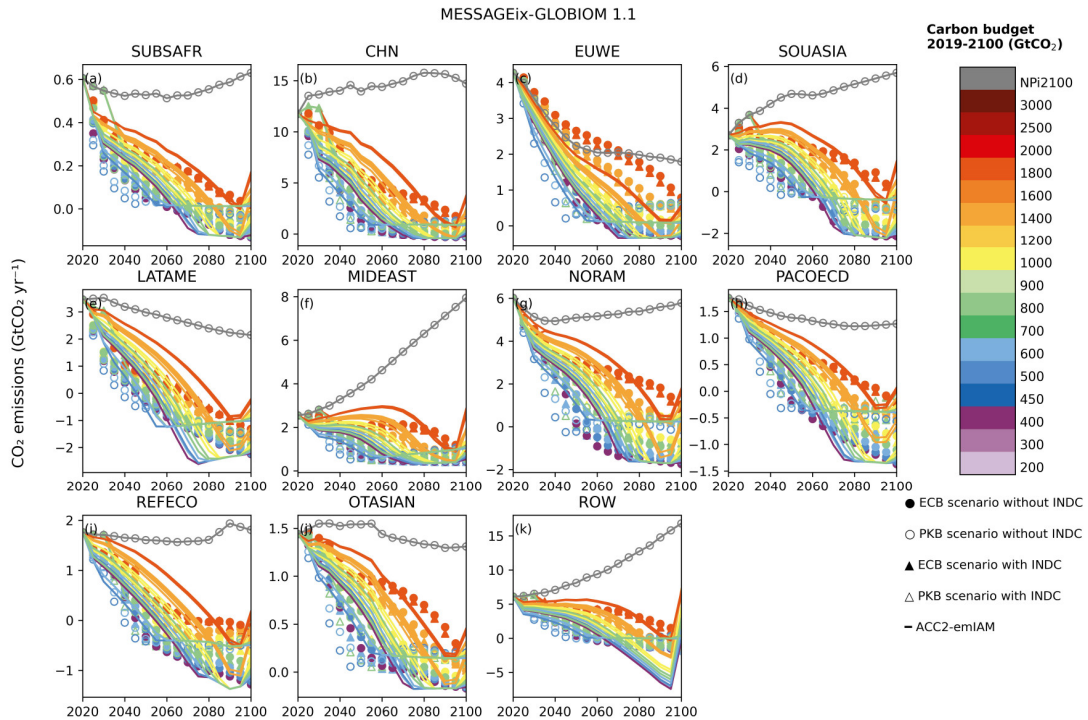

**Figure S176. Test 3 - Regional GEM total anthropogenic CO<sub>2</sub> validation results**



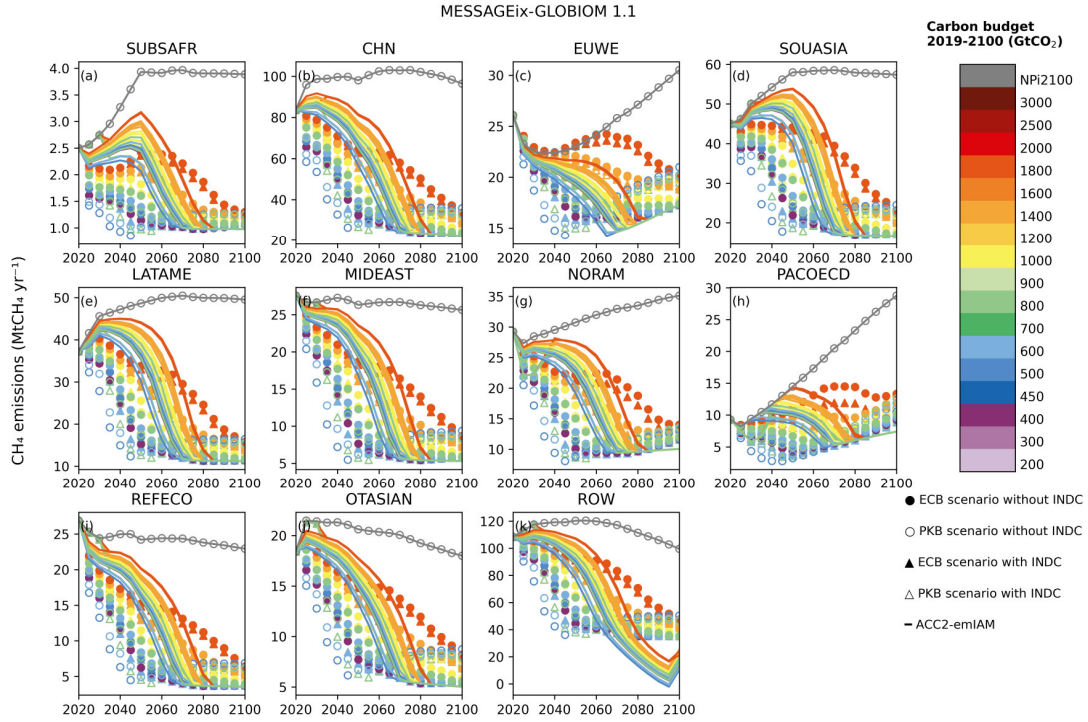

**Figure S177. Test 3 - Regional GEM total anthropogenic CH<sub>4</sub> validation results**

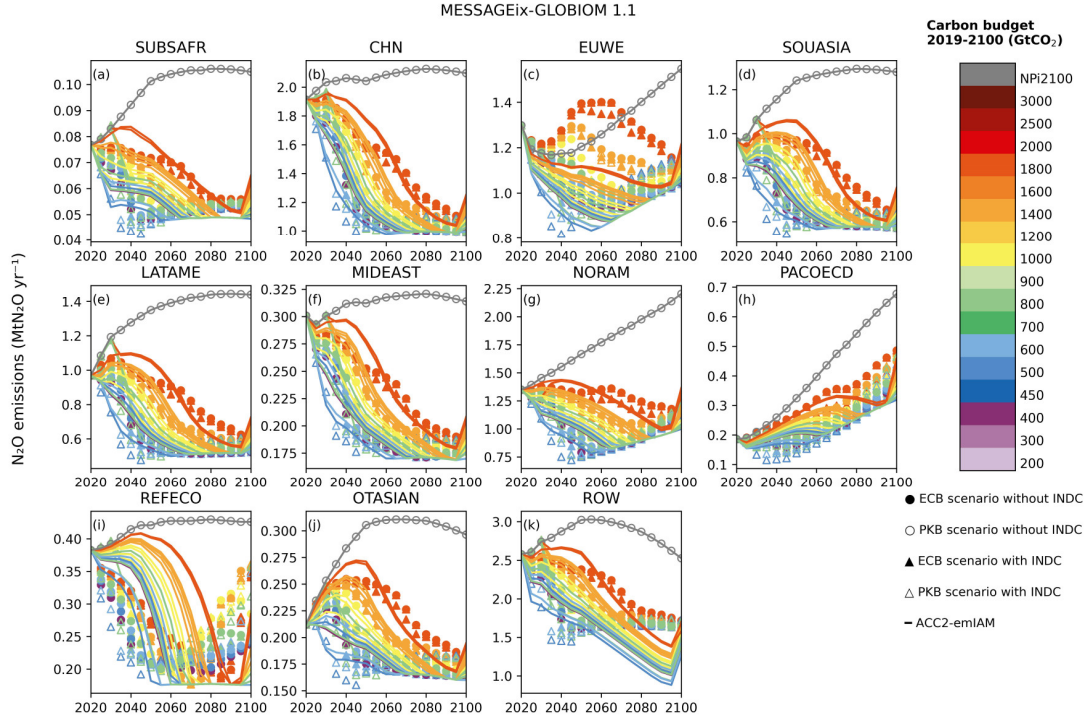

**Figure S178. Test 3 - Regional GEM total anthropogenic N<sub>2</sub>O validation results**

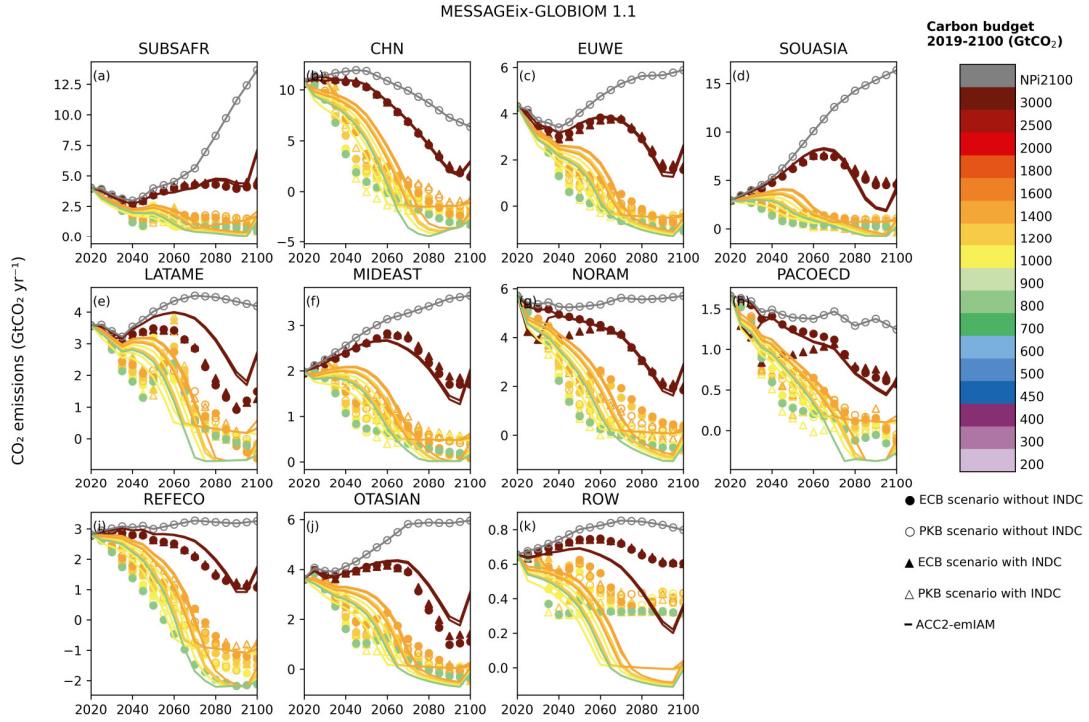

**Figure S179. Test 3 - Regional IMAGE total anthropogenic CO<sub>2</sub> validation results**

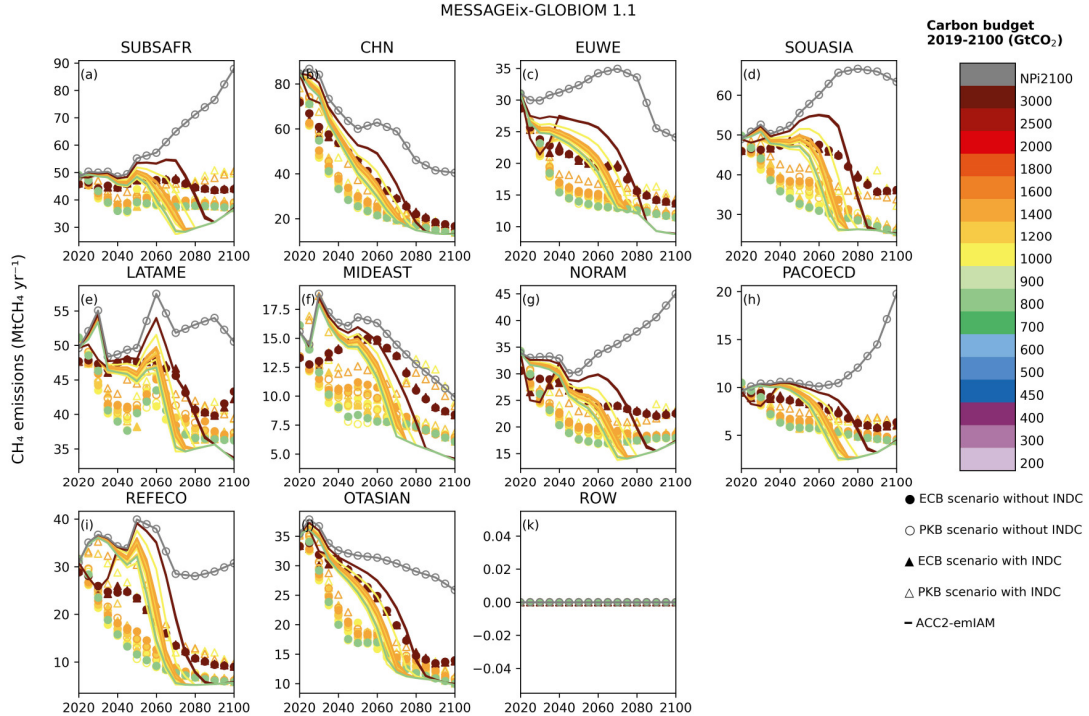

**Figure S180. Test 3 - Regional IMAGE total anthropogenic CH<sub>4</sub> validation results**



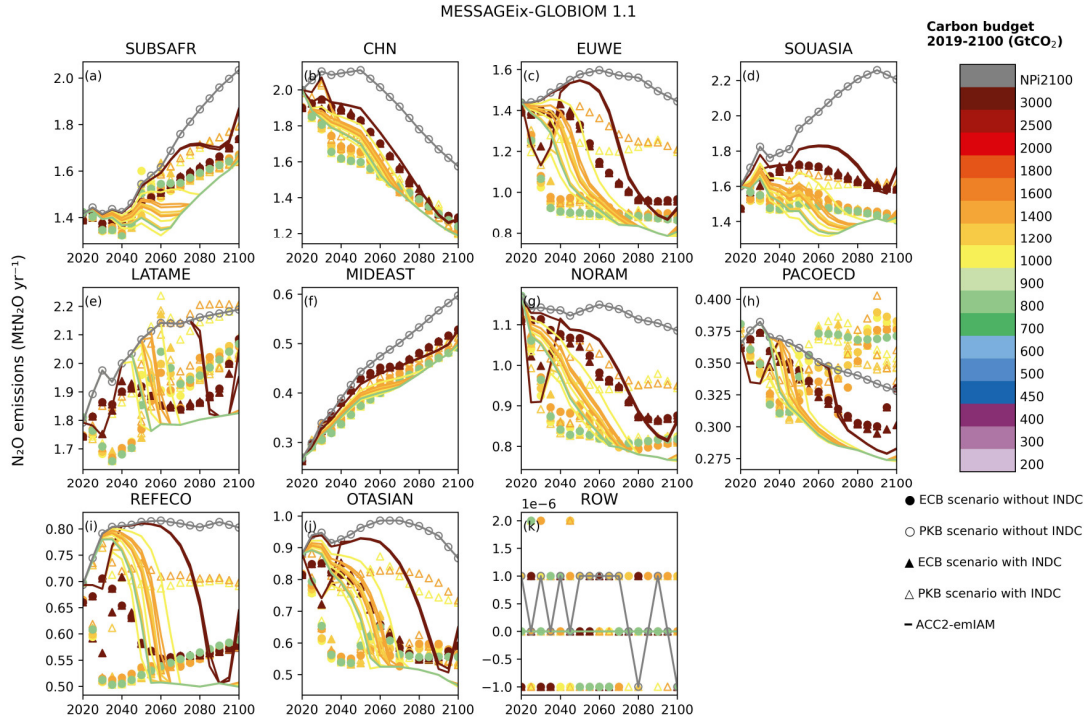

**Figure S181. Test 3 - Regional IMAGE total anthropogenic N<sub>2</sub>O validation results**

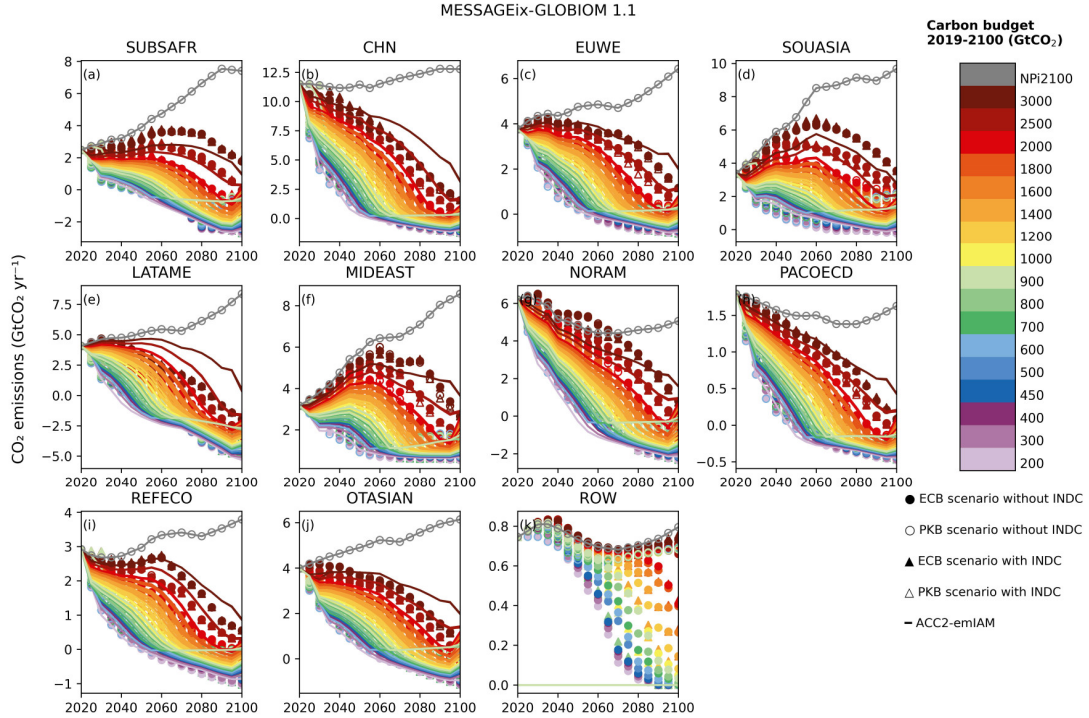

**Figure S182. Test 3 - Regional MESSAGE total anthropogenic CO<sub>2</sub> validation results**

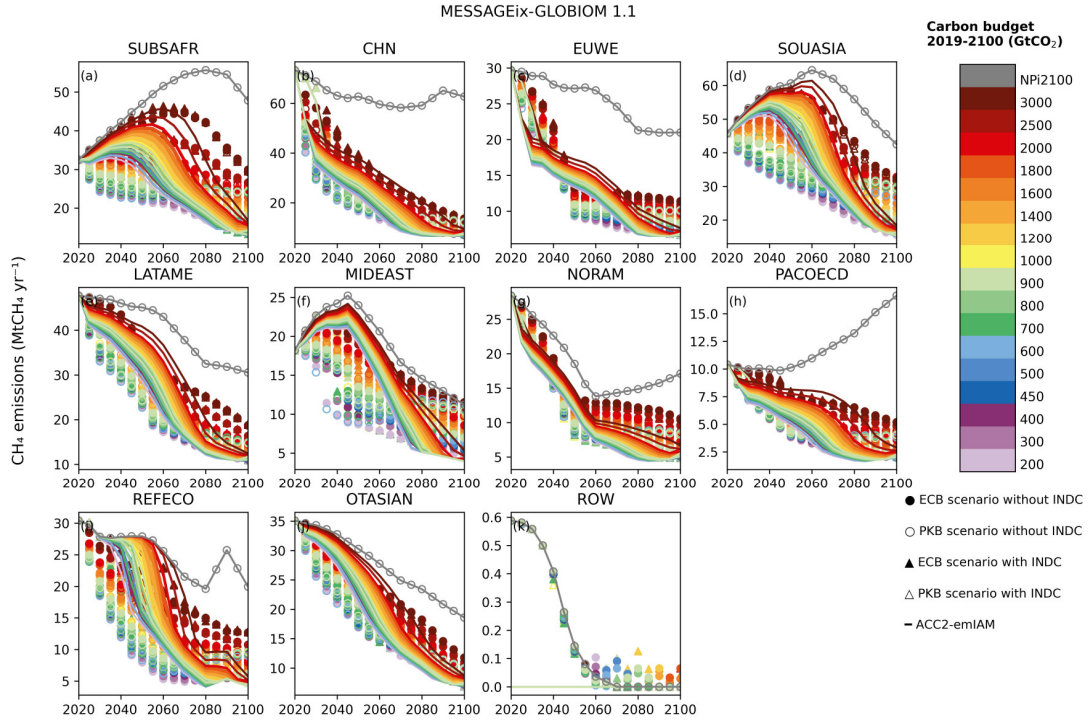

**Figure S183. Test 3 - Regional MESSAGE total anthropogenic CH<sub>4</sub> validation results**

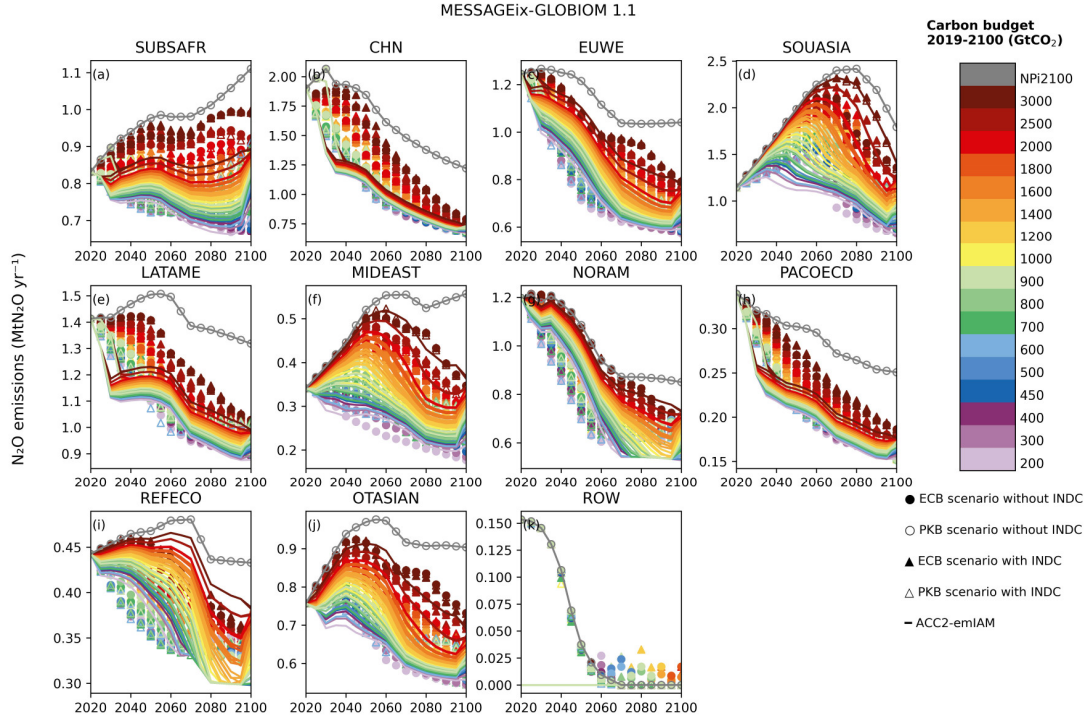

**Figure S184. Test 3 - Regional MESSAGE total anthropogenic N<sub>2</sub>O validation results**

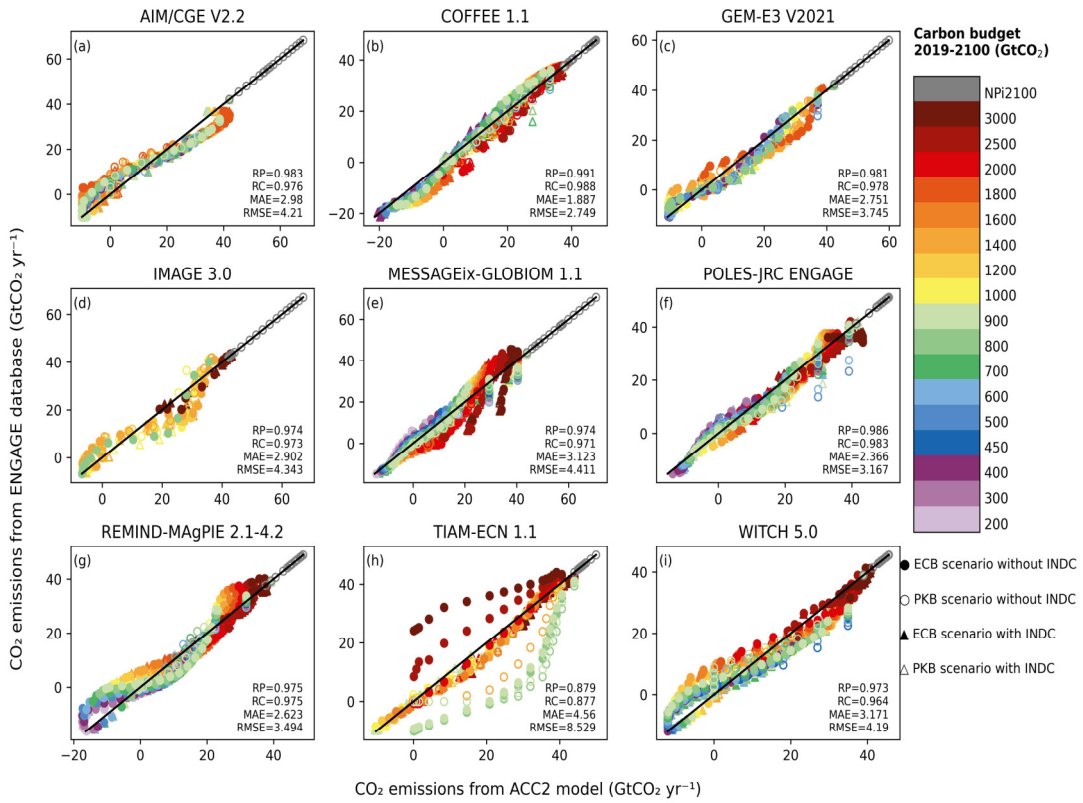

Figure S185. Test 3 - Global nine IAMs - Reproducibility of total anthropogenic CO<sub>2</sub>

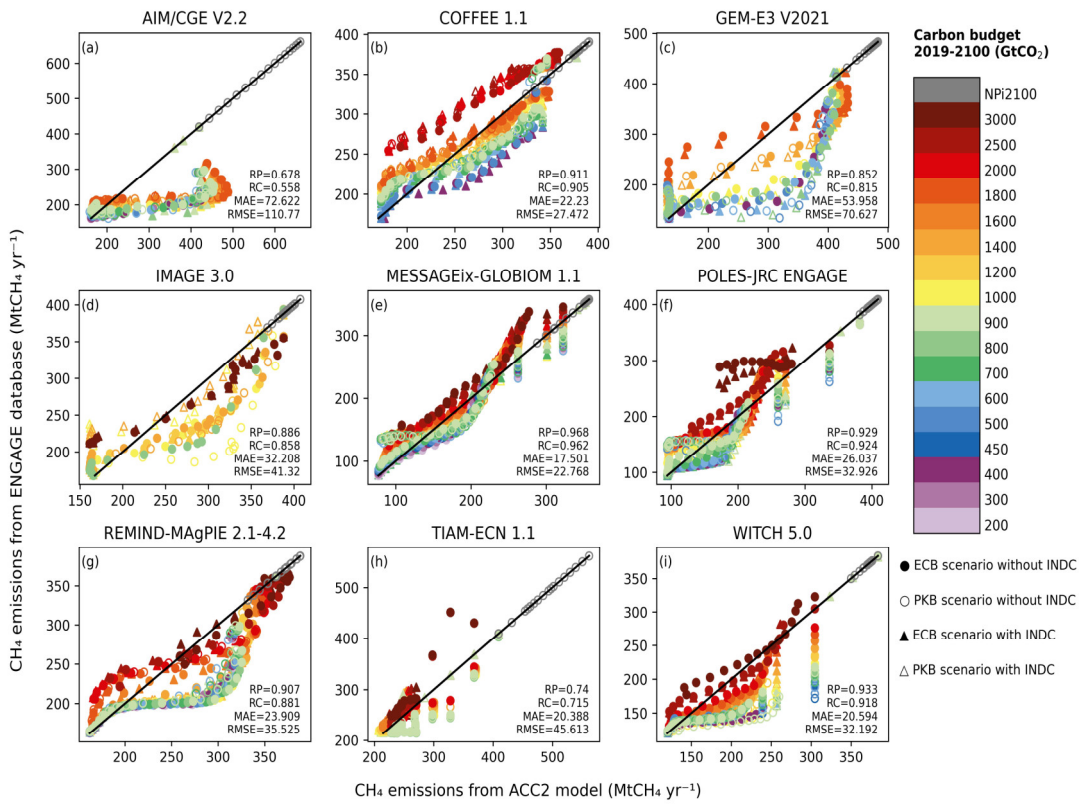

Figure S186. Test 3 - Global nine IAMs - Reproducibility of total anthropogenic CH<sub>4</sub>



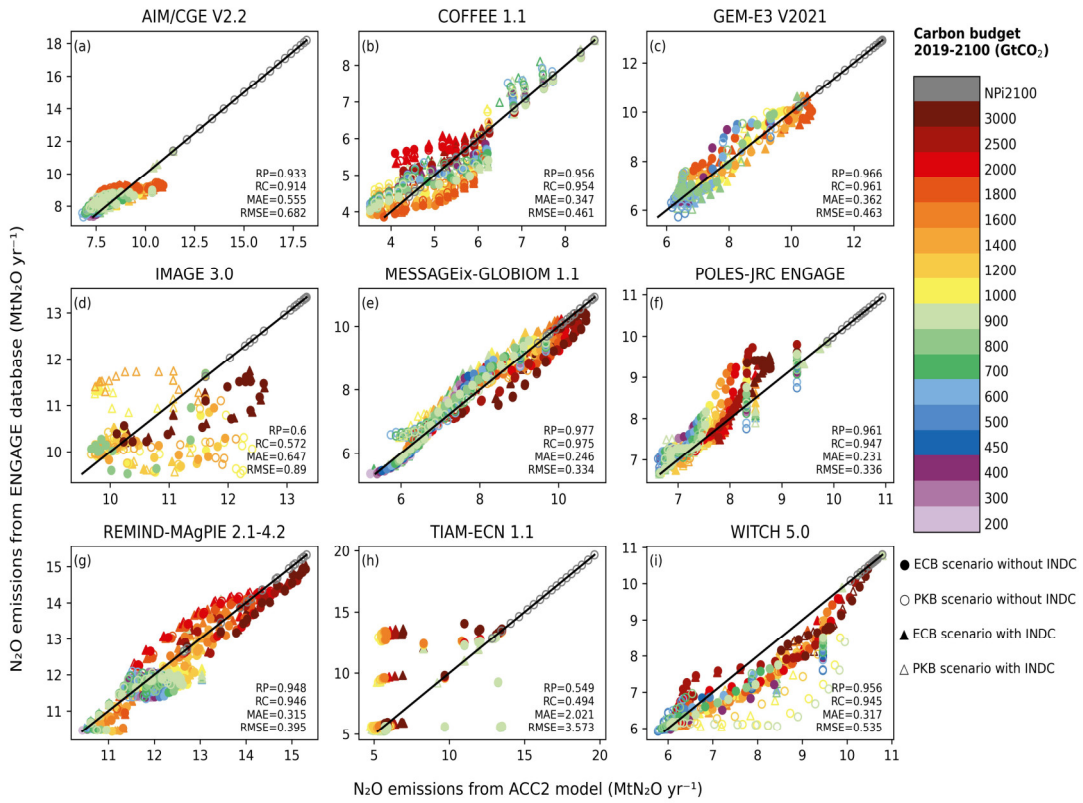

Figure S187. Test 3 - Global nine IAMs - Reproducibility of total anthropogenic  $N_2O$

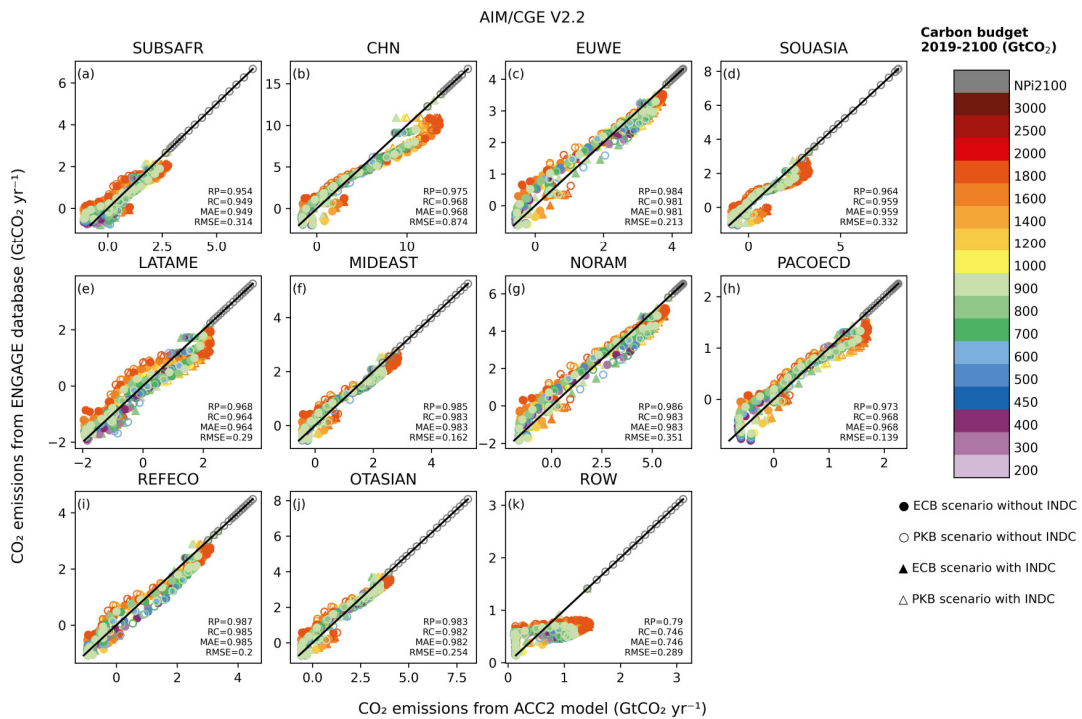

Figure S188. Test 3 - Regional AIM - Reproducibility of total anthropogenic  $CO_2$

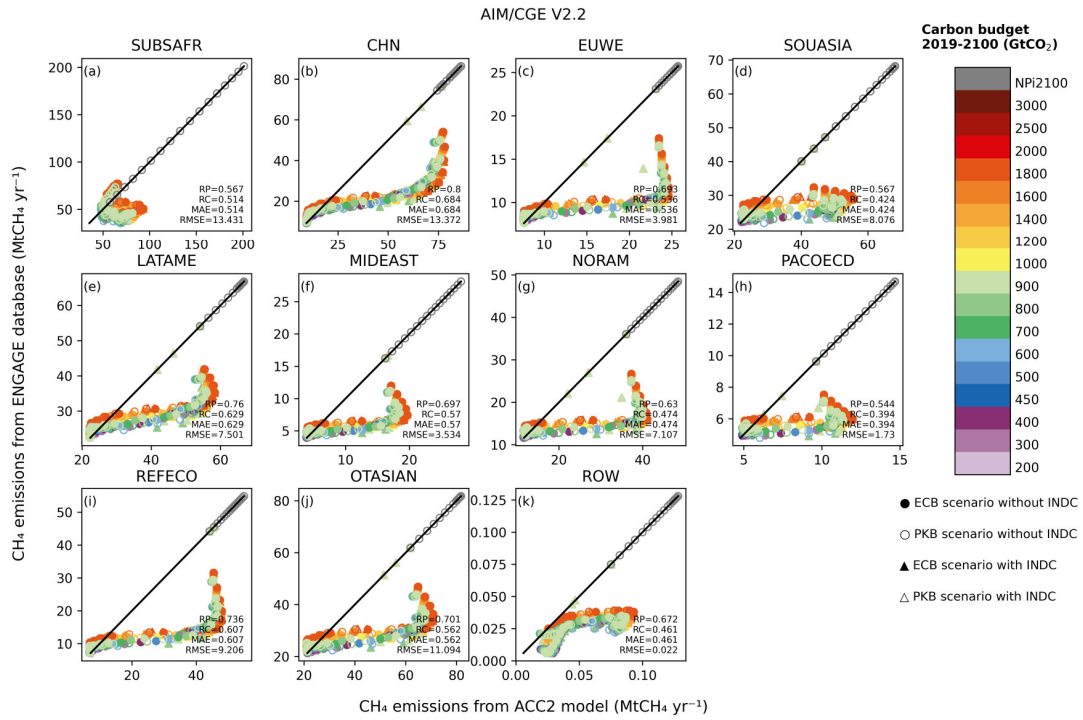

**Figure S189. Test 3 - Regional AIM - Reproducibility of total anthropogenic CH<sub>4</sub>**

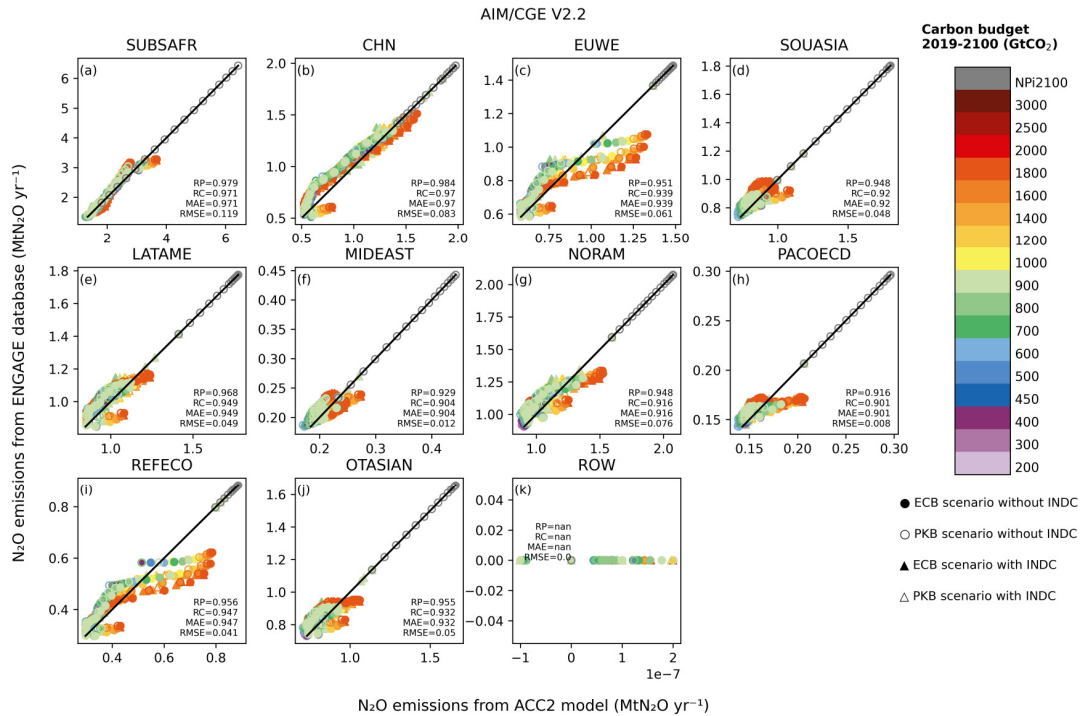

**Figure S190. Test 3 - Regional AIM - Reproducibility of total anthropogenic N<sub>2</sub>O**



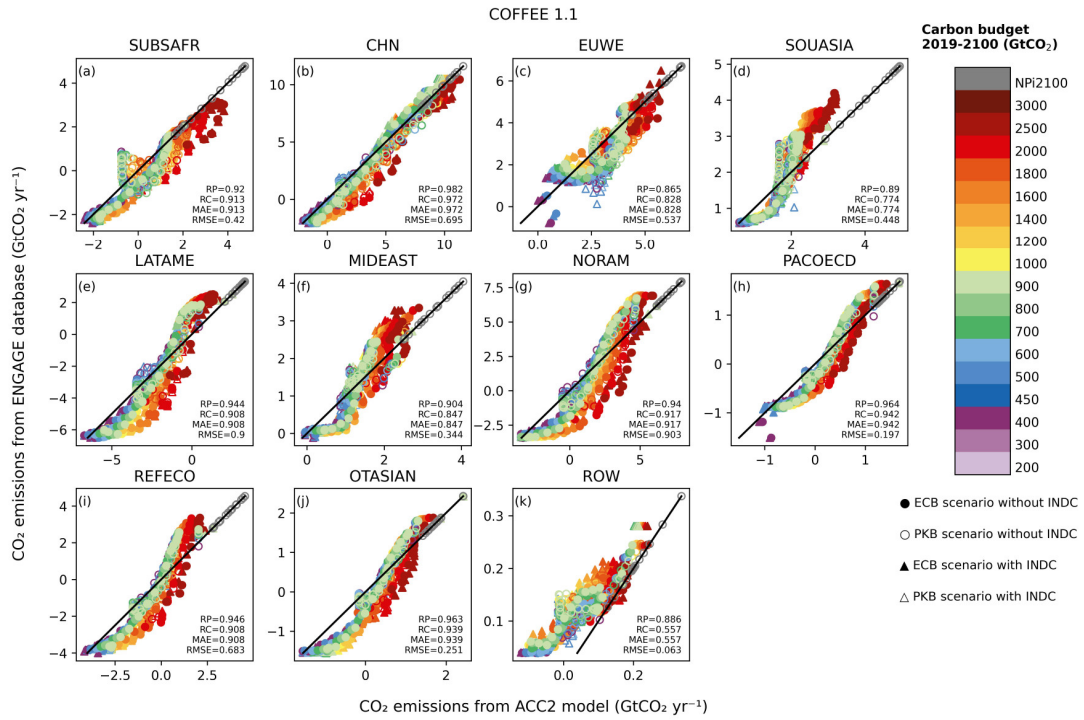

**Figure S191. Test 3 - Regional COFFEE - Reproducibility of total anthropogenic CO<sub>2</sub>**

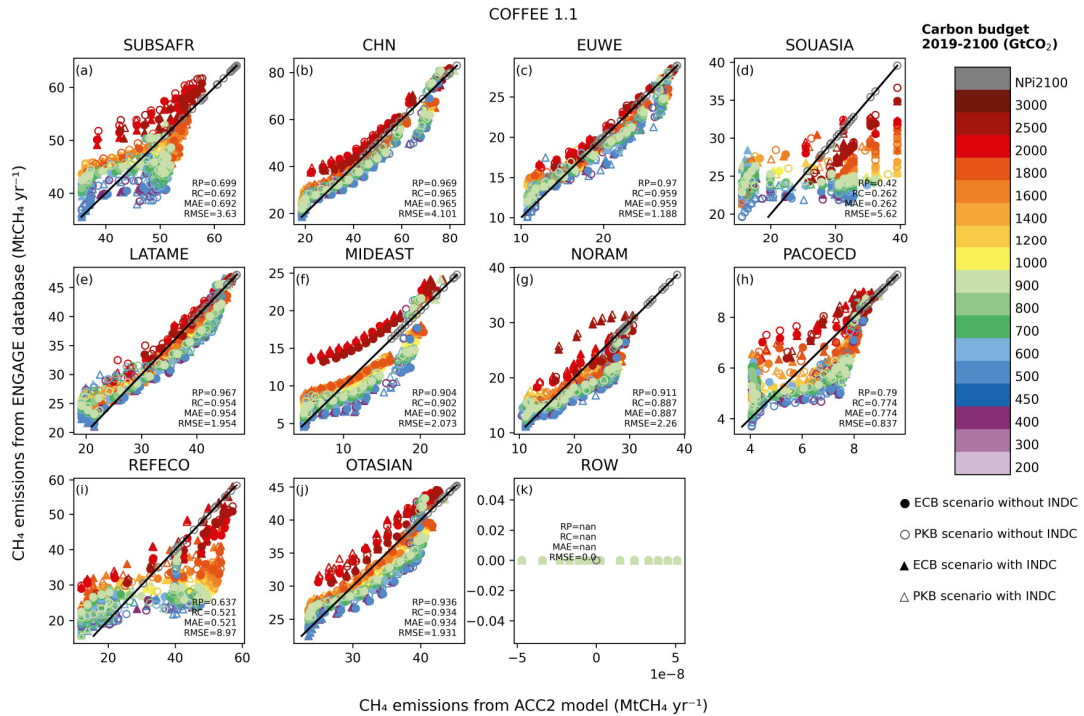

**Figure S192. Test 3 - Regional COFFEE - Reproducibility of total anthropogenic CH<sub>4</sub>**

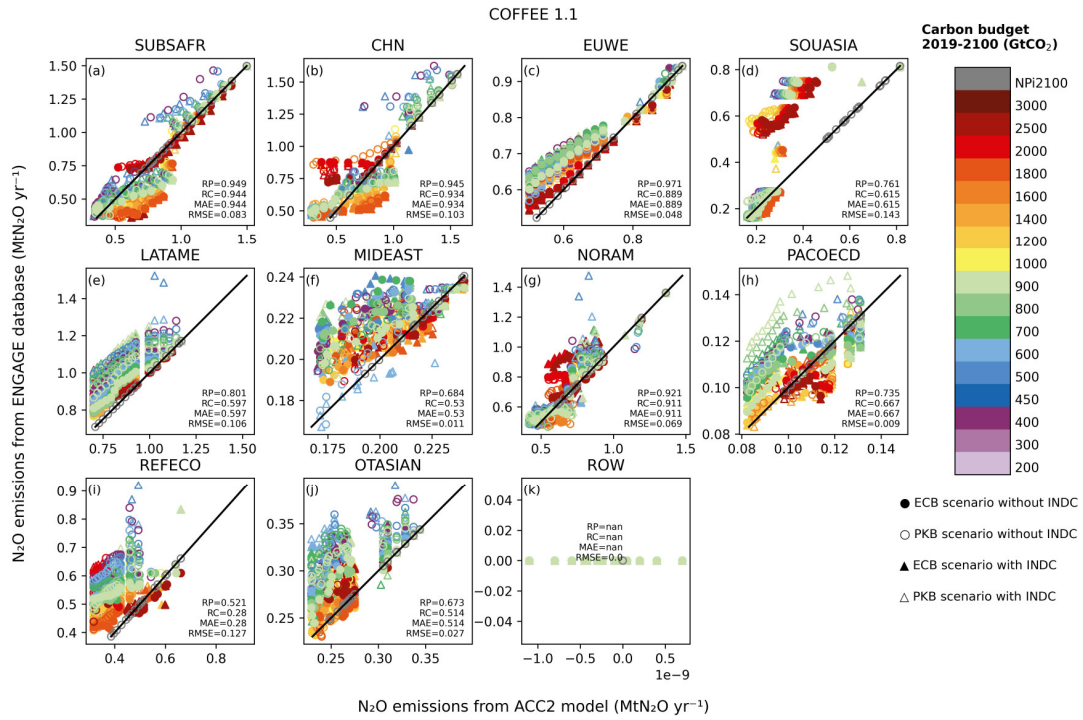

**Figure S193. Test 3 - Regional COFFEE - Reproducibility of total anthropogenic N<sub>2</sub>O**

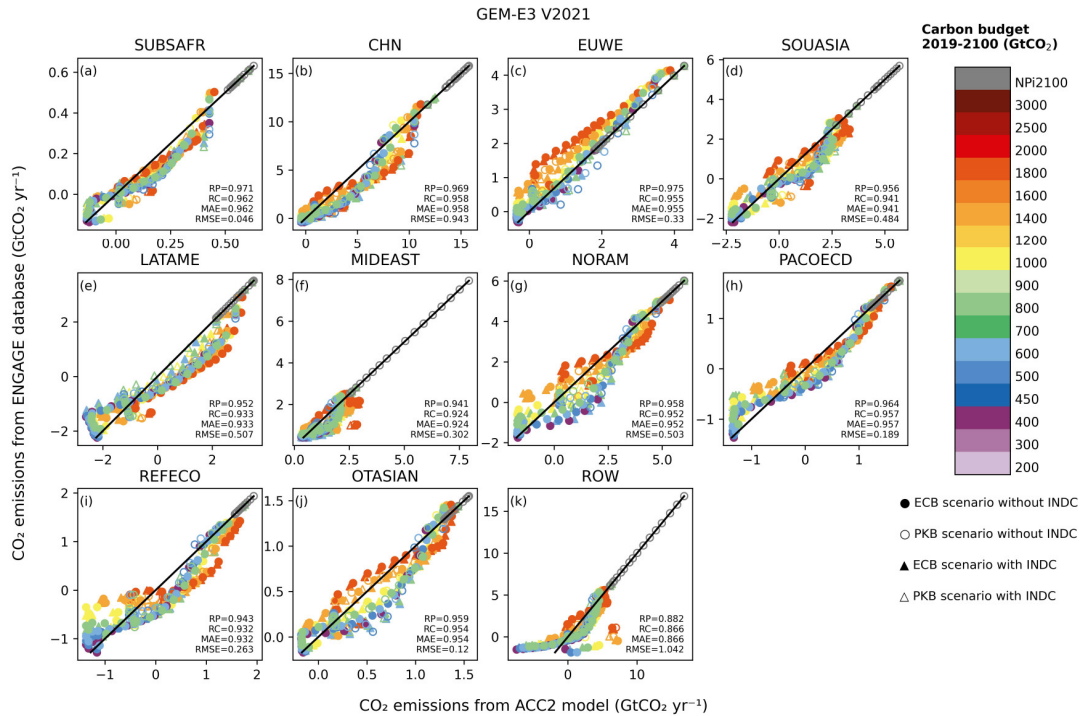

**Figure S194. Test 3 - Regional GEM - Reproducibility of total anthropogenic CO<sub>2</sub>**

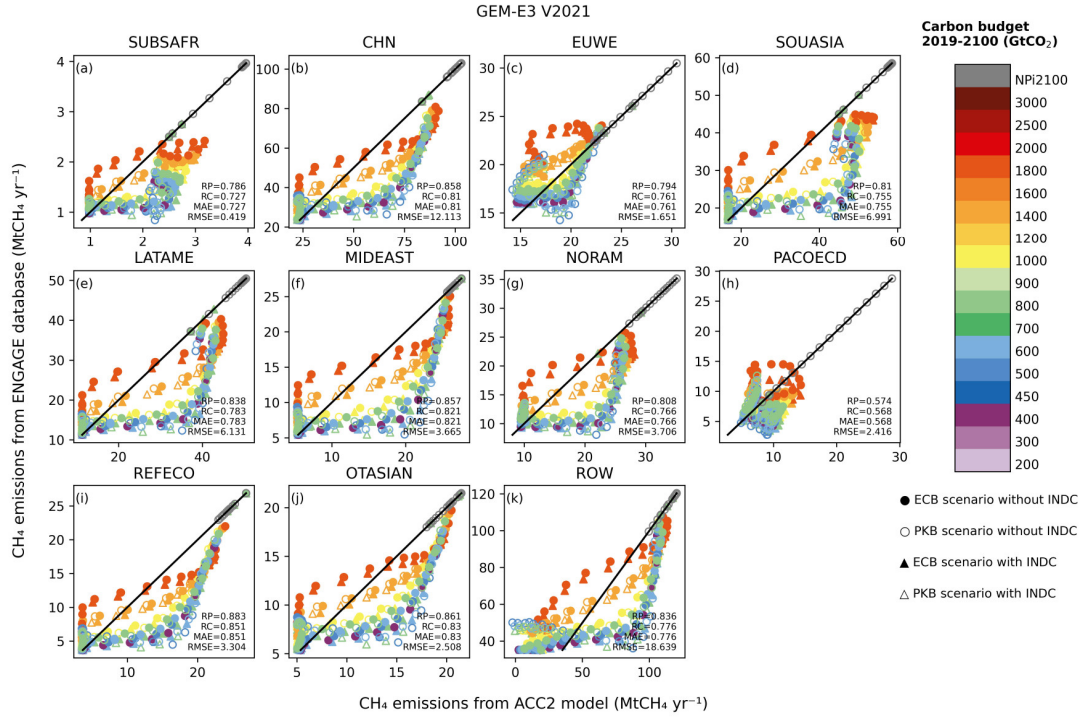

**Figure S195. Test 3 - Regional GEM - Reproducibility of total anthropogenic CH<sub>4</sub>**

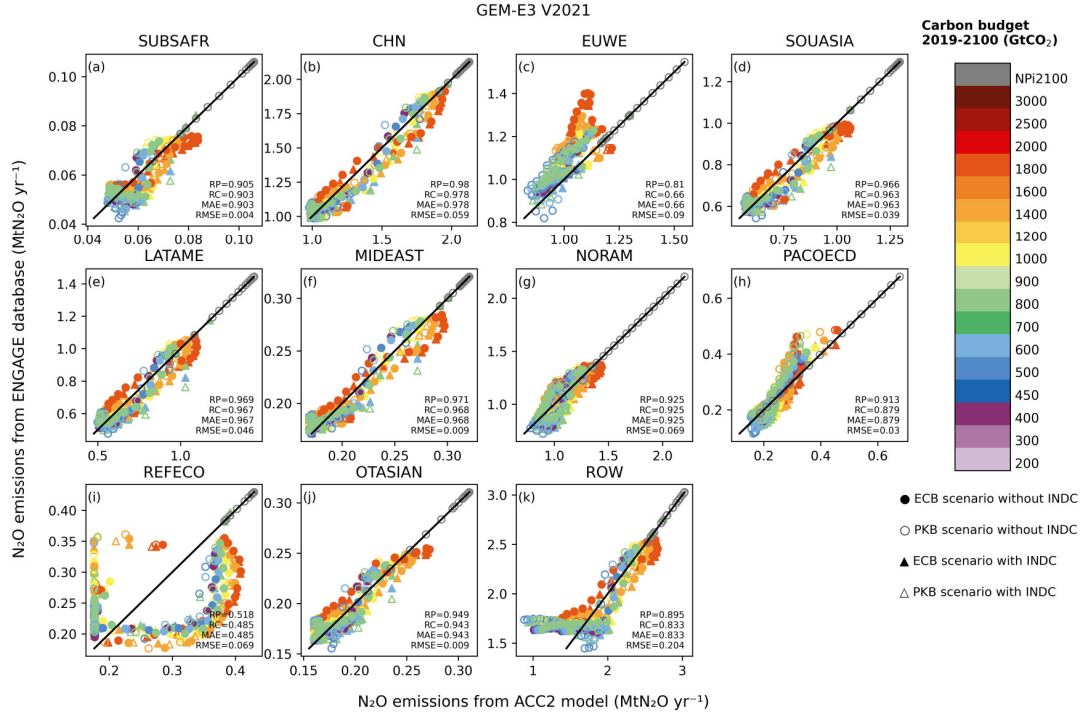

**Figure S196. Test 3 - Regional GEM - Reproducibility of total anthropogenic N<sub>2</sub>O**

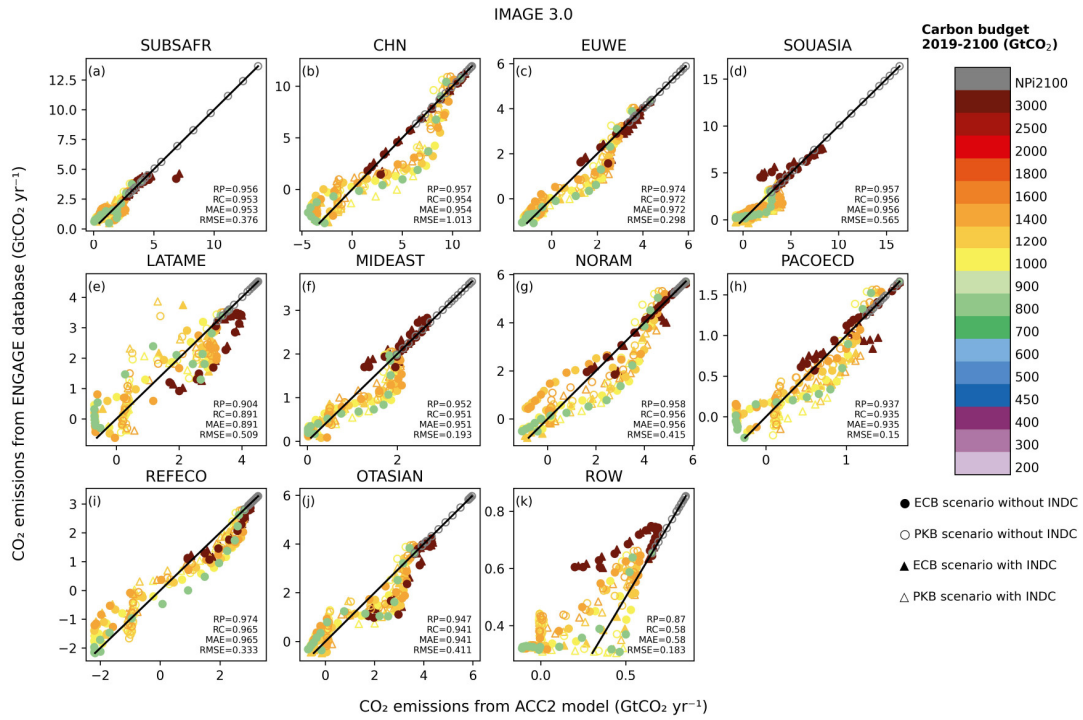

**Figure S197. Test 3 - Regional IMAGE - Reproducibility of total anthropogenic CO<sub>2</sub>**

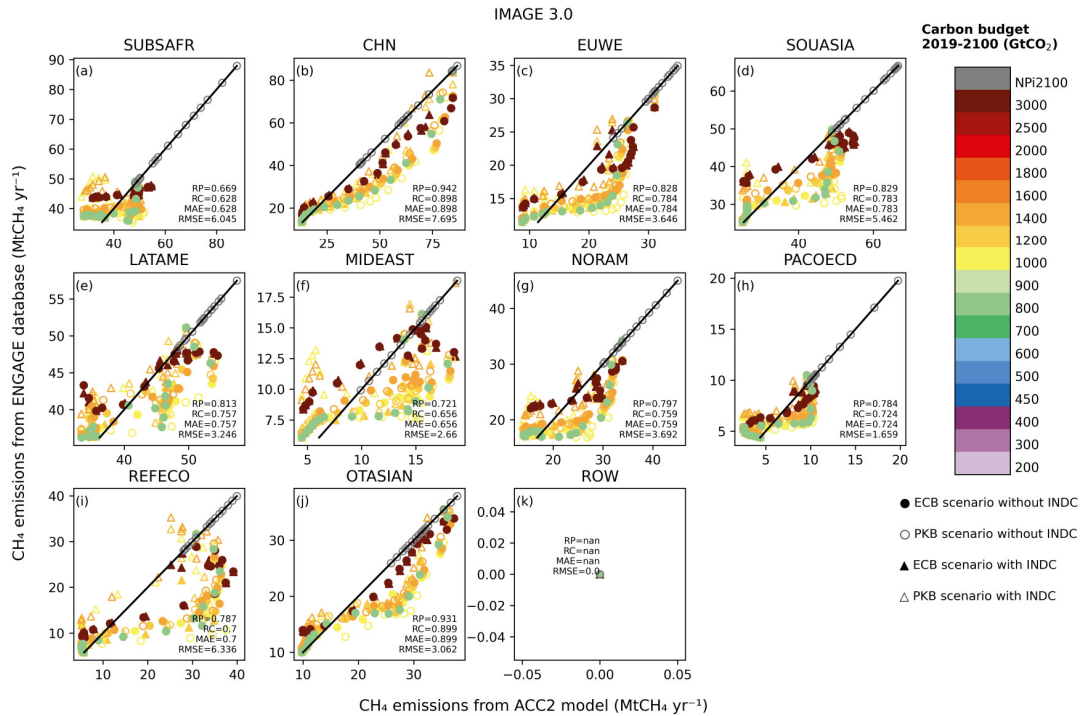

**Figure S198. Test 3 - Regional IMAGE - Reproducibility of total anthropogenic CH<sub>4</sub>**



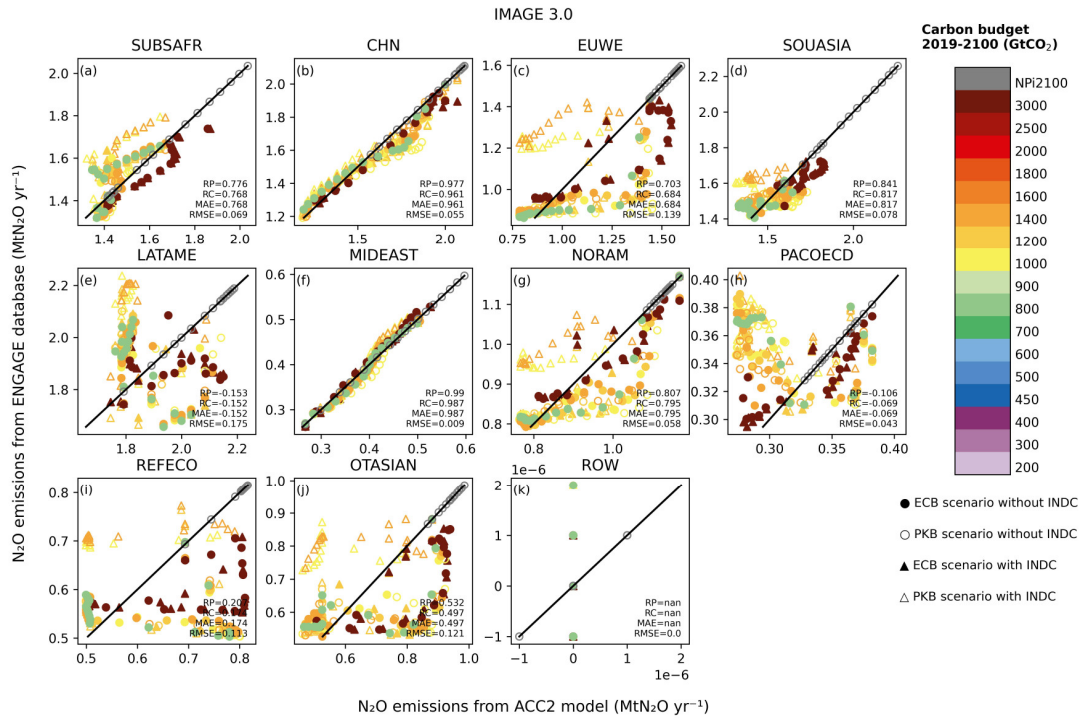

**Figure S199. Test 3 - Regional IMAGE - Reproducibility of total anthropogenic N<sub>2</sub>O**

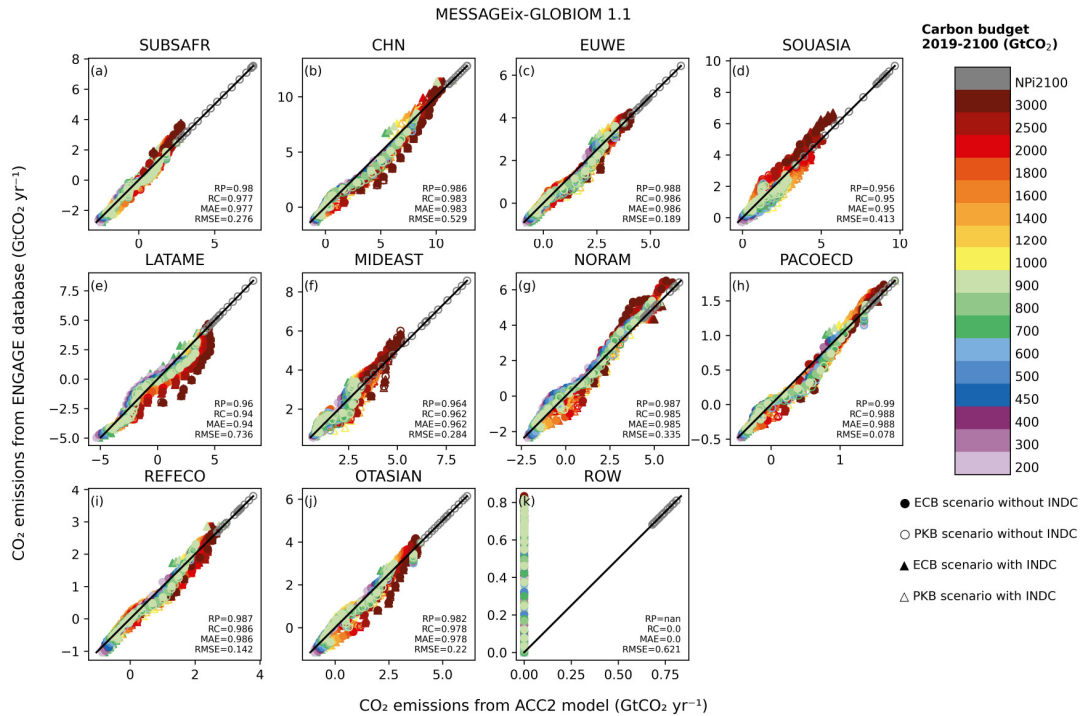

**Figure S200. Test 3 - Regional MESSAGE - Reproducibility of total anthropogenic CO<sub>2</sub>**



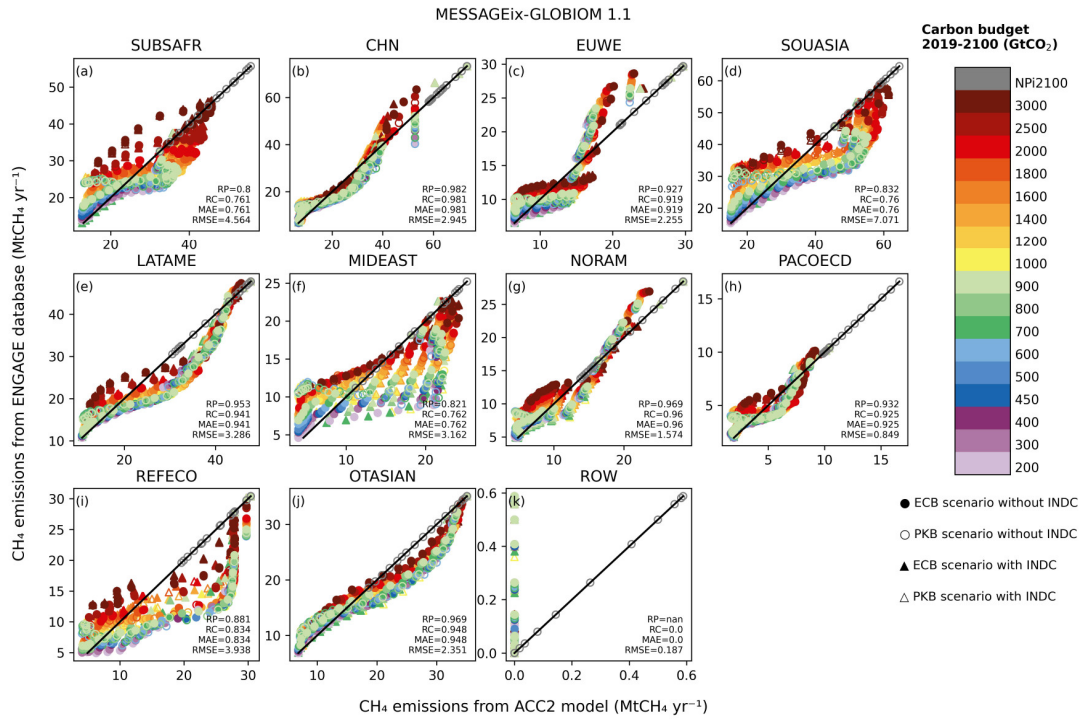

**Figure S201. Test 3 - Regional MESSAGE - Reproducibility of total anthropogenic CH<sub>4</sub>**

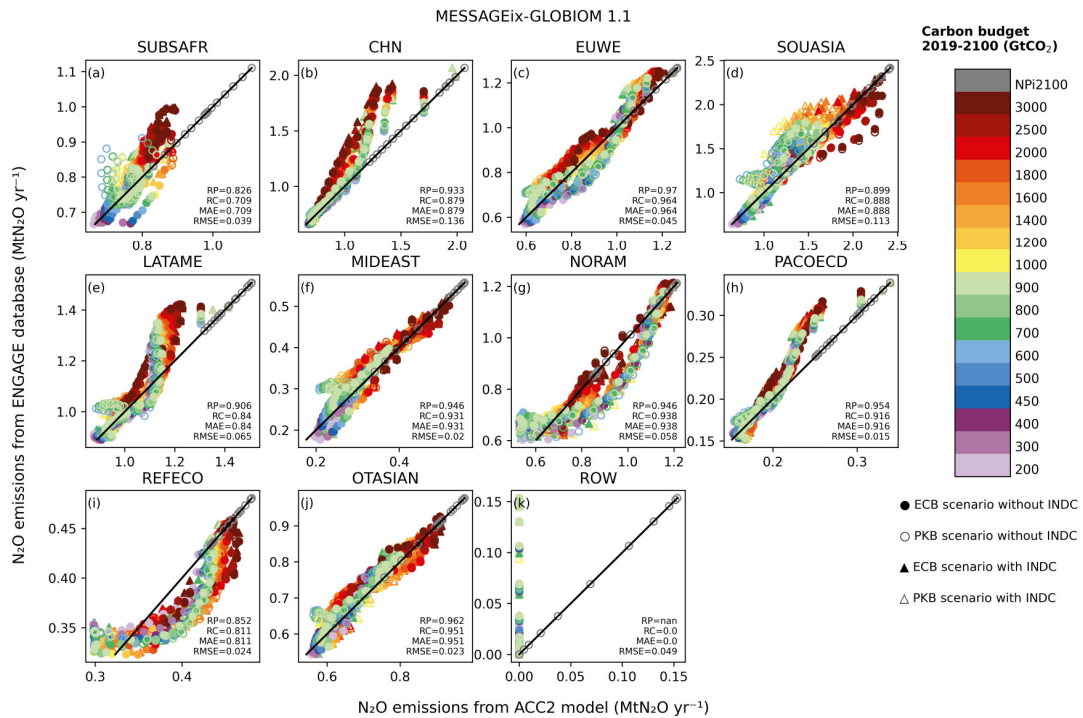

**Figure S202. Test 3 - Regional MESSAGE - Reproducibility of total anthropogenic N<sub>2</sub>O**

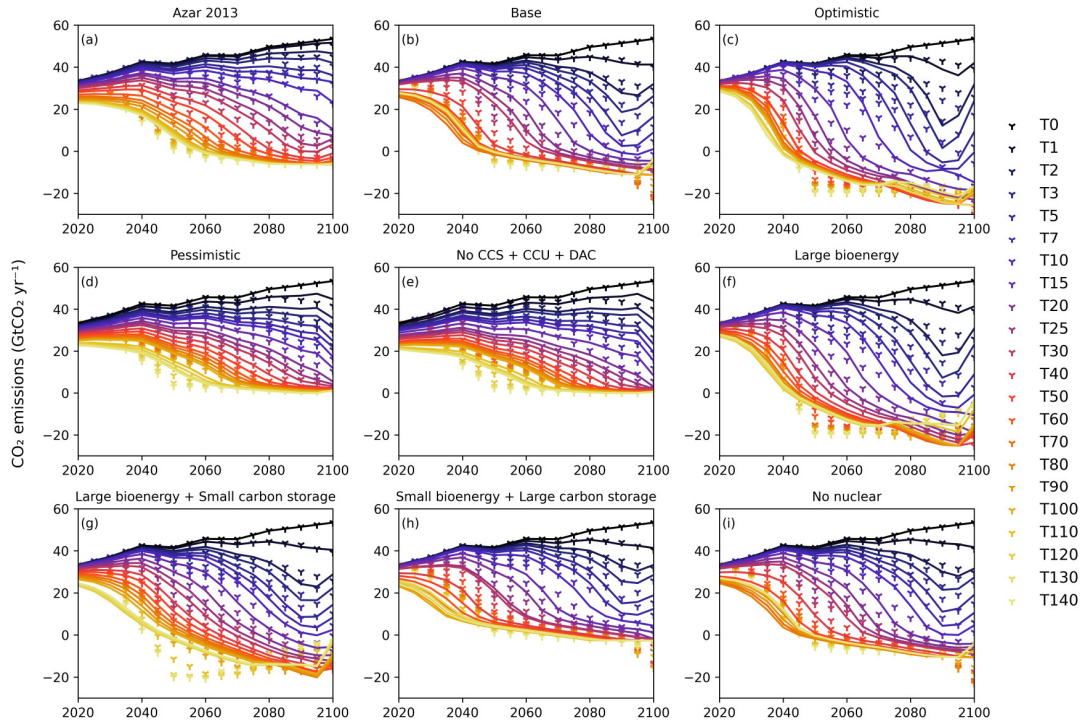

Figure S203. Test 4 – GET nine portfolios energy-related CO<sub>2</sub> validation results

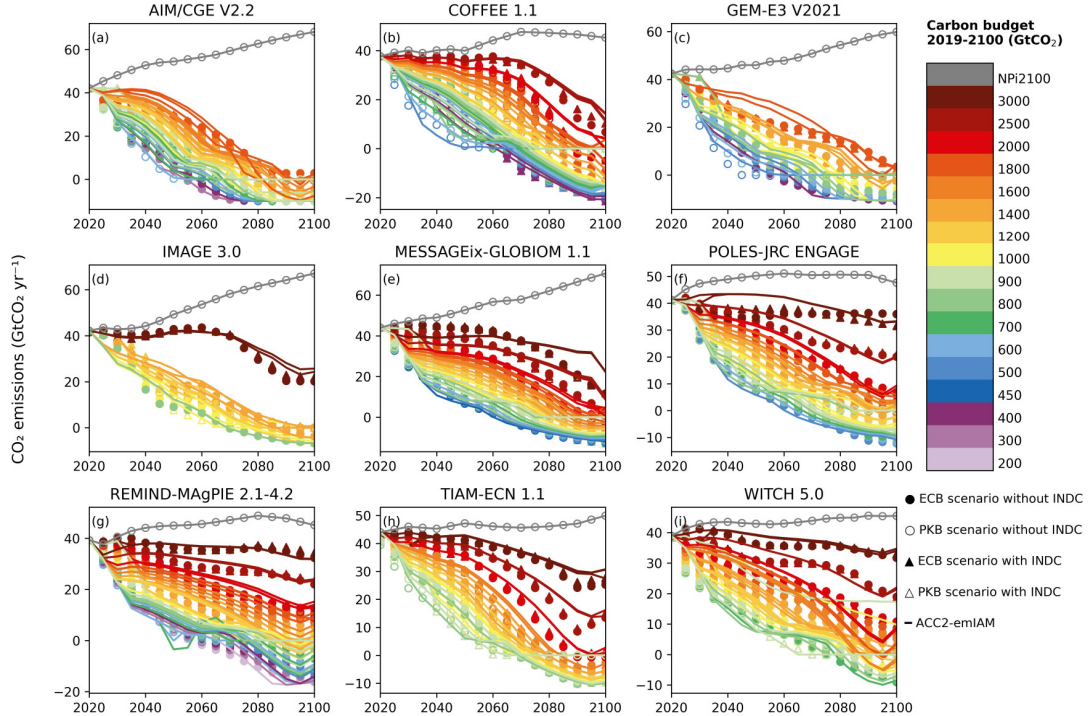

Figure S204. Test 4 – Global nine IAMs total anthropogenic CO<sub>2</sub> validation results

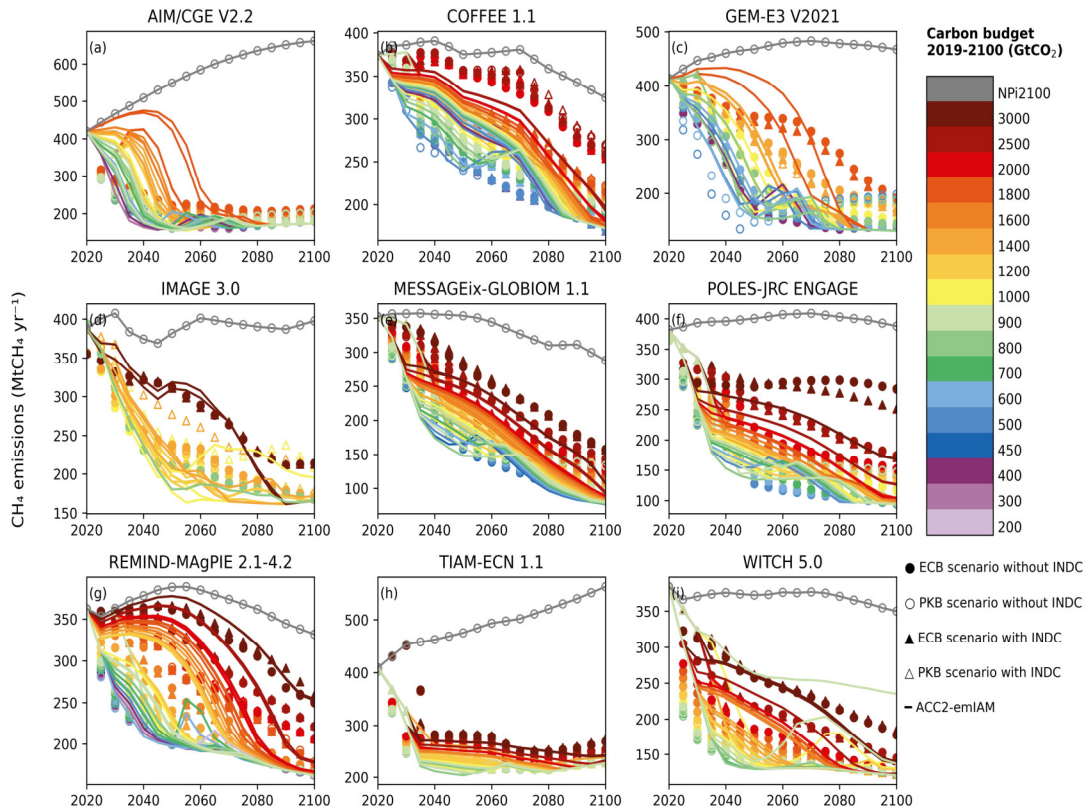

Figure S205. Test 4 – Global nine IAMs total anthropogenic CH<sub>4</sub> validation results

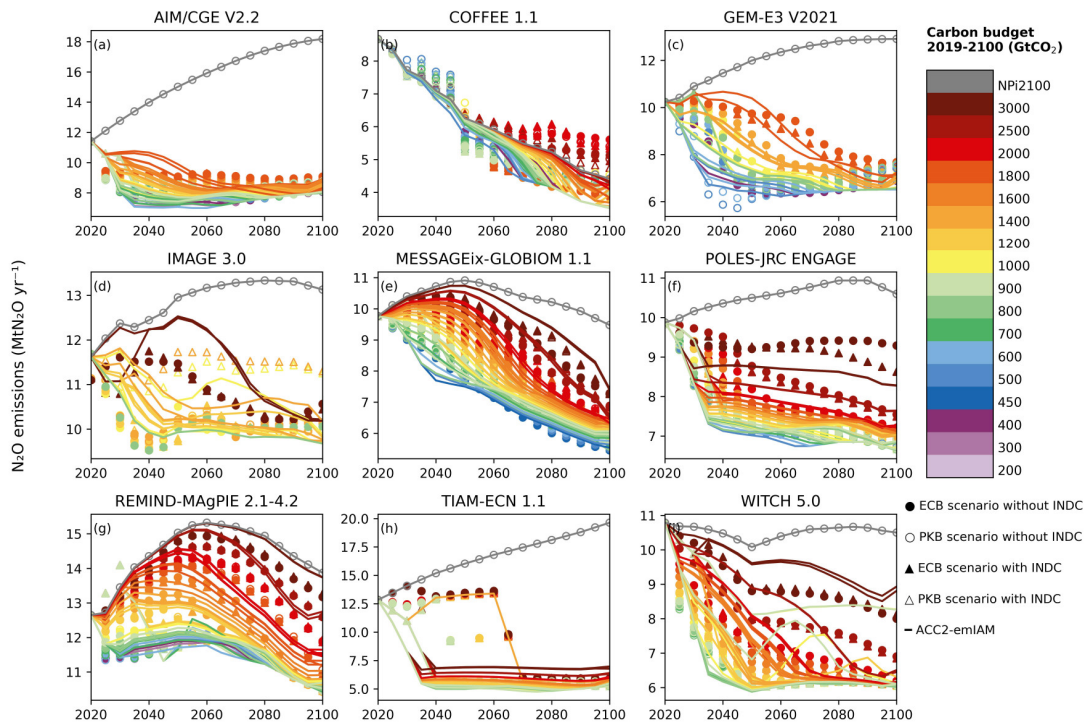

Figure S206. Test 4 – Global nine IAMs total anthropogenic N<sub>2</sub>O validation results



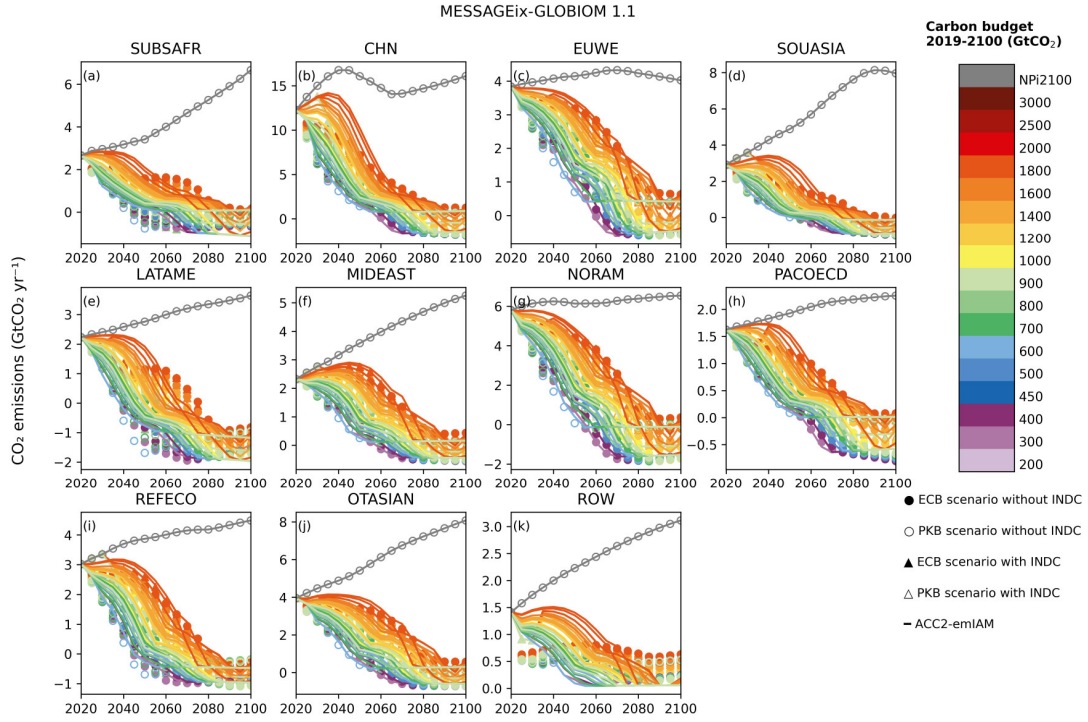

**Figure S207. Test 4 - Regional AIM total anthropogenic CO<sub>2</sub> validation results**

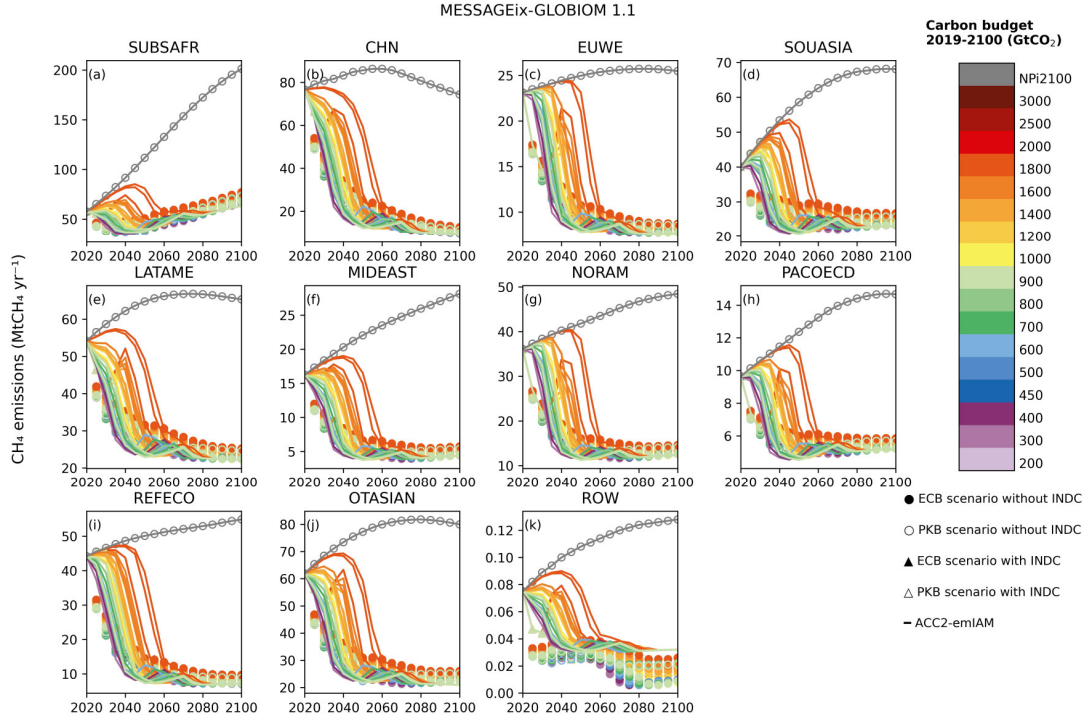

**Figure S208. Test 4 - Regional AIM total anthropogenic CH<sub>4</sub> validation results**

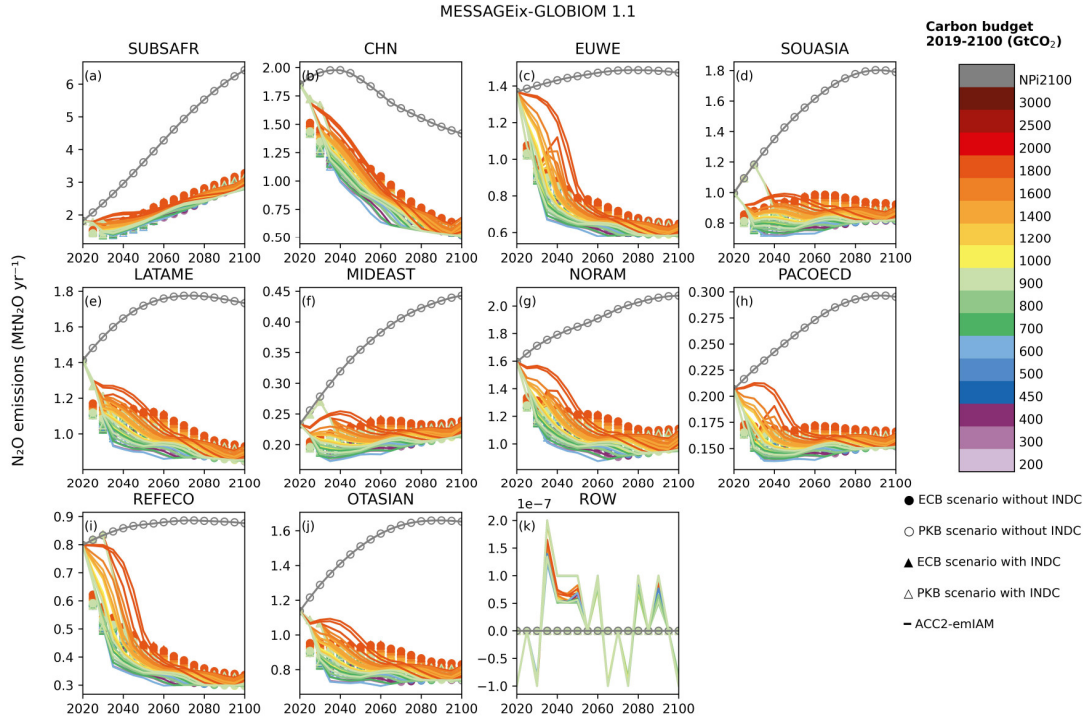

**Figure S209. Test 4 - Regional AIM total anthropogenic N<sub>2</sub>O validation results**

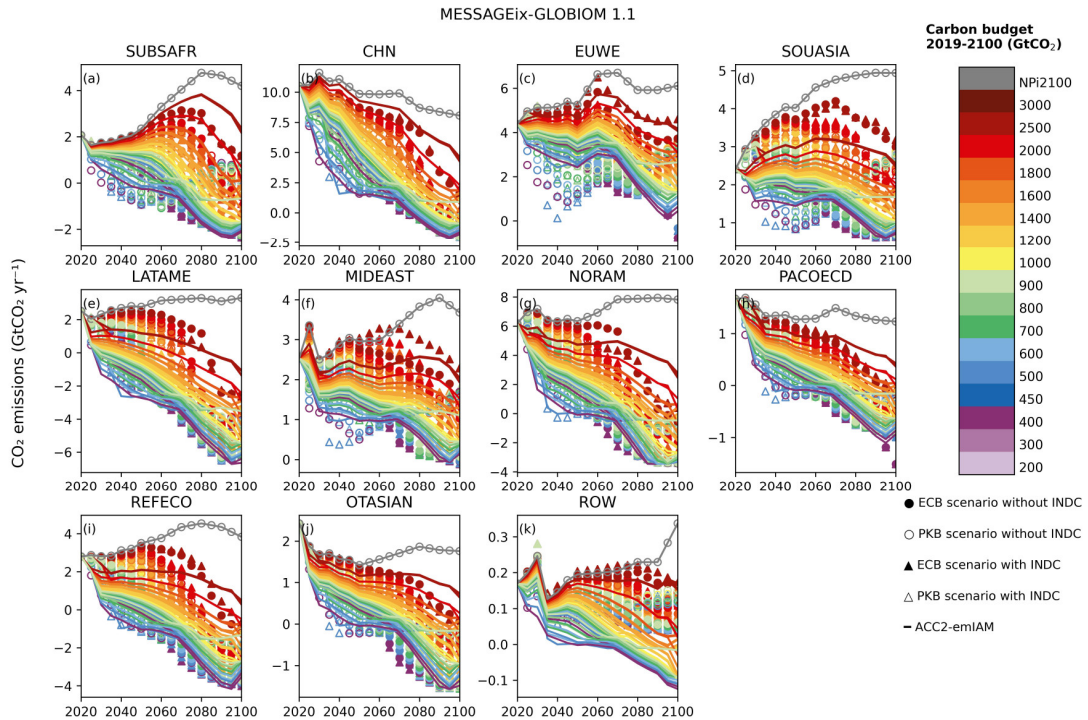

**Figure S210. Test 4 - Regional COFFEE total anthropogenic CO<sub>2</sub> validation results**



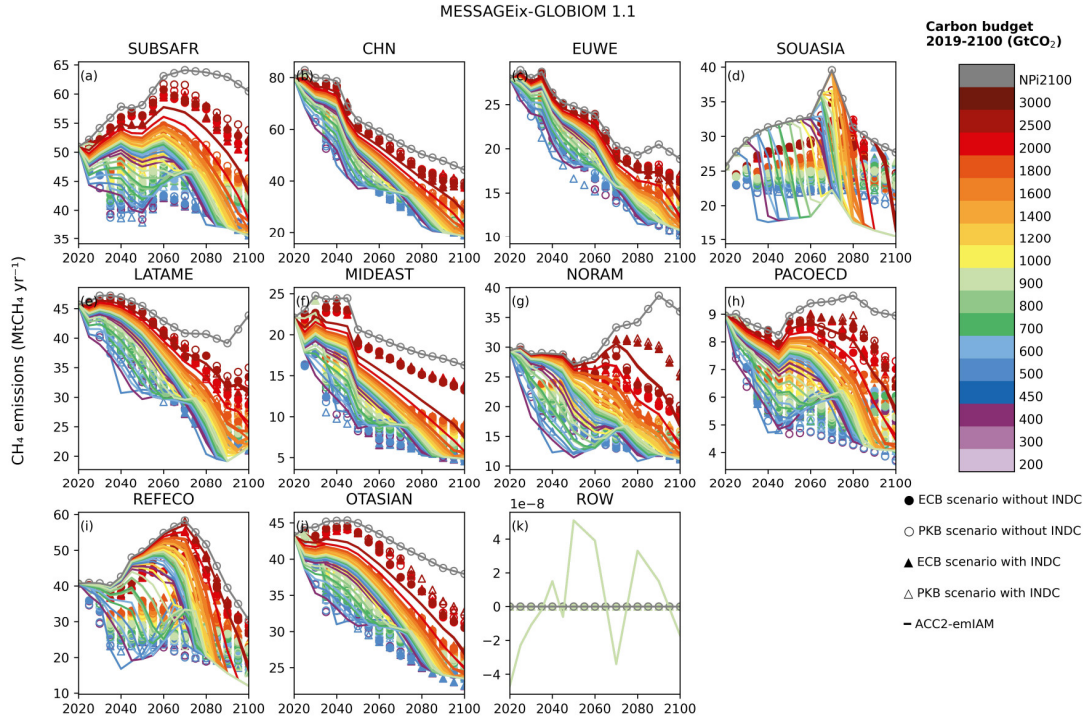

**Figure S211. Test 4 - Regional COFFEE total anthropogenic CH<sub>4</sub> validation results**

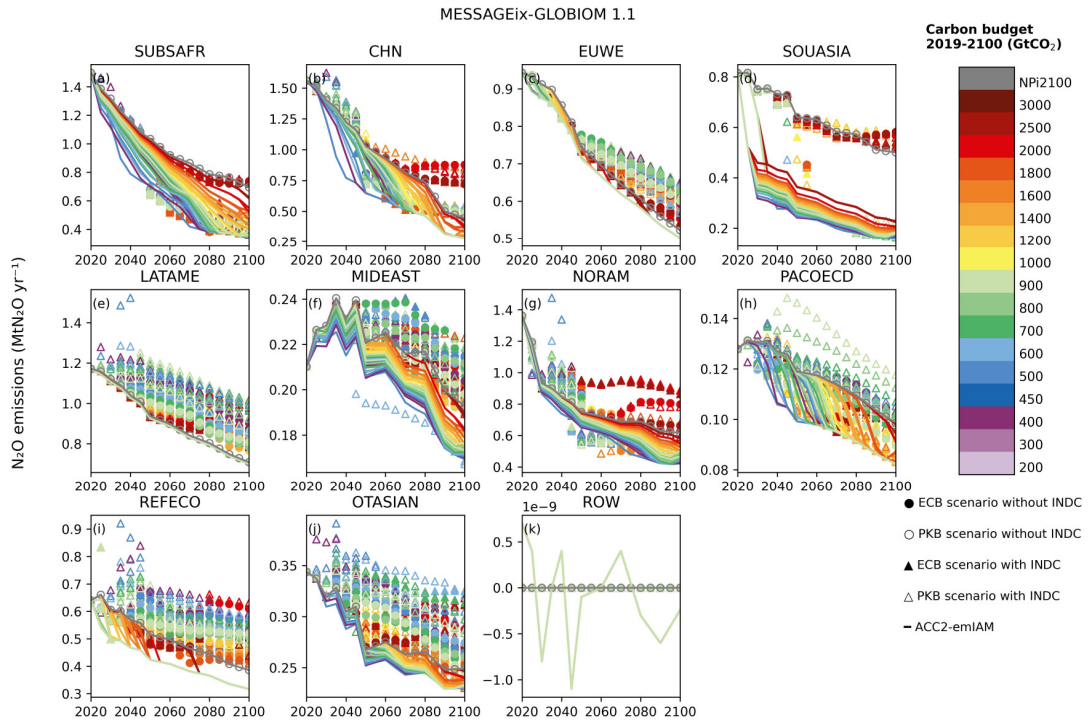

**Figure S212. Test 4 - Regional COFFEE total anthropogenic N<sub>2</sub>O validation results**

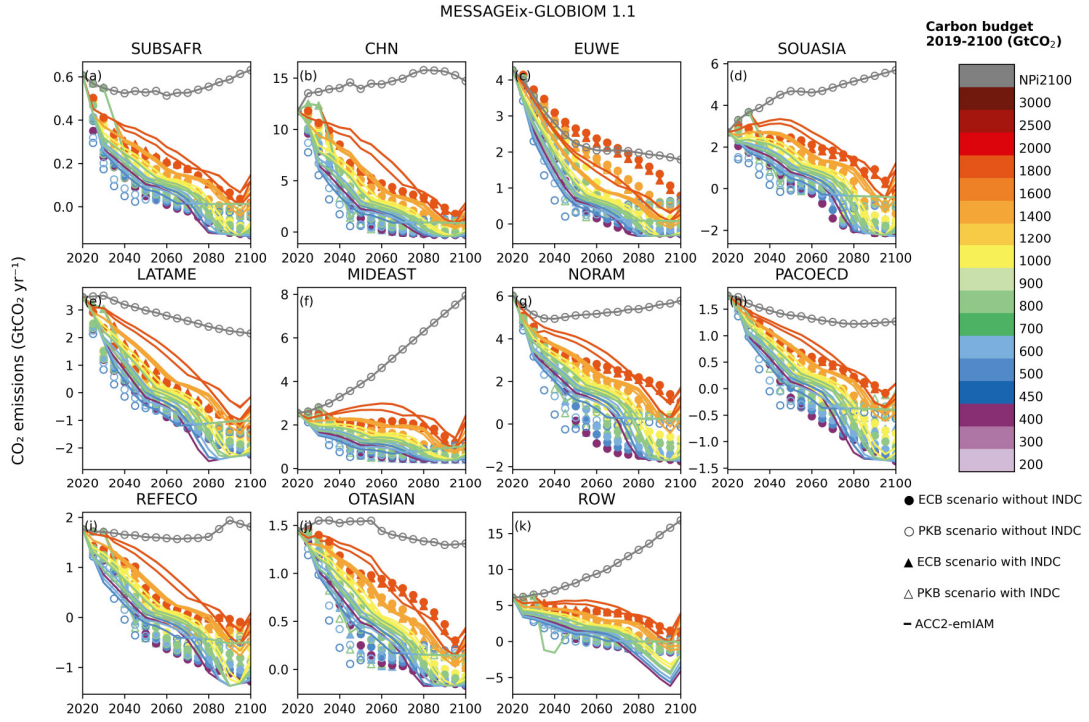

**Figure S213. Test 4 - Regional GEM total anthropogenic CO<sub>2</sub> validation results**

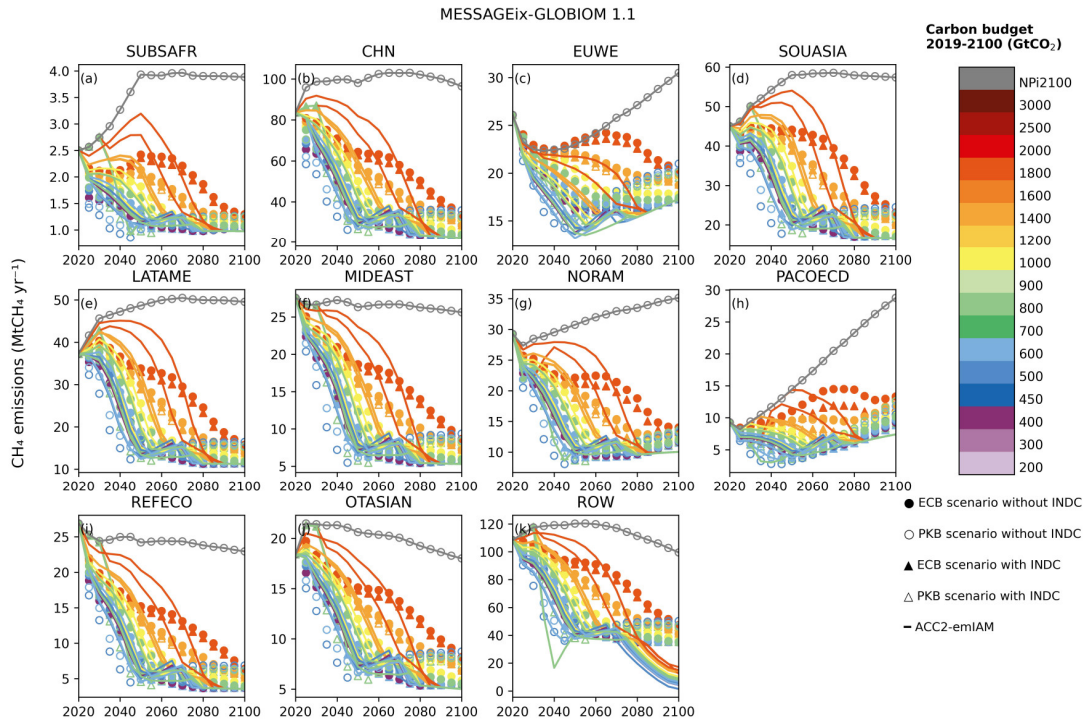

**Figure S214. Test 4 - Regional GEM total anthropogenic CH<sub>4</sub> validation results**

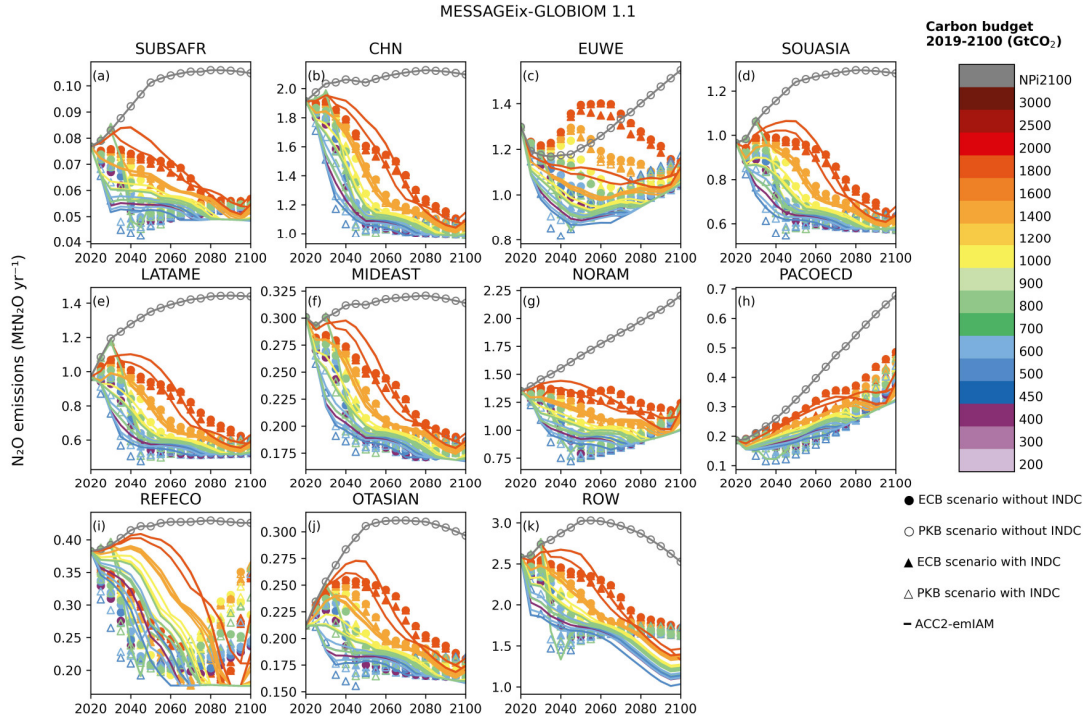

**Figure S215. Test 4 - Regional GEM total anthropogenic N<sub>2</sub>O validation results**

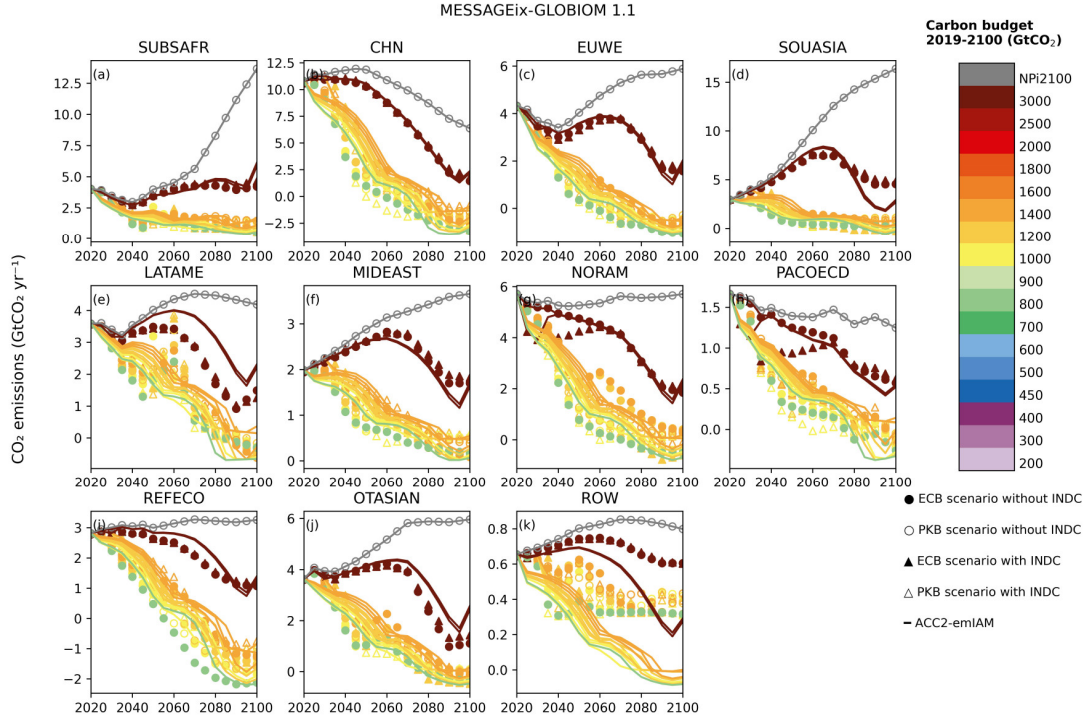

**Figure S216. Test 4 - Regional IMAGE total anthropogenic CO<sub>2</sub> validation results**



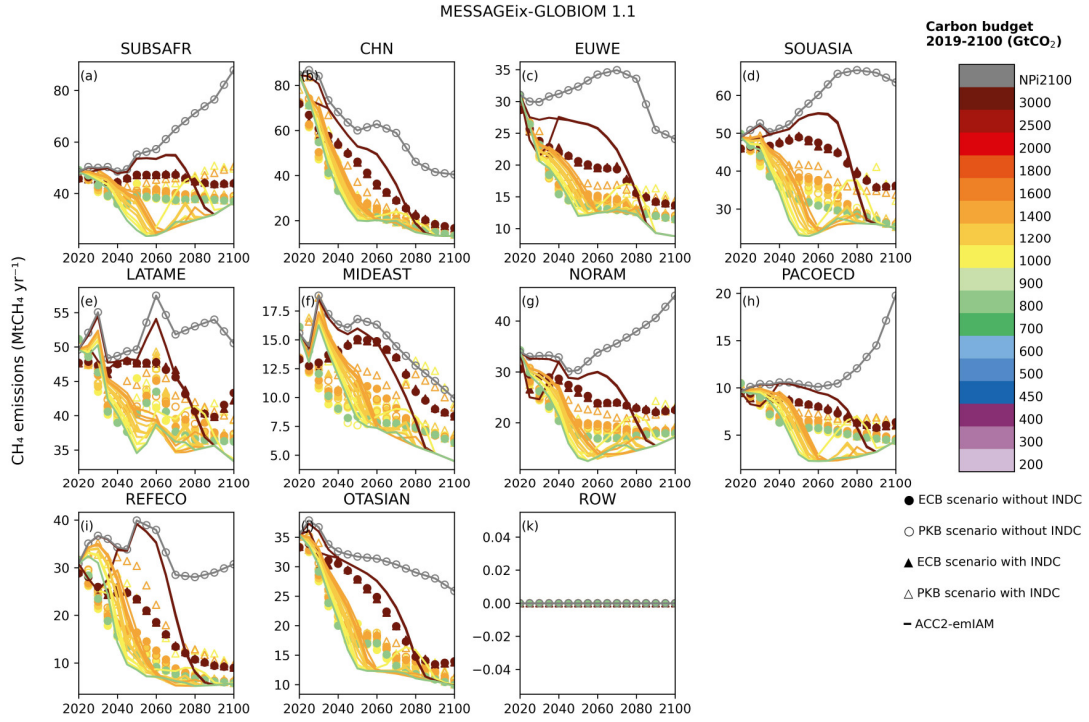

**Figure S217. Test 4 - Regional IMAGE total anthropogenic CH<sub>4</sub> validation results**

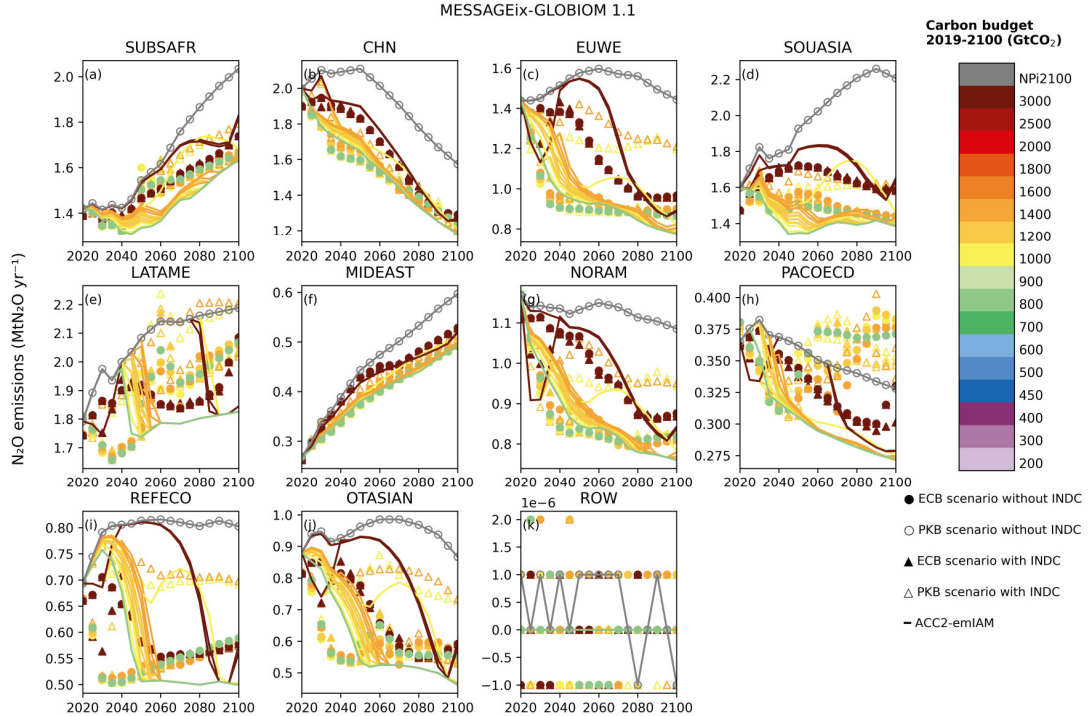

**Figure S218. Test 4 - Regional IMAGE total anthropogenic N<sub>2</sub>O validation results**



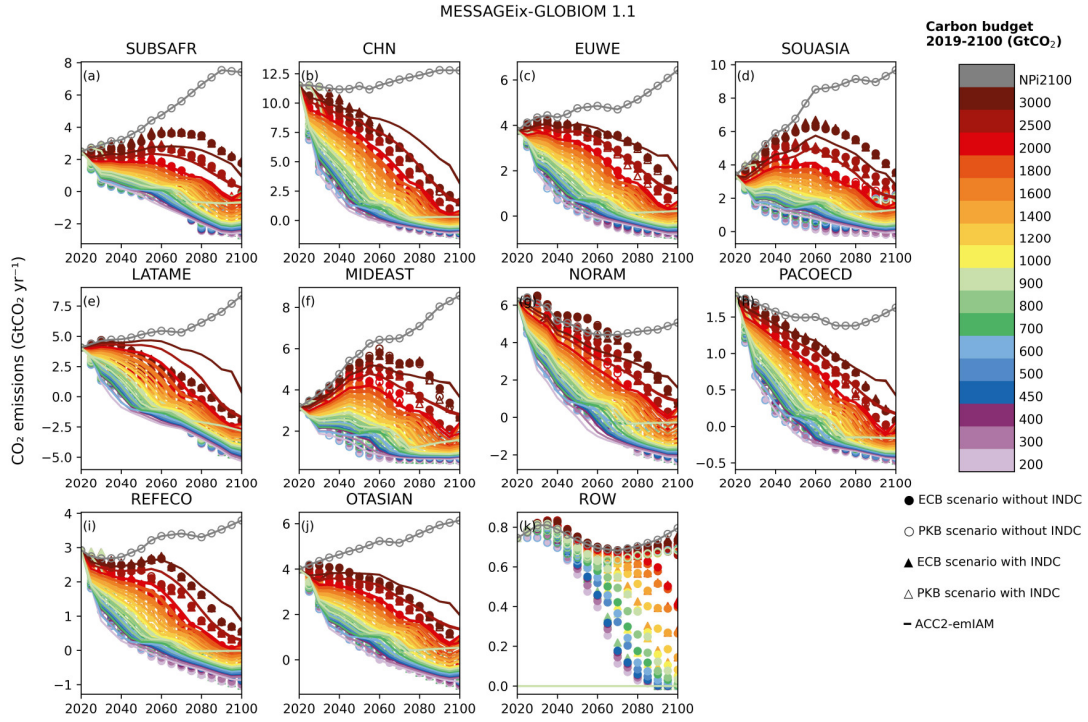

**Figure S219. Test 4 - Regional MESSAGE total anthropogenic CO<sub>2</sub> validation results**

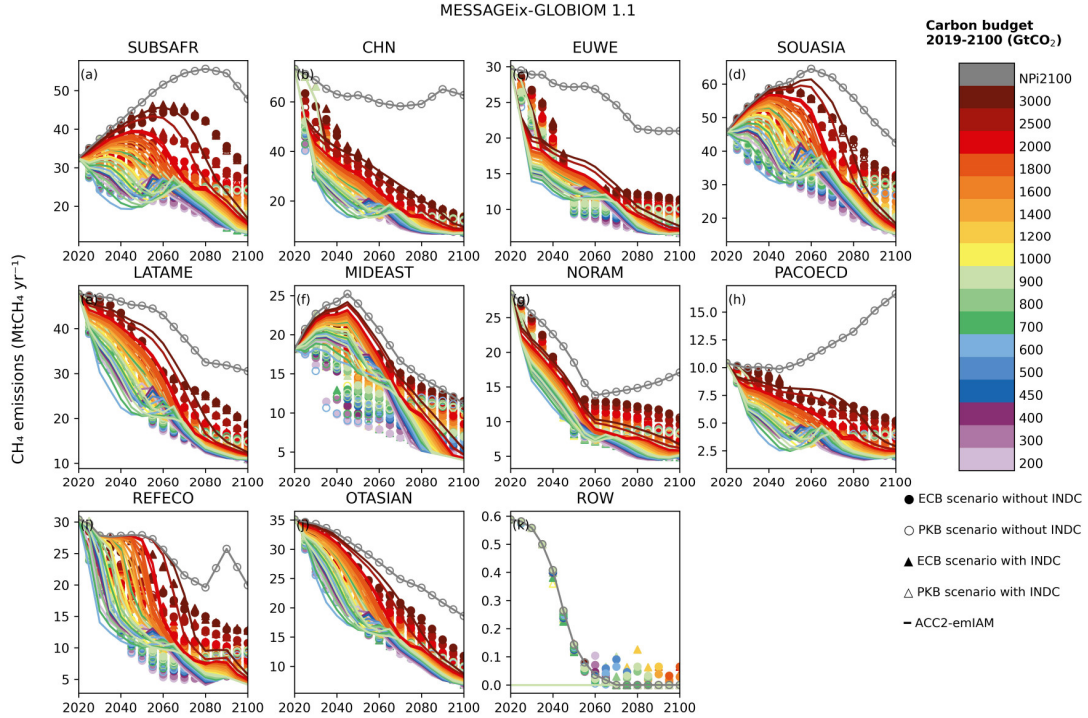

**Figure S220. Test 4 - Regional MESSAGE total anthropogenic CH<sub>4</sub> validation results**

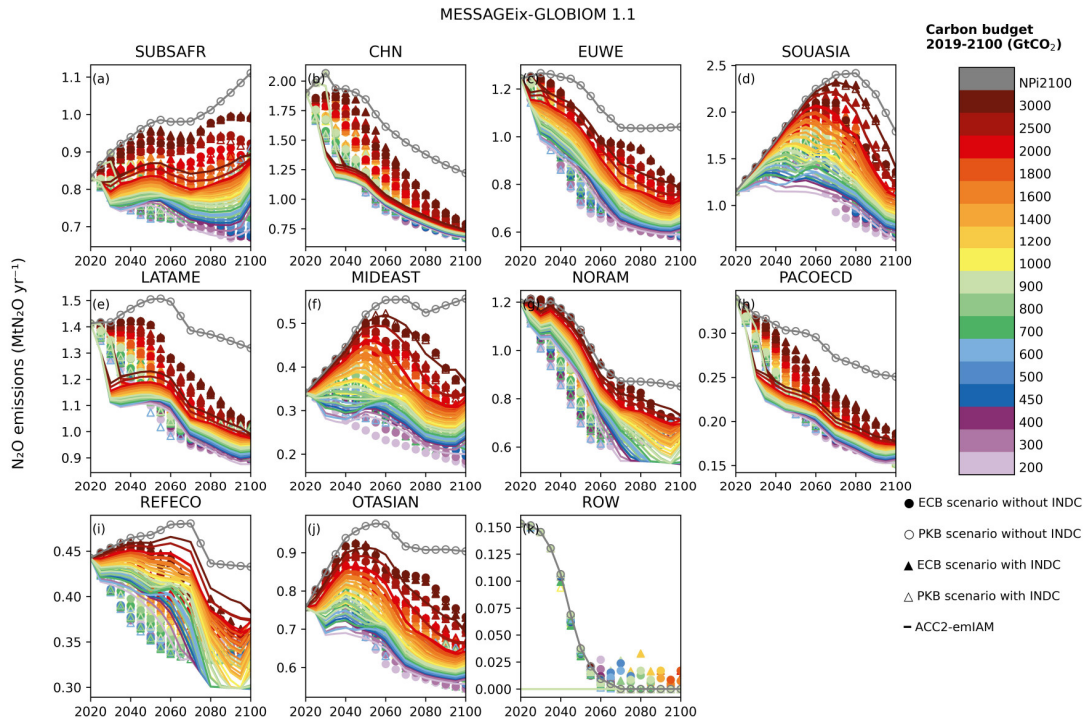

**Figure S221. Test 4 - Regional MESSAGE total anthropogenic N<sub>2</sub>O validation results**

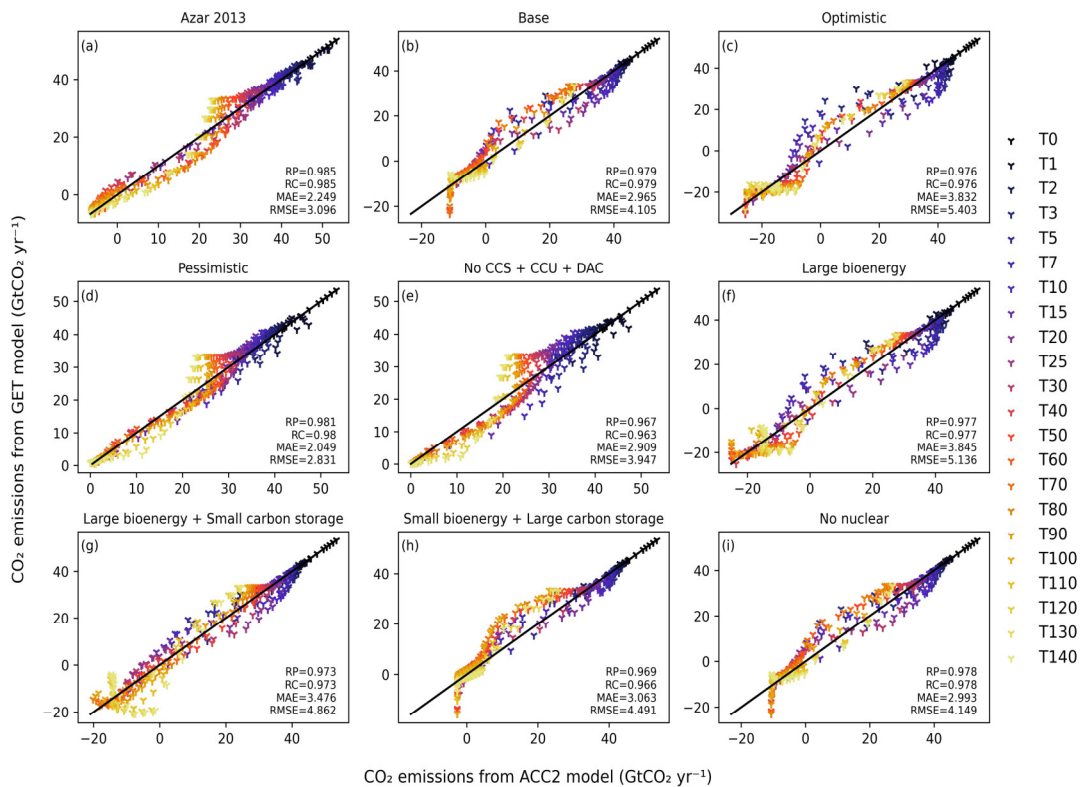

**Figure S222. Test 4 - GET - Reproducibility of energy-related CO<sub>2</sub>**

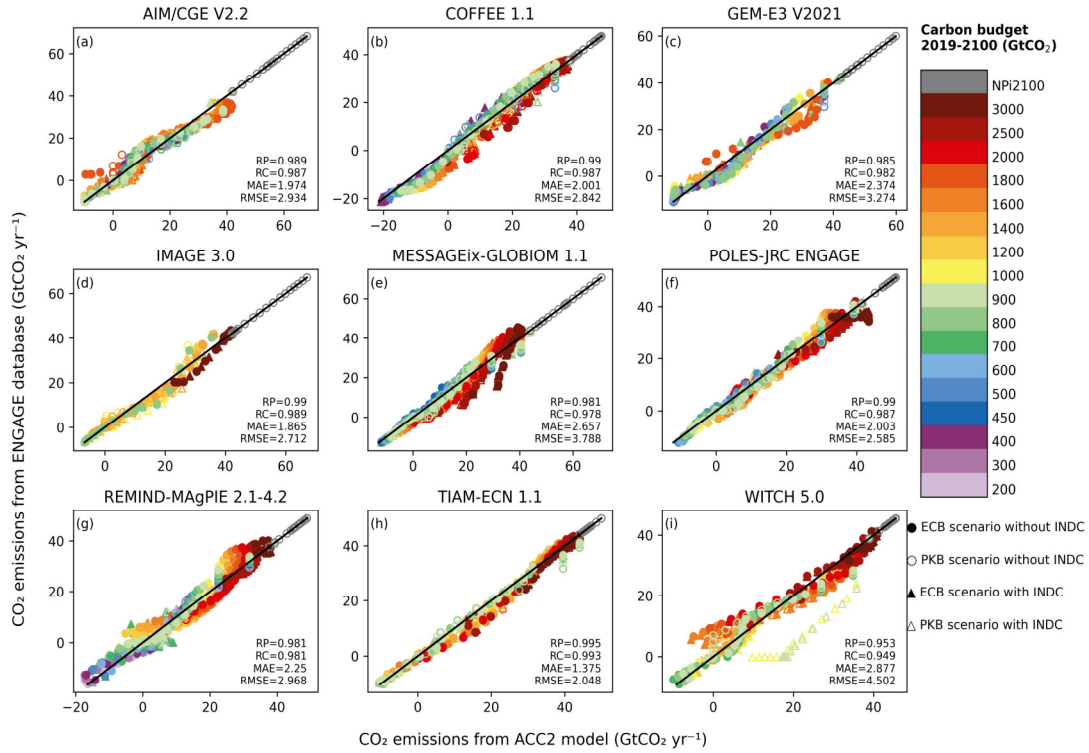

Figure S223. Test 4 - Global nine IAMs - Reproducibility of total anthropogenic CO<sub>2</sub>

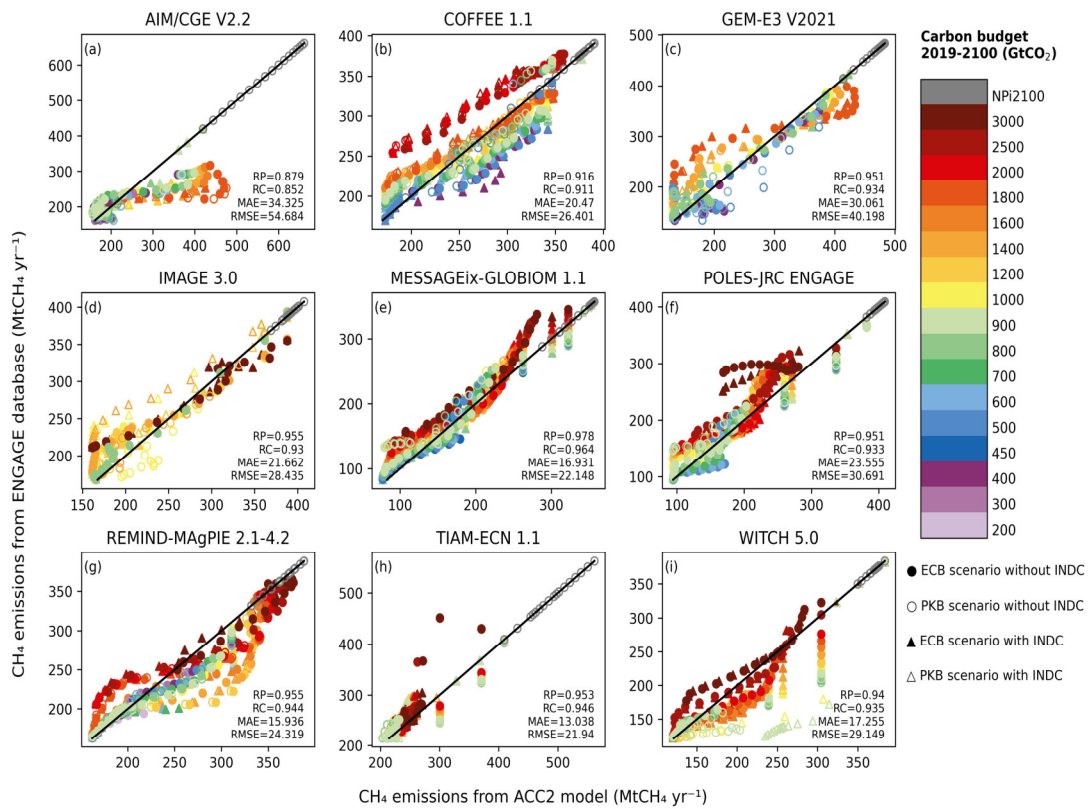

Figure S224. Test 4 - Global nine IAMs - Reproducibility of total anthropogenic CH<sub>4</sub>



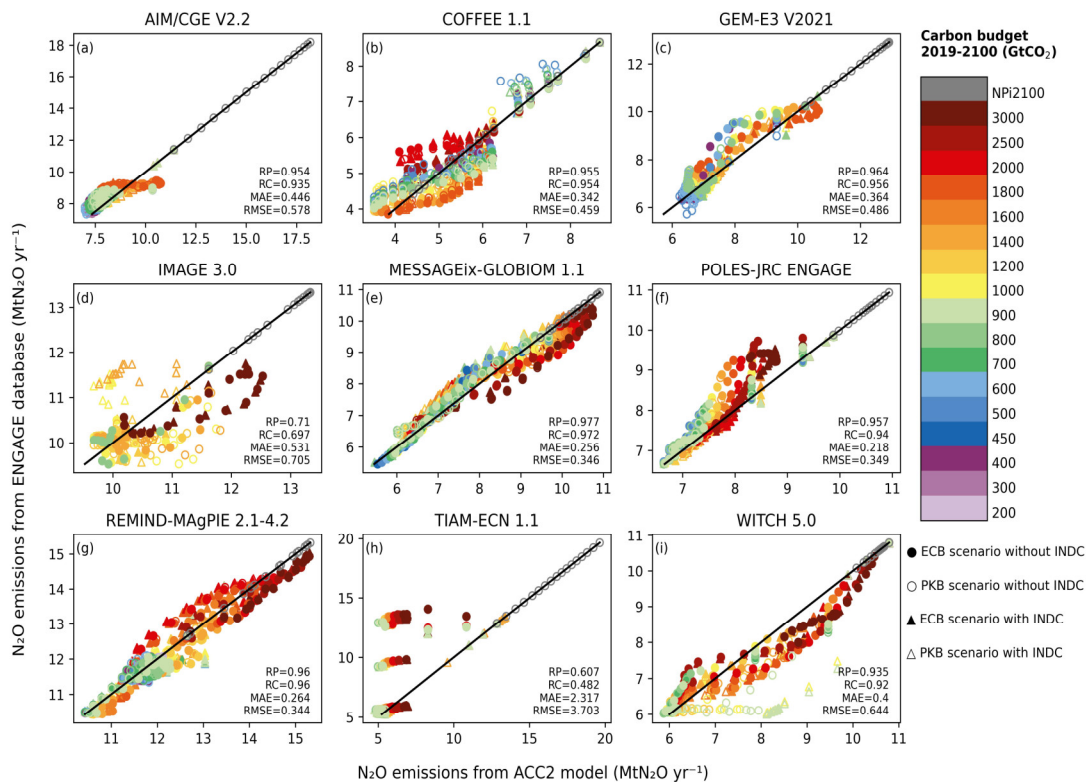

Figure S225. Test 4 - Global nine IAMs - Reproducibility of total anthropogenic  $N_2O$

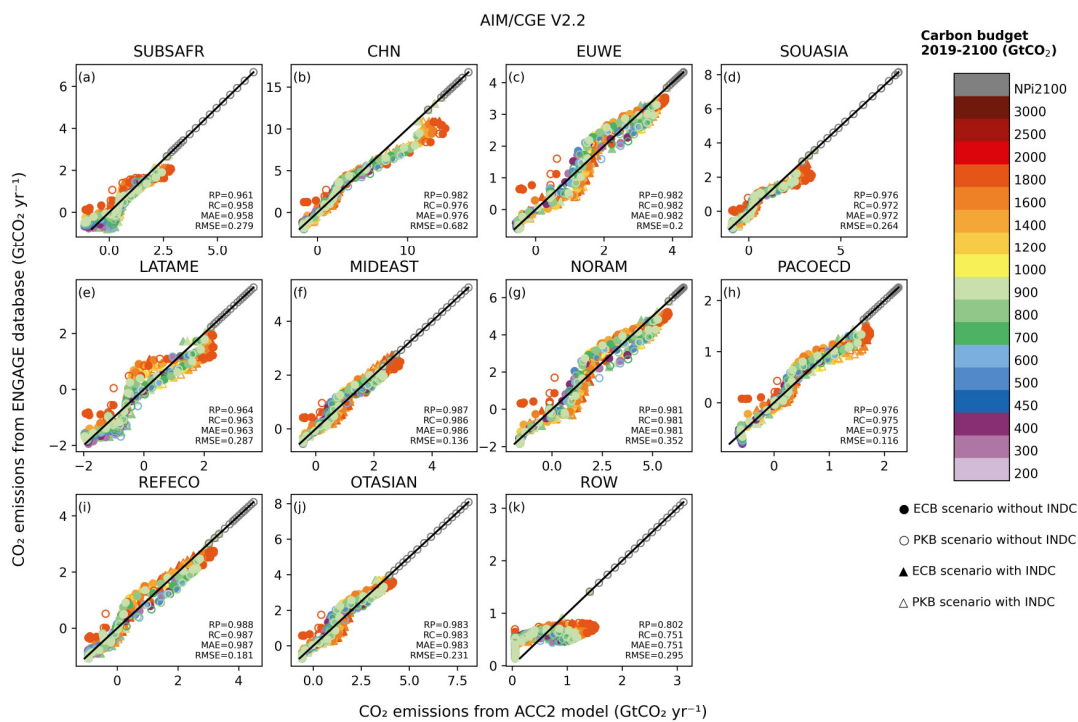

Figure S226. Test 4 - Regional AIM - Reproducibility of total anthropogenic  $CO_2$



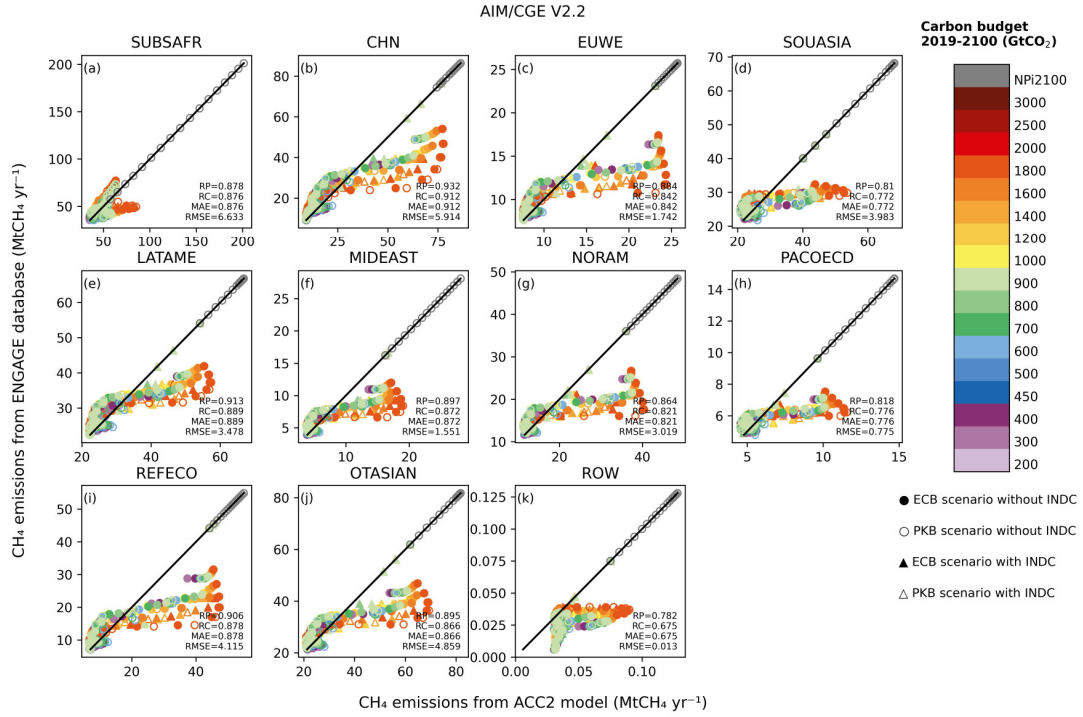

**Figure S227. Test 4 - Regional AIM - Reproducibility of total anthropogenic CH<sub>4</sub>**

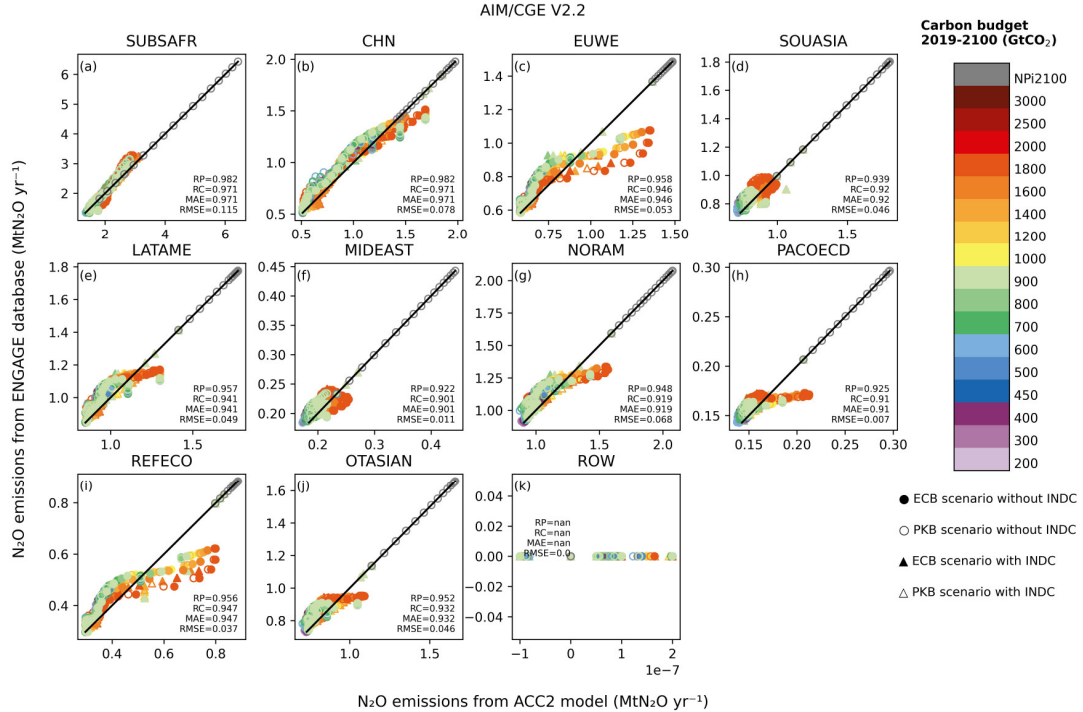

**Figure S228. Test 4 - Regional AIM - Reproducibility of total anthropogenic N<sub>2</sub>O**

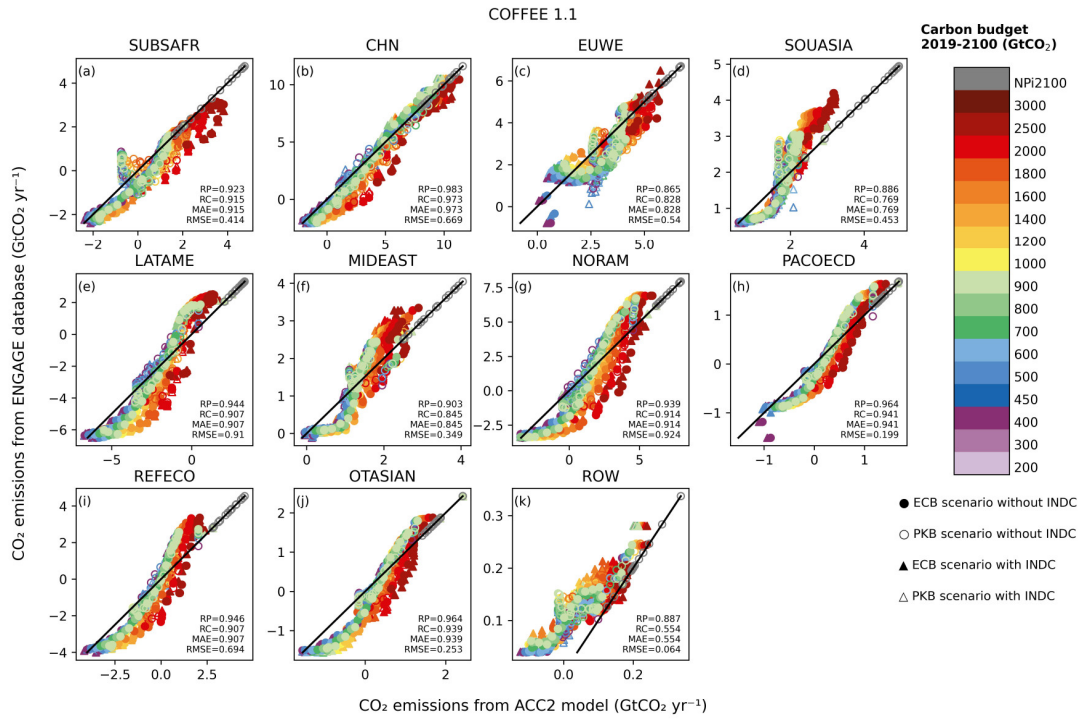

**Figure S229. Test 4 - Regional COFFEE - Reproducibility of total anthropogenic CO<sub>2</sub>**

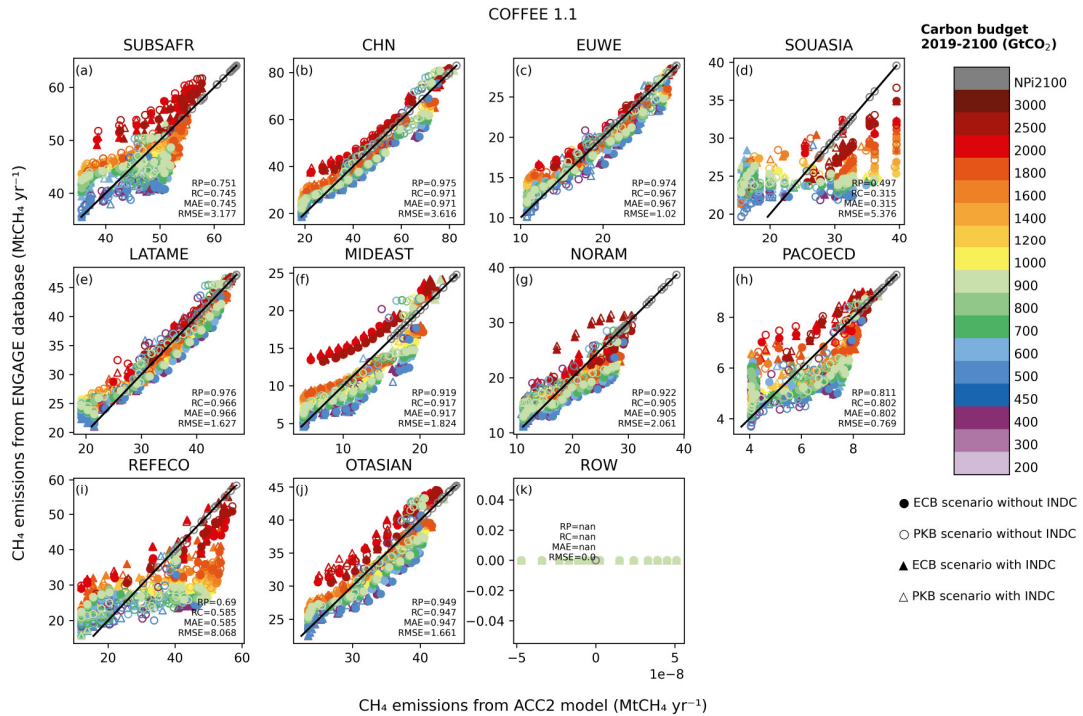

**Figure S230. Test 4 - Regional COFFEE - Reproducibility of total anthropogenic CH<sub>4</sub>**

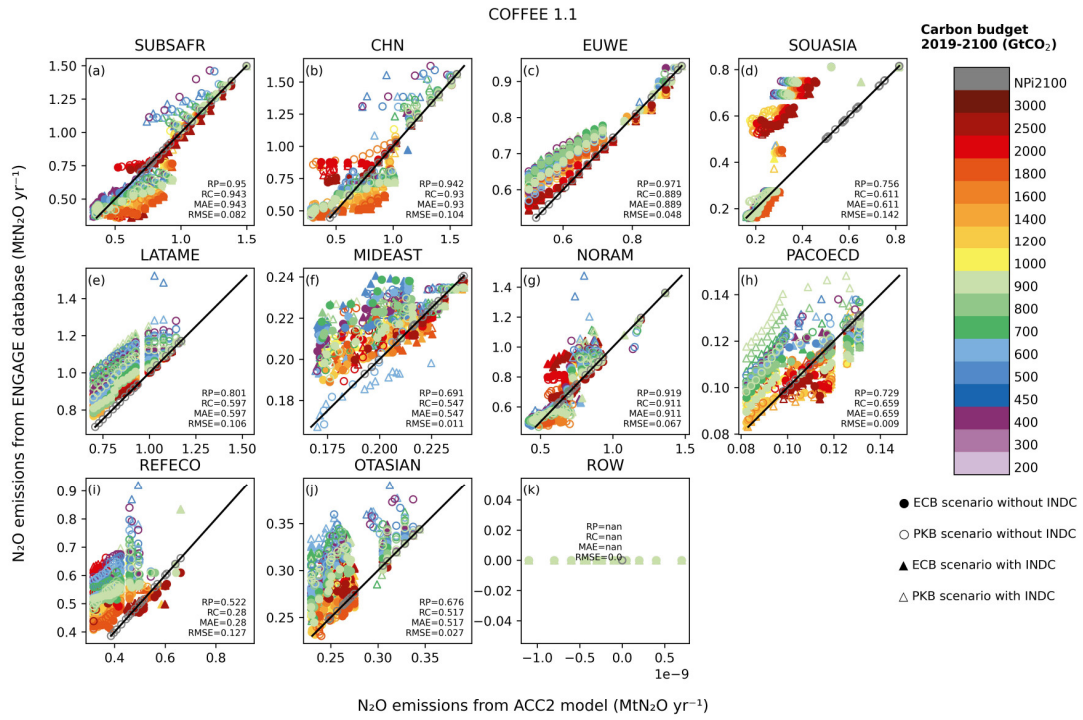

**Figure S231. Test 4 - Regional COFFEE - Reproducibility of total anthropogenic N<sub>2</sub>O**

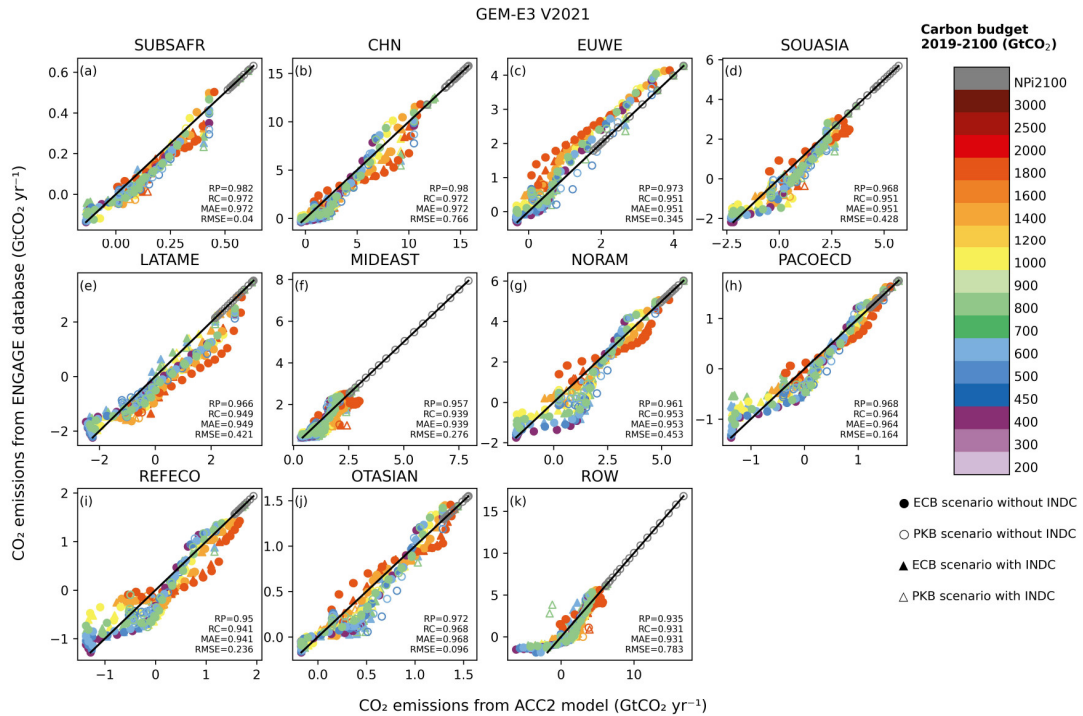

**Figure S232. Test 4 - Regional GEM - Reproducibility of total anthropogenic CO<sub>2</sub>**

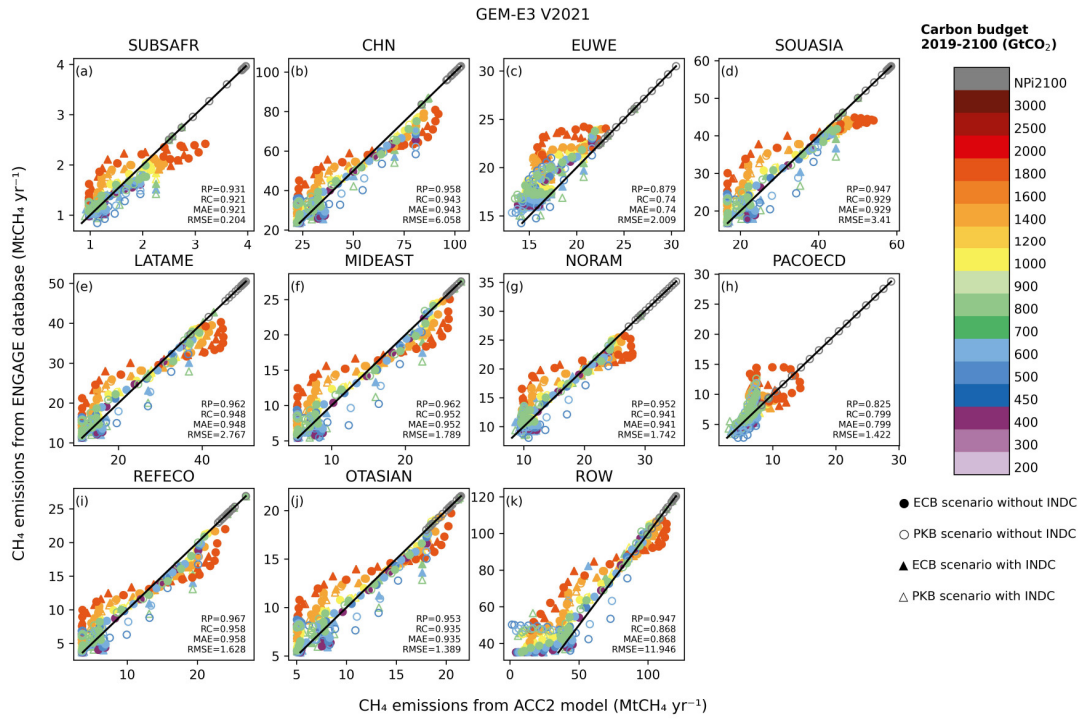

**Figure S233. Test 4 - Regional GEM - Reproducibility of total anthropogenic CH<sub>4</sub>**

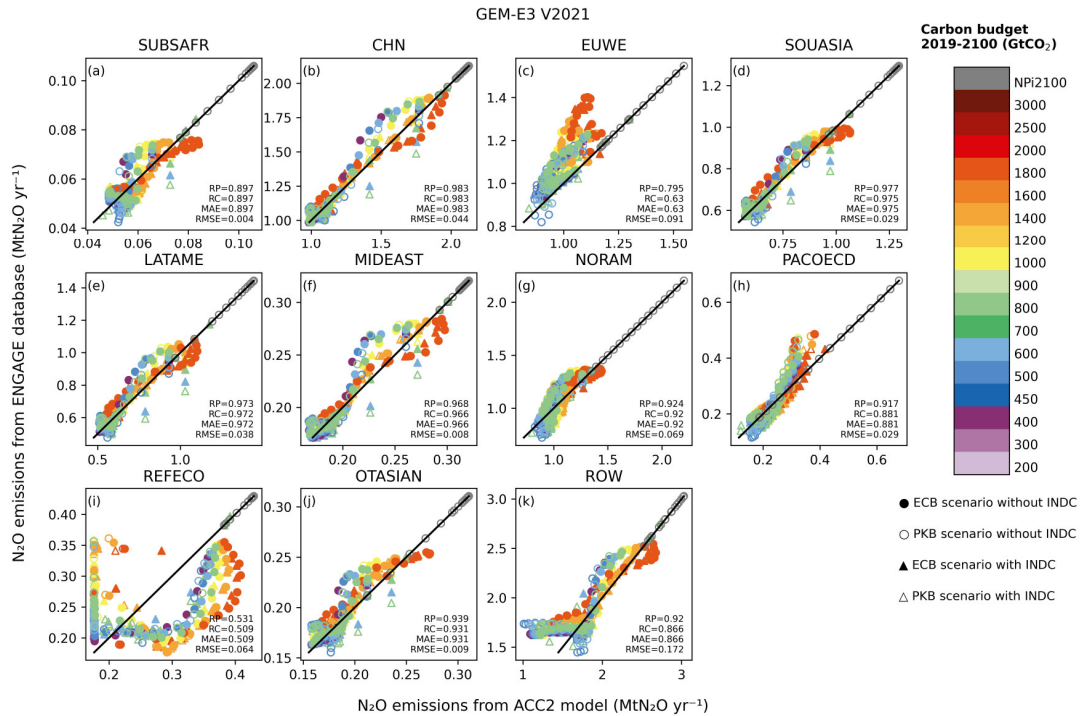

**Figure S234. Test 4 - Regional GEM - Reproducibility of total anthropogenic N<sub>2</sub>O**



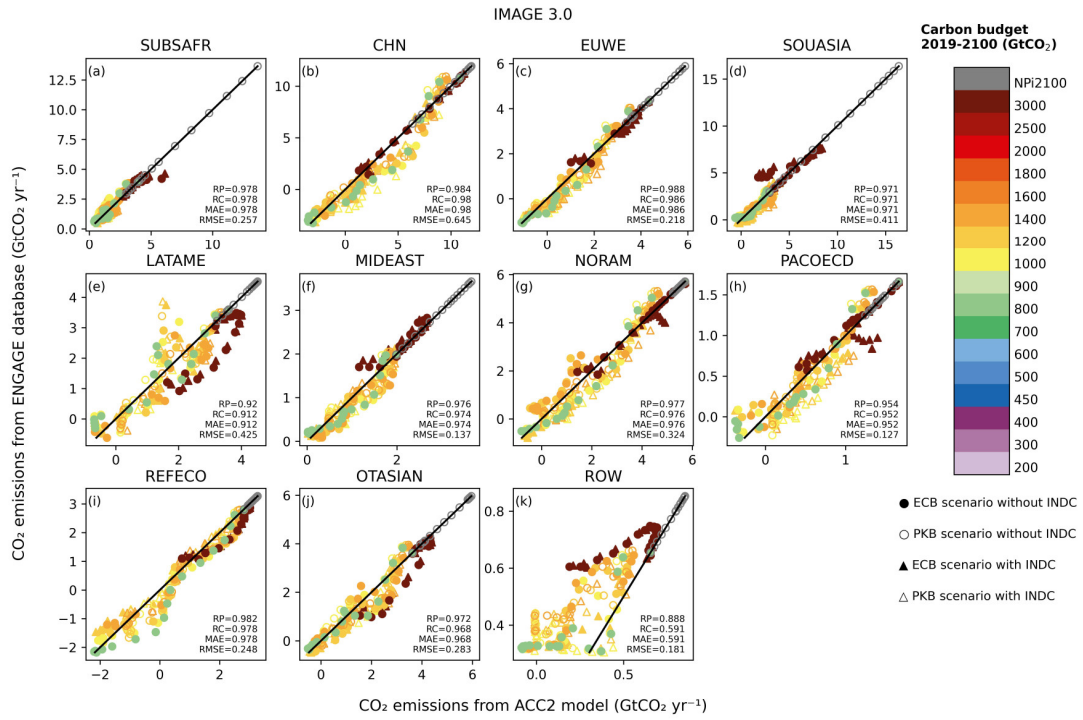

**Figure S235. Test 4 - Regional IMAGE - Reproducibility of total anthropogenic CO<sub>2</sub>**

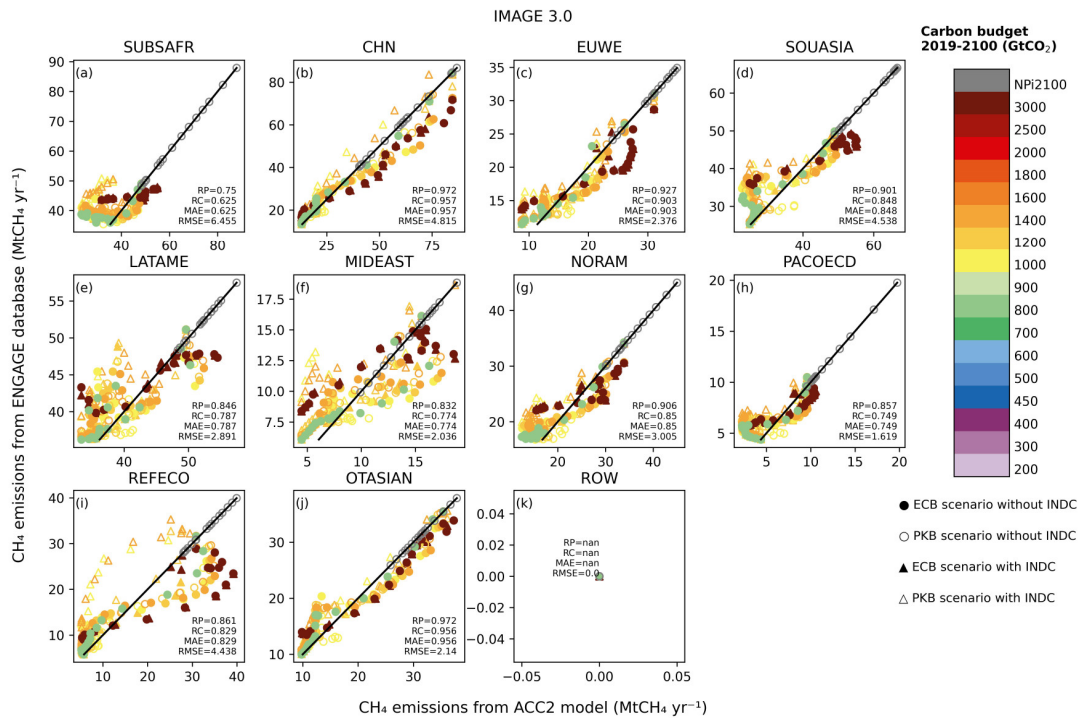

**Figure S236. Test 4 - Regional IMAGE - Reproducibility of total anthropogenic CH<sub>4</sub>**

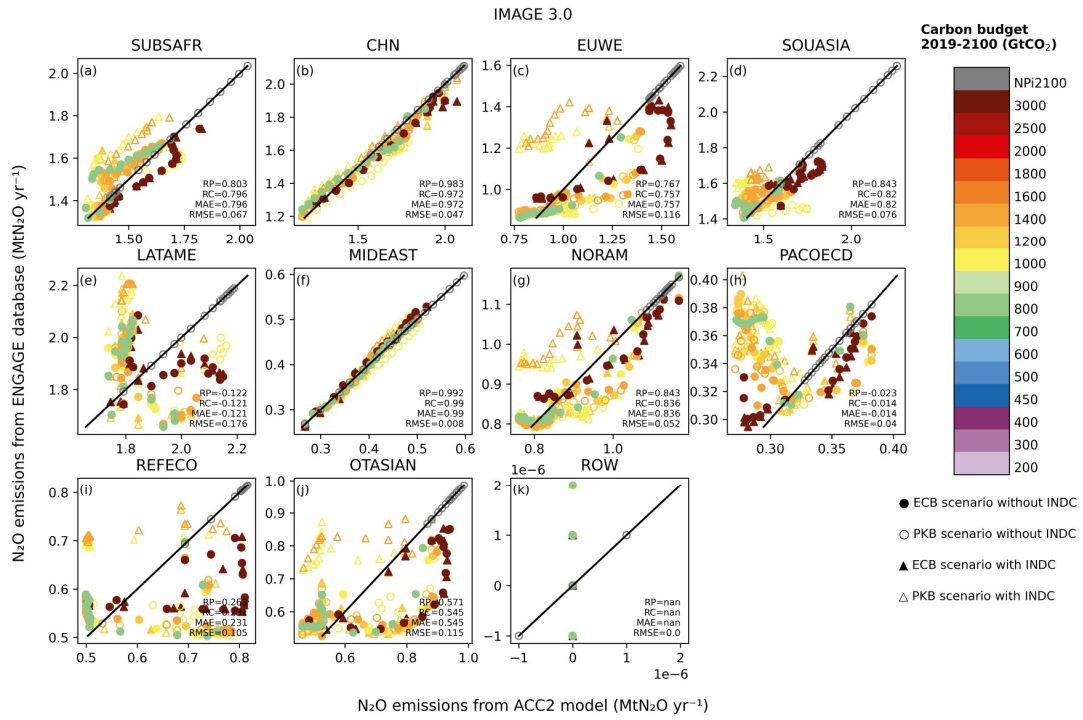

**Figure S237. Test 4 - Regional IMAGE - Reproducibility of total anthropogenic N<sub>2</sub>O**

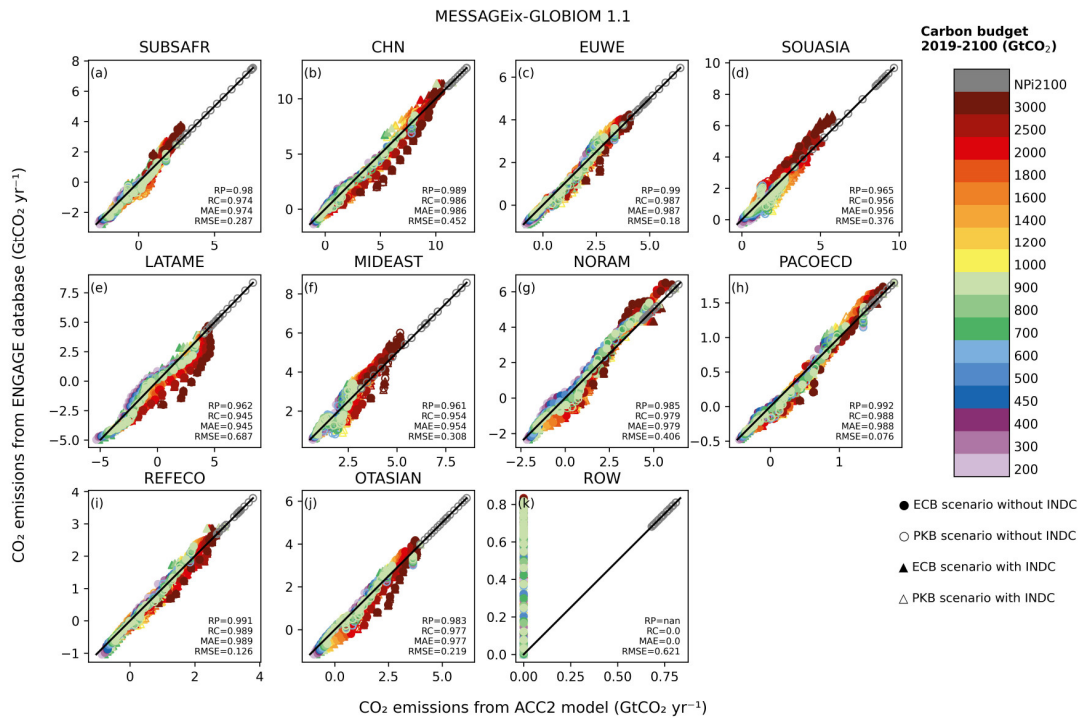

**Figure S238. Test 4 - Regional MESSAGE - Reproducibility of total anthropogenic CO<sub>2</sub>**

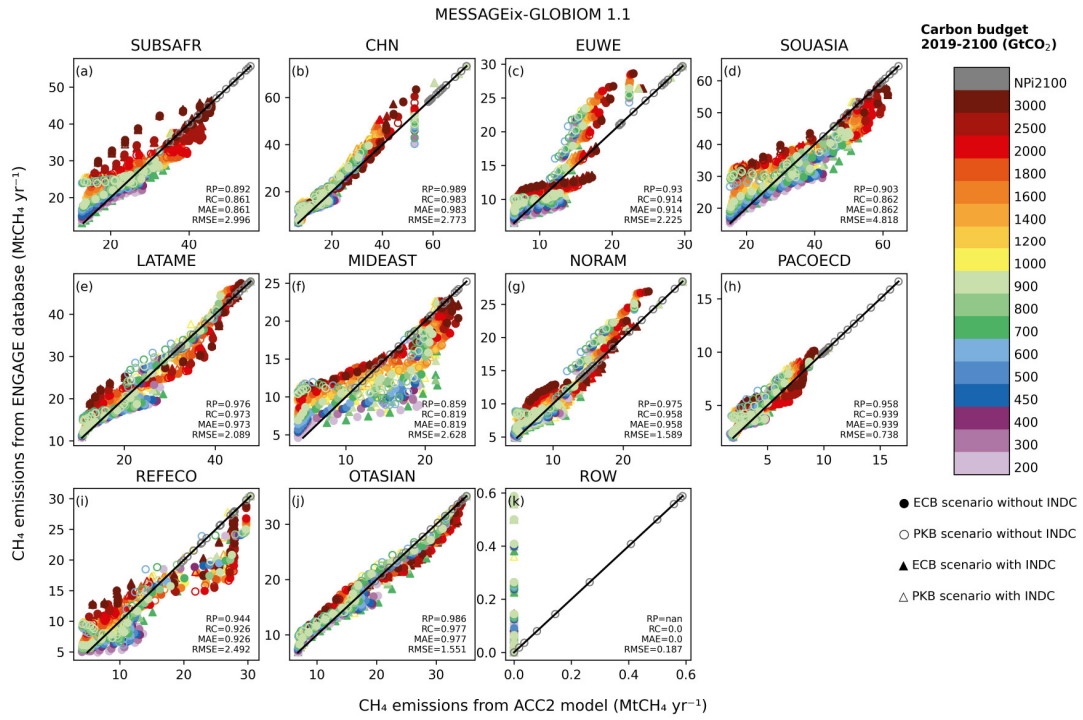

**Figure S239. Test 4 - Regional MESSAGE - Reproducibility of total anthropogenic CH<sub>4</sub>**

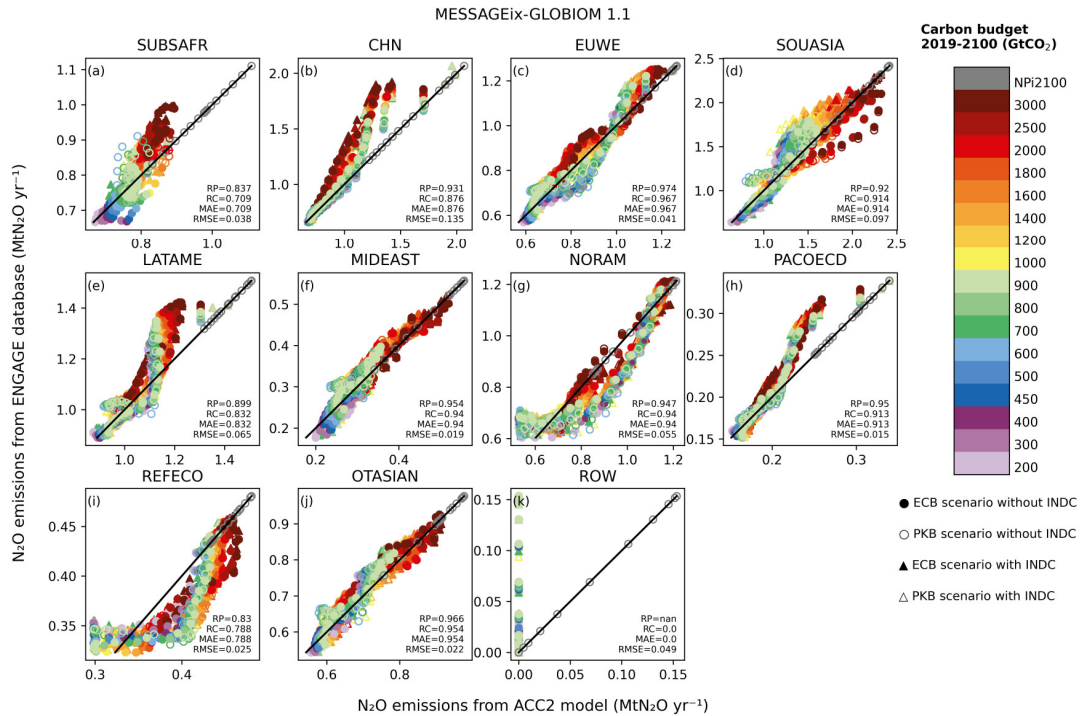

**Figure S240. Test 4 - Regional MESSAGE - Reproducibility of total anthropogenic N<sub>2</sub>O**

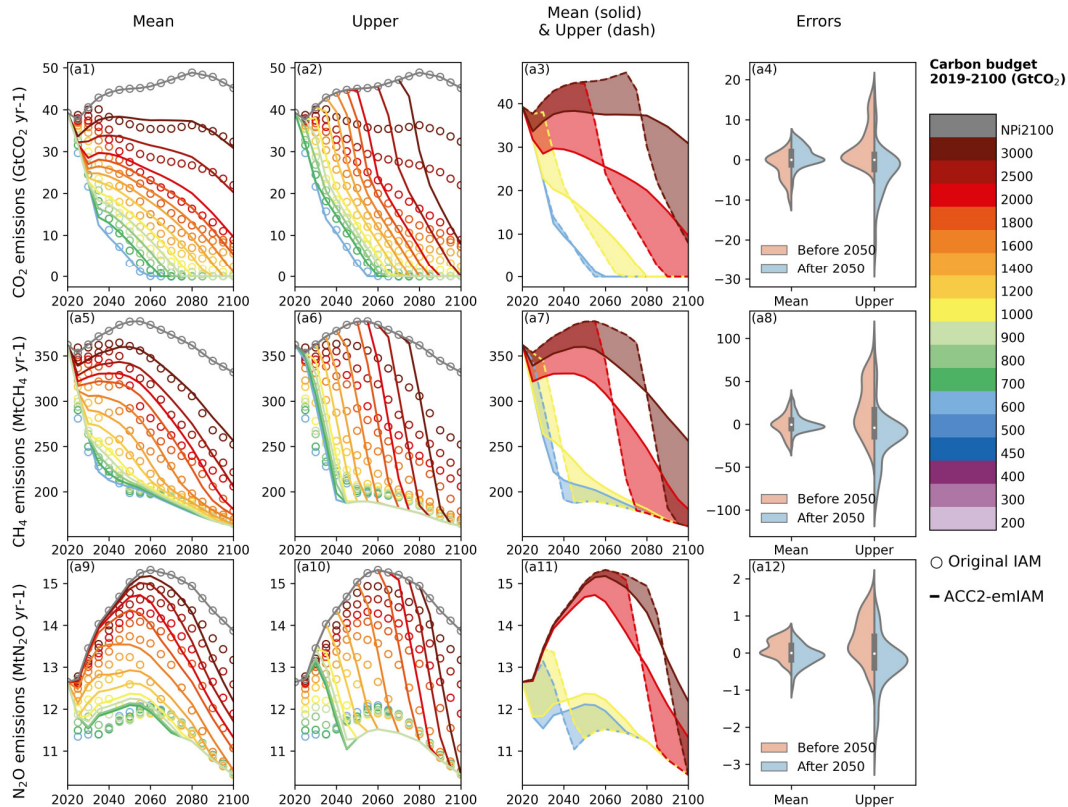

**Figure S241. Validation results for ACC2-emIAM with mean and upper MAC curves from REMIND**

The points show the original emission pathways from REMIND obtained from the ENGAGE Scenario Explorer; the lines show the emission pathways reproduced from ACC2-emIAM by using the mean (the first column) and upper (the second column) MAC curves. The third column presents the uncertainty (shaded band within two emissions pathways) of ACC2-emIAM by using different MAC curves (only cases with the carbon budgets of 600, 1000, 2000, and 3000 GtCO<sub>2</sub> are shown here). The fourth column shows the errors from the reproduced scenarios (ACC2-emIAM) relative to the original scenarios (REMIND). Positive values indicate ACC2-emIAM gives higher estimates than REMIND and vice versa. The same color is used for each pair of original and reproduced pathways. For the sake of presentation, only the outcomes of the PKB scenarios without INDC are presented. It should be noted that we only report the reproducibility results based on the upper range of the MAC curve (95% confidence interval). We tried with the lower range of the MAC curve (95% confidence interval) as well, but we were not able to obtain reasonable results because of the negative segment of the lower MAC curve. The negative segment requires re-defining the problem as a new type of mathematical problem (a discontinuous nonlinear program (DNLP)), which either made it too complex to solve in our GAMS CONOPT3/4 computational environment or made the optimal solution unreliable (i.e., the solution becomes dependent on initial conditions).
